# Supplementary material for: RAB42 Promotes Glioma Pathogenesis via the VEGF Signaling Pathway
Source: Front Oncol. 2021 Nov 29;11:657029. doi: 10.3389/fonc.2021.657029 (PMC8666624; doi:10.3389/fonc.2021.657029)
Supplement: Supplementary Table 1 — Results of survival analysis filtering. [file Table_1.xls]

gene	KM	HR	HR.95L	HR.95H	coxPvalue
A1BG-AS1	1.27935773086563e-10	1.54181239930751	1.36193279941052	1.74544990449403	7.89453789325176e-12
A2ML1	4.44089209850063e-16	0.622862032657194	0.554955213567977	0.699078235938276	9.11966442969251e-16
AAED1	0	2.33289774027257	2.03184058436436	2.67856243666452	2.9107717172971e-33
AAGAB	1.3864465131519e-12	1.9144223004954	1.61844637832781	2.26452528406953	3.4911687171967e-14
AATK	2.77926126557304e-09	0.819086708877455	0.772408999291217	0.868585214925433	2.62615570272525e-11
ABCA13	0	1.75936151621442	1.59033785047465	1.94634928912272	5.7739968065424e-28
ABCA17P	0	0.522118922876702	0.465528403730928	0.58558869328088	1.22007333469124e-28
ABCB4	0	1.78561396689178	1.60352419289191	1.98838112508225	4.34781379471265e-26
ABCB7	1.0688689155991e-08	1.60283617836664	1.38790174849042	1.85105596810099	1.34424604472816e-10
ABCC1	0	1.83045101757554	1.65328605009462	2.02660085806178	2.58100655218158e-31
ABCC3	0	1.34332630707282	1.28645121641988	1.40271589333623	8.84305427878266e-41
ABCC8	0	0.74135472436429	0.710179096768419	0.773898907808142	1.93139485157256e-42
ABCD1	9.61453139325386e-14	1.56446360566985	1.40711047690386	1.73941308350641	1.28668453505795e-16
ABCD3	4.54303261676614e-13	1.57836478376758	1.40481709311637	1.77335213448411	1.59911431697741e-14
ABHD14A	0	0.720961027185799	0.674833865794705	0.770241134992073	3.06368148789777e-22
ABHD15	0	1.85350241819662	1.6484574470673	2.08405210602957	5.94925008986257e-25
ABHD6	4.74065231514942e-14	0.741499464299961	0.680276684698273	0.808232103090516	1.02956940656482e-11
ABI3	4.38205027819549e-13	1.36736632841012	1.26340963363721	1.47987685568547	8.79920933443461e-15
ABLIM1	0	0.617740679019055	0.56562951429689	0.674652819326937	8.89122255347572e-27
ABLIM2	3.63391650104461e-10	0.742372661652582	0.682562071800653	0.80742424980522	3.62349284288054e-12
ABLIM3	0	0.704259154218703	0.653794198019233	0.758619390939062	2.41838373948953e-20
ABRACL	0	1.57067741078581	1.44393140630093	1.70854897814909	7.15560262855549e-26
ABT1	1.11022302462516e-15	1.82896650853405	1.57906805806034	2.11841311858858	7.98326814402513e-16
AC000123.4	7.9311980316632e-09	2.11276062270328	1.71965602800237	2.5957269222211	1.07012348354501e-12
AC002429.5	0	0.405571641472111	0.338673347812873	0.485684384167327	9.96424599795372e-23
AC002454.1	0	1.50538990765679	1.41519439572166	1.60133390926786	1.67240065697561e-38
AC002456.2	1.29052324382428e-11	1.31769424533401	1.22196111759684	1.42092747402723	7.56219717390416e-13
AC003090.1	3.67276239421344e-08	1.67775515967681	1.48634162012845	1.89381925238621	5.65618933228765e-17
AC003102.3	0	0.258519955245475	0.208628504493439	0.32034245474939	4.01177173478821e-35
AC003986.6	0	2.75801736283629	2.19454225453268	3.46617147972221	3.30334278678769e-18
AC004019.13	4.98490138056695e-14	0.498419676812608	0.424464750003135	0.585259846034683	1.9439383321797e-17
AC004067.5	0	2.15184498282994	1.88355844181808	2.45834518713468	1.66245278668264e-29
AC004797.1	1.34891320335839e-10	1.4802267735811	1.33160586140199	1.6454353084023	3.73523914930067e-13
AC004899.1	1.12188036638372e-12	0.577504176983204	0.480372324557727	0.694276204900247	5.11272925062911e-09
AC004980.10	4.65072425015478e-12	2.18188831436799	1.84287208421529	2.58327024276494	1.36055965725503e-19
AC005083.1	0	2.18849069264907	1.89609409056521	2.52597776431227	9.79064125486265e-27
AC005264.2	2.89768209427166e-14	2.0030581437036	1.3912027117004	2.88400956475519	0.000187497264567531
AC005330.2	3.06477065947774e-12	0.603959933513719	0.53305293055018	0.684299026202535	2.50051574640878e-15
AC005682.5	0	1.85338261173073	1.64346933939589	2.09010720378177	8.24361991744246e-24
AC005740.3	1.95932159385848e-12	0.518562010541655	0.443286081649553	0.606620802927875	2.28245948279218e-16
AC005789.11	9.60784785064561e-11	1.3904760297982	1.28524920833588	1.50431805513169	2.20702248670329e-16
AC006126.4	0	1.57285867791995	1.44171729780511	1.71592893036266	2.06713131077337e-24
AC006262.6	1.2401191185063e-13	0.67385240211511	0.597136461254998	0.760424273677699	1.5415576528264e-10
AC006978.6	4.77395900588817e-15	1.79815907649238	1.57308658402683	2.05543426357058	7.96590802968728e-18
AC007375.1	0	0.234346632368921	0.183229740748236	0.299723963360915	6.77382745227376e-31
AC007879.7	6.13398221105399e-13	1.8452160163094	1.5710927477332	2.16716813934586	8.28739725323276e-14
AC008964.1	1.77635683940025e-15	1.32309138053502	1.22398170259895	1.43022628322709	1.82118382494401e-12
AC009005.2	6.99030944240064e-10	1.32271899925535	1.21881679534299	1.4354787017016	2.07349488613699e-11
AC009014.3	0	0.574600246885807	0.507802463012696	0.650184801708959	1.52914975439864e-18
AC009093.1	1.40856715180604e-09	4.06800104293461	2.57267023360645	6.43247326032868	1.94990269045655e-09
AC010441.1	0	1.47394702170152	1.38296714158421	1.57091210445833	7.85460331498851e-33
AC010642.1	1.40465417075575e-12	1.68517357783771	1.43714234067992	1.97601163577075	1.32376589173517e-10
AC011899.9	2.22044604925031e-15	1.701128740787	1.50154783724409	1.92723729537839	7.17251329046268e-17
AC012307.3	2.90402043523486e-08	1.59445289948989	1.31351522118636	1.93547817922927	2.38640770594856e-06
AC012314.8	8.69193605979035e-13	1.82814589107498	1.5001421978855	2.22786706737878	2.23475054475612e-09
AC012363.7	4.08614658775619e-08	3.29118736174444	2.49660996470943	4.33864896929024	2.91794721556242e-17
AC012593.1	0	0.290796387791399	0.220440066536503	0.383607846255675	2.34183804150219e-18
AC016773.1	0	2.06456726091636	1.81032955857471	2.35450940667594	3.02147501595203e-27
AC017002.1	0	2.4309328025469	1.96920175598118	3.00092881420068	1.39742710931086e-16
AC017116.11	1.22331700325162e-10	1.33131870389239	1.22315830898224	1.44904341352878	3.60752430034002e-11
AC018766.4	6.8782757267627e-11	1.4781118204606	1.32416651770201	1.64995453712039	3.31389915340468e-12
AC018766.5	1.4432899320127e-15	1.49914315879333	1.37722320050635	1.63185619421061	8.31843330799455e-21
AC053503.11	0	0.563457692416384	0.50815523039758	0.624778713573009	1.37628717555119e-27
AC062021.1	0	0.62830578034966	0.589787060906368	0.66934013949734	5.38071023836948e-47
AC064875.2	0	1.55032403887064	1.45039014748984	1.65714351387444	4.65356104189888e-38
AC068831.10	5.37772049113983e-11	0.385340053128183	0.286271016285698	0.518693643776502	3.19045713722546e-10
AC068831.6	1.01478825342838e-11	1.66585914117904	1.2744988766861	2.17739436967212	0.000187542416911251
AC069278.4	4.49908776900543e-10	1.61908502177856	1.41563980894975	1.85176786579102	2.01684770619597e-12
AC072062.1	9.07518504789095e-12	2.92480868724872	2.20316954985533	3.88281776024332	1.13534521219723e-13
AC073283.4	3.16202619643491e-12	0.684129243253734	0.616590085660208	0.759066407909861	8.18681019793172e-13
AC078883.3	3.45895090347881e-10	2.19469534768998	1.83260429044464	2.62832936400219	1.29101093823958e-17
AC079210.1	0	3.66023642004936	2.6399507816561	5.07484107042757	7.10367104459609e-15
AC079776.7	5.51803047699195e-12	0.565066815470901	0.463716978429326	0.688567641038162	1.5155254565811e-08
AC083799.1	1.00200847619192e-10	1.64520913933245	1.43080275552541	1.89174440829832	2.78051293783089e-12
AC083899.3	5.95989924079277e-12	2.51310602767078	1.9613199562941	3.22012830494453	3.19936275061405e-13
AC084219.4	1.99840144432528e-15	1.70822632387251	1.52163748853031	1.91769537459899	1.15665103846215e-19
AC090425.1	3.94984045470892e-12	0.711656389917354	0.638905522638171	0.792691249903343	6.31338614432085e-10
AC091878.1	0	0.170888227023909	0.122925507970838	0.237564901031793	7.66100891770733e-26
AC092162.1	6.11732886568461e-14	0.194978658982241	0.108926378979081	0.349012588271331	3.72176686523778e-08
AC092295.7	0	1.85835378463286	1.62647678360092	2.12328809342946	7.99217431127819e-20
AC092301.3	2.13185691322337e-10	2.60541254199636	2.03123053839366	3.34190254906277	4.73361624792207e-14
AC093157.1	2.18268070284466e-10	2.57311359335794	1.96750714242639	3.36512809613401	5.09435655584944e-12
AC093673.5	5.99520433297585e-14	1.40269650322121	1.29487772405664	1.51949287843564	1.1078597249197e-16
AC093802.1	0	0.00201467917477694	0.000483726278601884	0.00839096893600952	1.4961245468259e-17
AC093818.1	2.63710164816189e-11	1.93217646281091	1.62806527888412	2.29309348455567	4.77093453474454e-14
AC096559.1	2.27595720048157e-14	1.45998285726026	1.31984366098891	1.61500184188234	1.98207467172487e-13
AC097724.3	4.54414283979077e-12	0.68754466021534	0.618164757775524	0.764711436303341	5.10032130121667e-12
AC098614.2	2.8421709430404e-14	1.72301334136268	1.53690778634652	1.93165458649347	1.06510950652802e-20
AC099522.1	0	1.45155206235893	1.36036469041582	1.5488518664024	2.14381810831893e-29
AC104655.3	5.3945403699629e-11	0.660313244609887	0.585725032940693	0.744399772053767	1.14826365672951e-11
AC105053.3	1.90680804479371e-12	0.185708556014849	0.117801129671358	0.292761774639464	4.18873574234433e-13
AC108676.1	7.18421988565865e-11	1.81629067805132	1.27476706639467	2.58785460821968	0.000953400966343946
AC109642.1	1.4521717162097e-13	2.30337562719915	1.6219090859625	3.27116934351876	3.12942220807939e-06
AC112229.7	3.28518323655658e-11	0.783799407772984	0.72579321959665	0.846441513971008	5.30851231984531e-10
AC114730.3	1.78279613294308e-12	0.718923881714214	0.662086010270877	0.780641094481931	4.05630460617015e-15
AC123886.2	2.31037411424495e-12	0.570216366497738	0.481152103176007	0.675766981949453	9.00383654060056e-11
AC124789.1	0	1.75749392980176	1.54184628984736	2.00330275049391	3.10447460215838e-17
AC129929.5	3.78231335140811e-10	0.371965711957241	0.293725931367751	0.471046224034711	2.25245389037019e-16
AC131056.3	4.07451850037432e-14	0.668670792391725	0.607844584431659	0.735583798967034	1.32993200887803e-16
AC140912.1	0	0.480871698523326	0.406097870495977	0.569413452373667	2.05237494767563e-17
AC144652.1	9.11382080914791e-13	0.632147854345827	0.557757070866494	0.716460499789315	6.98436980526142e-13
AC145676.2	0	2.13542933771318	1.7832953793599	2.55709654673301	1.56403642555034e-16
AC147651.4	0	1.58337738468625	1.45775765673114	1.71982217398036	1.19640992826728e-27
AC174470.1	4.45661951786747e-10	2.00038392719985	1.70872901124359	2.34182004862623	6.51242454162654e-18
ACAA2	0	1.43821589934205	1.3196545372949	1.56742913744709	1.24371101411658e-16
ACADL	1.8030522408452e-08	1.71384820487486	1.51642324194783	1.93697616081107	6.26129236723515e-18
ACAT2	6.280553854765e-11	0.751445515723515	0.691826487405249	0.81620228970825	1.24123153076975e-11
ACBD4	3.25295346215171e-14	0.663725085704484	0.60716595103073	0.725552855270582	1.88283476180957e-19
ACCS	2.00586258713997e-09	1.38432514688199	1.27147003747082	1.50719722511261	6.60738457680619e-14
ACN9	1.40311096075152e-10	1.3100475245177	1.20169433589445	1.42817059649159	8.72027507065114e-10
ACO2	0	0.743671872198324	0.690090705661544	0.801413276489197	8.32845763991886e-15
ACOT9	0	1.73449942550918	1.55396422318092	1.93600870098115	9.17074156649671e-23
ACP2	4.44089209850063e-15	1.70365612585523	1.47609631010086	1.96629730411407	3.26169233384977e-13
ACP5	1.20738974374035e-11	1.22037180685182	1.15618906274546	1.28811748436913	5.01239985799904e-13
ACSL6	0	0.686403367092757	0.643794859221852	0.731831849241151	1.19786240780813e-30
ACSS3	1.57425628088959e-10	1.41777273304764	1.31637002925064	1.52698669667953	2.97486423800767e-20
ACTA2	1.11022302462516e-16	1.27971540919942	1.2122747767117	1.35090786346691	4.30404695419502e-19
ACTG1	2.44249065417534e-15	1.66695073131272	1.48309064240513	1.87360412180725	1.0366789214152e-17
ACTG2	0	1.29417621117709	1.22986491015551	1.36185043718736	3.54292155837489e-23
ACTL10	2.74225087082414e-13	1.58996256492678	1.38196826696957	1.82926121987736	9.02225552114173e-11
ACTL6A	0	1.86219990603902	1.67780694652186	2.06685786898221	1.48384381741857e-31
ACTL6B	0	0.747320701264156	0.715079233887756	0.781015870788963	2.52799872998211e-38
ACTN1	0	1.45983255468833	1.38072227155132	1.54347556466473	2.05894154746564e-40
ACTN4	0	1.83237283838444	1.6631744466145	2.01878415441246	1.64770227774218e-34
ACTR3	7.88258347483861e-15	1.53451545874274	1.4025156826926	1.67893858313208	1.05001403730522e-20
ACVR1C	5.26245713672324e-14	0.426038383710547	0.335601106069371	0.540846561921569	2.40738545380392e-12
ACVRL1	5.0700554865557e-12	1.43596256163508	1.30754085002937	1.57699736751724	3.74085512069712e-14
AD000671.6	5.22168974725901e-11	2.47990987657595	1.9917062378177	3.08778115927245	4.67397040283568e-16
AD000684.2	5.1017592372915e-09	2.1328566689139	1.71802473894249	2.64785335566858	6.69486001782603e-12
ADAM12	0	1.56913829574696	1.47385661305278	1.67057973575853	4.03307962645491e-45
ADAM19	0	1.63261389652161	1.49903707578274	1.77809353629475	2.18252503817373e-29
ADAM22	0	0.67942079850571	0.625709816938131	0.737742335098732	3.62086025409884e-20
ADAM29	0	0.310088745669469	0.214234725831635	0.448830271645278	5.43297439090559e-10
ADAM32	7.105427357601e-15	1.61940853210522	1.43929687526015	1.82205911715134	1.11640920228254e-15
ADAM9	2.22044604925031e-16	1.45534988410296	1.352691971773	1.56579866618291	8.79384624088986e-24
ADAMDEC1	0	1.4056302708764	1.30416332077213	1.51499158650949	5.24888392482799e-19
ADAMTS1	0	1.46227446812219	1.3644754004096	1.56708330504173	5.37334082689101e-27
ADAMTS14	0	1.42437623123143	1.32560283543538	1.53050943605646	5.05584419880572e-22
ADAMTS15	0	1.35016784288674	1.26010119107418	1.44667207433671	1.54764636792508e-17
ADAMTS19	6.30606677987089e-14	0.590986750572614	0.494808887777581	0.705859065953911	6.48647363850716e-09
ADAMTS19-AS1	6.59261534252664e-12	0.432411498323753	0.308771984282748	0.605559161453497	1.06518072930941e-06
ADAMTS7	0	1.70041825834558	1.57229896009803	1.83897739977817	2.92241997646969e-40
ADAMTSL4	0	1.40182721653371	1.32011350724341	1.48859892291997	2.95942679245821e-28
ADAP1	1.28079769012857e-11	0.821248152879675	0.77584129561854	0.86931249008932	1.15200724641329e-11
ADAP2	7.74691422122942e-12	1.48123749711779	1.350191786487	1.62500212549539	9.34568407908201e-17
ADARB2	0	0.698720926094298	0.656083541836594	0.744129217439916	6.41700157694338e-29
ADAT1	2.90031454408535e-09	1.58855339642945	1.37066700533964	1.84107582912322	7.80438932286421e-10
ADCK1	1.13242748511766e-14	0.679334371203552	0.611302038368298	0.754938081231267	6.89708108422502e-13
ADCK4	0	2.45155145985805	2.13978591294999	2.80874106328067	3.39807279256967e-38
ADCY3	5.57331958361829e-14	1.46621836422009	1.29903372400904	1.6549195389182	5.81356594764933e-10
ADCY5	5.55111512312578e-16	0.644645012780399	0.590495711629586	0.703759882278913	1.03959319548634e-22
ADCYAP1R1	0	0.753772158072146	0.71587686979689	0.793673451757064	6.57232777647697e-27
ADHFE1	0	0.678484178497548	0.628691163165736	0.732220854120924	1.97302001462574e-23
ADIPOR1	2.50750198382832e-10	1.70659894456088	1.49788035779958	1.94440092789174	9.698417109822e-16
ADM	0	1.33926951467239	1.27773396307125	1.40376861284918	4.34910500470285e-34
ADM2	0	1.98251905569316	1.73587968395256	2.26420174308227	5.73501901730382e-24
ADPGK	0	2.28157650246977	1.98610099832091	2.62101038216238	2.12041335077919e-31
ADPRH	0	1.71805086020351	1.56497701316532	1.88609719722075	6.14004383796236e-30
ADPRHL2	0	1.92416768491702	1.71437953166274	2.15962755696693	1.09791053240047e-28
ADRA1A	1.6198153929281e-13	0.568317390768699	0.505054471418985	0.63950459787574	6.30788060877976e-21
ADRBK2	1.65423230669148e-14	0.561494775269122	0.493271411950156	0.639153972876863	2.49696566414338e-18
AEBP1	0	1.26127259856466	1.20670255949563	1.31831042817625	8.14490600303906e-25
AF064860.7	2.99409941284523e-10	1.98599345693259	1.56740760349539	2.51636524040291	1.33586283953959e-08
AF131216.5	0	0.637903645320266	0.587573340599299	0.692545138787001	8.09168333037783e-27
AFAP1L1	0	1.75930782435119	1.61075961182981	1.92155551833536	3.90133422436133e-36
AGA	9.65783009121424e-13	1.46195745557851	1.30521867028619	1.63751841019325	5.25291600389266e-11
AGAP2	7.14650560951213e-13	0.82417215207285	0.776818824103933	0.874412044579281	1.50182297853092e-10
AGAP2-AS1	0	1.35751307532438	1.29188227398624	1.42647808301477	1.20396956989068e-33
AGBL2	1.69864122767649e-14	1.47074304476574	1.35061520300862	1.60155542371234	7.08696644353991e-19
AGBL5	2.88569168560571e-12	1.83581301907367	1.56210222098532	2.15748329125003	1.64932638386991e-13
AGL	3.85027232319146e-10	1.53663490008637	1.33595873130211	1.76745490772911	1.78172247779964e-09
AGPAT6	6.86117829218347e-13	1.56382306414823	1.34934035276254	1.81239860718249	2.83720679754988e-09
AGTR1	1.26887389484409e-12	1.93378562815012	1.62088757714835	2.30708588822609	2.4243447804443e-13
AGTRAP	0	1.50266000638238	1.38743059871451	1.62745949013463	1.46044700583432e-23
AHCY	9.1507135202562e-11	1.48543929966401	1.30813160916538	1.68677975329572	1.05012593497559e-09
AHR	1.11022302462516e-16	1.50618824490731	1.39588752978856	1.62520473941092	4.78903736586646e-26
AIDA	3.48651663095723e-10	1.42933083692005	1.27202830033921	1.60608584009159	1.91669632038289e-09
AIFM3	6.96109836439973e-14	0.826714982047004	0.785219594302566	0.870403217775057	4.39988037592574e-13
AIG1	3.51385587293862e-13	0.815321781643548	0.759390340033245	0.875372746502554	1.79274574359497e-08
AIM1	0	1.57263559728283	1.42348972403788	1.73740820188408	5.30411031072652e-19
AJUBA	0	1.73618837309993	1.57993010733223	1.90790089567774	1.97391187946497e-30
AK2	0	1.98613475853312	1.77858451671819	2.21790487996161	3.72883518656564e-34
AK4	1.55181978378494e-10	1.39097682350865	1.27805743553613	1.51387290566216	2.18017948868053e-14
AKAP12	9.29922805426031e-13	1.29499554503057	1.21380710992305	1.38161446570809	5.05687363032626e-15
AKAP2	0	1.59580017530633	1.46014467363066	1.7440588220451	6.27563563013501e-25
AKAP8	0	1.92350809730454	1.6572253582839	2.23257710962585	7.6693742637186e-18
AKIRIN1	0	1.71299908112991	1.53359915715091	1.91338514909158	1.48570855851818e-21
AKR1B10	1.97619698383278e-14	1.70016422157478	1.42090838965455	2.03430312704799	6.73890112961924e-09
AKR1C1	0	0.70526019370833	0.658988391558109	0.754781035904866	6.41741169569227e-24
AKR1C2	0	0.621733239429085	0.560307544074719	0.689892943792733	3.42266818065421e-19
AKR1C3	0	0.719335306854375	0.681294815142451	0.759499811515646	1.43996118022126e-32
AKT2	0	1.6068985247282	1.44979016059075	1.78103213758983	1.6345649976986e-19
AL009178.1	0	1.60818950175455	1.43353777178033	1.80411951778683	5.49948560031588e-16
AL022344.7	0	0.426472166023414	0.360682820543326	0.504261633860809	2.08192025723028e-23
AL022476.2	5.55111512312578e-15	0.222087021945928	0.151139504797078	0.326338539900819	1.81999674491055e-14
AL031663.2	1.08991704550476e-08	1.83933509313186	1.4914958651587	2.26829565126981	1.21325358062682e-08
AL049840.1	6.16651174567551e-12	1.80515973159627	1.55411980701155	2.09675061206687	1.06632148327575e-14
AL357673.1	0	2.34513611956996	2.0139190565343	2.7308264458135	5.22718814159473e-28
AL512652.1	0	0.410052472832703	0.334111736809436	0.503253887701995	1.44976585466187e-17
AL590822.1	1.01446628875124e-11	2.68359176778861	2.02710729615656	3.55268060541114	5.32956265634835e-12
ALCAM	3.33066907387547e-16	0.75825456504557	0.710720552397516	0.808967720819292	5.3818001175832e-17
ALDH16A1	6.77885414468449e-10	1.23717034872509	1.15604007345347	1.32399430340869	7.74776147096598e-10
ALDH2	0	0.744052957113124	0.704926028230791	0.785351626720658	7.62634182422113e-27
ALDH3A1	1.33648647704376e-12	1.3541413002753	1.25321973394807	1.4631900627151	1.69513614726266e-14
ALDH3A2	1.32079691628206e-09	1.4209908170082	1.262252762664	1.59969141026877	6.11925603325975e-09
ALDH3B1	1.13242748511766e-14	1.55345618597911	1.3999617707097	1.72378001474526	1.05641827360855e-16
ALDH5A1	0	0.582280038736178	0.537620586613328	0.630649294228867	2.90830222230252e-40
ALDOC	0	0.749773489729685	0.720200708453096	0.780560584436084	1.07500826013914e-44
ALG12	1.57545088086408e-10	1.62721006566902	1.44455424292624	1.83296169789435	1.10691279963941e-15
ALG14	7.32747196252603e-14	1.65829650909079	1.46311314719501	1.87951787415398	2.44402734905436e-15
ALG2	0	1.86968606841146	1.66863676108794	2.09495923614479	4.23145237748364e-27
ALG3	5.98410210272959e-14	1.75316826037628	1.53689140648083	1.99988036645264	6.40600124394016e-17
ALG6	0	1.89631729158419	1.68316284500774	2.13646545313604	7.10470239581116e-26
ALOX12B	6.55031584528842e-15	0.347843056877971	0.26067303866396	0.46416304823219	7.25763849078186e-13
ALOX5	0	1.32508829302174	1.24718059097229	1.4078626599973	8.64764886583226e-20
ALOX5AP	2.03170813506404e-14	1.2905811422526	1.22409906857117	1.36067392542191	3.27662819815481e-21
ALPK1	4.47419878923938e-14	1.55005456274795	1.40013158267222	1.71603096254006	3.04700267320949e-17
ALPK3	0	1.64515434534857	1.48464522627426	1.82301655110654	2.00623089734591e-21
ALPL	4.10782519111308e-15	0.75335504160555	0.70079008021536	0.809862803049507	1.65790714408786e-14
AMER2	0	0.695517870782698	0.651103696051239	0.742961699514035	4.06459351178844e-27
AMER2-AS1	0	0.444249411849559	0.362219004989606	0.544856943479105	6.69415337924278e-15
AMER3	0	0.4691671553648	0.419766700210028	0.524381327920875	1.51264285135388e-40
AMIGO2	4.82552886538201e-11	1.43631653799692	1.30885619715234	1.57618934899947	2.22818081768748e-14
AMMECR1	2.72226685638088e-13	1.76492913274231	1.5610594345487	1.99542360442097	1.17499758942592e-19
AMZ1	0	0.504168093738406	0.45674463019692	0.556515501089153	4.73231741986868e-42
ANG	0	1.50058371289352	1.39671461711277	1.61217721344968	1.41200948959374e-28
ANGPT2	0	1.47965316555606	1.39315753238516	1.57151896999885	3.16186254702772e-37
ANK1	0	0.590656823601874	0.535333433023301	0.651697543523813	9.28038250642551e-26
ANK3	2.55378829194797e-09	0.820202229061602	0.763873191299277	0.880685045921518	4.76168287399974e-08
ANKLE2	1.33226762955019e-15	2.12542678722584	1.82895724971388	2.46995331824397	7.81061291003789e-23
ANKRD11	3.20537774101126e-09	1.69723487129917	1.45517873857899	1.97955490413974	1.6033357753295e-11
ANKRD13C	2.45185316494201e-10	1.72009391607064	1.47501481602858	2.0058938038802	4.65026551120517e-12
ANKRD19P	9.87765425009002e-12	0.729773169058672	0.655688119187589	0.812228958697316	8.03289058501013e-09
ANKRD22	2.19824158875781e-14	1.35523206117847	1.25047925679978	1.46876002113493	1.3024131610683e-13
ANKRD24	0	0.689693922479112	0.639787668457203	0.743493083965939	3.19352471809289e-22
ANKRD27	2.07902361992751e-10	1.68306898951495	1.48302888524067	1.91009173972169	7.36597855083212e-16
ANKRD29	2.22638574243206e-11	0.661607501466856	0.593176318657683	0.737933178094089	1.21190024746869e-13
ANKRD32	2.03725925018716e-13	1.71430192582595	1.49304966939272	1.96834114305514	2.08867433826709e-14
ANKRD35	8.26614665605518e-09	1.31665348821841	1.21354375309771	1.42852402611159	3.79968018103127e-11
ANKRD46	0	0.679941025876181	0.623064133389688	0.742009969590725	4.9374897121222e-18
ANKRD52	4.88498130835069e-15	1.75560032578621	1.56619119516631	1.96791586711312	4.35947740479729e-22
ANKRD53	4.44089209850063e-15	1.68770317923949	1.52252393215574	1.87080279072009	2.30020754991087e-23
ANKRD55	3.58479912421217e-12	0.473632829401197	0.386888649084551	0.579825894653112	4.46943529051091e-13
ANKUB1	8.67683516148077e-08	1.43207046330313	1.24100888912103	1.6525472378508	8.86134575431937e-07
ANO1	2.04733563435866e-10	1.50087349625962	1.34679891189843	1.67257430331548	2.02209240211995e-13
ANO4	4.15331502523486e-09	0.717816339875132	0.644555191580391	0.799404464539893	1.57852057537958e-09
ANO5	1.11022302462516e-16	0.553276906255586	0.4874951849249	0.627935094462337	4.9521677753194e-20
ANO6	0	1.59416214098568	1.46211912175425	1.73812987870848	4.04052651390693e-26
ANP32E	4.10738998368743e-10	1.29764089020543	1.19393626895463	1.41035323552695	8.73312290012246e-10
ANPEP	2.22044604925031e-16	1.37989216144529	1.29242021395073	1.47328427446798	5.57636720639655e-22
ANTXR2	0	1.65804920127064	1.52324998185294	1.80477740790128	1.47838013502163e-31
ANXA1	0	1.34091805029565	1.29044508646925	1.39336515475317	9.0942385355905e-51
ANXA2	0	1.36865646354641	1.30959842592195	1.43037779988827	3.38066088186342e-44
ANXA2P2	0	1.9685577774554	1.75442090853333	2.2088312470123	9.63533010888931e-31
ANXA2R	8.06066324798849e-12	1.58633967520351	1.43241169231039	1.75680886901019	7.96862029336911e-19
ANXA5	0	1.50196945684513	1.4003905904134	1.61091645769322	4.94865067374489e-30
AOX1	0	1.79880356195409	1.58571282075803	2.04052979337831	7.07604222747245e-20
AP000330.8	0	2.58589445736963	2.22572805904644	3.00434283401172	2.1646223852427e-35
AP000695.6	4.44089209850063e-16	2.02019930036975	1.64486853602032	2.48117410227124	2.00587594128793e-11
AP000783.1	3.20743431814208e-13	0.577961003637851	0.491613342722961	0.679474889505416	3.12319609066564e-11
AP001007.1	4.32209823486573e-13	1.36850800734734	1.26217188474965	1.48380279168177	2.9220297464911e-14
AP001046.5	0	2.8723129958272	2.32454726088763	3.54915646793411	1.46343428999369e-22
AP001469.9	2.66453525910038e-15	0.553276636234621	0.479519696858412	0.63837844036151	5.12824869510188e-16
AP1M1	2.05391259555654e-14	1.52078482567502	1.33112351704693	1.73746948076937	6.89245691218808e-10
AP1S2	0	1.49336165737878	1.36818043038175	1.62999630034676	2.75799241037186e-19
AP3B2	0	0.716415296446726	0.672556292347895	0.763134451082289	4.33580680721271e-25
AP5S1	4.53970194769227e-13	1.77863887737029	1.48883261269476	2.12485690407269	2.21247478259069e-10
APBB1	0	0.680267049287472	0.630540772118521	0.733914885141321	2.57779540276737e-23
APC2	2.76233369511658e-10	0.741991626120405	0.690554387201585	0.797260264269506	3.91507243410983e-16
APCDD1L	3.97593069578761e-12	1.26243439585841	1.14952112507682	1.38643872572581	1.08905847172876e-06
APCDD1L-AS1	7.45337125351853e-12	1.3618103070834	1.24817032721393	1.48579666736521	3.75232905809517e-12
APEX2	0	2.09474105347921	1.82465737244829	2.40480220965733	8.73128477596988e-26
APH1A	5.88312731863994e-11	1.58613299595963	1.38956972789356	1.81050135906859	8.27611657340862e-12
APIP	1.32508448658086e-11	1.27466465255177	1.17595959872329	1.38165458934891	3.60282997974493e-09
APITD1	0	1.68516638385046	1.52462232238856	1.86261587513075	1.67548111415918e-24
APLN	0	1.35046804273009	1.27250945114907	1.43320266327955	4.01404069495998e-23
APOBEC3B	2.76334510829201e-13	1.65509518808366	1.49326991537275	1.83445742354884	8.147915689198e-22
APOBEC3C	0	1.56016472057243	1.44354153163977	1.68620985400666	3.21886326935283e-29
APOBEC3D	0	2.25953059013309	1.93809803015795	2.63427257460816	2.19221866951114e-25
APOBEC3F	0	1.59783302413439	1.45244073608269	1.75777937756014	6.09384051858082e-22
APOBEC3G	0	1.62099896167594	1.49501076482861	1.75760449059758	1.25454659948052e-31
APOBR	0	1.60371294577839	1.46458853526259	1.75605308285175	1.95772482575752e-24
APOL1	2.77555756156289e-15	1.36244645710609	1.26758632455311	1.46440547087423	4.47775783856399e-17
APOL2	5.78426195829707e-14	1.48304851919155	1.34458810764085	1.6357670410571	3.25079533453665e-15
APOL4	0	1.47812985061323	1.39153059238924	1.57011844886751	7.05059658970226e-37
APOL6	4.37427871702312e-14	1.55549853347057	1.40340904701191	1.72407017952519	3.90618950817139e-17
AQP3	5.93782356617112e-09	1.3336661056246	1.20822533053548	1.47213043489463	1.10928097714343e-08
AQP7	2.22044604925031e-16	0.178354558954042	0.118447015653884	0.268561841968602	1.51570512972414e-16
AR	1.41802760644794e-08	1.42739472254977	1.28106939219022	1.59043351311325	1.12874286189543e-10
ARAF	2.08672457091552e-09	1.16014219656391	1.07231098611105	1.25516751546994	0.00021722168561641
ARAP3	0	1.68430140431881	1.57175676948225	1.80490472550967	2.10751202490259e-49
ARC	1.01030295240889e-14	1.25555894965596	1.19282685764728	1.32159019220149	3.24376371961954e-18
ARCN1	3.35542704732461e-10	1.59259695189389	1.38307179339324	1.83386362392581	1.00570118292406e-10
ARF4	2.22044604925031e-16	1.51279795011851	1.38243104558844	1.65545879860404	2.19137487726664e-19
ARF6	0	1.61151780546728	1.45733281060004	1.78201548640685	1.40956230893354e-20
ARFGAP2	6.66133814775094e-16	0.570033253364693	0.49811876078965	0.652330198176884	3.11369081476764e-16
ARHGAP11A	0	1.71730584115263	1.58422934066782	1.8615608714921	1.93929827221271e-39
ARHGAP11B	0	1.85253755204276	1.68293663940157	2.0392302962451	2.53134778656099e-36
ARHGAP15	2.53297205432546e-09	1.37856279905482	1.25780898964093	1.51090937224131	6.69301766716737e-12
ARHGAP17	1.52278190057586e-12	1.54445882177791	1.35150899989644	1.76495535904711	1.72621724420916e-10
ARHGAP18	0	1.70462373173399	1.54903372926067	1.87584170176692	9.09223128927069e-28
ARHGAP25	0	1.63228011106854	1.46861369362435	1.81418597181583	9.99154046709569e-20
ARHGAP27	3.43614026121486e-13	1.57480741049004	1.40533330166164	1.76471900096725	5.38993276047464e-15
ARHGAP29	1.62333479991617e-11	1.49596416439575	1.36136651934246	1.64386941309325	5.6200686288948e-17
ARHGAP30	2.27591168133756e-10	1.45566803058827	1.32519028688809	1.59899256449627	4.64027535673031e-15
ARHGAP31	1.9835244557953e-12	0.729350845373418	0.656490040516408	0.810298135259562	4.17129792010106e-09
ARHGAP36	1.42520439894156e-11	0.777408667182036	0.716500834524412	0.843494112900658	1.45977250933991e-09
ARHGAP44	0	0.620454732468135	0.565906949568525	0.680260377321077	2.81525341189563e-24
ARHGAP9	1.3966812151267e-09	1.33583495680523	1.22915258758281	1.45177665478624	9.19496211632436e-12
ARHGDIB	0	1.38684817461332	1.29548075807523	1.48465953464715	5.19830326500944e-21
ARHGDIG	0	0.783819873584515	0.7505017719814	0.818617113460021	4.24199471375443e-28
ARHGEF1	2.67297295408753e-11	1.32821971340692	1.22943127848838	1.43494609088834	6.1116035508931e-13
ARHGEF19	0	1.61587008095262	1.46251469757327	1.7853059000708	4.01897219031957e-21
ARHGEF26-AS1	3.33066907387547e-16	0.660140613587916	0.610638576002351	0.713655584226555	1.58366785826441e-25
ARHGEF35	3.606513310217e-09	1.35632292812834	1.16584679492659	1.57791906567146	7.90175933722211e-05
ARHGEF39	0	1.7952970922484	1.61269286071172	1.9985774898347	1.10572199640718e-26
ARHGEF4	2.22044604925031e-16	0.757630669108104	0.703711951369605	0.815680662600705	1.72338591417912e-13
ARID5A	0	1.56025654608809	1.43643172084488	1.69475545150094	5.39637759529037e-26
ARL1	2.11497486191092e-13	1.45121956267919	1.31101222246773	1.60642149860248	6.78451916500141e-13
ARL11	8.88178419700125e-16	2.13480672675659	1.80500904738423	2.52486255800747	8.17926909242416e-19
ARL13B	4.6074255521944e-14	1.70553043456717	1.51957159144737	1.91424614648412	1.26153420592485e-19
ARL2BP	4.15749268345422e-09	1.37837855774254	1.249962886964	1.51998708782394	1.2630162119193e-10
ARL3	0	0.679667142083192	0.631521031040162	0.731483832401705	6.96361332192574e-25
ARL4C	0	1.51645848113945	1.41541516308806	1.6247150553358	2.57102828347064e-32
ARL9	4.10782519111308e-15	1.69998698289363	1.50858446419315	1.91567380587699	3.13030360493155e-18
ARMC10	2.53997933796768e-11	1.49812300979975	1.3364871481415	1.6793072463229	3.94183488390436e-12
ARMCX2	2.22044604925031e-16	1.50214642440747	1.36998551899895	1.64705673824124	4.73651727991379e-18
ARMCX6	8.99280649946377e-15	1.47659506505165	1.34685933774528	1.61882753828243	9.87420813009188e-17
ARNTL2	1.30218058558285e-12	1.68496160464273	1.50320374070623	1.88869647689032	3.28160078481681e-19
ARPC1B	0	1.41332488435815	1.31600302393137	1.51784395052434	2.02835565221082e-21
ARPC2	5.55111512312578e-16	1.41363794814327	1.27532154152736	1.56695561343486	4.42315309904829e-11
ARPC3	4.96269692007445e-13	1.3019057906886	1.19441810238162	1.41906647634427	1.96257936267643e-09
ARPC5	0	1.58752988702518	1.44984115858304	1.73829465888613	1.78033959678529e-23
ARPP21	0	0.667105747811565	0.630426396400315	0.70591917042864	1.02670573910128e-44
ARRB1	0	0.625232258683587	0.571791983695904	0.683667117492295	6.90149404678972e-25
ARRDC3	1.32893696047631e-13	1.56942363475226	1.43586714534169	1.71540281655576	3.01273344474779e-23
ARSD	4.44089209850063e-15	1.64710187466021	1.47944063997858	1.8337637294785	8.1902477258884e-20
ARSK	2.77555756156289e-15	2.1337182915138	1.81777309509082	2.50457758442788	1.87938785082608e-20
ARTN	3.78530819911127e-07	1.31440279949181	1.19730216293982	1.44295631695	9.34195446894774e-09
AS3MT	7.3693273705544e-12	0.707487320040548	0.638844911502949	0.783505196653424	3.02372386076466e-11
ASAP3	1.11022302462516e-16	1.54409743016624	1.40633022165897	1.69536061810109	8.15537598353738e-20
ASB13	1.11022302462516e-16	0.74947006073578	0.703950824046491	0.797932686136323	1.86509624301248e-19
ASB5	2.88657986402541e-15	1.61039123648019	1.44018760488647	1.80070980039899	6.25539595882938e-17
ASB6	4.66293670342566e-15	2.17869822085469	1.82317203931863	2.60355349642669	1.05856437463673e-17
ASB9	1.58342228218089e-11	2.07464851862637	1.74648045618845	2.46448018389628	9.81988711912142e-17
ASCL5	8.23086043766352e-12	0.509699353105096	0.418333507307233	0.621019894456975	2.28399140135104e-11
ASF1B	0	1.5892790235335	1.4888369213076	1.69649729832415	5.63283839753734e-44
ASIC1	0	0.691747477916115	0.651986530792134	0.733933218868698	3.03828166793806e-34
ASIC2	0	0.633869251649585	0.568474248402545	0.706787034445035	2.2784106877348e-16
ASIC4	0	0.799148713991696	0.765284319735226	0.834511632611967	3.35401544061129e-24
ASPDH	5.55111512312578e-16	0.758726043625979	0.716743609179562	0.803167550995369	1.95858652568578e-21
ASPHD1	1.11022302462516e-16	0.763334140726989	0.72402057580995	0.80478239136723	1.37294479264879e-23
ASPM	0	1.83896058743669	1.70018230332785	1.98906672274273	2.72293754245433e-52
ASPN	5.55111512312578e-16	1.47245231947965	1.34382535410188	1.61339107535296	1.07293478704439e-16
ASTE1	2.18951012875834e-09	1.74545317204127	1.4608792598087	2.08546103679223	8.5621847469123e-10
ASTN2	9.2148511043888e-15	0.689747144301808	0.635656653980382	0.748440404255064	4.91445985959849e-19
ATAD2	3.10862446895044e-15	1.61076748145206	1.46206972204879	1.77458833882945	5.08723027955308e-22
ATAD3A	1.27995392062985e-10	1.45646165673704	1.32113160091177	1.60565424071397	4.12559056482115e-14
ATAT1	1.40786826641204e-10	0.85140754934783	0.797432437364229	0.909036027531672	1.47925677426911e-06
ATCAY	0	0.76724192685323	0.733786381930488	0.802222811457438	2.3604869870585e-31
ATE1	2.10320538762687e-10	0.63266801575931	0.558018725733863	0.717303559371453	8.88978198173563e-13
ATF3	0	1.32289102114717	1.25004547826773	1.39998158807545	3.56408674446784e-22
ATF5	0	1.56581796436411	1.44932692897738	1.69167207791778	6.02249970456109e-30
ATG4A	0	1.96660487965636	1.68005640917279	2.30202672456246	3.85814813931394e-17
ATG4C	3.10862446895044e-15	1.69781447961324	1.50064330344375	1.92089219374738	4.30498389174043e-17
ATL3	0	1.85598538858796	1.63787443265725	2.10314154367953	3.15690017035582e-22
ATOH8	0	0.675622212335979	0.639143499320076	0.714182924941509	1.3381175195025e-43
ATP11C	5.92702553703361e-10	1.64178693831072	1.4340799006024	1.87957752540527	6.76988314000662e-13
ATP1A1	2.22044604925031e-16	1.36356528973612	1.25568350733995	1.48071571260177	1.65508714988329e-13
ATP1A3	5.55111512312578e-16	0.798227475194475	0.762388178300515	0.835751550575841	6.89762067532927e-22
ATP1B3	1.52343693216039e-11	1.31440808122158	1.20598457172466	1.43257935838259	4.84543919606281e-10
ATP2B3	5.55111512312578e-16	0.695000678134717	0.63292097613336	0.763169433186775	2.50841448118587e-14
ATP5F1	0	1.3157348072333	1.20695422077465	1.43431958989642	4.60085413763794e-10
ATP5F1P5	1.13242748511766e-14	1.99231852172289	1.68016505732883	2.36246616050368	2.22550467823002e-15
ATP5SL	0	1.73388306501833	1.52480772782621	1.97162594882913	4.66635187913251e-17
ATP6V0A1	0	0.709469140984537	0.660984152473822	0.761510635505397	2.02701160132472e-21
ATP6V1G2	0	0.761138561801773	0.725333388263693	0.798711212851347	1.22290802923179e-28
ATP7A	0	2.52566758982727	2.09708189341497	3.04184438115389	1.58847435460648e-22
ATP8A1	2.22044604925031e-16	0.720709234238848	0.672470318248203	0.772408515620807	1.93301406778192e-20
ATP8A2	0	0.638802876757756	0.571882225229341	0.713554465152922	2.06449817899773e-15
ATP8B2	1.98296934428299e-12	1.71574418279693	1.51699571782688	1.94053158239531	8.38156101365725e-18
ATP9A	0	0.594764988497174	0.545897634338502	0.648006822690665	1.53648821010105e-32
ATRNL1	3.60267371490863e-13	0.756451084120298	0.706111813260542	0.810379081500563	1.95710631596113e-15
AUNIP	2.60902410786912e-14	2.30656054248395	1.94417306156741	2.73649586104986	9.3621931941457e-22
AURKA	0	1.79350659314908	1.66489002791909	1.93205908241859	2.01973669579533e-53
AURKB	0	1.46835835798415	1.38837002767669	1.55295506563903	3.4618220745846e-41
AVIL	0	1.41911170220544	1.34405069998978	1.49836462519734	1.54964025741287e-36
AVPI1	2.10187423022035e-12	0.690152362207887	0.626062240234457	0.760803403320972	8.81013667696114e-14
B2M	0	1.23241125296614	1.16201429366294	1.3070729893088	3.31839604554772e-12
B3GAT1	2.67563748934663e-14	0.759498923764502	0.711981872710115	0.810187221486041	7.08591200759741e-17
B3GNT1	0	0.71065932820555	0.658034826853175	0.767492327390524	3.27645393256557e-18
B3GNT2	3.4773903756502e-09	1.42954536437182	1.27234742904185	1.60616503177587	1.82759086879732e-09
B3GNT5	0	1.6266372667881	1.48868118876267	1.77737773384713	5.34652249675354e-27
B3GNT7	0	1.43928742516744	1.34154943667376	1.54414607141227	3.34284488382714e-24
B3GNT8	2.35367281220533e-14	1.62502954783633	1.42454598212254	1.8537281804035	4.93398762819398e-13
B4GALT1	6.57196519426861e-12	1.44758541388909	1.32225284529896	1.58479789849168	1.18907899247297e-15
B4GALT3	5.54789547635437e-12	1.46613968869657	1.2959212821179	1.65871617082967	1.22588786826865e-09
B4GALT5	0	1.5541505655366	1.42300427310005	1.69738350475628	1.09482574556193e-22
B9D2	4.11257694565847e-11	1.50895273836476	1.36668128304644	1.66603464528544	3.87050343934162e-16
BACE2	0	1.68722177837667	1.56428826383474	1.81981633132631	7.73216336041053e-42
BAG1	3.04223313207785e-12	0.829265663104177	0.779321975719791	0.882410045435276	3.47945059128647e-09
BAI3	0	0.693315838087731	0.644897193307864	0.745369736961811	3.54241595620042e-23
BAIAP2-AS1	2.22044604925031e-16	0.642389489474508	0.57647430547192	0.71584154275445	1.12932749461561e-15
BAK1	0	2.24604955027085	1.90936965739675	2.64209633934893	1.57992832268891e-22
BANK1	3.79681963647016e-09	1.88069906751409	1.61672146285263	2.18777882512146	2.71219213773162e-16
BARD1	0	1.61653354059861	1.47427463261787	1.77251960392215	1.63271173774262e-24
BARX1	4.44089209850063e-16	1.43199648007715	1.34201891806875	1.52800671536308	2.11242925794857e-27
BATF	3.35287353436797e-14	1.35079148325412	1.25782554421547	1.45062853876919	1.39745073366252e-16
BAZ1A	1.42736933383958e-11	1.54833977709421	1.40315662780583	1.70854487505146	3.23908476220037e-18
BAZ1B	1.11022302462516e-15	2.10263258498159	1.82619179219697	2.42091975569974	4.95546592640924e-25
BBS12	2.96108138009288e-09	1.99078214606377	1.64066981170853	2.4156070434179	3.01806151465058e-12
BBS5	1.47478695922132e-11	1.40040803114179	1.2363846249778	1.58619139551467	1.1676258083465e-07
BBS9	0	1.55843145032093	1.39670834049535	1.7388802765279	2.07031662595728e-15
BCAP29	1.15242777543045e-08	1.22340246404207	1.13062398853872	1.32379429783606	5.41459822016925e-07
BCAS2	2.22044604925031e-16	1.34892936744033	1.2377979034307	1.47003839100043	8.90425638590411e-12
BCAT1	0	1.55195672235299	1.46381547709101	1.64540524796411	3.96183308279306e-49
BCL10	0	2.37099381965282	2.05238714039202	2.73906008383881	9.43475610794972e-32
BCL2A1	0	1.30906759703669	1.23715303445306	1.38516248668379	9.44804474431323e-21
BCL2L12	0	1.65879383078887	1.53393066224848	1.79382095995776	8.12364498545841e-37
BCL3	0	1.42809738660294	1.34345991731002	1.51806698461514	2.90216555583568e-30
BCL6B	4.28498236892949e-10	1.44524558862291	1.31618768487889	1.58695817886046	1.19426906310979e-14
BCORL1	2.77511347235304e-12	1.68567949394841	1.4719442795698	1.93045035451249	4.41004500245915e-14
BCR	0	0.61472365877882	0.562273028783953	0.672067051623808	1.0941963845488e-26
BCRP2	1.11022302462516e-16	0.716423657414763	0.66904126942081	0.767161728824111	1.27015649612599e-21
BDKRB2	0	1.64708242907281	1.47953284392265	1.83360615433707	7.74374254147242e-20
BEST4	7.58139107048805e-11	1.4170038395683	1.2897215377692	1.55684760047066	3.92112517913567e-13
BET1	2.45678255517134e-10	1.49839908454813	1.34824829718234	1.66527176134161	6.07963251072052e-14
BEX1	0	0.826919522668883	0.794997865424407	0.860122934551391	3.03026413121441e-21
BEX2	0	0.814322027467323	0.777385832243542	0.853013184591647	4.22279197691162e-18
BEX4	5.72342173654761e-12	0.825925233343676	0.777733515362111	0.877103117712752	4.52019424044314e-10
BFAR	1.62092561595273e-14	1.78180316506707	1.53882871859888	2.0631422332264	1.14228169805136e-14
BGN	0	1.28534211386832	1.22291458559156	1.35095645202754	4.98710722906513e-23
BHLHE40	4.31612634521628e-10	1.28870875097112	1.20379035347841	1.37961750568167	3.0327889878964e-13
BICC1	5.65825386544816e-10	1.62227436420492	1.40206577458541	1.87706893675134	8.01297109683297e-11
BICD1	0	1.65606601235605	1.52432930327423	1.7991877682794	8.48621558449844e-33
BID	1.11022302462516e-16	0.774500940459319	0.722300454399063	0.830473943521789	7.09021048799844e-13
BIN2	1.17823693024377e-08	1.3632111540578	1.24037832708164	1.49820793380024	1.26558688713909e-10
BIN3	1.11022302462516e-16	1.95931287699892	1.68674375655813	2.27592776617547	1.36223042876908e-18
BIRC2	1.11022302462516e-16	1.66419905844031	1.46031729061649	1.89654571914602	2.19525255652186e-14
BIRC3	3.99014155050281e-13	1.41616810356787	1.30313380161501	1.5390070421606	2.43280535130674e-16
BIRC5	0	1.48521567739984	1.40199913782906	1.57337158695402	3.26824493039492e-41
BLCAP	1.70445879632553e-11	0.801232991049428	0.743150665465588	0.863854849061882	7.84926066446596e-09
BLK	1.04372066545011e-12	0.520117793411918	0.418331611630641	0.646670037602934	4.02632482495511e-09
BLOC1S3	2.78999046088302e-13	1.87646178493959	1.57874074713364	2.23032745353005	9.30631909182014e-13
BLOC1S5	3.06142888817362e-11	1.78196179105859	1.52139939363115	2.08714939554037	7.91405991451629e-13
BMF	1.66533453693773e-15	1.50187122051178	1.36201560609388	1.65608760495074	3.48568902106234e-16
BMP1	0	1.69211866331735	1.53281187218478	1.86798238107706	1.88511884301483e-25
BMP2	0	0.71587441203791	0.674237320064037	0.760082775842118	8.03711363102303e-28
BMP8B	1.12132525487141e-14	1.44951154984716	1.33618780526429	1.57244642172492	3.9698164253132e-19
BOLA3	2.22044604925031e-15	1.26814938489016	1.17456711421711	1.36918771429184	1.24968868538277e-09
BORA	0	2.04375358015076	1.80768452739192	2.31065135154164	3.56334775605938e-30
BPI	8.80874262421116e-11	0.666502821383502	0.589404959529855	0.753685566654393	9.89788355651601e-11
BRCA1	0	2.2168621884577	1.97843068272782	2.48402837942114	8.56280781037295e-43
BRCA2	0	1.81418477988547	1.61198570262909	2.04174665457651	5.12142244541668e-23
BRD4	1.36952005291846e-10	1.51751433475905	1.35633001726439	1.69785356578916	3.34486208269597e-13
BRINP1	0	0.654638125683954	0.614295677589219	0.697629970767226	5.94629163490287e-39
BRINP2	2.22044604925031e-16	0.726672291612468	0.675292181628999	0.781961695637436	1.41754064298652e-17
BRIP1	0	1.6987393611548	1.57331325640545	1.83416456029208	9.07227905525533e-42
BRIX1	3.43947093028873e-12	1.49181229496239	1.32349581227272	1.68153454114772	5.80693962285132e-11
BRPF1	1.11022302462516e-15	1.94657040055124	1.70359754795469	2.22419686436588	1.22450417987849e-22
BRSK2	0	0.746088796499032	0.702878118120649	0.791955927934898	6.41957761757511e-22
BSN	0	0.596590500285958	0.538450507676259	0.66100824487558	5.43113753294474e-23
BSN-AS2	8.38884517406768e-13	0.262839234314642	0.180884798705604	0.381925200953702	2.40992557382061e-12
BSPRY	9.96303040068369e-12	0.474480395846229	0.388803363360186	0.579037290461484	2.17753612289828e-13
BST1	0	1.77971441162521	1.62642852737086	1.94744701881649	4.26742472365158e-36
BST2	1.3855583347322e-13	1.28026874788766	1.20653142989011	1.3585125312211	3.26064294343411e-16
BTBD17	0	0.785743822238182	0.7519130011379	0.821096793447036	6.72603066340979e-27
BTBD19	0	1.63639234489612	1.5111356822333	1.77203141843435	8.12013626069765e-34
BTG1	8.8307139378685e-13	1.31139422329409	1.20487127832643	1.42733488616132	3.57082190298799e-10
BTG3	0	1.50097890918523	1.38424097960757	1.62756176056686	8.27575920745409e-23
BTN2A1	0	1.75631209305429	1.54548886055016	1.99589414517727	6.00479905369666e-18
BTN2A2	0	1.70511059849255	1.56758401518771	1.85470260280976	1.64235219110696e-35
BTN2A3P	0	2.12542137595946	1.87823687181482	2.40513648367498	6.30744812480361e-33
BTN3A1	2.2037371927297e-11	1.41088331264864	1.28532742802988	1.54870399440673	4.53502954032131e-13
BTN3A2	0	1.42367294299567	1.31522122224818	1.54106747544217	2.37792057175157e-18
BTNL9	4.44089209850063e-16	0.656529258828062	0.601274421381504	0.716861806139992	6.54132130134075e-21
BUB1	0	1.68710081420166	1.56867288215283	1.81446953642346	4.73784911801746e-45
BUB1B	0	1.55821562154575	1.45487456118067	1.66889709120956	8.85252221433084e-37
BVES	1.11022302462516e-16	1.70452887872173	1.54042642044711	1.88611326047826	5.41381333252442e-25
BZRAP1	0	0.726286611627909	0.684302827324981	0.770846211891272	6.49186137781199e-26
BZW1	2.99760216648792e-15	1.63314090793746	1.46483719928305	1.82078201351262	9.63096991334868e-19
BZW2	1.18332010856648e-10	1.42695519034962	1.2882169294644	1.58063527088743	9.56417212162616e-12
C10orf10	0	1.42859741539938	1.34384962203455	1.51868969698851	2.90230042325554e-30
C10orf11	1.72567238276855e-09	1.35604673435412	1.23291208508745	1.49147921250365	3.59046180677552e-10
C10orf32	0	0.753572857071332	0.70112512369106	0.809943948271458	1.50679574707804e-14
C10orf55	0	1.39017091859996	1.246418493909	1.55050265409665	3.31365749229987e-09
C10orf85	1.01363362148277e-13	0.603259098884128	0.53576819249599	0.679251858329038	6.87761044413016e-17
C11orf21	3.07774916663561e-11	1.7131062636326	1.47528643018928	1.98926324437263	1.67267662354435e-12
C11orf63	3.33066907387547e-16	1.80371912844623	1.62296838932749	2.00460016086386	6.76185290157806e-28
C11orf82	0	2.02237434826098	1.80686544256436	2.26358748590562	1.67368498716828e-34
C11orf84	0	1.77678205971236	1.57504731634768	2.00435533266151	8.94102144655884e-21
C11orf89	0	1.3763355182266	1.21119168095168	1.56399642478031	9.68202194255246e-07
C12orf39	9.99200722162641e-16	0.782010004169968	0.734598607216272	0.832481358682825	1.30270676820652e-14
C12orf5	0	1.62818495227632	1.4788383704453	1.79261391359544	3.06319532298735e-23
C12orf55	2.16763273996889e-11	1.72706556513105	1.50746010118294	1.97866296024735	3.40944367814148e-15
C12orf76	2.66856536867977e-10	0.815539027444746	0.754125763442549	0.88195356468045	3.31301861089754e-07
C14orf119	0	1.48122478176588	1.32703812231618	1.65332616842083	2.46643304330155e-12
C14orf132	0	0.674765754864261	0.634106556132274	0.718032039780014	2.41776689555621e-35
C14orf142	9.58788604066285e-13	1.46236239732652	1.30319195378607	1.64097374519673	1.01963906987096e-10
C15orf26	1.10930920005359e-09	1.52086645966396	1.3461037923589	1.71831830595875	1.67095507929427e-11
C15orf41	9.84223813560448e-12	1.79013780922958	1.53763657507141	2.08410324519269	6.09160855028201e-14
C15orf48	0	1.3459098893774	1.26277170169063	1.43452171750336	6.74438962736847e-20
C15orf59	0	0.730448403472658	0.692301292952362	0.770697491926351	1.71320673652173e-30
C15orf65	6.86117829218347e-14	1.56741282644318	1.39495806595722	1.76118768617803	4.1246384447004e-14
C16orf54	5.49014722572849e-10	1.43350215287143	1.24001728523716	1.65717723998824	1.12785865917481e-06
C16orf86	1.48769885299771e-14	0.655235988419827	0.595575844875417	0.720872419885189	3.97853986086445e-18
C16orf92	3.93796106834543e-13	0.675308376041689	0.600401747527984	0.759560418719148	5.96457660971203e-11
C16orf96	1.99840144432528e-15	0.241934578658127	0.161859501025027	0.361624371629784	4.52075240073473e-12
C17orf102	3.17204040811703e-11	0.260390813058698	0.181884831663115	0.372781913177644	1.98128584857016e-13
C17orf53	2.04836148043341e-13	1.68919508555936	1.48704695557333	1.91882309188937	7.53764896101522e-16
C17orf58	5.84829962235744e-11	1.36981414438387	1.22995433831389	1.52557760211358	1.02416871661356e-08
C17orf72	2.46158093908377e-10	1.31098924257761	1.21126829374195	1.41891998910058	1.96863202379901e-11
C17orf96	0	0.681946218975058	0.629594864214303	0.738650633935417	5.81482656861113e-21
C18orf32	0	0.866159906999945	0.826148679664134	0.908108919086037	2.60798170730081e-09
C18orf54	2.58810750608518e-11	1.89370703651983	1.62386435494227	2.2083903309105	3.91776932985478e-16
C19orf12	1.55297996684567e-12	1.74343627652313	1.51563446549032	2.00547699297239	7.22148012369175e-15
C19orf40	0	2.55080496546357	2.22547998106958	2.92368658769353	3.00076634452084e-41
C19orf52	1.05373942904663e-09	2.25217703439728	1.84515128765145	2.74898943420659	1.42877876472654e-15
C19orf55	0	1.84804909108448	1.68187849555776	2.03063744026619	2.25431763038635e-37
C19orf69	1.39332989590457e-13	2.41048822650955	1.82264422116439	3.18792522570815	6.88082187883653e-10
C1GALT1C1	4.13002965160558e-14	1.54759184505051	1.36956624473454	1.74875843214949	2.48965045500671e-12
C1QA	1.84219306476052e-12	1.2422054760067	1.17625618443277	1.311852354141	6.57053352607131e-15
C1QB	1.37090339080714e-12	1.24477914358652	1.17843793459575	1.31485508979266	4.66120713641439e-15
C1QC	0	1.29791372849067	1.22571025304074	1.37437052714982	4.29783936540587e-19
C1QTNF4	0	0.765012888992741	0.72755312632524	0.804401354552624	1.36083528573354e-25
C1QTNF6	0	1.58383841007167	1.44802869622133	1.73238563280166	8.8519557979825e-24
C1QTNF9B-AS1	9.20324927378147e-10	1.57658887512845	1.37126893433066	1.81265134719328	1.60360460484656e-10
C1R	0	1.30744809520988	1.24942806554362	1.36816241671679	5.49284330663467e-31
C1RL	0	1.49005280881564	1.39566906304219	1.5908193653156	6.89045635227648e-33
C1RL-AS1	2.64455124465712e-13	1.61910597263328	1.44418771601379	1.81521011538069	1.44459497700405e-16
C1S	0	1.30354658038623	1.23432128670619	1.37665428404874	1.70683569826084e-21
C1orf109	1.6769918786963e-12	1.59464310833165	1.4504323424849	1.75319218171398	4.96116916668234e-22
C1orf112	0	1.79983234352614	1.58679534935689	2.04147085893318	6.05205264610572e-20
C1orf123	8.85121198557215e-10	1.30072300427129	1.18026747632639	1.43347196103933	1.14088068074193e-07
C1orf131	7.39341921018877e-12	1.53227300290788	1.36702982983705	1.71749036063112	2.30469077177764e-13
C1orf162	1.14132668871392e-08	1.24367739818012	1.16538701993354	1.32722730242207	4.90978187296934e-11
C1orf174	0	2.03126506338583	1.76755929545489	2.33431363142472	1.71727712688919e-23
C1orf226	7.6003647819789e-12	1.36216287820724	1.25792656205541	1.47503659015995	2.75459449390776e-14
C1orf53	1.25399653994052e-08	1.32478483758402	1.21138142414634	1.44880450608634	7.27976856127687e-10
C1orf54	0	1.40180006986774	1.29652714313976	1.51562074598957	2.2578993007704e-17
C1orf63	1.88883353402503e-11	1.51668886146456	1.38019088003945	1.66668620678389	4.86119996864817e-18
C1orf74	5.31654720248298e-11	1.98196159329378	1.62461182761683	2.41791404599948	1.54317300516786e-11
C1orf85	0	1.47728932977241	1.36860488061307	1.59460469180982	1.40303240024878e-23
C1orf86	7.19602155641041e-11	1.15352263608416	1.08807271561851	1.22290951042015	1.64979510768904e-06
C1orf87	6.74479139206596e-10	1.44485991882724	1.2815006539916	1.62904340199202	1.83553458296491e-09
C2	0	1.39608313386707	1.31383040461717	1.48348531881938	4.7803395075728e-27
C20orf195	1.91213711531191e-12	1.75042669725279	1.52572487822754	2.00822157793927	1.38498702805364e-15
C20orf201	1.11022302462516e-16	0.701244284351332	0.649328970975195	0.75731034393381	1.51880967054005e-19
C20orf203	0	0.353145961506794	0.274707153269399	0.453981880865897	4.58185369614742e-16
C20orf24	1.66044955562938e-12	1.38906077901086	1.2477251024436	1.54640621079713	1.94354061182215e-09
C20orf26	5.50282042155459e-12	1.65573095730195	1.48616097522449	1.84464876192427	5.85480385979122e-20
C21orf59	3.10862446895044e-15	1.45571489287534	1.32535015682544	1.59890262843057	4.35179595763358e-15
C21orf62	8.11350986396064e-13	1.28766141759526	1.21717438668364	1.36223037923191	1.33992254090581e-18
C21orf88	1.5754064719431e-13	1.55826491409027	1.3903366968775	1.74647590611549	2.45181783285575e-14
C22orf34	1.00590069607165e-09	1.34355862434024	1.17899073649255	1.531097506677	9.42903422257093e-06
C22orf39	0	0.753678427550616	0.702541779994526	0.808537212063878	3.05701329998599e-15
C2orf27A	0	0.735685959269735	0.686456589416416	0.788445823102601	3.74504988954042e-18
C2orf44	6.79944212045314e-10	1.86895729283963	1.57133566608029	2.22295047319316	1.58849754103389e-12
C2orf48	1.49767975798909e-11	1.98705345706408	1.71043521852636	2.30840747341024	2.76274038738769e-19
C2orf66	0	2.34913688750777	2.07003336339252	2.66587206459595	5.56947231764581e-40
C2orf82	0	0.8118043551055	0.775098255217967	0.850248734959325	1.02986323027664e-18
C3orf17	7.92887977496548e-12	1.50407549208928	1.34045318896206	1.68767033756345	3.74874732494489e-12
C3orf18	3.33066907387547e-16	0.637194236447464	0.569183949402216	0.713330893094023	5.03969580033754e-15
C3orf38	3.97382127204082e-12	1.64172773075703	1.43206306707423	1.882088857611	1.1488321150121e-12
C3orf52	3.81803477722542e-11	1.7433380469598	1.51160099669344	2.01060170813977	2.2151869348793e-14
C4A-AS1	5.26189324223658e-07	1.28334075600441	1.17160073374642	1.40573784957908	7.98862006820841e-08
C4B	1.80016478390499e-08	1.13454115552431	1.08387929367272	1.18757101560343	6.1017774279973e-08
C4B-AS1	4.47706954398441e-07	1.29198424314261	1.18006402591534	1.41451925308376	3.00196747647082e-08
C4orf33	2.19660045708281e-09	1.39580886938578	1.24589059079703	1.56376684618	8.80333463343864e-09
C4orf46	3.33066907387547e-15	1.80517055232246	1.58698300956038	2.05335577214205	2.54892212553863e-19
C4orf47	2.21092033569903e-11	1.43858211778606	1.33388960895445	1.55149158949966	3.97999582321578e-21
C4orf6	0	1.92807941703989	1.69397709963879	2.19453393980686	2.77150274550734e-23
C5AR1	0	1.36794876295044	1.28967202726531	1.45097651069134	1.97805062784613e-25
C5orf15	0	1.50428158123418	1.35964038020694	1.66430999592407	2.45000656934622e-15
C5orf34	0	2.12792581496435	1.8625997722213	2.43104736805139	1.0759558477569e-28
C5orf63	5.11868325503428e-12	1.46764796517523	1.32405121071612	1.62681815646541	2.81241880573637e-13
C6ORF165	3.33066907387547e-16	1.70796434223112	1.51543446513867	1.92495436882257	1.74980512042745e-18
C6orf118	1.40328415554336e-10	1.37569374252125	1.27981740458905	1.47875256769135	4.98750373829892e-18
C6orf141	1.35669253609194e-13	1.35252026009326	1.28111618053875	1.42790410561628	1.00912379540159e-27
C6orf25	2.34679720101383e-10	1.87483023583573	1.46151171238786	2.40503608928385	7.56175509565539e-07
C6orf3	2.04147809768074e-12	0.742744235286532	0.685232139878097	0.805083368024035	4.74030850582431e-13
C7orf31	0	1.98871605662727	1.77542945026773	2.22762529555355	1.55117650257721e-32
C7orf43	6.59367693778279e-09	1.49951946503171	1.33653842435093	1.68237484612608	5.15484845115904e-12
C7orf49	0	2.06879927821615	1.80565574314897	2.37029149647522	1.14610297495564e-25
C7orf57	0	1.35144668722151	1.25761898443611	1.45227463246423	2.33291227081768e-16
C7orf73	0	1.42571289847137	1.29288160054086	1.57219134994055	1.17797995432727e-12
C8orf4	0	1.38648625119344	1.31911550367849	1.45729780249553	7.77620008409225e-38
C8orf46	3.93574062229618e-13	0.768168787844685	0.717722254695735	0.822161055698249	2.73810767446956e-14
C8orf58	6.93485602276667e-10	1.772649545882	1.51235901219273	2.07773841209816	1.60062099455965e-12
C8orf76	0	2.14909810766211	1.86873510042428	2.4715234788003	7.61572040307921e-27
C9orf117	2.08055794814754e-13	1.26507074414623	1.18938995014521	1.34556710143658	7.98325162682077e-14
C9orf170	0	4.92452722039709	3.6944579939475	6.56414780846375	1.56261963145199e-27
C9orf3	7.54951656745106e-15	1.62211143201964	1.47166314503572	1.78794006411362	2.02672228192777e-22
C9orf40	8.01947397377489e-12	1.69011591670291	1.45600831536234	1.96186504002326	5.24856887774321e-12
C9orf47	5.21804821573824e-15	1.81878307304522	1.56601280223575	2.11235301657377	4.68895891965561e-15
C9orf64	0	1.80821619785102	1.6455989741749	1.98690316989908	7.09339010283501e-35
C9orf89	0	1.40783586609302	1.30798726923	1.51530666428021	7.99070012581314e-20
CA10	0	0.742738387919414	0.705438190129083	0.782010841783582	1.12742807170986e-29
CA11	1.10875753023265e-11	0.804612763287494	0.765438241331608	0.845792206199253	1.38207040224431e-17
CA13	0	2.05732785627171	1.7936385665895	2.35978306166753	6.44893957483965e-25
CA2	2.58859600421601e-12	1.29628619230327	1.21562693342365	1.3822973530404	2.43254156495194e-15
CA3	0	1.32909519999969	1.27163054040765	1.38915667289332	1.72401320195145e-36
CA4	0	0.714664696901049	0.672271641703575	0.759731033280549	4.90952428824922e-27
CA9	4.46309655899313e-14	1.24305347108895	1.19130886438431	1.29704560939774	1.13241579235011e-23
CAB39L	0	0.640419459801393	0.58749044678005	0.698117027672892	4.27687297519313e-24
CABP1	0	0.770297690814262	0.733371903090764	0.809082717749482	2.17288339484085e-25
CABP4	0	2.0280346596483	1.82862281602764	2.2491924221253	7.00232483730508e-41
CACNA1A	3.33066907387547e-16	0.782414680205122	0.73586433928038	0.831909768041135	4.49460526309255e-15
CACNA1B	9.42135258696908e-13	0.709326502529601	0.644009044864857	0.781268665716425	3.21527295637929e-12
CACNA1E	0	0.625653148696508	0.560814331934164	0.697988336217854	4.41965514727012e-17
CACNA1I	0	0.54053554064325	0.474488262678675	0.615776392547679	2.20224338852493e-20
CACNA2D2	0	0.584424244201459	0.521481178990318	0.654964572013417	2.50224908849125e-20
CACNA2D3	0	0.577931472827584	0.521827188927008	0.64006781243317	6.73199526248355e-26
CACNA2D4	6.47921716279143e-11	1.40493502457271	1.29535739169523	1.52378211289469	2.28521261866779e-16
CACNB4	3.58849616688417e-11	0.641528138964161	0.574686079538447	0.716144635717222	2.63045630838133e-15
CACNG2	0	0.533064891226242	0.48634848608264	0.58426866000311	3.34692437397147e-41
CACNG3	7.7715611723761e-16	0.754340372213109	0.701187558233303	0.811522381521324	3.97159055817532e-14
CADM2	0	0.713909560553558	0.671011990327469	0.759549557975924	1.58969855366039e-26
CALD1	0	1.53629118790224	1.43202761918038	1.64814601507262	4.84491021525249e-33
CALHM1	1.15336629136209e-11	0.404249088043709	0.294313859114033	0.555248487706634	2.22956551359734e-08
CALHM2	0	1.66756577011929	1.49513386951108	1.85988402401911	4.21397737967875e-20
CALML3-AS1	1.21661569707499e-11	0.172208884433892	0.0729048867216292	0.406775200010937	6.04609728368217e-05
CALN1	0	0.572521111442121	0.525275450584584	0.624016261719697	6.58671181422644e-37
CALU	0	1.55457436135613	1.45747431221271	1.65814342299921	5.46598698387835e-41
CALY	0	0.843576525609925	0.812726172574506	0.875597930242458	3.59445557969286e-19
CAMK2D	2.7770008514949e-12	1.43096340374603	1.30400629420689	1.57028096563432	4.03908690603342e-14
CAMK2G	0	0.706580351432151	0.658176147395946	0.758544342582563	8.59042319231891e-22
CAMK2N2	0	0.75949113777013	0.719066159502681	0.80218875652598	6.31483428820377e-23
CAMK4	0	0.592721337008757	0.534260621386727	0.657579034055638	5.50165533972097e-23
CAMKMT	1.10962350419186e-11	1.64841931471376	1.44371789256762	1.88214487824124	1.48970940126498e-13
CAMLG	2.92099677778879e-13	0.814288996889397	0.763344350305073	0.86863362542756	4.59167579265689e-10
CAMSAP3	0	0.683432299352611	0.643675531300332	0.725644653378104	1.4421698462146e-35
CANT1	0	1.82531918488704	1.63350730371022	2.03965425752864	2.33073963353837e-26
CAP1	0	1.94967652902048	1.75502891271395	2.1659122196085	1.55139302737942e-35
CAPG	0	1.2860014634956	1.22190698337843	1.35345798543542	5.2563383586809e-22
CAPN15	2.48386866630312e-11	1.57933152284466	1.42045827855371	1.75597417869288	2.95571701861044e-17
CAPN5	0	1.5980784040613	1.49040346163552	1.71353237647783	1.26667948445471e-39
CAPZA1	0	1.9560122580289	1.76840114032125	2.16352719206247	7.14668590034119e-39
CAPZB	0	1.52886149778546	1.38315872880817	1.68991268371987	9.75334589461142e-17
CARD16	0	1.3771929824959	1.29914042038672	1.45993495489221	5.84127918317073e-27
CARD6	1.15796261468404e-13	1.76781391454551	1.53439887849612	2.03673639251073	3.12379460332749e-15
CARD8	0	1.82640227525653	1.62851319229545	2.04833788687973	7.45999884664177e-25
CARHSP1	0	1.67960002738035	1.51858409574305	1.85768852701945	6.42911890815879e-24
CARM1	0	1.5147039990995	1.3510806603615	1.69814302891001	1.08672511221373e-12
CASC10	1.38674627336854e-11	1.44571509293417	1.28888975023392	1.62162212055632	3.13663276245568e-10
CASC5	0	1.75811687028804	1.60240832176645	1.92895586449777	8.74036050689808e-33
CASKIN1	0	0.712723918851238	0.671323088905632	0.756677958642463	1.37742563659108e-28
CASP1	3.33066907387547e-16	1.45136695981198	1.34474069207538	1.56644776531816	1.08783680710301e-21
CASP2	0	1.98769741471614	1.77628409042373	2.22427315189583	4.89709171023531e-33
CASP3	0	1.62247988458846	1.48008254901792	1.77857713249907	5.36879797881453e-25
CASP4	0	1.50438299523996	1.41057553615621	1.60442892872951	1.7584929623708e-35
CASP5	8.88178419700125e-16	2.21160709425771	1.87070189659801	2.61463675653828	1.50336771504251e-20
CASP6	0	1.98212823260804	1.79219765478642	2.19218696108052	1.95758630810293e-40
CASP7	0	1.74478677685825	1.58210635696253	1.92419484524673	7.4369441566369e-29
CASP8	0	1.88748661365812	1.7163130601032	2.07573186940872	3.44531892141895e-39
CASQ1	0	0.697450288045951	0.648644359459616	0.749928519690867	2.14385169910048e-22
CAST	0	1.6538956455151	1.50462041795499	1.8179806505428	1.90806053147555e-25
CASZ1	9.25926002537381e-12	1.45644014664662	1.29967340523236	1.63211610872716	9.73260975587451e-11
CATSPER2	2.74613665141032e-12	0.709250038243611	0.638307231552807	0.788077577508923	1.66834079005687e-10
CATSPERB	2.64194222054925e-10	2.1574368224664	1.67807629093812	2.77373184286623	2.00139694960979e-09
CAV1	0	1.35404601261899	1.28284627173683	1.42919743751301	3.91289431622976e-28
CAV2	0	1.4268878776654	1.33547043596697	1.52456315062807	6.75916889206624e-26
CBFA2T3	0	0.58485855358815	0.518317126878534	0.659942552477884	3.20325643264192e-18
CBFB	1.44052547668139e-11	1.53676421360043	1.38699027759344	1.70271146550545	2.16247220107551e-16
CBLN1	0	0.63334677844449	0.585675105815943	0.684898739561716	2.64848304897703e-30
CBLN2	0	0.712837457684018	0.659730159879621	0.770219814067818	1.04178763684522e-17
CBR1	6.38378239159465e-14	1.20081467036909	1.13195016744812	1.27386868613164	1.25370196937759e-09
CBS	1.21320731238939e-11	0.781567950919082	0.730598957947945	0.836092708946042	7.90567355549469e-13
CBWD2	3.7247982476174e-13	1.48744236426622	1.32382530456618	1.6712815349446	2.42014628305705e-11
CBWD6	3.00170999167904e-12	1.31513659514573	1.18879756635817	1.4549022582457	1.0603150713706e-07
CBX3	1.32027722088424e-12	1.44721241880842	1.31684243694193	1.59048928436507	1.66230942189525e-14
CBX6	1.11022302462516e-16	0.601224443687442	0.53313352653906	0.678011818228413	1.07263590453386e-16
CBX7	0	0.644809792182444	0.590318944087533	0.704330552591438	2.02107632074421e-22
CBX8	0	1.86191808813134	1.68681871408222	2.05519356524147	5.80436061516326e-35
CC2D1B	0	2.49265105289651	2.1478774999396	2.8927670557007	2.624798957322e-33
CCBL1	0	0.606646175716343	0.554270486371281	0.663971096351582	2.01106113654016e-27
CCBL2	1.1695987400806e-08	1.43602685475725	1.28588142281265	1.60370395823382	1.3406654441707e-10
CCDC102A	0	1.53906864159136	1.39722550163573	1.69531137297222	2.32456403119677e-18
CCDC109B	0	1.56299662616284	1.47377512572507	1.65761954504053	3.70315747771829e-50
CCDC122	1.13575815419154e-13	1.83987898565664	1.5893155156189	2.1299450289093	3.27617543620216e-16
CCDC125	0	2.03024670387745	1.73882958923252	2.37050352957506	3.31301690366277e-19
CCDC135	2.47377192064135e-08	1.36422562606608	1.24989273419556	1.48901702353939	3.53320212575278e-12
CCDC137	2.73825406793549e-12	1.49246683562898	1.34085027344015	1.66122743126083	2.36776595012182e-13
CCDC138	1.78534964589971e-12	1.9566477016425	1.67378081515118	2.28731874190892	3.59802538624597e-17
CCDC146	7.105427357601e-15	1.38637170875128	1.28240909729882	1.49876238313841	2.13427417993395e-16
CCDC15	1.22124532708767e-15	1.97471353854892	1.70576413017702	2.28606844893831	8.33802675320698e-20
CCDC150	0	1.62953463134448	1.48583113556236	1.78713654007929	3.52087102544156e-25
CCDC18	0	2.06537032172852	1.86617096462974	2.28583267381577	1.23292200637187e-44
CCDC181	0	1.55682938983329	1.39973802522625	1.73155097980347	3.44749562985065e-16
CCDC19	0	1.29617865936933	1.20881370884338	1.38985776279126	3.18256719222422e-13
CCDC23	1.11022302462516e-16	1.35739626266497	1.2486629699583	1.47559802622991	7.34145676099187e-13
CCDC30	5.99520433297585e-15	1.81225626437868	1.59624883383686	2.05749423157633	4.23277359233929e-20
CCDC34	0	1.54360674476526	1.41360733539605	1.68556127491884	3.98739460400343e-22
CCDC40	6.66133814775094e-16	1.49616617657263	1.37875854329063	1.62357160999154	4.33151367271606e-22
CCDC64	2.24265050974282e-14	0.75126977019532	0.696539278520574	0.81030070379966	1.258711805297e-13
CCDC65	6.37476551546001e-08	1.44334168980112	1.31056571591504	1.58956945708247	9.12422287770179e-14
CCDC77	0	1.92415686754891	1.71374903805651	2.1603977996302	1.62118078669404e-28
CCDC8	4.44644321362375e-13	1.46374567864935	1.35676671179319	1.57915977237746	7.62636120331975e-23
CCDC81	3.47829121061238e-09	1.53265129483658	1.3416089032212	1.75089773623614	3.24954083498832e-10
CCDC85A	1.60838009577446e-12	0.673053782633238	0.608279607299712	0.744725598031939	1.7363617105109e-14
CCDC86	2.22044604925031e-16	1.66961441440797	1.48682120208943	1.8748806439412	4.53683308818063e-18
CCDC89	0	1.73440011624306	1.52036013845336	1.97857315983308	2.52534530818517e-16
CCDC9	0	1.85759741992655	1.64741634257573	2.09459387122666	5.07027253414808e-24
CCDC97	1.11022302462516e-16	1.75708361844777	1.53830188440977	2.00698112217558	9.74674911106897e-17
CCK	4.9960036108132e-15	0.859814277189021	0.829620642342725	0.891106794510875	1.22069703329817e-16
CCKBR	5.52624612737418e-12	0.754675305388742	0.694906000336994	0.819585406209466	2.29393117388867e-11
CCL2	1.3159473510882e-12	1.18814622515192	1.14171154394991	1.23646945660093	2.33872195819011e-17
CCL20	3.08086889333481e-13	1.26748158138832	1.19048556655626	1.3494574014919	1.2352711346695e-13
CCL5	4.44089209850063e-16	1.23919250854081	1.17159448931254	1.3106907613783	6.71435561403528e-14
CCNA2	0	1.73619018344144	1.60706221367062	1.87569362743802	1.76931944900731e-44
CCNB1	0	1.65035685464943	1.54752361212175	1.7600233859786	1.35810952664251e-52
CCNB2	0	1.5009007856819	1.41762650502201	1.5890667679253	3.48154202618496e-44
CCND2	7.58404450351691e-12	1.29556166186207	1.19944256398896	1.39938340532516	4.58833208416129e-11
CCNF	0	2.08164400755803	1.84665612001701	2.3465342178393	3.70460791406893e-33
CCNJL	0	1.95397058008643	1.74699441286844	2.18546836768321	9.3913356351891e-32
CCNL2	0	1.48708278037864	1.37025561845354	1.61387055518478	1.9874037195004e-21
CCNYL1	0	2.11342790821226	1.83094741838598	2.43948978455527	1.57657740876083e-24
CCR1	2.88447044027862e-12	1.36409945932016	1.26569027188499	1.47016009860478	4.38401657362193e-16
CCR2	1.55229495923948e-10	1.57923108017569	1.33979946621902	1.8614508122107	5.12323067276731e-08
CCR5	0	1.55882029706466	1.41607665206112	1.71595281583379	1.30819424120226e-19
CCRL2	1.58539847916472e-13	1.49407016531109	1.3423173729111	1.66297904200674	2.02398313299508e-13
CCT5	1.36701761022096e-12	1.4497036715371	1.30686002358673	1.60816055073757	2.27241703493996e-12
CCT6A	0	1.30589634179136	1.22296598134363	1.39445028031805	1.55237925831654e-15
CCT7P2	1.50408352439513e-10	0.195814201539993	0.137393854334596	0.279075084620362	1.88195978926732e-19
CCT8	3.0880642487574e-10	1.26458106071701	1.15666482699025	1.38256582357168	2.497632383504e-07
CD101	1.66533453693773e-15	1.54498542644093	1.41144669792301	1.69115842024172	4.03755512796848e-21
CD109	0	1.70535081175407	1.54588148006924	1.88127060751127	1.63438538383332e-26
CD14	2.22044604925031e-16	1.26321496428051	1.20072681745806	1.32895511516961	1.76484568730395e-19
CD151	0	1.56388956563911	1.44596215093093	1.6914347114413	5.16449428372091e-29
CD163	0	1.2620317589443	1.21355229285799	1.31244790188075	2.44695356065198e-31
CD164	0	1.53068535412715	1.40107618911735	1.67228425658664	4.07068523284242e-21
CD180	6.29163388055076e-13	1.49630733380891	1.35227249586528	1.65568377975306	6.00049678973111e-15
CD2	3.33066907387547e-16	1.36129461626096	1.248550686533	1.48421930503026	2.69964112357131e-12
CD226	2.31236141345903e-11	1.74871840240604	1.51243348411247	2.02191771277005	4.49089964399236e-14
CD247	3.41428219030604e-10	1.40635870509013	1.25482159522345	1.57619602253544	4.56699341444027e-09
CD248	0	1.38512780212835	1.31911050820559	1.45444905206524	4.54259456346241e-39
CD276	0	1.75160864612465	1.61000575569693	1.90566576443729	7.9584079484142e-39
CD2AP	8.52173887011531e-12	1.80208900533515	1.56344774868381	2.07715594325668	4.43927066214927e-16
CD300A	1.74549263931567e-12	1.39314718312376	1.28938554013174	1.50525891088197	4.61470338136119e-17
CD300LG	0	0.236842517717586	0.174509922012068	0.321439477778952	2.38851135440208e-20
CD302	2.13751238931081e-12	1.48698853625809	1.34972847221732	1.63820720424646	9.81320899041317e-16
CD36	1.45439216225896e-12	1.33221996404315	1.24355995062262	1.42720102211923	3.25407944961181e-16
CD3E	0	1.32850561366779	1.23102675048651	1.43370334141749	2.75884835507574e-13
CD3G	1.04409059176191e-08	1.33714125958216	1.12772423897988	1.58544676639594	0.000828512205285686
CD4	1.3988810110277e-14	1.4072290425224	1.29768101484724	1.52602492866989	1.43478226969487e-16
CD40	0	1.55824537741885	1.4075123214314	1.72512071068613	1.28282022212938e-17
CD44	0	1.35081101665296	1.28470505277989	1.42031853830004	7.39725074959873e-32
CD48	0	1.34533799803552	1.25869335045135	1.43794700139569	2.46413349188618e-18
CD5	1.33226762955019e-15	1.57035806480838	1.33809476005517	1.84293708138208	3.2686161955568e-08
CD53	6.75015598972095e-14	1.3098529448812	1.22333528722031	1.40248937076967	9.80641049343547e-15
CD58	0	1.71947701084165	1.59292223236672	1.85608633663184	6.70885438717996e-44
CD68	5.55111512312578e-16	1.27904003269808	1.20914226725292	1.35297842904875	9.22311533172806e-18
CD69	0	1.43451075974487	1.31927789003362	1.55980869183775	3.03325824490623e-17
CD70	0	1.34458759668216	1.25103082821268	1.4451408905202	8.50873929801037e-16
CD74	0	1.29267191683909	1.22693833634581	1.36192719314744	5.37954849951481e-22
CD80	1.85407245112401e-14	1.90190994322491	1.54147036680433	2.34663053538736	2.0171049092816e-09
CD86	4.46837233880615e-10	1.32319012127545	1.21455945083787	1.44153676119611	1.48082067122735e-10
CD8B	6.12399020383236e-13	1.45034405326172	1.27812084939153	1.64577385137956	8.179908934608e-09
CD8BP	0	0.276135205149617	0.216149212983893	0.35276858273226	7.19254380425655e-25
CD93	0	1.47898705668942	1.39276000976713	1.5705524990056	2.43636509202767e-37
CD96	3.23860938067355e-11	1.38922308966826	1.19146745596021	1.61980151720726	2.71714692206854e-05
CD97	0	1.55577863660229	1.44247172482415	1.67798586582565	2.20182909707567e-30
CD99P1	0	1.93690097690508	1.69233850112731	2.21680555742058	8.03896979367558e-22
CDC20	0	1.48811635733881	1.4109190702278	1.56953743110282	1.92624711296138e-48
CDC25A	0	1.62076372124631	1.4786290147977	1.77656126981086	6.21645918504965e-25
CDC25B	4.87387907810444e-12	1.43455173125317	1.30072732982864	1.58214456054565	5.11678460101103e-13
CDC25C	0	1.77002029053277	1.61726987947814	1.93719790905193	2.61226286746117e-35
CDC42	0	1.71861611940295	1.54755076479738	1.90859093805454	4.36651693641924e-24
CDC42BPG	2.89779311657412e-12	1.4055347346204	1.19911119491402	1.64749349234963	2.66244988732887e-05
CDC42EP3	4.44089209850063e-16	1.53101287036657	1.39546600675991	1.67972591082354	2.14966373494887e-19
CDC45	0	1.48919728238825	1.38905284306611	1.59656168369904	3.55721055901326e-29
CDC6	0	1.92662354011929	1.76688860390809	2.10079925646227	6.91734184425565e-50
CDC7	3.41948691584548e-14	1.51186147240609	1.382753107284	1.6530247516388	1.1305203888305e-19
CDCA2	0	1.95107886540756	1.77438215558692	2.14537140550813	2.56017318645108e-43
CDCA3	0	1.549814698164	1.44868738324305	1.65800132342437	4.23116365965345e-37
CDCA4	0	1.86569335705105	1.69417125931958	2.05458077711837	8.20875890443922e-37
CDCA5	0	1.48431381373492	1.37560147897386	1.60161756971052	2.50683232800427e-24
CDCA7	0	1.50604800597923	1.40034889850093	1.61972534040773	2.75661001560456e-28
CDCA7L	0	1.55071105454667	1.4461000973972	1.66288957384168	7.87180325809025e-35
CDCA8	0	1.70818471293	1.5950229036718	1.82937499315567	6.51173156834217e-53
CDCP1	0	1.60961124442466	1.45473972539035	1.78097037769633	2.92186080393152e-20
CDH10	9.10382880192628e-15	0.73987016344038	0.692603562051135	0.790362465258126	3.73098507984838e-19
CDH11	2.22044604925031e-16	1.40405097314716	1.31045087433466	1.50433654080804	5.36585858004452e-22
CDH18	0	0.593239245155474	0.545946130171973	0.644629172262432	7.18041195324955e-35
CDH2	1.84367843214517e-09	1.37599932210242	1.26055423611056	1.50201719226959	9.40113740491274e-13
CDH20	0	0.674925299278343	0.630988316909895	0.721921701873617	2.42791381719966e-30
CDH22	0	0.652352245060177	0.608873082573421	0.698936221381961	6.61648588935739e-34
CDH5	1.30910393636441e-10	1.40535454112739	1.28536601997309	1.53654395368933	7.82579623639706e-14
CDH6	3.08086889333481e-13	1.55543872155468	1.41324316372214	1.71194149642271	1.6973881060336e-19
CDHR1	0	0.635374907675328	0.595857999760836	0.677512550751133	1.39510839233939e-43
CDIP1	0	0.717183563571499	0.670062065804274	0.767618837278511	9.07961112077614e-22
CDK1	0	1.46239681793284	1.37686390845691	1.55324316365941	4.28405098190355e-35
CDK11A	3.10862446895044e-15	1.58633249959099	1.441773404173	1.74538578113253	2.93943914545127e-21
CDK11B	1.11022302462516e-16	1.57512822076291	1.39564228854495	1.77769685843381	1.83269146516693e-13
CDK13	1.21125331986605e-13	2.00209902185767	1.7251483491247	2.32351061017867	6.32016769681864e-20
CDK2	0	1.6418445151698	1.53659130825214	1.75430734087611	1.0382096552916e-48
CDK20	5.57278667656647e-11	1.7369272557226	1.49752342153003	2.01460374395322	2.94997841148043e-13
CDK4	4.55191440096314e-15	1.2792515955133	1.21222322958646	1.34998621102286	2.99901395141246e-19
CDK5R2	0	0.741699374273589	0.700415993228451	0.785416048628697	1.51089603569398e-24
CDK6	0	1.641044821338	1.52730520552715	1.76325471549137	1.25726805571917e-41
CDK7	6.34570174185001e-12	1.58959525642962	1.40964781748858	1.79251373847782	3.99266047388715e-14
CDKN2C	0	1.53604210812673	1.44426114259368	1.63365563772022	1.91296623342586e-42
CDKN3	0	1.4981092626473	1.40613633980121	1.59609797379032	7.1047927087969e-36
CDR1	7.83151321570585e-13	0.80850092307786	0.76442318041955	0.8551202519251	1.07021306371254e-13
CDR2	0	1.90179680690167	1.69359356300358	2.13559567876895	1.67559535818386e-27
CEBPB	4.72510919280467e-13	1.3277686605272	1.23863301108957	1.42331877165731	1.28591794181431e-15
CEBPD	0	1.30971365860946	1.23804695741818	1.38552892301061	5.60121848662127e-21
CEBPG	0	1.70766827478486	1.53188076682972	1.90362788008739	4.68775208207168e-22
CECR1	1.437217012068e-11	1.38312072975708	1.27109767588921	1.50501648250241	5.21194609667455e-14
CECR6	0	0.579931115852854	0.5234008471863	0.642566975086737	2.18451013240675e-25
CEL	3.28905611635122e-08	1.63333175997276	1.4103315018844	1.89159260398792	5.73277427692171e-11
CELF3	0	0.773556841501513	0.734256736224887	0.814960432110389	4.84455137990684e-22
CELF4	0	0.777099997775735	0.736301262236701	0.820159406909878	4.94582622554285e-20
CELF5	0	0.749015297275868	0.709229635645109	0.791032815546343	3.12860689206124e-25
CELSR1	0	1.55662000235634	1.45656390745415	1.66354927465627	5.9665778986771e-39
CELSR3	4.9737991503207e-14	0.715482946683384	0.65897992094162	0.776830720825696	1.50441991528398e-15
CEND1	0	0.786660182886863	0.748550366212556	0.826710227223201	2.77119569720765e-21
CENPA	0	1.67680486879538	1.56323282466363	1.79862815292464	2.69631050268054e-47
CENPE	0	1.99932877712726	1.80714565482205	2.211949849412	3.71784605392751e-41
CENPF	0	1.50522529954965	1.42521459622042	1.58972775637636	9.41909227839167e-49
CENPH	0	1.58447562407707	1.45416723007911	1.72646099524456	7.6637574568569e-26
CENPI	0	2.11122604852488	1.87581703601865	2.37617813591797	3.01776830860927e-35
CENPK	0	1.67526740775733	1.55660454230027	1.80297616461188	4.11580069317127e-43
CENPL	0	2.28423348745959	2.02608400680623	2.57527457287253	1.56484950986888e-41
CENPM	4.38538094726937e-14	1.34338086209751	1.25638620717475	1.43639919822746	5.53879129779507e-18
CENPN	0	1.716399998791	1.58438551423423	1.85941422045481	5.8882617181655e-40
CENPO	7.54951656745106e-15	1.70530352734684	1.5044168445297	1.93301486283921	7.03841935628026e-17
CENPW	0	1.55651132645348	1.43465634414792	1.68871626941218	1.99575338480932e-26
CEP104	1.30284671939762e-12	1.78076771650634	1.56520680814964	2.02601575947656	1.85900729032029e-18
CEP112	0	2.08647564813144	1.87556855666423	2.32109917538186	1.08230580686471e-41
CEP135	0	1.7994625891005	1.65920094233948	1.95158134674548	1.07351995872962e-45
CEP164	6.40383024386182e-09	1.60084590553223	1.40266616867117	1.82702603833892	2.98893825042247e-12
CEP55	0	1.83904335134798	1.69983481215909	1.98965242030863	5.58639020285642e-52
CEP85	1.9913737325794e-11	1.57418607308081	1.40416732109572	1.76479095863581	7.20027263533946e-15
CEP89	0	2.29170441019471	2.02832851970329	2.58927932664188	1.92625705863044e-40
CEPT1	2.22044604925031e-16	1.63472791432781	1.4747140694194	1.81210406091443	8.67561600201014e-21
CERKL	1.24651177157986e-08	1.37996001578357	1.23343654006593	1.54388943679227	1.87362319213282e-08
CERS2	0	1.60537598548754	1.46480887340155	1.75943230654747	4.29016111686452e-24
CFH	0	1.32704958720638	1.24768573618281	1.41146168128237	2.40213235709268e-19
CFI	0	1.37069425032078	1.30495050261978	1.43975018522972	2.95746376342392e-36
CFL1P1	4.61852778244065e-14	0.662622815881412	0.594720842280359	0.738277465513188	8.59596283331094e-14
CFLAR	0	1.91507688141932	1.68603498766867	2.17523330688287	1.55814244244856e-23
CGREF1	0	0.739903548604785	0.691322142740487	0.791898924382438	3.51400267777333e-18
CHADL	9.99200722162641e-16	0.759054969945329	0.716608522968503	0.80401562210282	6.01774352042247e-21
CHAF1A	0	1.55833696031486	1.42900137824557	1.69937840428453	1.06812403670289e-23
CHAF1B	0	2.01378874471382	1.81163464515837	2.2385005272305	1.82484834984441e-38
CHCHD3	4.94160268260657e-13	1.62366517912404	1.44978753736541	1.81839652083823	4.9946011536851e-17
CHD1	1.4432899320127e-15	1.66270697320937	1.50457515164144	1.83745855150074	2.02691292081643e-23
CHD3	0	0.669741264701832	0.612031645238827	0.732892433150862	2.79803113850579e-18
CHD5	5.15677500700917e-11	0.788769487773288	0.741098334040323	0.839507088688562	8.65208098084665e-14
CHEK1	0	1.61981231444024	1.48241302563149	1.7699466266458	1.48854603082479e-26
CHEK2	0	1.80093972535411	1.64232068848015	1.97487854662542	6.89243896739738e-36
CHFR	3.21964677141295e-15	2.06377616237716	1.75662349187528	2.42463571055249	1.2247622535723e-18
CHGA	0	0.781978600985308	0.751315494544109	0.813893147205737	1.94586665571148e-33
CHGB	0	0.734856948853057	0.702573046486523	0.768624327360932	3.51088820281525e-41
CHI3L1	0	1.19997531785877	1.17195137887582	1.2286693709525	1.19088271291722e-51
CHI3L2	0	1.1995750393435	1.16399313712756	1.23624463849245	2.29708605697293e-32
CHIC2	0	1.55411080649712	1.45312698079456	1.66211241742306	7.34821543649886e-38
CHP2	6.48436859762569e-12	0.173633213548454	0.0930749114567585	0.323916427910541	3.72765007101099e-08
CHPF	8.59579074585781e-11	1.40867975680064	1.29590875101502	1.53126418481676	8.36949714183959e-16
CHPF2	0	1.89314595876889	1.70669420311942	2.09996706771038	1.61514975071013e-33
CHRAC1	2.22044604925031e-15	1.52899417162029	1.36942433654142	1.70715760956399	4.33378347202993e-14
CHRM1	0	0.697147698777302	0.65135260884102	0.746162535182404	2.31903186851068e-25
CHRM4	2.94209101525666e-14	0.604145204124987	0.531525312621696	0.686686821869194	1.23271392180053e-14
CHRNA1	1.11022302462516e-16	1.37679292482776	1.29504856172903	1.46369704880024	1.32674368567349e-24
CHRNA2	8.82988127060003e-11	0.611643037715407	0.51635696475052	0.724512752077398	1.27362918100567e-08
CHRNA4	0	0.629519728903139	0.580877260707264	0.682235501172417	1.65779362401042e-29
CHRNA7	9.02611319020252e-13	0.554204920509359	0.478581821276157	0.641777602621378	3.14119694076867e-15
CHRNA9	0	1.46832581287509	1.38387337462018	1.55793205671511	5.23591359289009e-37
CHRNB2	0	0.596015213115725	0.546230165027332	0.650337819127233	2.97019371109591e-31
CHRNE	1.0236034242439e-11	1.85747852653884	1.63388292996856	2.11167300500489	3.01049731020864e-21
CHST1	1.11022302462516e-16	0.74733763794088	0.702481109499797	0.795058454284619	2.92144777386794e-20
CHST12	1.436991636794e-09	1.34812380327057	1.2312742529619	1.47606252999505	1.06415244202656e-10
CHST14	4.10782519111308e-15	1.56529732297858	1.41469665120413	1.73193009769157	3.91054381696942e-18
CHST2	0	1.52571843311738	1.41484535554954	1.64527997920311	5.03595580437285e-28
CHSY1	0	1.7698457024251	1.60913098627901	1.94661207639529	6.76045947967273e-32
CIC	2.59681165459824e-13	1.61635550771209	1.43299343063308	1.82318011475949	5.44858381097043e-15
CIDEA	3.50119933045789e-12	0.625443848813456	0.536600878745343	0.728996212106901	1.92948137418906e-09
CIITA	0	1.43153228066636	1.33478888069783	1.53528749019729	9.31166286556069e-24
CIRBP	3.05311331771918e-13	0.702036143007607	0.637050422151541	0.773651078394164	9.45577564389355e-13
CISH	0	1.75304617612045	1.60132278365172	1.91914517609144	5.46585369875532e-34
CITED1	2.88657986402541e-15	1.22804179074196	1.16336920262143	1.29630957774241	9.91587724352797e-14
CITED2	1.771927049532e-11	1.39034678943561	1.28184647482676	1.50803097941598	1.87214532989559e-15
CKAP2	2.50974574456109e-10	1.38155283119706	1.2736683800826	1.49857549675907	6.63882033078499e-15
CKAP2L	0	1.74818295713213	1.60753759118232	1.90113355256564	6.11747998392215e-39
CKAP4	0	1.74172399574488	1.55862420101714	1.94633348781177	1.227362737912e-22
CKLF	1.60538249360798e-13	1.36327413982445	1.25473597141963	1.48120116315095	2.46314144369045e-13
CKM	3.81035092367199e-10	1.64598919320478	1.35843082522082	1.99441912966492	3.64072122560343e-07
CKMT1A	0	0.72607347392835	0.686145938801779	0.768324433229182	1.36664106372405e-28
CKMT1B	0	0.721644997884187	0.682781174225605	0.762720945787522	7.40081984615255e-31
CKS2	0	1.42935878250911	1.34552103801657	1.51842035271898	5.00620713802119e-31
CLCF1	0	1.5238562538791	1.43373276820796	1.61964484175731	8.70648002768871e-42
CLDN1	5.95870286446143e-09	1.48154748484333	1.32219298190368	1.66010785103797	1.28457664333058e-11
CLDN15	1.3473893192284e-06	1.354030764434	1.21142504537625	1.51342364765482	9.40734364985224e-08
CLDN4	6.02670136018446e-11	1.55486195288717	1.36486870837291	1.77130274707387	3.18275635501161e-11
CLDN7	0	1.59416147663278	1.44140092852587	1.76311168064743	1.14940508980335e-19
CLDN9	4.85407269934512e-11	0.600929921084746	0.517522511278317	0.697779830220207	2.38904187091418e-11
CLEC11A	6.42828013042163e-11	1.27042917276128	1.18333193837181	1.36393705828954	3.96181338552192e-11
CLEC12A	0	1.51304429086422	1.37268946737555	1.66775012158704	7.58967151041252e-17
CLEC18A	0	1.50231760660664	1.39850155714369	1.61384031329212	7.99455458476858e-29
CLEC18B	0	1.48179352711969	1.39254713527849	1.57675959498111	2.36779893072871e-35
CLEC18C	0	1.35260044235163	1.24500819172699	1.46949069797849	9.20809598724033e-13
CLEC2B	2.22044604925031e-15	1.38830169408089	1.28794283285789	1.4964807013298	1.03751657586889e-17
CLEC2L	5.47062395384046e-12	0.795464037188417	0.750183846215316	0.843477285804527	1.96972368549507e-14
CLEC4F	1.38888900380607e-13	0.550064240176111	0.482491840751551	0.627100072509463	3.96361019718253e-19
CLEC5A	0	1.47736332058611	1.38954273413209	1.57073426199912	9.46919574917687e-36
CLEC7A	4.01645383618643e-12	1.36951198631339	1.26631450204197	1.4811194830602	3.63648448896615e-15
CLEC9A	2.2690738177289e-12	0.673894862475401	0.592884396638922	0.765974426456894	1.54189994096044e-09
CLIC1	0	1.40952863886506	1.3360987794849	1.4869940862806	2.90571450828973e-36
CLIC2	0	1.7538192448522	1.55419089340059	1.97908889871556	8.08851936268357e-20
CLIC4	0	1.5293883714631	1.42129454805291	1.64570306272608	6.57308682615054e-30
CLIC6	5.6621374255883e-15	1.4743893179641	1.30297666622755	1.66835210274365	7.41924612814244e-10
CLP1	0	2.01772780672142	1.74609656205418	2.33161532442815	1.80832664364864e-21
CLPTM1L	3.70814490224802e-14	1.61055267216248	1.41666445625651	1.83097691083743	3.28984525975429e-13
CLSPN	0	1.85128676261647	1.69318086563829	2.02415627709506	1.16540982032379e-41
CLVS1	0	0.546899399028622	0.491413743805438	0.608649954194786	2.0363827608631e-28
CLVS2	2.8643754035329e-14	0.601334414206076	0.536000315704528	0.674632210306196	4.4372250785904e-18
CMPK1	3.25128368672267e-10	1.44666721874547	1.30875588670551	1.59911108179312	5.04753532644913e-13
CMTM3	0	1.64261824936348	1.4901491524888	1.81068768091806	1.7689467152908e-23
CMTM4	1.55431223447522e-15	0.653466280148301	0.598856621784899	0.713055786238324	1.23009234224662e-21
CMTM5	0	0.782129128296885	0.745239255594261	0.820845075911425	2.08969352910185e-23
CMTM6	0	1.80988564761279	1.63845890152178	1.9992482291697	1.51548305101125e-31
CMTM7	3.33066907387547e-16	1.3885110085687	1.28168090858162	1.50424556378082	9.31557195783021e-16
CMTR2	6.6605609916337e-12	1.56808417024469	1.3934430651564	1.76461315604307	8.19452729023519e-14
CNIH4	0	1.80337051662786	1.64203741393146	1.98055488422529	6.12646498659914e-35
CNN3	0	1.43369606538008	1.34445412635017	1.52886169010943	4.4293960384529e-28
CNNM1	0	0.536584685325008	0.472194902203798	0.609754834670094	1.3635188794859e-21
CNNM2	2.5234114797712e-10	0.541713803904613	0.461525179735038	0.635834962480871	6.38693865912519e-14
CNOT1	6.4393790299988e-10	1.42850185327888	1.23581737093643	1.65122905116225	1.40670307936399e-06
CNOT11	0	1.81449794772466	1.60614261274016	2.04988198194929	1.02925755524845e-21
CNOT3	8.31901214581876e-12	1.24610366388482	1.15180591021163	1.34812152584099	4.25013038325575e-08
CNPY1	2.58423244803296e-07	1.50890889933429	1.38999901226587	1.63799113984889	8.96956674631214e-23
CNPY4	0	2.02386529755834	1.80214686912016	2.27286178104933	1.06408981024146e-32
CNRIP1	0	0.706139807226956	0.664735007174586	0.750123616130783	1.53884186929455e-29
CNTN4	2.35089170352865e-10	0.628991710334144	0.557024424365839	0.710257134809643	7.51416079959946e-14
CNTN6	1.67643676718399e-14	0.458663971433962	0.378882699881249	0.555244773006291	1.30152043669299e-15
CNTNAP2	0	0.680571374480485	0.630673531000038	0.734417052556196	3.944882040274e-23
CNTNAP5	4.81610307190294e-11	0.571502352476835	0.491547003156229	0.664463289958758	3.43859035916398e-13
CNTRL	0	2.10295136518849	1.85680005318358	2.38173433739712	1.22447064987632e-31
COL11A1	2.00157668217571e-11	1.27427263784386	1.20300128282698	1.3497664372741	1.53629414930959e-16
COL11A2	0	0.723849439172291	0.66683325037462	0.78574067849149	1.15994460533132e-14
COL12A1	0	1.4147784980977	1.32299587555404	1.51292852507296	3.71493924952892e-24
COL14A1	5.10702591327572e-15	1.28322998343126	1.19897595069327	1.37340468707888	6.14843709800004e-13
COL15A1	0	1.41719577511471	1.31068699571373	1.53235964923057	2.18880660352979e-18
COL1A1	0	1.22786761688738	1.19003590828222	1.26690201035778	7.94569690739961e-38
COL1A2	0	1.27798301361692	1.23285119959244	1.32476699834765	8.89539056284187e-41
COL22A1	0	1.32666604650346	1.258317557599	1.3987270449468	1.13401980786529e-25
COL26A1	0	0.687748499536002	0.626965262614913	0.754424569937523	2.2110055949859e-15
COL27A1	2.22044604925031e-16	1.42776438019528	1.32579783453039	1.53757312937267	4.52045536403422e-21
COL3A1	0	1.26113135418004	1.22090090248253	1.30268745748489	1.07882371228756e-44
COL4A1	0	1.3528118942349	1.30208540558448	1.40551457940803	3.6268959202976e-54
COL4A2	0	1.37824277469127	1.32334838355216	1.43541426399742	5.51037922576885e-54
COL5A1	0	1.35206819295655	1.29315654262975	1.41366365025476	3.42903759794625e-40
COL5A2	0	1.48751269301875	1.41542143608776	1.56327575340939	2.5382450983662e-55
COL6A1	0	1.38693344644229	1.30397695279897	1.47516747188771	2.62673108951873e-25
COL6A2	0	1.29227164195128	1.24551636218087	1.3407820622022	2.41743951790971e-42
COL6A3	0	1.28281526614562	1.22938150866826	1.3385714649628	1.79614466302492e-30
COL8A1	0	1.35209217075043	1.28779408412352	1.41960058734767	6.92060264220548e-34
COL8A2	0	1.42906493736451	1.32337829009112	1.5431918526214	8.43582779154042e-20
COLEC12	4.9960036108132e-15	1.31292126842928	1.22652361618746	1.40540486489133	4.54024248887293e-15
COLGALT1	0	1.88097760535388	1.70305550065225	2.07748763941503	1.20783936491029e-35
COLGALT2	2.32980301717589e-12	0.784074425842588	0.730767197735626	0.841270252914107	1.27588586817586e-11
COPB1	0	1.34928265015394	1.26582510681707	1.43824266101362	3.7163930875289e-20
COPB2	9.32587340685131e-15	1.61991482035491	1.44795022018748	1.81230265282581	3.62342731819723e-17
COPG1	2.50910403565285e-14	1.57658002258493	1.40635287909821	1.76741172472142	5.74565061214126e-15
COQ2	1.11022302462516e-16	1.66906260606481	1.46635788784813	1.89978858916356	8.89128218229157e-15
CORO6	0	0.695313621953839	0.652225453598176	0.741248337070294	8.62497422729022e-29
COTL1	3.01114688738835e-12	1.31041050819821	1.20906995941364	1.4202451120604	4.61112805881603e-11
COX15	0	0.67372763981136	0.606842124655906	0.747985207689995	1.33047406297315e-13
CP	0	1.27501239894306	1.22239864458456	1.32989072317814	1.31467865853687e-29
CPA4	0	1.5773603246839	1.43394449526892	1.73511987534796	7.19893565328703e-21
CPB2-AS1	2.66986432961858e-12	0.53146940701749	0.462333196270273	0.61094408291288	6.10950954528469e-19
CPD	1.54357637782709e-11	1.51199810176025	1.37671178137039	1.66057869966867	5.39044774194194e-18
CPE	0	0.774281476635844	0.738069215287823	0.812270438386449	1.21102316682417e-25
CPEB3	0	0.477790849103925	0.417520057614148	0.546761985021613	6.9262736745469e-27
CPLX1	0	0.787115453143608	0.754941216057194	0.820660898358648	2.54164181384676e-29
CPLX2	0	0.79077235406645	0.761995359974616	0.820636120378249	2.26227510841108e-35
CPLX3	6.18300965982144e-11	0.711865454080091	0.648880799346774	0.780963815268998	6.45612956907675e-13
CPNE5	0	0.738108114983613	0.698611134021458	0.779838114329177	2.70520962123514e-27
CPNE9	1.80111481284939e-12	0.709363962423278	0.643375208499396	0.782120952963835	5.46743795894737e-12
CPQ	2.56461518688411e-14	1.40309087775128	1.29568020381757	1.51940579583482	7.76483368907094e-17
CPSF4	1.12732045920438e-12	1.60569766813377	1.41330039526511	1.82428662023164	3.53647905952108e-13
CPSF6	2.4749091664944e-12	1.30111115300997	1.19863547046858	1.41234785236676	3.19969590284398e-10
CPT2	4.32986979603811e-15	1.86361498868896	1.60612051720781	2.16239117105855	2.29837683460245e-16
CPVL	5.21916954099311e-11	1.27332744496288	1.1964833267	1.35510687521868	2.77706538552611e-14
CRB2	0	1.4064671855104	1.31786232876473	1.50102928108714	9.26370180699578e-25
CREB3L2	1.11022302462516e-16	1.88555746733243	1.66375897224865	2.13692429126791	2.99128237200927e-23
CREB5	0	1.5745438023371	1.46969061387896	1.68687760680109	3.89333160507788e-38
CREM	3.67247010579774e-10	1.2443035784935	1.13558931980627	1.36342546415976	2.78789596312517e-06
CRH	1.4432899320127e-15	0.580190525376825	0.500732208252725	0.672257626310191	4.34145554046752e-13
CRHR1	3.33066907387547e-16	0.64081894533349	0.578418591410813	0.709951109449505	1.68768146187202e-17
CRIP3	5.86430903837254e-12	0.766256900746198	0.712564105565567	0.823995530163766	6.82759517224727e-13
CRISPLD1	2.61187949046615e-09	1.30085740282916	1.216754026961	1.39077409648849	1.22840991651068e-14
CRLF1	0	0.804523876487546	0.769001468107764	0.841687167946792	3.71840033277232e-21
CRLF3	3.33066907387547e-16	2.27914790000009	1.94325895927542	2.67309466156362	4.18746759105249e-24
CRNDE	0	1.44378694366343	1.37681166480082	1.51402024836458	7.05101495616103e-52
CROCCP2	2.89644974671432e-11	1.59370092874237	1.42542140634587	1.78184685522955	2.70631952282795e-16
CROT	0	1.70405238237192	1.54581167264736	1.87849178088711	8.28525519631757e-27
CRTAC1	0	0.690620443150629	0.656727020337506	0.726263092163396	4.02419792653313e-47
CRTAM	5.56887869151979e-13	1.51207599913637	1.30017033972022	1.75851867814201	7.98841900614311e-08
CRTAP	2.51425991137921e-10	1.55266655533943	1.38976909970352	1.73465752878223	7.23837807066566e-15
CRY2	0	0.474556522777813	0.429624480527807	0.524187758188964	7.80602579845818e-49
CRYAB	3.40894201755759e-10	0.918409248321691	0.887195509728315	0.95072116365998	1.40424158932135e-06
CRYL1	6.21724893790088e-15	0.731349077315421	0.679431341225343	0.787234030042663	8.24724127360425e-17
CRYZ	0	1.67518389152131	1.53937453870468	1.82297485105466	5.74701532766755e-33
CRYZL1	1.02251540567977e-13	0.730462401873873	0.660202992212208	0.808198882533754	1.15047224473863e-09
CSDC2	0	0.693355408390569	0.658107951227183	0.730490676260644	4.61189215661828e-43
CSDE1	0	1.71201424218262	1.54230298138812	1.90040011645321	5.83640027313999e-24
CSF2RB	3.78586051397178e-13	1.62865087042852	1.44681532256602	1.83333948457442	6.74771219301992e-16
CSMD1	4.44089209850063e-16	0.612738928746258	0.551787000462578	0.680423776722473	5.0688690645778e-20
CSMD3	0	0.567990112490649	0.519052810429635	0.62154131796359	8.51883825162109e-35
CSNK1D	9.10719832880602e-10	1.51777374010872	1.33344555809533	1.72758243647689	2.68433736715763e-10
CSNK1G2	0	1.91468611008646	1.66689733716309	2.19930935062699	4.07255583890887e-20
CSPP1	4.54303261676614e-13	1.45378006868638	1.31823006976425	1.60326830390672	6.7523023795533e-14
CSRP2	5.77538017410006e-13	1.27070897018588	1.1990970930838	1.34659761600974	5.72751844620007e-16
CSTA	0	1.39843105702507	1.31646784972686	1.48549728856501	1.39999278641809e-27
CTA-268H5.14	0	0.389240795816051	0.328554138434519	0.461136779008213	1.02383750433894e-27
CTA-384D8.35	1.89082194346213e-10	1.75501167112193	1.47339556109396	2.09045421820554	2.91938116883159e-10
CTA-445C9.14	1.01775698979623e-10	0.735078883073856	0.659477468561892	0.819347119651285	2.72553156256673e-08
CTA-796E4.4	1.45550238528358e-13	0.657861300195626	0.590260144874862	0.733204662474427	3.74924607903695e-14
CTA-85E5.10	6.80233647187833e-13	1.50962520816502	1.35327617327206	1.68403782918678	1.54461852360868e-13
CTB-12O2.1	4.1044945220392e-13	0.459933015219771	0.380942835163558	0.555302158126496	6.55405070366242e-16
CTB-13F3.1	1.40324418751447e-11	1.72016801110427	1.5112809166602	1.95792718203939	2.18011011757349e-16
CTB-175P5.4	1.11022302462516e-16	1.83193438520268	1.62743536387693	2.06213018727404	1.19597658239701e-23
CTB-1I21.1	0	0.446204419878962	0.383698327870221	0.518893020526433	1.06738879951823e-25
CTB-25B13.12	1.11022302462516e-16	1.5627262860635	1.42398854976362	1.71498109697525	4.89007524253802e-21
CTBP2P8	8.99280649946377e-14	1.89289196993902	1.53794532434064	2.32975773140423	1.71532981195916e-09
CTBS	0	1.80335526292752	1.62648552424268	1.9994584371371	4.2858147818605e-29
CTC-1337H24.1	6.10622663543836e-15	1.52168035755854	1.38653547807527	1.66999773694488	8.99955910844192e-19
CTC-203F4.2	4.38538094726937e-14	0.585501299624282	0.515492294428855	0.66501822736564	1.74353433229397e-16
CTC-241F20.3	0	2.62769312995582	2.21007581731732	3.12422367192737	7.39929010952847e-28
CTC-273B12.8	4.61631334269796e-08	1.22993218726839	1.15425661745862	1.31056921173166	1.68447688028281e-10
CTC-297N7.5	5.55111512312578e-16	1.68004698136546	1.51821813349423	1.85912537686463	1.01911860485023e-23
CTC-301O7.4	6.11266592898119e-12	2.15872682510698	1.8502918099718	2.51857651875326	1.33782219691341e-22
CTC-336P14.1	5.51780843238703e-14	0.725262597817701	0.668010628080513	0.787421357807923	1.9123569594983e-14
CTC-349C3.1	5.88213922014802e-10	1.69707103188289	1.45689818107907	1.97683690230357	1.09525935511755e-11
CTC-360G5.9	0	4.27341810722661	3.29349361904641	5.54490289993633	8.35683576314148e-28
CTC-458G6.2	0	0.326988083815536	0.25354143981021	0.421710971734611	7.16803169576245e-18
CTC-462L7.1	0	2.50015000654128	2.13836671805929	2.92314222926242	1.47774564070996e-30
CTC-471F3.5	9.88098491916389e-15	1.95591889288219	1.68403867714133	2.27169290554983	1.558757698485e-18
CTC-471F3.6	2.23759899498077e-11	1.54555693480766	1.36826386881562	1.74582278548345	2.49357747855953e-12
CTC-525D6.1	6.43929354282591e-15	0.361089083666299	0.269417253986317	0.4839531411362	9.28960659635918e-12
CTC-548K16.1	0	1.61353824489504	1.43966039662116	1.80841653618404	1.97027640051312e-16
CTD-2006C1.2	2.15058904018406e-09	1.40814446382082	1.26974484293808	1.56162936358225	8.91619138270395e-11
CTD-2006C1.6	4.12562650708992e-10	2.72674750513058	2.19315756161893	3.39015859455508	1.74425506706958e-19
CTD-2008P7.1	6.88338275267597e-14	0.031973287188144	0.0125681851663994	0.0813395951826516	4.94603578887118e-13
CTD-2035E11.4	8.83737527601625e-14	1.51454810021902	1.39428494878848	1.64518447242095	8.04142997347672e-23
CTD-2050B12.2	1.42807099479114e-10	0.208338349915021	0.117397880767676	0.369724459772911	8.32890089687412e-08
CTD-2081K17.2	0	0.691660310468276	0.636638239829693	0.751437716347429	2.86296632206381e-18
CTD-2127H9.1	0	2.70961450652428	2.27535537663121	3.22675343349534	4.82306438549314e-29
CTD-2130F23.2	3.33066907387547e-16	0.422239000628736	0.334349677887222	0.5332314802232	4.46590078133883e-13
CTD-2162K18.5	5.92690119205486e-10	1.5161690647782	1.34584222046144	1.70805210153256	7.64113033128191e-12
CTD-2170G1.2	1.5984991108553e-12	0.322066459711423	0.239588155667279	0.43293794796391	6.08273223475428e-14
CTD-2171N6.1	1.13242748511766e-14	3.06210077679845	2.25416542750797	4.1596153737641	8.0414620546486e-13
CTD-2201E18.3	9.451195381871e-11	1.72227849562697	1.48636732870013	1.99563268057915	4.72068175110452e-13
CTD-2201I18.1	3.86513043793002e-12	2.25084899678185	1.67813439087336	3.01901995088555	6.11078685617456e-08
CTD-2210P24.4	3.33066907387547e-16	0.727403212012714	0.683874896593024	0.773702084229729	5.02228990352764e-24
CTD-2227E11.1	1.11022302462516e-15	2.04978686424391	1.79533631352645	2.34030034215367	2.5818654609677e-26
CTD-2231E14.8	3.05866443284231e-13	1.45423470514928	1.32143348026362	1.60038216773403	1.79618082262538e-14
CTD-2235C13.3	9.51128065196372e-13	0.516012439016687	0.427427747034246	0.622956368807327	5.7786498248667e-12
CTD-2260A17.2	4.95721514948144e-08	0.521651624756764	0.436349573572595	0.623629388206791	9.12061932069247e-13
CTD-2267D19.3	1.13967724146846e-11	1.48099086399071	1.32375774357848	1.65689979897286	6.99206508035042e-12
CTD-2267D19.6	0	4.98078814073555	3.73521493477796	6.64171966970534	7.84352280183667e-28
CTD-2296D1.2	3.33066907387547e-16	0.437566111051052	0.330947567725604	0.578533037290937	6.60174005864128e-09
CTD-2306M10.1	4.44089209850063e-14	2.07037244377864	1.70485636108311	2.51425407665119	2.09170930390808e-13
CTD-2320G14.2	7.44264794239058e-09	0.398177323487844	0.302538790230125	0.524049100676797	5.01330031945119e-11
CTD-2376I4.2	2.59348098552437e-13	1.8985841164061	1.61483363780488	2.23219380788319	8.33390700384758e-15
CTD-2377O17.1	1.88737914186277e-15	0.524630434993874	0.457703209348109	0.601344031897597	1.96782516519241e-20
CTD-2380F24.1	0	0.56214087769641	0.512450248174872	0.616649845526966	3.17130516704115e-34
CTD-2396E7.9	4.97157870427145e-13	0.822334983011606	0.78313798034853	0.863493843043782	4.1617854895432e-15
CTD-2521M24.4	1.03150821217923e-12	1.66689962332376	1.2982164984007	2.1402858133908	6.16742102156745e-05
CTD-2521M24.6	1.90099047614467e-11	2.00791773241558	1.72527927715483	2.33685854431502	2.13792314468221e-19
CTD-2521M24.9	0	1.68603111344588	1.53366936309476	1.85352917904764	3.09363125318434e-27
CTD-2527I21.14	2.98742142135211e-11	2.23840900174845	1.80905333954852	2.76966673650372	1.20935580637947e-13
CTD-2537I9.12	1.66533453693773e-15	1.56308402205914	1.42090457373937	1.71949031987895	4.32395319549471e-20
CTD-2545M3.8	0	0.727229942933483	0.678975467470349	0.778913841864445	9.67509039627124e-20
CTD-2555A7.2	0	0.391891125596892	0.30925396900779	0.496610131841932	8.98572344241884e-15
CTD-2562J17.7	6.66133814775094e-16	0.726637819870768	0.676359458409396	0.780653711132027	2.57890705766912e-18
CTD-2587H19.1	6.44552189399406e-11	1.74074166865191	1.49612614689844	2.02535164782914	7.26394259811646e-13
CTD-2587M2.1	0	4.47515761933234	3.3153192872132	6.0407562538879	1.2344425362772e-22
CTD-2616J11.2	1.99750549434441e-10	1.6870712523375	1.4580904665478	1.95201153547239	2.10539178290255e-12
CTD-2619J13.14	1.68403146982854e-09	1.6207284764144	1.41128382304442	1.86125622030733	7.9482442130657e-12
CTD-2619J13.17	1.16373577441209e-11	2.21848377724568	1.84107015228392	2.67326601531003	5.52197008119525e-17
CTD-2619J13.8	9.17044218340379e-14	1.4375755683222	1.28433608177731	1.60909869617385	2.76711928786703e-10
CTD-2636A23.2	6.87228052242972e-14	0.692053080387994	0.636999748628632	0.751864450662021	3.22295776365418e-18
CTD-3049M7.1	0	1.40320238376422	1.33422669323832	1.47574391951539	1.26694328388748e-39
CTD-3092A11.2	1.25455201782643e-14	1.71311674641518	1.5361257240755	1.91050051493305	3.8476574751931e-22
CTD-3099C6.11	6.66133814775094e-15	1.61148918675671	1.46361767591919	1.77430038032499	2.55785562267903e-22
CTD-3099C6.9	1.34664501771908e-11	2.10466710282574	1.74859131435364	2.5332526687943	3.57063652694208e-15
CTD-3138B18.5	0	2.1690053903443	1.8579455320132	2.53214332835953	1.08872085821351e-22
CTD-3148I10.15	1.92984961344678e-10	1.90557316535656	1.6009278947821	2.26819027912638	4.0278450504738e-13
CTD-3193O13.11	1.29984911723113e-12	0.755511374463551	0.697659065061846	0.818160998012982	5.28702018666851e-12
CTD-3193O13.9	2.56905607898261e-13	0.807533024236152	0.77106251979558	0.845728547932624	1.2338015450498e-19
CTD-3199J23.4	8.88178419700125e-16	0.771786870996463	0.723813732921953	0.822939586733067	2.54080671764834e-15
CTDSP1	9.33741972630742e-12	1.57950453408419	1.36048580595359	1.83378214037584	1.94847174825101e-09
CTDSP2	2.52029952463317e-10	1.41672904099634	1.31566095954359	1.52556109614949	2.83621615306196e-20
CTF1	5.88418203051333e-15	1.56328188598598	1.40552409196045	1.73874661347367	1.84248703879205e-16
CTGF	3.77475828372553e-15	1.23137690349801	1.1629891319461	1.30378611185391	9.38375562223293e-13
CTHRC1	0	1.40376773916671	1.3388992652342	1.4717790327419	7.68715051325764e-45
CTIF	0	0.719658929297225	0.674876766604828	0.767412659829328	1.05896588764177e-23
CTNNA1	0	1.66097420084976	1.4716846366674	1.87461037993562	2.04874042944085e-16
CTNNA3	1.11022302462516e-16	0.614341849340809	0.546345766016571	0.690800462504248	3.92946932882137e-16
CTNNAL1	6.94999613415348e-14	1.46482040517416	1.32266188730268	1.62225799353026	2.32023483978996e-13
CTNNB1	2.674527266322e-12	1.41688089513381	1.28050435622088	1.56778183630709	1.49477099055034e-11
CTPS1	0	1.958172236018	1.76271165717977	2.1753067158168	5.44111047357601e-36
CTSA	0	1.58207370694167	1.43101023319086	1.74908407790702	3.27066504602375e-19
CTSB	0	1.44882687620957	1.35015352290187	1.5547115802917	6.8967736947637e-25
CTSC	0	1.35726517596289	1.28252172297768	1.43636456589955	4.11154473086497e-26
CTSF	0	0.711608839904146	0.659890882278588	0.767380114847445	9.77827569781338e-19
CTSS	3.15469872447238e-12	1.3252518398529	1.24403584798395	1.4117699597481	2.607698700955e-18
CTSZ	0	1.41689076604347	1.32867574178156	1.51096266739045	2.28727376043809e-26
CTTN	1.70974345792274e-14	1.74446340163772	1.51089380948736	2.0141405971383	3.27077114957854e-14
CTTNBP2NL	0	1.89613915770217	1.68424706311664	2.13468901570677	3.59727566422181e-26
CUBN	0	2.33639518681371	1.94767436727542	2.80269769971993	6.24253070547279e-20
CUL1	8.16346990006878e-12	1.43038755859471	1.27376352151931	1.60627034234905	1.45275718005522e-09
CUL7	7.84927678409986e-14	1.8036862774553	1.6003565835981	2.03284956666729	4.22608524159049e-22
CUX2	0	0.582739527335609	0.530148083697402	0.640548116954352	4.55582472193391e-29
CWC25	2.54074539185467e-12	1.7761296244156	1.54212262109559	2.04564565720819	1.59597444930621e-15
CX3CL1	1.08157927058983e-12	0.73673036402458	0.675898126740177	0.803037629196504	3.6872623055605e-12
CXCL10	0	1.35936254899845	1.28988814779094	1.43257889669288	1.85853736236354e-30
CXCL11	3.13265857698752e-10	1.46999553010027	1.33789358538996	1.61514105614382	1.06591979881495e-15
CXCL9	0	1.35889568296302	1.25650050756191	1.46963528153176	1.68866607297209e-14
CXCR3	8.55293613710728e-12	1.32087520374435	1.16446708699689	1.49829164203018	1.50550179383555e-05
CXCR4	4.77395900588817e-14	1.32919608524058	1.24450924106008	1.41964573241253	2.40654027286013e-17
CXCR6	7.7715611723761e-16	1.41753866666166	1.23299042187966	1.62970923035851	9.43624541703721e-07
CXXC11	0	0.67900969985922	0.645370965252154	0.714401789554895	2.01404216246458e-50
CXorf21	6.56295240375471e-10	1.58487491709245	1.39277932204039	1.80346481533704	2.83560782128461e-12
CXorf40A	2.45020670419649e-11	1.34061303052614	1.21020436038784	1.48507422088655	1.97767155387687e-08
CYB561	4.09672296086683e-14	1.40120531709232	1.27898793384756	1.53510153511878	4.34032365286314e-13
CYB561D1	1.81834547419157e-11	1.862135918836	1.5673854379204	2.21231491394989	1.53078325325981e-12
CYB5D1	2.032563006793e-11	1.68655054293091	1.47007558382613	1.93490237179327	8.81976527750758e-14
CYB5R1	1.00650821011072e-10	1.41434758052704	1.26363135122081	1.58304008254472	1.63918101575912e-09
CYB5RL	0	2.18853673131558	1.87615529052076	2.55292994589377	2.11088723445113e-23
CYBB	2.2770674235062e-13	1.35214141349006	1.25910131982637	1.45205661632299	1.09369249396906e-16
CYBRD1	1.07458486553469e-12	1.34032809632202	1.2352890345143	1.45429883662536	1.99624973524524e-12
CYFIP1	1.38156153184354e-12	1.74161900154548	1.55680939167729	1.94836745124996	3.2039747922629e-22
CYFIP2	0	0.684712873068487	0.641588136748473	0.730736264734742	3.66682356003531e-30
CYP17A1	0	0.356287883173641	0.281259831136922	0.451330199492856	1.18744935240289e-17
CYP17A1-AS1	0	0.593201837640871	0.548143352994728	0.641964220231804	2.15956293403346e-38
CYP1A1	0	0.200105253902489	0.130144426733409	0.307674432508761	2.29942227293177e-13
CYP21A1P	1.10716578016756e-07	1.20381756774357	1.10816029973932	1.30773204630139	1.12772041998898e-05
CYP27A1	6.51381171223875e-11	1.23725925201352	1.15526845060717	1.32506903991754	1.15960979523096e-09
CYP27B1	0	1.38590274910565	1.30411032545434	1.47282510726953	7.36399120996817e-26
CYP2A6	3.15730774858025e-11	0.303819967291296	0.214874549200396	0.429583554070879	1.57330654618847e-11
CYP2E1	0	0.633150737381308	0.579259900305066	0.69205525194368	7.50170055532938e-24
CYP2S1	4.19664303308309e-14	2.00515847739634	1.72744455917744	2.32751928165435	5.86884922360967e-20
CYP46A1	0	0.744387760647548	0.700360212309245	0.791183063319425	2.31454840502532e-21
CYR61	1.11022302462516e-16	1.26064626428797	1.20526710959033	1.31856995932079	5.21882553335374e-24
CYS1	0	0.542426037197467	0.479249669164112	0.613930535086076	3.59770648963369e-22
CYSTM1	3.79696274421804e-14	1.38775266973914	1.27149216159973	1.51464360578134	2.12822696052336e-13
CYTH1	2.1094237467878e-15	0.691382303443987	0.625806215720779	0.763829884567319	3.90720531688886e-13
CYTIP	0	1.60546750326527	1.45905916715925	1.7665670879264	2.91422628381584e-22
CYTL1	0	1.42955374153219	1.33101611802757	1.5353862904058	1.04979395550716e-22
DACH2	0	0.561042594900182	0.505370669495931	0.622847371823711	2.23704946614277e-27
DAP	0	1.63595031270026	1.48269609778084	1.80504516713154	1.03915022734135e-22
DAPP1	1.25421895091904e-12	1.62500344642042	1.40794972690241	1.87551881322341	3.20138302816866e-11
DAXX	8.11811728951284e-11	1.98525522805018	1.71679031468702	2.29570162808095	2.23075854841218e-20
DBF4	3.33066907387547e-15	1.6364460430502	1.48870926595298	1.79884394694111	1.93207623127634e-24
DCAF13	5.18150189421362e-10	1.46709141005692	1.32144061352948	1.62879601506571	6.73955265796456e-13
DCAF15	1.07358566481253e-13	1.62447847699296	1.45316511741226	1.81598793598395	1.42520937650913e-17
DCAF4L1	4.84945417156268e-13	2.57659983949318	1.91386221453693	3.46883212513947	4.4134044606249e-10
DCBLD1	5.81756864903582e-14	1.82868002327777	1.6198794341376	2.06439476732756	1.71357036444061e-22
DCBLD2	0	1.66150901406544	1.5365428196238	1.7966386413472	4.19651706267654e-37
DCHS1	5.45674616603264e-13	1.65391176868799	1.49896122089708	1.82487985711036	1.18672341252504e-23
DCLRE1B	0	2.15355654344888	1.89171870840754	2.45163605202996	4.20933181050412e-31
DCP1B	1.68010050316525e-12	1.60702165898667	1.39832799662057	1.84686183691781	2.32589931354942e-11
DCP2	0	2.30798106059244	1.94365931276821	2.74059169786648	1.40584987760841e-21
DCTD	0	1.69206444337777	1.54782179263631	1.84974917278223	5.88919937842421e-31
DDB2	0	1.45951914656062	1.34549116041171	1.58321080201316	8.24126370593937e-20
DDI2	5.73683323068508e-11	1.88498547214412	1.59868853413811	2.22255314548183	4.62429838501949e-14
DDIT4L	6.53699316899292e-13	1.40821897463369	1.306348625805	1.51803327331274	4.06269982552313e-19
DDN	2.22044604925031e-16	0.810388442258856	0.771083269152216	0.851697155961884	1.14997808819153e-16
DDOST	0	2.12619612464727	1.90606473746198	2.37175048234962	1.07659094807117e-41
DDR2	0	1.45067414027099	1.34464142417205	1.56506814636234	7.48718310420828e-22
DDX11	3.28559401907569e-12	1.43161408910688	1.31438639619684	1.55929710324115	1.84854923979409e-16
DDX19B	3.60911300845146e-12	1.51697870645407	1.31990514055214	1.74347710690211	4.37998464439416e-09
DDX20	0	2.41632561460798	2.1051832702276	2.77345424428504	4.27216698650548e-36
DDX25	0	0.730960516547043	0.688849185600865	0.775646234211138	4.10771167965476e-25
DDX27	1.21721521750828e-11	1.55924271157426	1.36785983916121	1.7774027455096	2.96461862410585e-11
DDX47	3.06421554796543e-13	1.43050188827598	1.2763045219397	1.60332868620663	7.63388471865754e-10
DDX5	1.88737914186277e-15	1.5314817277142	1.38747312156796	1.69043727468532	2.68103360488241e-17
DDX60	9.88132242696338e-10	1.49185046381074	1.3391011007914	1.66202372999097	3.92326366349733e-13
DDX60L	0	1.68655975025573	1.53638576963067	1.85141248207893	4.50409267287744e-28
DEAF1	0	0.731721149006326	0.686968671031126	0.779389020898856	3.00039554887574e-22
DEDD2	0	1.5603422432638	1.40531250906137	1.73247437876979	7.8899670537522e-17
DEF6	1.39475730964733e-09	1.33091693328381	1.22749186578944	1.44305631073357	4.3248098576602e-12
DEGS1	4.41751746294017e-10	1.24899454693209	1.12730258588045	1.38382311706285	2.12807513015261e-05
DEGS2	0	0.569384857914606	0.509306490574212	0.636550137142218	4.18753886274699e-23
DEK	3.58491014651463e-13	1.46522262787171	1.33443200815612	1.60883232424392	1.16988100383432e-15
DENND2A	1.74975589573023e-10	1.48346474206564	1.33621316439662	1.64694354133654	1.42508600647819e-13
DENND2D	0	1.4743132689378	1.37384145979495	1.58213278502344	4.29578751506368e-27
DENND3	1.62017954608018e-09	1.37286281957379	1.24864844754215	1.50943392039452	5.78217354107331e-11
DENR	3.33066907387547e-16	1.4916652490429	1.32585026615203	1.67821757253173	2.90639961861848e-11
DEPDC1	0	1.91456004905434	1.75535188336442	2.08820819128831	1.12139655415879e-48
DEPDC1B	0	1.82331163116652	1.6700041143287	1.9906928826241	5.72021090635859e-41
DERL1	4.32986979603811e-15	1.7734263587404	1.55334993708955	2.02468289648112	2.35759188558358e-17
DERL2	0	1.56445143895383	1.39439820234471	1.75524344532944	2.48571053996272e-14
DERL3	3.53794771257299e-12	1.38776627007021	1.27820365846877	1.50672015964321	5.73050199607071e-15
DES	2.5131008385415e-12	1.32368850257192	1.23789957007094	1.41542278081628	2.35447416939144e-16
DESI1	1.99840144432528e-15	0.68312313074839	0.610019880777204	0.764986890540241	4.13817659967451e-11
DESI2	0	1.80338275716809	1.62063589069147	2.00673660723605	2.86815592049431e-27
DFFA	0	2.22354854634923	1.87812686472792	2.63249955624698	1.74461592715755e-20
DGCR10	0	0.602635895441686	0.541607474788432	0.67054100871977	1.45075664748796e-20
DGCR2	0	0.619559915597406	0.562503323194925	0.682403948895511	2.67337237158481e-22
DGCR5	0	0.621641391096139	0.577918768458749	0.668671862231667	2.23398202379473e-37
DGCR6	0	0.701415863894169	0.668084977672652	0.736409634349638	3.02129048877867e-46
DGCR8	1.70508573926753e-09	1.70254364051114	1.4862246460452	1.95034771866969	1.65126225993372e-14
DGCR9	0	0.596972176720001	0.541414034553718	0.658231514208111	4.15661798263875e-25
DGKB	5.55111512312578e-16	0.667889836683622	0.61506821548649	0.72524774116713	7.84554698242267e-22
DGKK	0	0.184544913783589	0.131530073204677	0.258928048723849	1.37208223844747e-22
DGUOK-AS1	2.22044604925031e-16	1.47722882553556	1.34230700959127	1.62571229040787	1.41397270855183e-15
DHDDS	1.11022302462516e-16	1.88707765876599	1.63494788983082	2.17808904636233	4.01577350849208e-18
DHH	1.17683640610267e-14	1.5435249770822	1.3555350758821	1.75758591368522	5.72578088610713e-11
DHRS12	6.90774104583625e-11	0.755545099879998	0.695084917331421	0.821264256667062	4.48181266317158e-11
DHRS2	2.2948309919002e-11	0.760372570294098	0.695473966615604	0.831327229212035	1.76217225015079e-09
DHRS9	1.22124532708767e-15	0.749406649264406	0.694516791207778	0.808634626363825	1.06125553117941e-13
DHRSX	8.88178419700125e-15	1.81600895946312	1.57180150380654	2.09815840795648	5.62148896950541e-16
DHX15	4.82947015711943e-14	1.57347850037291	1.40857323858786	1.75768964176678	1.01749316896076e-15
DHX16	7.59359242152868e-12	1.9144910276887	1.6023998668321	2.28736657495278	8.47966232283589e-13
DHX34	0	1.81961753959642	1.61688570120749	2.04776873710633	3.00238856125651e-23
DHX37	5.96744875736022e-12	2.08854635357399	1.76434755523389	2.47231666917744	1.15879328154597e-17
DIAPH3	0	2.1122098043786	1.84278060002999	2.42103170482718	6.62405673274536e-27
DICER1-AS1	3.91686683087755e-13	0.771444882205678	0.724004885473507	0.821993356981441	1.11522738883627e-15
DIRAS3	0	1.42479804461838	1.34157356857093	1.51318534853874	9.43773643117219e-31
DISP1	3.28235150170997e-09	1.60177719457566	1.37752288361578	1.86253906311026	9.23933692410384e-10
DISP2	0	0.666844447109618	0.622997211998714	0.71377769928423	1.68073346764503e-31
DKC1	6.00074434586872e-11	1.70752184003146	1.52675213202019	1.90969494853526	7.15665597933682e-21
DLG2	2.50850451521956e-11	0.741528890081921	0.684049074399009	0.803838665097567	3.75189386284867e-13
DLGAP1	0	0.676172675728026	0.633675991232343	0.721519346996308	3.24926601006309e-32
DLGAP1-AS2	3.34288152714635e-13	1.540791107482	1.39323163749367	1.70397884530267	3.88052753403663e-17
DLGAP2	0	0.524668379148882	0.440918412034713	0.62432618045681	3.61723459724793e-13
DLGAP3	0	0.699013344506129	0.653017880430495	0.748248509635797	6.27187827040543e-25
DLGAP5	0	1.72449617387768	1.60445112696318	1.85352299221952	1.40995234268975e-49
DLL3	0	0.858884836185373	0.829713339523649	0.889081959623176	6.22186114670961e-18
DLL4	1.27686750062139e-12	1.45773582438637	1.33318676556668	1.59392051330195	1.33115024948781e-16
DMBX1	0	1.93371218638801	1.59363773799364	2.3463568480081	2.35419969223816e-11
DMPK	5.29121191306103e-12	1.35626325635016	1.2532299892997	1.46776731823456	4.04739549373733e-14
DMRTA2	3.33066907387547e-15	1.37866051745182	1.30256494766158	1.45920157439577	1.48486907989586e-28
DMRTC1B	0	0.678436428806727	0.628606886115342	0.73221594942498	2.10686360850621e-23
DMTF1	2.66399124981831e-11	1.42006835875323	1.28852951777546	1.5650352713794	1.53316755390918e-12
DNAAF3	4.94615459700753e-10	1.36419760670293	1.26423105158048	1.47206881828084	1.2601977926543e-15
DNAH11	0	1.50272406059667	1.39113420132827	1.62326510277728	4.39025267700234e-25
DNAH9	2.6452173784719e-12	1.34954596168728	1.25640874271323	1.44958741593391	2.10343128970411e-16
DNAJB1	0	1.54705853893589	1.42867530170438	1.67525127650711	6.38043859526553e-27
DNAJB11	0	1.44840113951836	1.33168158273799	1.5753509608842	5.51969178722385e-18
DNAJC1	0	1.85755654254632	1.63150202442178	2.11493228761364	8.47146398469906e-21
DNAJC10	6.31272811801864e-13	1.47568200688993	1.33867077927598	1.62671615693029	5.00685892592039e-15
DNAJC12	0	0.716450511039995	0.67068328020587	0.765340884317123	4.14892247687948e-23
DNAJC16	3.87604393026209e-11	1.91552088229197	1.63705812875007	2.24135000832141	5.07095380862017e-16
DNAJC2	0	1.88581497512744	1.67024790088432	2.12920376581944	1.27821370960087e-24
DNAJC21	1.14552811680824e-12	1.66490452196336	1.47033139415876	1.88522606418261	9.03378825611801e-16
DNAJC22	0	2.00060836395054	1.78630517826068	2.24062152123749	3.74116462152807e-33
DNAJC3	4.98594610043313e-10	1.51769335937059	1.33395301812542	1.7267423228402	2.351916748663e-10
DNAJC8	0	1.66309583521092	1.49750680469797	1.84699511776425	1.97878799331405e-21
DNALI1	0	1.42330570823877	1.32905863777527	1.52423608825572	5.63310503906553e-24
DNASE1L1	5.55111512312578e-15	1.63235575179568	1.46549152521357	1.81821952196695	5.26224117720221e-19
DNER	5.89284177010541e-12	0.803399719732469	0.758074966096091	0.851434407589177	1.48668855043846e-13
DNM2	4.44089209850063e-16	1.73319213953343	1.50973435603016	1.98972420581285	5.75574469737806e-15
DNM3	3.33066907387547e-16	0.660760918457538	0.603257308850622	0.723745879171703	4.66913158064894e-19
DNMBP-AS1	0	0.323696214590037	0.255497774060712	0.410098443029964	9.26599833881616e-21
DNMT3A	0	2.00992931878306	1.7955573807001	2.24989516343309	7.18411578084781e-34
DNMT3B	8.44879721739744e-14	2.70359320663469	2.27015794569254	3.21978311721894	6.68033428662199e-29
DOC2GP	5.01376717920721e-13	0.561263141129864	0.47641366729977	0.661224341812903	4.96562526129187e-12
DOCK11	9.4106278325512e-11	1.89194955020378	1.65169510077018	2.16715124894854	3.51247654052959e-20
DOCK2	2.84516854520689e-12	1.46050726731597	1.32657027004186	1.60796719635173	1.17863637421341e-14
DOCK3	3.38618022510673e-14	0.627345970759901	0.568309560470345	0.69251512626844	2.32009595300729e-20
DOCK7	0	1.64076564929246	1.49728412497887	1.79799670014941	2.81247145358597e-26
DOK2	2.22044604925031e-16	1.3511827691317	1.25019594351911	1.4603269871916	3.09919857200328e-14
DOK3	0	1.71417238180439	1.57853318801393	1.86146669379688	1.37522754429689e-37
DONSON	5.77315972805081e-15	1.45745418036145	1.31815954408732	1.6114685793394	1.98813335866065e-13
DPAGT1	0	1.77585667269567	1.58785523316974	1.98611740924408	8.39643248904126e-24
DPEP1	0	1.3038861565145	1.23664757459119	1.37478061177792	8.97029803620718e-23
DPH2	0	2.22129259628391	1.93562534177432	2.54911975567687	6.38638353627733e-30
DPH3	1.29485311362032e-12	1.5896521527718	1.39804752081051	1.80751650369295	1.51389665427269e-12
DPM1	1.06581410364015e-14	1.33779910249269	1.22065601851871	1.46618409402682	4.82983477717683e-10
DPP3	1.05447872655873e-11	1.68218286217781	1.4582400884007	1.94051665724552	9.65811271956456e-13
DPP4	2.77555756156289e-14	1.40477738258155	1.30168923968022	1.51602965935055	2.32505133664359e-18
DPP6	1.11022302462516e-16	0.713035082247717	0.664319018403929	0.765323608734729	7.43941961287099e-21
DPP9	0	2.39668952329976	2.07366628632939	2.77003137340027	2.61052075581573e-32
DPY19L1	0	1.69636824303379	1.55908706853138	1.84573733825155	1.24421869347347e-34
DPYD	0	1.44899129773717	1.35544409415409	1.54899474642542	1.26439927827341e-27
DR1	2.22044604925031e-16	1.72491224000925	1.55383592642262	1.91482394320987	1.45415982678351e-24
DRAM2	0	1.54022020280278	1.401216419702	1.69301347012932	3.54616167275309e-19
DRAXIN	0	1.66805198129188	1.56074274324883	1.78273929148628	2.14866138442164e-51
DRD5	9.99200722162641e-14	0.426658833795692	0.32782413192385	0.555290909755799	2.3664080390411e-10
DRP2	0	0.574964632013929	0.516614887453217	0.639904764836746	3.7974659961408e-24
DSCAM	3.65066865626318e-11	0.735660614409376	0.677589047425566	0.798709101998334	2.53102195229968e-13
DSCAML1	0	0.650044373361606	0.605426627647812	0.697950285042456	1.65465254846566e-32
DSCC1	6.7568173278687e-13	1.68662923445955	1.46861007279999	1.93701393393686	1.34266830163127e-13
DSE	1.28785870856518e-14	1.53315097063941	1.3992658265597	1.67984656964842	4.92062086786046e-20
DSG2	9.49906819869284e-12	1.5470865067708	1.37569932599701	1.73982542129811	3.22991839552331e-13
DSN1	0	1.67392066594477	1.52055219019357	1.84275844916595	7.98388324879887e-26
DTL	0	1.58622442155419	1.45771625905708	1.72606150195681	9.86252582434653e-27
DTX1	1.11022302462516e-16	0.715817075718488	0.656328117657503	0.780698056513182	4.27272477019107e-14
DTX2	4.44089209850063e-16	1.50854777803681	1.36935508501376	1.66188917945773	8.49840178401134e-17
DTX2P1	1.40443212615082e-12	2.0130674642724	1.72793682435507	2.34524813557614	2.74360539332466e-19
DTX3L	0	1.71754690132768	1.55690185803931	1.89476770358241	3.60315656242496e-27
DTYMK	4.20774526332934e-14	1.35309313602146	1.24392575165685	1.47184109044271	1.84700236848892e-12
DUSP10	0	2.02236238549411	1.82381416952913	2.24252540998592	1.06798904679983e-40
DUSP14	3.99680288865056e-15	1.57482826613299	1.42740443024532	1.73747819136669	1.35203076856059e-19
DUSP26	0	0.708988727895888	0.673298957608169	0.746570317098217	6.31058788193641e-39
DUSP5	0	1.51241881054116	1.40487842645995	1.62819117682845	4.11764998743845e-28
DUSP6	0	1.43369570758047	1.34562058650189	1.52753562375122	8.28683987696298e-29
DUSP9	0	0.581764097239052	0.521355857509357	0.649171693309871	3.52165525129432e-22
DYNLL1-AS1	9.02793395596291e-11	1.8784584074667	1.61924252178858	2.17917077960917	8.69668523763151e-17
DYNLT3	1.11799458579753e-13	1.23566502011053	1.1578217587569	1.31874187920261	1.84202762923482e-10
DYRK3	0	1.79627581955816	1.6340002258937	1.97466730346662	7.85353437667814e-34
DYX1C1	2.04172234674616e-11	1.57022476174104	1.39668685436303	1.76532470015204	4.31063010543593e-14
DZIP1L	1.11022302462516e-16	1.67240430902623	1.49724697904616	1.86805264060798	8.19861130139081e-20
E2F1	0	1.52470305829164	1.40540152371678	1.6541318454073	3.43049447964821e-24
E2F2	0	1.74488436739224	1.59634615727564	1.90724389048917	1.42338256656283e-34
E2F3	9.83717551861218e-11	1.61060888439626	1.45072903790221	1.78810853765444	4.06344379178479e-19
E2F4	0	2.64411149138714	2.22418365812597	3.14332206935474	3.08301365707153e-28
E2F6	1.00319752505129e-12	1.83700106510294	1.59714064175345	2.11288400343034	1.61457400455892e-17
E2F7	0	2.0371147074643	1.82996575836867	2.26771255822118	1.15128442310601e-38
E2F8	0	2.07430197084004	1.85894604519612	2.31460653597234	6.69670434576598e-39
EBF2	0	1.77128724848242	1.52474843828147	2.05768928031999	7.64519301858692e-14
EBF3	1.87627691161651e-14	1.66484888560158	1.49126045064034	1.85864368004842	1.15698929006807e-19
EBNA1BP2	2.02726724296554e-13	1.56130282660659	1.39256377626805	1.75048824184013	2.26466349700721e-14
ECE1	0	1.86965798321591	1.71054328266162	2.04357352990435	2.96720002434932e-43
ECE2	2.8199664825479e-14	0.716671855205408	0.65609409188022	0.782842818431186	1.43154896209623e-13
ECM1	6.54804210853399e-10	1.28855740446921	1.18908033042843	1.39635661453939	6.22284563952424e-10
ECM2	0	1.44791651020759	1.35221328338183	1.55039315638769	2.72390170021157e-26
ECSCR	7.41628980449605e-13	1.24241734516754	1.17008322130259	1.31922313855143	1.31859005535053e-12
ECT2	0	1.80978465021759	1.66792509892812	1.9637095708123	4.91543312141719e-46
EDEM1	0	1.70208323541917	1.52021820612601	1.90570493671278	2.83646663154604e-20
EDEM2	0	1.8120209606585	1.61244149166201	2.03630331943482	1.78779038082283e-23
EDN3	0	0.599144540922904	0.542040814638392	0.662264115954436	1.19845786721838e-23
EED	2.07944772512292e-13	1.50402869519573	1.30913929039055	1.72793096393687	8.1999647152066e-09
EEF2K	6.13320505493675e-12	1.56420695965283	1.39192302009979	1.75781517892487	5.72811835668845e-14
EFEMP1	4.21884749357559e-15	1.27273163991944	1.20929203811958	1.33949929065179	2.36310258080649e-20
EFEMP2	0	1.29183700927527	1.21930368464231	1.3686851598606	3.77973892605095e-18
EFHC1	2.60649946071112e-10	1.38838381024996	1.26609055224341	1.52248952584681	3.05801419440665e-12
EFHC2	2.99472679987645e-09	1.41735344917708	1.29047395344309	1.55670774643246	3.11205329263099e-13
EFNA1	0	1.42771280330916	1.30772242971681	1.55871292134549	1.86728153099042e-15
EFNA4	5.55111512312578e-16	1.66223996836894	1.4970868934651	1.84561211811022	1.76920483215276e-21
EFNB1	0	1.95236787718636	1.77893191505602	2.1427128804697	4.04858989840694e-45
EFNB2	0	1.58630363481026	1.4626835827079	1.7203715496373	7.46534203637716e-29
EFTUD2	1.65479852043404e-11	1.8799100645122	1.61540137543471	2.18772987592835	3.38890345672272e-16
EGF	2.55739873722405e-12	1.65155289528409	1.4439575130641	1.88899392208099	2.4712555124636e-13
EGFL6	5.52224932448553e-13	1.62688778628691	1.44055843207755	1.83731795270006	4.44353771872187e-15
EGFLAM	7.09432512735475e-14	1.45637290794014	1.33365126251601	1.59038731233276	5.73541320547224e-17
EGR1	4.66626737249953e-13	1.20187998484121	1.14843843582469	1.25780838824382	2.30076604125722e-15
EGR2	1.27191368548552e-10	1.21840612860265	1.15325276922449	1.28724034646348	1.85330119057353e-12
EHD2	0	1.39742633686221	1.29432187858975	1.50874399889141	1.15669157854876e-17
EHD3	2.8199664825479e-14	0.694073138099464	0.637610864527577	0.755535308182319	3.3010914490055e-17
EHD4	0	1.58604209977497	1.45316598337684	1.73106828196807	5.05116782994876e-25
EID2	5.34819855069202e-09	1.34997029943774	1.22088214121045	1.49270740217165	4.86486966515757e-09
EID3	7.22032433841946e-10	1.68074411443959	1.49276640242905	1.89239305870403	9.45313866108027e-18
EIF2AK3	8.15126854902815e-10	1.46915115585862	1.31955515615528	1.63570663089942	2.20545097049774e-12
EIF3I	0	1.88083371765712	1.65395470776816	2.13883455022142	5.86468079850291e-22
EIF3L	0	0.826269806961474	0.78750708626821	0.86694050860087	7.01023267149189e-15
EIF4E	6.43929354282591e-15	1.31467804693125	1.22486742826048	1.41107382497514	3.5027501697716e-14
EIF4E1B	0	0.59062639834282	0.513062601705889	0.679916137445118	2.28917851578048e-13
EIF4E2	2.19047002758543e-13	1.58484789392961	1.39410647581669	1.80168652141272	1.94750335937404e-12
EIF4G1	2.66453525910038e-15	1.63378001864767	1.45258344020628	1.83757922295557	2.72875755737518e-16
EIF4G2	1.23356880266101e-12	1.38238588333326	1.26606524441957	1.50939356313755	5.18094538313931e-13
ELAVL1	0	1.77800048051412	1.58104430886334	1.99949216539111	7.44469798709627e-22
ELAVL2	0	0.698108199647625	0.647009886048184	0.753242058466715	1.92258387618705e-20
ELF4	0	1.78910343353073	1.62587873803737	1.96871453017172	9.54892969684521e-33
ELFN2	0	0.683437310708872	0.644996154419231	0.724169523288941	5.36801254057495e-38
ELK3	0	1.76395412165225	1.60237824530589	1.94182250814318	5.25930999397046e-31
ELK4	1.45418121988428e-11	1.65176467723783	1.46293148901884	1.86497219415274	5.40695757024806e-16
ELMOD2	3.33066907387547e-16	2.04912095054072	1.75696818010915	2.38985356563719	6.18032975226193e-20
ELN	2.38556219223085e-09	1.25035022820213	1.16974306170377	1.33651204640445	4.99092642866132e-11
ELTD1	1.77635683940025e-15	1.5010181147637	1.37342891684764	1.64046013099832	3.21976420750741e-19
EMC1	0	1.84298040344743	1.63239004597899	2.08073847047642	5.3126927046508e-23
EMC3	0	1.52571061746655	1.34936676361426	1.72510021072046	1.56908036117317e-11
EMD	3.77475828372553e-15	1.64852204059056	1.4509438551538	1.87300487793499	1.66257419122724e-14
EME1	0	1.61338097200329	1.48518785905074	1.75263899779384	9.99266311502349e-30
EMILIN1	0	1.30844133231262	1.24223451970571	1.37817673953355	3.39759785699508e-24
EMILIN2	0	1.4765751025404	1.39512261321712	1.56278309360531	2.63392499367329e-41
EMILIN3	7.32747196252603e-15	1.30506502075913	1.23639902986608	1.37754452022946	4.68497084904604e-22
EML4	0	2.0874057399789	1.83805241358572	2.3705867640611	8.49783434620649e-30
EMP1	0	1.43221665746325	1.35970119242878	1.50859951093458	7.8637169023164e-42
EMP3	0	1.31812054422865	1.26734988902779	1.37092509666013	3.25457289159759e-43
EMR1	0	1.49095386480777	1.3532126906891	1.64271547427865	6.69390281874339e-16
EMR2	0	1.59070983150764	1.45154989298512	1.74321101898287	2.85479941016915e-23
EMR4P	5.89974735731857e-11	1.80022423104991	1.53697784061253	2.10855823449458	3.13091481445585e-13
EMX2OS	2.92144086699864e-12	0.702492245041836	0.649802686771483	0.759454161071309	6.86592088791862e-19
EN1	0	1.61843444620989	1.52514976769402	1.71742481437679	6.84527785318222e-57
EN2	0	1.60229649658473	1.47418392166397	1.74154257500639	1.43436768636481e-28
ENG	0	1.42009281078615	1.31618199220462	1.53220725035795	1.47882109867579e-19
ENHO	0	0.753199620202632	0.722269348071167	0.785454442152916	4.6553612564536e-40
ENPEP	0	1.68373854866854	1.54870387142039	1.83054717728081	2.57708327492034e-34
ENPP1	0	1.67387872815352	1.44693757422822	1.93641387608539	4.20803618920873e-12
ENTPD3	6.94784896282385e-10	0.670086423921992	0.588605421746574	0.762846890183571	1.42900395915262e-09
ENTPD7	2.96651592179842e-13	2.25999783118682	1.90082189102147	2.68704302128191	2.62314658009117e-20
ENTPD8	8.19396544726736e-07	1.3807338125798	1.17342782216838	1.62466393346482	0.000101609042820769
EOGT	0	1.84460493707639	1.6180326028648	2.10290408726139	5.35313620948941e-20
EOMES	1.67285074681445e-11	1.52296557834599	1.26777587567748	1.82952223443063	6.93649468103024e-06
EPB41L4A-AS1	0	0.81307394647973	0.772516351908779	0.855760840285988	2.2571047274943e-15
EPB42	5.99520433297585e-15	0.302469784963991	0.212075699692018	0.43139299292198	4.07872084914425e-11
EPHA1	2.85327317328665e-14	1.54099895957226	1.38369696339219	1.71618342471545	3.50186158490474e-15
EPHA10	0	0.537115216713523	0.483993381398754	0.596067564377561	1.31156454689016e-31
EPHA2	0	1.46326923335916	1.3635104797847	1.57032665391292	4.26131727866839e-26
EPHB1	4.25965263062267e-10	0.788540478521394	0.736645037083454	0.844091869170233	7.93484846370247e-12
EPHB2	0	1.65197950819784	1.53658562363095	1.77603919595244	4.78537891760925e-42
EPHB4	2.42361686275672e-13	1.46486446101735	1.33659795130395	1.60544005552173	3.20275998342011e-16
EPHX3	2.1072250500076e-08	1.99008414850612	1.63769439130114	2.41829912782983	4.48703885109894e-12
EPS8	1.17683640610267e-14	1.51117372855344	1.36080207742927	1.67816178101683	1.15535465450434e-14
EPSTI1	0	1.59349056442547	1.46747313820253	1.73032958001755	1.49103475476781e-28
ERBB2	6.10622663543836e-15	1.59647615411597	1.44182309644386	1.76771763259111	2.28666582529667e-19
ERCC6L	0	2.16530040474074	1.88718256478349	2.48440502273734	3.25874680301611e-28
ERF	0	1.77417950566653	1.60747699889486	1.95816980304614	4.77485606149937e-30
ERGIC1	4.77395900588817e-15	1.67358659140145	1.50004877442226	1.86720067152315	2.97233674356496e-20
ERI1	0	1.94352919355832	1.73542316992027	2.17659058129723	1.32138879284643e-30
ERMAP	0	1.82487868824147	1.59603248622004	2.08653787159744	1.3856105658472e-18
ERP27	0	1.71713568265152	1.55234547520598	1.89941929791361	8.35424153873754e-26
ERP44	0	2.04156362186907	1.78484658474809	2.33520463761732	2.24532540153711e-25
ERRFI1	7.07112146614008e-12	1.49352559938829	1.36999316209064	1.62819697043171	8.48949584869803e-20
ERVK3-1	8.09463607254202e-13	1.36908213747385	1.25004744364238	1.4994518077557	1.29651631192001e-11
ESAM	1.58196522548337e-09	1.3255247696642	1.21559683795962	1.44539362075215	1.77127688360639e-10
ESCO2	0	1.84033771219032	1.66452900935148	2.03471545156756	1.09690776858615e-32
ESM1	0	1.30707559266545	1.2504019774291	1.36631790078771	2.40549858589641e-32
ESPL1	0	1.62700738190869	1.50641540465783	1.75725302104611	3.0329518012864e-35
ESYT1	0	2.08507454303431	1.85125850941051	2.34842180490185	9.50380954440511e-34
ETF1	5.6683546745262e-12	1.5905992198359	1.39781862310026	1.8099672134366	1.91311533678759e-12
ETHE1	1.21095911076452e-10	1.35962842736152	1.23904043812751	1.49195248484645	8.9788931400792e-11
ETNPPL	0	0.79374563903671	0.763705188734902	0.824967734648313	8.46933953952793e-32
ETV6	0	2.0974177721567	1.86069243788369	2.36426032663533	8.03587993311836e-34
EVA1B	1.17683640610267e-14	1.31006139734938	1.23265784787415	1.39232542735593	3.57088509231564e-18
EVA1C	1.00889741005972e-10	1.21534458068538	1.14583828021646	1.28906711819951	8.54156972592434e-11
EVC	0	1.69577419785834	1.55425018731581	1.85018483741562	1.53751608799849e-32
EVC2	0	2.33738460686837	2.07254078692521	2.63607203047163	1.51160293330647e-43
EVI2B	2.76497713613821e-11	1.36343043740724	1.25588854800866	1.48018115189921	1.41162011114123e-13
EVI5L	0	0.661431526899206	0.598181047514981	0.731369986718375	7.62076872810271e-16
EXO1	0	1.94168463414503	1.767046356358	2.13358252029416	2.56977634633368e-43
EXOC3L1	2.17984519323977e-11	1.30353302512238	1.20750999431178	1.40719195334955	1.12262454058858e-11
EXOC3L2	0	1.54607726440605	1.42984152303908	1.67176212817815	8.59667510811979e-28
EXOSC10	0	1.70716375205677	1.53258086980558	1.90163412173235	2.55604689829968e-22
EXOSC3	1.33226762955019e-14	1.6677425681863	1.49242891198393	1.86365008839402	1.78314423913581e-19
EXOSC9	9.14823772291129e-13	1.50945328974217	1.34030790922696	1.69994463080322	1.11928711280887e-11
EXT1	5.73985303731206e-14	1.63283578426559	1.45853043093606	1.82797193793697	1.69708768642217e-17
EXT2	0	1.9552179748538	1.72876261273514	2.21133734674137	1.31962274499412e-26
EXTL2	0	1.70902337416788	1.53416064632861	1.90381685284513	2.21649947479076e-22
EYA1	5.10702591327572e-15	0.744713319547135	0.693314586298306	0.799922487239136	6.5770695460629e-16
EYA3	0	2.85967681930974	2.4149843127459	3.38625450597612	3.7656063784562e-34
EYA4	1.11022302462516e-16	1.56276894624992	1.44199796795122	1.69365479955079	1.44149491227275e-27
EZH2	0	1.49584930746468	1.38969662476568	1.61011051676105	7.98516253453341e-27
F2R	1.08289266442796e-10	1.34946786918859	1.25450322805273	1.45162123879036	8.2724765218541e-16
F2RL1	4.24327240011735e-13	1.4229667588447	1.28678963377309	1.57355510460544	6.29254581179557e-12
F2RL2	0	1.56774782321079	1.42696964799953	1.72241451710469	7.48844208091942e-21
F2RL3	8.07369726629759e-11	1.46701016251095	1.26773428383785	1.69761033076681	2.67863061115791e-07
F3	0	1.43193989692298	1.34337332187914	1.52634553255202	3.00754219910682e-28
F5	3.86649823269636e-09	0.760207938718981	0.711673028909689	0.812052848169267	3.79442199146139e-16
FA2H	1.98274729967807e-12	0.814229276598006	0.77156281944436	0.859255135371543	7.22922965235475e-14
FAAH	8.34887714518118e-14	0.771739139914753	0.726321073958552	0.819997273148582	5.62938943763258e-17
FABP5	0	1.23992307612331	1.19077196935811	1.29110297711478	1.99615914050624e-25
FABP5P7	0	1.4743924205148	1.36814783803412	1.58888750852763	2.5713393188471e-24
FADD	0	1.93784651401266	1.71515236633185	2.18945510940364	2.35815308558485e-26
FADS1	5.29887245193095e-12	0.677036729073363	0.615560714735931	0.744652349542802	9.70313796327267e-16
FADS2	8.19788681383216e-13	0.771513868951896	0.722344391108264	0.824030278786937	1.15864776502961e-14
FAF1	0	1.79833908087429	1.53631053468505	2.10505843498806	2.79343561774963e-13
FAIM	1.55986334959834e-13	1.43042252306912	1.28884318752833	1.58755433888534	1.67715266132671e-11
FAIM2	0	0.7197391477558	0.683310362389895	0.758110032168167	2.30937693662118e-35
FAM101A	1.11022302462516e-16	0.635289014252969	0.561863532249916	0.718309889261494	4.49687782149775e-13
FAM101B	1.40164602147053e-09	1.40996949620206	1.27478989724685	1.55948363296084	2.36913307142114e-11
FAM109B	0	1.74554807446056	1.58767038050537	1.91912510157373	1.08139837837403e-30
FAM110B	0	0.705850352322392	0.659407540178601	0.755564183780339	1.10842262242034e-23
FAM111A	0	1.67145536707694	1.53206632972616	1.82352616849797	6.38982611244112e-31
FAM111B	0	1.69244817116819	1.55144823401898	1.84626257536834	2.01277002343527e-32
FAM114A1	0	1.82895740018953	1.68785345045602	1.9818575900676	3.6557503356833e-49
FAM115C	0	1.91650068646235	1.71646078323576	2.13985365531428	6.15109558530669e-31
FAM115D	1.14352971536391e-13	1.86716275861271	1.55048842894109	2.24851517887895	4.545845607548e-11
FAM117A	0	1.90292744688595	1.67196000080701	2.16580113541235	1.92962122065044e-22
FAM120A	4.84057238736568e-14	1.9122419815047	1.64488917798036	2.2230490933856	3.26366898123303e-17
FAM120AOS	0	1.7730582700033	1.57017402449724	2.00215745502075	2.53351113968567e-20
FAM122B	5.32907051820075e-14	1.45755858300792	1.31236793410811	1.61881204781481	1.95739469780758e-12
FAM124B	3.75237460104039e-07	1.75421268050147	1.49009882351814	2.0651396268918	1.47285627074936e-11
FAM126A	0	1.65652213420323	1.52895819534232	1.79472897916013	5.19722212294259e-35
FAM127B	5.14477349611298e-13	1.22185777176944	1.13159773498623	1.31931725230215	3.09695203037035e-07
FAM129A	0	1.62969193404638	1.51689856693221	1.75087237722633	1.247157096701e-40
FAM129B	0	1.67278132152389	1.52053759477882	1.84026844140361	4.22201104207691e-26
FAM131C	0	0.715154887705443	0.663686564151403	0.77061453558718	1.39695106363724e-18
FAM132B	1.11022302462516e-16	1.3905957074169	1.29640035319732	1.49163521648007	3.14763831141458e-20
FAM133A	0	0.494416740198278	0.442637476468246	0.552253087422045	9.68699928769283e-36
FAM133B	3.30957483640759e-13	1.44495077047309	1.31434452120712	1.58853534625245	2.63892818289115e-14
FAM134A	0	0.589579742399072	0.524994156769437	0.66211074573924	4.44526946660162e-19
FAM136A	0	1.81583864287117	1.59403786200296	2.06850166833621	2.83854473546295e-19
FAM13C	0	0.606662173344587	0.56289412852944	0.653833418956917	4.19515022334165e-39
FAM149A	0	0.713570573946195	0.657143756868894	0.774842579998045	9.80814834971834e-16
FAM149B1	0	0.6933516903299	0.636852324673153	0.754863486963095	3.0549904267667e-17
FAM155A	0	0.639091426381992	0.596309131386382	0.684943144045734	9.31951013112179e-37
FAM155B	1.11022302462516e-16	0.567356104869973	0.48591792475302	0.662443045081816	7.54514646185034e-13
FAM159B	1.765254609154e-14	0.485729023027199	0.413504810352444	0.570568172132904	1.47352190851675e-18
FAM163B	2.22044604925031e-16	0.811235997340753	0.775106632792121	0.849049428219699	2.26097608487478e-19
FAM167A	0	0.717034011019618	0.668292049260686	0.769330973677838	2.02771862678773e-20
FAM169A	6.96998014859673e-13	0.672085309916114	0.609232656495322	0.741422277662339	2.15167085161526e-15
FAM181A	0	1.36737464077992	1.29218939161057	1.44693449767269	2.13771683142673e-27
FAM181A-AS1	0	1.51563579114535	1.3987508113606	1.64228812790915	3.13705676368185e-24
FAM183A	5.17793585785853e-11	1.22333050827067	1.16923967045091	1.27992367201214	2.40928042889605e-18
FAM187A	4.44089209850063e-15	1.32858359231035	1.25386222574047	1.40775782659366	6.58322613012217e-22
FAM188B	1.15686349388966e-11	1.40215025496528	1.26004439969527	1.5602825884347	5.66330209126595e-10
FAM196B	3.59712259978551e-14	0.460152109284841	0.391444517379927	0.540919477162529	5.08005541092001e-21
FAM19A1	0	0.599990727136045	0.540013344183662	0.666629587077029	1.97145578777052e-21
FAM19A2	0	0.638840999827773	0.586630594020906	0.695698156933158	6.97919363417125e-25
FAM19A3	0	1.65588817166407	1.48008092653871	1.85257818534916	1.28754058792382e-18
FAM19A5	0	0.72200782407599	0.68128054487637	0.765169799647727	4.03244853111829e-28
FAM201A	1.628106538476e-10	0.703809759636451	0.633275789058361	0.78219977191307	7.07245783833181e-11
FAM206A	0	1.76430745347235	1.55627761177847	2.00014493996408	7.34450962111437e-19
FAM20A	0	1.35686666687963	1.28426606072453	1.43357144441735	1.48246865845091e-27
FAM20C	0	1.37673266543035	1.29914069340064	1.45895886541862	3.36668089221407e-27
FAM211B	1.11022302462516e-16	0.700894691220975	0.65131182702965	0.754252184275755	2.22332609896452e-21
FAM213A	2.22044604925031e-16	0.835882574247845	0.783666061893727	0.891578328966804	5.12373514092048e-08
FAM214B	2.34858354986045e-10	1.6419545752178	1.41336563398246	1.9075140658982	8.97891545355172e-11
FAM221A	3.41948691584548e-14	1.35804898484091	1.24702520478012	1.47895731229637	2.01915940770867e-12
FAM222A	0	0.752162244463834	0.706484269846503	0.800793543669121	5.1160261064894e-19
FAM222A-AS1	1.0985166110089e-09	0.488485972335301	0.387672791693661	0.615515327051687	1.24072216700976e-09
FAM26E	7.7715611723761e-16	2.83033138403298	2.20196532038689	3.6380117657959	4.56176246683706e-16
FAM26F	0	1.35787094372203	1.27058878004602	1.45114889156959	1.79967716968947e-19
FAM3C	1.12220510661842e-09	1.27166068279415	1.17664837524166	1.37434506874864	1.31358119456901e-09
FAM3D	5.06261699229071e-14	2.15476963519558	1.76192484411332	2.63520444488509	7.69491673214537e-14
FAM43A	2.10576001080653e-12	1.49465672495632	1.35673844886904	1.64659498469981	4.07415115194849e-16
FAM45A	0	0.705747382211723	0.646000457588707	0.771020146576761	1.14749300904324e-14
FAM46A	0	1.70006046880833	1.5693928979152	1.84160741484442	1.14457361000697e-38
FAM46B	0	1.57063109890277	1.44200702418998	1.7107281777814	3.90831521634361e-25
FAM46C	1.10333964187248e-12	1.62766820667337	1.40453998796415	1.88624305019284	9.42664663627535e-11
FAM47E-STBD1	0	1.87732337058289	1.67232280928065	2.10745378713856	1.32141712016311e-26
FAM57B	0	0.717785013211285	0.681877031185587	0.755583927346715	9.43323023957064e-37
FAM64A	0	1.48528022108347	1.40469319061931	1.57049051698551	6.39257226797281e-44
FAM66C	2.630118345337e-13	0.597066789041814	0.53287915555255	0.668986104752124	6.25422252545471e-19
FAM72B	2.22044604925031e-16	1.9100124370311	1.66256294705987	2.19429135965348	6.18627662401038e-20
FAM72D	0	2.09913544669556	1.85329653828875	2.37758476991622	1.85703935480568e-31
FAM76A	4.44089209850063e-16	1.93159872605085	1.66290853462954	2.24370346340936	7.00016315550403e-18
FAM81A	0	0.670954215871387	0.616937781832262	0.729700097890888	1.17928689830387e-20
FAM83D	0	1.74777929129635	1.62100972335309	1.88446275619223	7.41433653988081e-48
FAM86B3P	3.33066907387547e-16	1.64175829817723	1.49133754594912	1.80735093604741	4.89777966651049e-24
FAM86C1	0	1.53691369210555	1.40677332001582	1.67909332894866	1.72449211703322e-21
FAM86DP	4.55191440096314e-15	1.72984252310783	1.53063448574444	1.95497696061429	1.64618011926061e-18
FAM87B	3.76365605347928e-14	3.19360299271733	2.31547277451367	4.40475922988784	1.46312426741972e-12
FAM91A1	0	1.65842239285562	1.50351024378939	1.82929570615565	4.96194878806225e-24
FAM92B	4.88498130835069e-15	1.64056957828741	1.42754682895705	1.8853802107273	3.03650892244976e-12
FAM95B1	5.62894453270957e-09	1.24991945655553	1.17347182918929	1.33134738219954	4.27576436458303e-12
FAM96A	4.64073224293315e-14	1.3283097276161	1.22224263582279	1.4435813976427	2.28600629013158e-11
FANCA	3.21964677141295e-15	1.39534071114586	1.28220775870233	1.51845571590636	1.1447270109716e-14
FANCB	1.22124532708767e-15	2.45158210013454	2.0098367912493	2.99041933149416	9.05415972009077e-19
FANCC	0	2.1420413768347	1.89660018290933	2.41924539574466	1.33860848564848e-34
FANCD2	0	1.59888033313636	1.47089426395227	1.73800277990152	2.90718825060041e-28
FANCF	7.39408534400354e-14	1.79383923668461	1.54260056734589	2.08599638505623	3.18641610404178e-14
FANCI	0	1.53889611509063	1.43006218925008	1.65601277401992	1.06106254858609e-30
FAP	7.60169704960845e-13	1.32890631404655	1.23821955611394	1.42623493773206	3.14455077847167e-15
FAS	2.22044604925031e-16	1.4171869686095	1.31126594512007	1.531664046848	1.40043285848147e-18
FASTKD5	8.52210768620409e-09	1.65091474261813	1.43160581517742	1.90381979347863	5.43335609398591e-12
FAXC	5.01820807130571e-14	0.756079311141432	0.704194122413005	0.811787412790744	1.27176184418987e-14
FBLIM1	0	1.48058965455984	1.40364357667837	1.56175382526752	4.33178378877804e-47
FBLL1	4.2632564145606e-14	0.770353140591941	0.729685231291137	0.813287614674345	4.15646841209767e-21
FBLN5	0	1.32112939533431	1.24737044043671	1.39924983199485	2.0792676209824e-21
FBLN7	1.77635683940025e-15	1.34260394601739	1.25535746927402	1.43591399261273	8.40927094991428e-18
FBP1	3.33066907387547e-16	1.39075892071259	1.28618976565834	1.50382970474937	1.33022263526687e-16
FBXL12	4.44089209850063e-16	1.77827518974878	1.55980676746322	2.02734256347598	7.49030159004831e-18
FBXL15	0	0.729731957143705	0.683512668903753	0.779076604579755	3.80326920991544e-21
FBXL16	1.13441478433174e-11	0.816312307588803	0.776817091398065	0.857815553879839	1.04668911816966e-15
FBXL5	1.80744308408975e-13	1.51128510326655	1.33442366084422	1.71158735443168	7.86564342091676e-11
FBXL7	3.36184714955223e-07	1.40612603904222	1.2504906508572	1.58113172322977	1.23410957295091e-08
FBXO17	0	1.47308773714813	1.37670112298205	1.5762226420182	3.28031132850711e-29
FBXO32	5.98850968813736e-11	1.25172281387168	1.17183319238943	1.33705890304406	2.51705562083583e-11
FBXO39	0	1.93646348638225	1.6730381375734	2.24136602141695	8.12999095018531e-19
FBXO4	1.40221168010157e-13	1.54632557136507	1.37737614256239	1.73599839489684	1.53856998986785e-13
FBXO41	2.26041407813682e-13	0.698285195210228	0.640191889856838	0.761650095190719	5.3349020254866e-16
FBXO42	0	2.07512971431519	1.8181507080119	2.36843035742758	2.68335976290335e-27
FBXO43	8.85957973650875e-14	1.87945657550179	1.58237362667029	2.23231540241851	6.5859211165221e-13
FBXO46	3.30846461338297e-14	1.8406590581256	1.62216576647153	2.08858172098485	2.97849387170859e-21
FBXO5	8.99169627643914e-13	1.54669249424091	1.41214477516441	1.69405978325604	5.87517380008097e-21
FBXW2	1.11022302462516e-16	1.81345771450051	1.6155047902337	2.03566643823178	5.92690667204509e-24
FBXW4	0	0.435281186385426	0.385692340506038	0.491245719249999	2.09997814830294e-41
FBXW9	2.92670332413536e-10	1.39658311950982	1.26776554581305	1.53848983839429	1.33148965569164e-11
FCER1G	0	1.27448295044246	1.20772814554539	1.34492749627443	9.92388340125409e-19
FCGBP	0	1.35848114815491	1.29791739789455	1.42187093946499	1.37050255933709e-39
FCGR2A	0	1.46272117876848	1.37836924413354	1.55223519091417	4.03154986286657e-36
FCGR2B	0	1.28453781097698	1.22472658811922	1.3472699979213	7.59620885930311e-25
FCGR2C	0	1.3621459817745	1.29867874262713	1.4287149044351	6.26916672740665e-37
FCGR3A	0	1.37103634372559	1.30199061161661	1.44374363305313	5.12786982705781e-33
FCGRT	5.27793364568652e-11	1.28934550087195	1.19842284229155	1.38716633391265	9.67583614647877e-12
FCHSD1	0	1.77293153943271	1.6077482280952	1.95508611894991	1.74317692905961e-30
FCHSD2	6.61692922676593e-14	0.696335466457244	0.63950517764734	0.758216037640309	7.95074654195435e-17
FDFT1	1.11022302462516e-16	0.701564758876003	0.647494131941078	0.760150689584218	4.65023649563172e-18
FDX1	9.67870350532252e-09	1.43424824461156	1.25945087347323	1.63330549090691	5.36655157339476e-08
FEM1C	4.55191440096314e-15	1.67368530052353	1.51272518703721	1.85177222485133	1.80850630258371e-23
FER1L4	1.13968834369871e-11	1.31925983612194	1.23236289482474	1.41228409465541	1.58801606480374e-15
FERMT1	0	0.759479183752951	0.717808037801683	0.80356947843681	1.22862015871028e-21
FERMT3	2.12907469432366e-12	1.30231483771822	1.21701374133817	1.3935947302256	2.13439120765219e-14
FES	0	1.65266879494337	1.50805058622122	1.81115552139634	5.75145996738808e-27
FEZ1	1.53616341869167e-10	0.827795857347181	0.777725852539486	0.881089369992832	2.90657763833461e-09
FEZF1-AS1	6.60808519015177e-10	1.34940038173235	1.26588718771629	1.43842311375656	3.81526547903354e-20
FGF11	2.22044604925031e-16	0.747922319546328	0.693847664557972	0.806211254500551	3.30630849563687e-14
FGF13	0	0.722292362970901	0.678108468652818	0.769355172104765	5.44778702030756e-24
FGFBP2	1.15377074560996e-09	1.25844466477242	1.18868531626312	1.33229791991778	2.7798321019731e-15
FGFBP3	2.23042695424169e-11	0.717475207603312	0.664484202887779	0.774692116514247	2.22841624713808e-17
FGFR1OP	9.44799793956008e-14	1.85988619298976	1.63252834891693	2.11890755414377	1.08254284922674e-20
FGFRL1	0	1.43977472189917	1.34116967849069	1.54562937342325	7.53086952648594e-24
FGL2	8.40072456043117e-12	1.39104593912054	1.27180636442763	1.52146494849047	5.25974313004785e-13
FGR	1.99840144432528e-14	1.50488835425366	1.37200727992329	1.65063917073013	4.49469941263745e-18
FHAD1	5.02931030155196e-14	1.45618135469476	1.33260227439379	1.59122056033205	9.91654402087989e-17
FHDC1	2.01165195612418e-10	0.611231306372848	0.545810729043757	0.684493158543806	1.55236743286665e-17
FHL3	0	1.67235733371148	1.51279101323462	1.84875440635951	9.10572638097997e-24
FHOD1	0	1.60530888262824	1.46410792540378	1.76012749055671	7.06581236814793e-24
FILIP1L	0	1.53361782462326	1.4277992245285	1.64727896723635	9.7179900043744e-32
FIZ1	1.12833651311206e-08	1.54425108411954	1.33256151176221	1.78956947934866	7.62190776489102e-09
FKBP10	0	1.4905533640463	1.385631611053	1.60341992297746	8.38805605693988e-27
FKBP11	1.11022302462516e-16	1.44450219925527	1.32386635468485	1.57613085057217	1.39299285582885e-16
FKBP14	1.22558962978303e-10	1.45665068320669	1.3033510894412	1.62798130916224	3.36557732408009e-11
FKBP15	0	2.06473222999142	1.80470083152836	2.36223040799232	4.73641971455881e-26
FKBP1A	2.61268784385038e-12	1.35946704399742	1.24246028020224	1.487492737727	2.26656256904053e-11
FKBP7	0	1.64068329706887	1.48921482551522	1.80755767076753	1.26757604462794e-23
FKBP9	0	1.64917223294344	1.54147411492565	1.76439489160207	9.20909186475243e-48
FKBP9L	0	1.47573347966505	1.3371036693287	1.62873631488702	1.06092616233538e-14
FKRP	4.96882535117038e-11	1.72797787833045	1.53799509232734	1.94142852789018	3.44979158861633e-20
FLII	7.93992871450655e-10	1.55787785950482	1.39877933748482	1.73507240212693	7.26743005112121e-16
FLJ30594	8.67317329067419e-12	0.760571193205158	0.707606489958194	0.817500331247237	1.07413804813355e-13
FLNA	0	1.32509053039054	1.25760136334328	1.39620150304448	4.88131674788301e-26
FLNC	0	1.39624396700147	1.32727354792743	1.46879836370745	3.75353268747034e-38
FLRT1	0	0.620908633499237	0.572426329331374	0.673497201996644	1.4966315358888e-30
FLT4	3.83660325731228e-10	1.43684796986844	1.3064411404091	1.58027179691276	8.24088536688089e-14
FMOD	0	1.32581079658548	1.26275470609974	1.39201561463338	7.9798922426717e-30
FN1	0	1.35855308471331	1.30005173433817	1.41968695186091	2.18106843534455e-42
FN3K	7.41962047356992e-13	0.790567923033295	0.743911167354441	0.840150905587083	3.6778091613042e-14
FNBP1L	3.77475828372553e-15	1.53382212400991	1.41211719032845	1.66601633647352	3.62612751786561e-24
FNDC3B	0	1.78002214805148	1.64127718530741	1.93049588205928	4.36129103738121e-44
FNDC5	2.25375273998907e-14	0.758613437853617	0.702277581876333	0.819468487879804	2.26505860495186e-12
FOS	6.42912389992034e-11	1.2338627750785	1.17375181244534	1.29705218052247	1.62577162997724e-16
FOSL1	0	1.44773473944507	1.35638893504412	1.54523221300675	9.27910405868219e-29
FOSL2	0	1.44622981088813	1.35467369903835	1.54397377566738	2.01838046513507e-28
FOXC1	1.58698446606209e-08	1.37414142923451	1.24395060060565	1.51795792101336	3.89140459612353e-10
FOXD1	0	1.38609090218283	1.29120655731251	1.48794782541444	1.81148548518356e-19
FOXD2	0	1.55124497812688	1.37614671793889	1.74862240398899	6.72615870404569e-13
FOXD2-AS1	0	1.77872754424563	1.62401614173973	1.94817748133267	2.47758244668147e-35
FOXD3	0	1.42291858783487	1.32660214989466	1.52622797103619	6.01434473759853e-23
FOXJ1	4.82391904199631e-13	1.25450269466492	1.1937256000445	1.31837418152285	3.59185977689438e-19
FOXJ3	0	1.85263066511028	1.65839382526464	2.06961719768781	1.01554525105609e-27
FOXM1	0	1.49290014786252	1.40619462712187	1.58495190388377	2.32419730749669e-39
FOXO4	7.60502771868232e-14	0.594591318032351	0.527024065240963	0.670821047455973	2.98831929837473e-17
FPGT	0	1.90995631460704	1.71162810634573	2.13126502783103	5.99091229982566e-31
FPR1	7.34279304026586e-12	1.26990789494995	1.19252138404057	1.35231626303595	9.43884750382965e-14
FPR3	2.55351295663786e-15	1.42427898896696	1.32587416987674	1.52998729781525	3.59529554247447e-22
FRA10AC1	0	0.727908436418902	0.685064165039188	0.773432210951365	1.05881770976227e-24
FREM2	0	1.5987902033694	1.46995807385713	1.73891361927266	6.85622140486851e-28
FRMD3	2.53630783042524e-10	1.25084958445839	1.1503505019414	1.36012865670001	1.62647045671983e-07
FRMD4B	1.29639632362455e-10	1.34042056207096	1.22922158449181	1.46167892419936	3.34019346079219e-11
FRMD8	0	2.24413425197853	2.00585026348303	2.51072506885847	3.13128854814993e-45
FRMPD1	0	0.371739277893127	0.311393192724999	0.443780063138835	6.70133405739187e-28
FRMPD2	2.77555756156289e-15	0.560400967948295	0.487159406215553	0.644653969256274	5.32906514486234e-16
FRRS1	0	2.20674436074414	1.86541596505981	2.61052803497364	2.64808712469867e-20
FRRS1L	6.27276008913213e-14	0.697049511195902	0.643609800195411	0.754926386936501	7.44433782882819e-19
FRY	7.93809462606987e-14	0.710178882894349	0.654696192578307	0.770363492909333	1.63797788457791e-16
FRZB	3.44169137633799e-15	1.2702906833049	1.19145438957996	1.35434342615508	2.50487050697501e-13
FSBP	0	2.36216822211844	2.05465656107769	2.7157038384359	1.35505346756023e-33
FSD1	9.24511467381706e-10	0.813648294977547	0.76566126390941	0.864642863790217	2.94565886304599e-11
FSIP1	2.44249065417534e-12	1.81245142165784	1.47706369156841	2.22399357226187	1.22606442647575e-08
FSTL1	0	1.49787666059107	1.41452638171751	1.58613831409722	1.63958835018053e-43
FSTL5	0	0.568501480410062	0.512335614481948	0.630824647150935	1.92595894766175e-26
FTL	3.81805698168591e-13	1.26362513554113	1.19148125001765	1.34013731491593	6.14099374674868e-15
FTSJ2	1.00705799255252e-09	1.36891375082339	1.23331232541866	1.51942441389065	3.63286063977878e-09
FUCA1	0	1.45932155623888	1.34050469342924	1.58866986064446	2.70756881415183e-18
FUCA2	0	1.60918777411902	1.47467919135787	1.75596516689827	1.23722034429865e-26
FURIN	1.22124532708767e-15	1.68879607616889	1.49264899805871	1.91071858862513	8.89549131900124e-17
FUT4	0	1.91416013115457	1.67942295609127	2.18170711220322	2.31442391409587e-22
FUT9	0	0.649249387293309	0.595838800602725	0.707447662814742	6.10868763618759e-23
FXYD2	6.32827124036339e-15	0.684214800721659	0.625882644504998	0.747983503995119	7.01467958081106e-17
FXYD5	3.60502183660572e-10	1.15047798775664	1.09750125519228	1.20601192395053	5.60795047730669e-09
FXYD6	0	0.805226307559972	0.771728866857397	0.84017772851625	1.64048580340358e-23
FXYD7	5.36162225728276e-10	0.875192249560893	0.842807488124413	0.908821390986962	4.21596963828513e-12
FYCO1	0	2.53805437875412	2.16681122467037	2.97290320272035	7.9598955529263e-31
FZD1	0	1.60937467208043	1.47736506829765	1.75317996256574	1.18897212230173e-27
FZD2	0	1.54265141755325	1.41864024902251	1.67750308629603	3.72561616179952e-24
FZD4	1.51830361616589e-08	1.48342624479293	1.26394989551909	1.74101317745408	1.38361651605458e-06
FZD5	0	1.85429152273738	1.66431000678525	2.06595948908415	4.22826400242386e-29
FZD6	0	1.62069201402511	1.48894391955207	1.76409774057505	6.2633809457791e-29
FZD7	1.66971436676988e-09	1.35680476285131	1.26841858901495	1.45134987806009	6.79587100663949e-19
G0S2	0	1.29154422182839	1.23718012739303	1.34829718001797	2.03529615441116e-31
G3BP1	7.18534121091352e-11	1.48616912188179	1.34272074655269	1.64494267665521	2.00407426807299e-14
G6PC	1.42219569454483e-13	0.41192057940887	0.255468361007234	0.664186214964344	0.000273979698597359
G6PC2	1.24789067967868e-13	0.428049479374659	0.321243833822371	0.570365365811909	6.87843562052634e-09
G6PD	1.11022302462516e-16	1.62584688141382	1.43558055509418	1.84133037496431	1.94993028568128e-14
GAB3	1.78187908872474e-10	1.57873860391817	1.38351308308931	1.80151211431703	1.20115987049043e-11
GABARAPL2	0	0.830165622619936	0.785757894937103	0.877083088086708	3.22941453845236e-11
GABBR1	0	0.687538766138229	0.650171156013187	0.727054023499762	1.95231344966748e-39
GABBR2	1.00618402498753e-10	0.819968626482995	0.774277747903699	0.868355767987321	1.15934567685995e-11
GABPB1	1.11022302462516e-16	1.90264584757929	1.67681774034615	2.15888771582497	1.89644040856236e-23
GABRA1	3.33066907387547e-16	0.78746480340029	0.740352902043679	0.837574641610134	3.1723240690858e-14
GABRA3	0	0.662150271079342	0.617683794866272	0.709817847148425	3.12907931016798e-31
GABRB3	0	0.659440320734036	0.620199015199064	0.701164506799856	2.27020896098951e-40
GABRD	0	0.738546313760862	0.701451200960532	0.777603141633866	9.65710446182152e-31
GABRG1	0	0.636395859575324	0.586700895184973	0.690300105911596	1.22587319917997e-27
GABRG2	0	0.702992862844942	0.660610833070306	0.748093946498048	1.14858752211537e-28
GADD45A	0	1.39764544026606	1.32258623408267	1.47696439472727	1.3789248846113e-32
GADD45B	1.35114142096882e-13	1.21642347945548	1.14619440039944	1.2909556012967	1.06762160327185e-10
GAL3ST1	2.66453525910038e-15	0.771539515195114	0.722751133667644	0.823621293385956	7.13210052121743e-15
GAL3ST4	0	1.58607324734807	1.44251667782129	1.74391629894549	1.58483044417901e-21
GALE	0	1.69742712057833	1.51784480095143	1.89825654630089	1.79225273948842e-20
GALM	0	1.90780186619471	1.70471310999029	2.1350853344917	2.36314423408035e-29
GALNS	3.41575878692879e-10	1.5197437320291	1.33312227335544	1.73249000275757	3.82081115325485e-10
GALNT1	1.73477132658917e-09	1.39161461218605	1.2547299183956	1.54343273437364	3.96800165929931e-10
GALNT10	2.15382486290494e-08	1.38568598123553	1.25226650107631	1.53332029319825	2.70175331902335e-10
GALNT13	0	0.703478920841314	0.666562184013761	0.742440246291926	1.90291591211728e-37
GALNT16	1.27065025168349e-12	0.691780454743662	0.635821470744766	0.752664418527404	1.10826251908291e-17
GALNT2	0	1.96428689874125	1.76769471741693	2.18274285856593	4.07441584925178e-36
GALNT3	0	1.73701979585727	1.57797288370732	1.91209735119863	1.85035718705971e-29
GALNT5	0	1.88267811748731	1.6649080156522	2.12893256608958	6.24886355577661e-24
GALNT7	2.22044604925031e-16	1.53856697897061	1.39593696232559	1.6957702336609	3.952578942239e-18
GALNT9	0	0.783270904788506	0.743112652135818	0.825599333458898	9.30314076737257e-20
GALNTL6	0	0.469518735800036	0.387492363575496	0.568908871475898	1.18769531909769e-14
GANAB	0	1.88658371026344	1.66473068549915	2.13800233685499	2.6603322666284e-23
GAPT	0	1.54698923182716	1.41057503272306	1.69659580516554	1.97636160971197e-20
GAREML	0	0.703178809818889	0.655973247370849	0.753781408860978	3.02001257972599e-23
GAS1	3.87192611306375e-10	1.32319176485475	1.24902279801615	1.40176500329723	1.81540375868731e-21
GAS2L3	0	1.8798671523867	1.73667459666927	2.03486624230014	5.78767429645934e-55
GATA4	1.64201985342061e-13	1.42037300771643	1.27413385730015	1.58339680677221	2.44916074080139e-10
GATA5	7.7715611723761e-15	0.156132394233329	0.0939089662770078	0.259584632814771	8.09516296276463e-13
GATAD1	3.81691345197055e-11	1.46000941017447	1.33139110340557	1.6010528178726	8.75050152006457e-16
GBE1	0	1.64743105356934	1.52028763257635	1.78520762657608	3.8654938487489e-34
GBF1	1.75223835441329e-10	0.733229113270726	0.64829274757443	0.829293455093064	7.81918449310743e-07
GBGT1	9.98090499138016e-14	1.48616015484375	1.33808461272238	1.65062207938522	1.37647104467625e-13
GBP1	0	1.37286120508127	1.30401411518011	1.4453431649832	1.48290121278211e-33
GBP2	0	1.25783320612645	1.19929840944591	1.31922494182687	3.92303438017043e-21
GBP3	6.66133814775094e-16	1.38740534166641	1.29280860231725	1.48892386594139	1.0110694393756e-19
GBP5	0	1.41838928817706	1.31734229608504	1.52718710907127	1.87444353048341e-20
GCA	2.53352894219461e-13	1.38186305136393	1.26309824438811	1.51179490685611	1.73726858597482e-12
GCH1	0	1.78768610756615	1.57185892448425	2.03314786677412	8.80238725534174e-19
GCK	2.79998246810464e-12	1.35574191400408	1.24834764156116	1.47237522321012	4.90158407734556e-13
GCLM	0	1.74891905640081	1.57398324767632	1.94329759885151	2.5861471765438e-25
GDAP1	1.66533453693773e-14	0.713335490000234	0.661038061772318	0.769770381949861	3.45165001296927e-18
GDAP1L1	0	0.751247276896541	0.719788552064179	0.784080921301102	3.08995826446882e-39
GDAP2	0	2.05362676573194	1.79232357296411	2.3530254004058	3.63722965845443e-25
GDF10	0	0.635760512230612	0.577735814067267	0.699612901035539	1.76458262286097e-20
GDF15	0	1.33839992843586	1.27946686605763	1.40004748536913	7.04534826760033e-37
GDI1	1.51922341373734e-09	0.780379430334567	0.702760940061309	0.866570722095305	3.49705227691065e-06
GDNF-AS1	0	0.661593355092885	0.608901518011633	0.718844927390539	1.74407456177859e-22
GEM	0	1.4175375796334	1.33512627105105	1.50503576571155	3.40784862933546e-30
GEMIN6	1.61815005839117e-12	1.67415197423533	1.45699698265726	1.92367236596767	3.60126121179194e-13
GEMIN7	0	1.56986207048799	1.41239792765111	1.74488143327666	6.13380776045096e-17
GEN1	1.11022302462516e-16	1.78855713492941	1.62644387160456	1.96682878564449	3.8433972591533e-33
GFI1	5.55111512312578e-16	2.10799989296067	1.66930711810671	2.66198083056288	3.74836491237334e-10
GFRA1	0	0.661287376421947	0.608523695450988	0.718626074028113	1.88050829237447e-22
GGACT	1.40898404055179e-12	1.52562941891579	1.38251462149375	1.68355913758548	4.2842934516123e-17
GGCT	1.02251540567977e-13	1.29278885292808	1.18245274446146	1.41342055831271	1.68148408441974e-08
GGH	0	1.45292654727274	1.3384883558423	1.57714898493939	4.45433365732322e-19
GGTA1P	0	0.795786000049878	0.755959523050706	0.837710669110663	2.78279920597056e-18
GHITM	3.33066907387547e-16	0.777817947848702	0.725163066274278	0.834296157833744	2.13150212848916e-12
GHRHR	1.84952053672305e-12	0.577920488624421	0.508972200055787	0.656208907156975	2.69142123081665e-17
GIMAP2	3.33066907387547e-15	1.52678875704815	1.38869075520199	1.67861987985193	2.16460538151166e-18
GINS1	0	1.74181641235272	1.59163256112495	1.90617136671101	1.66969610220076e-33
GINS2	0	1.55633685424727	1.43682516954951	1.68578923533731	1.978800288873e-27
GINS4	0	1.84933843815784	1.67139381757763	2.04622789846429	1.0367745837537e-32
GJA3	0	1.65815696703041	1.42607787176788	1.928004481202	4.90967021531381e-11
GJB6	1.87738713464114e-13	0.784058044734686	0.734482097463911	0.836980260833906	2.88176002786584e-13
GJC1	0	1.82419932527055	1.6909196339878	1.96798423262115	2.1848458395124e-54
GJD2	0	0.411890251673252	0.339330290439004	0.499965915816025	2.93042805528641e-19
GK	6.5847327590518e-13	1.63440575310483	1.46421641667018	1.8243765985475	2.00867453070464e-18
GLA	0	1.63456076529568	1.48613093855154	1.79781527060332	4.66593028975942e-24
GLB1	0	2.12526514538387	1.86634873666471	2.42010072900697	5.64231424800536e-30
GLB1L	4.76285677564192e-14	1.72828465034743	1.53346342157369	1.94785724302521	3.0711645392266e-19
GLE1	2.37587727269783e-14	2.02361160117079	1.72812534163828	2.36962204865933	2.08744587908845e-18
GLI3	0	1.73825240309705	1.56668446177149	1.9286087853684	1.85456563532658e-25
GLIPR1	1.17683640610267e-14	1.4330339782674	1.33097169932588	1.54292265110445	1.36915790628496e-21
GLIS3	0	1.45248200436059	1.34966901998453	1.56312691612018	2.16029227960753e-23
GLMN	1.27058474852504e-10	1.45809261644385	1.30417467002419	1.63017587060531	3.45506896575637e-11
GLP1R	6.66133814775094e-16	0.305506086089237	0.220714524851286	0.422871891645786	8.74903979067716e-13
GLRA1	0	0.155329058456033	0.0922110303044897	0.26165108795735	2.57364155219324e-12
GLRA3	0	0.4812562977817	0.409844277394163	0.565111279891807	4.48906716650914e-19
GLRX	0	1.40920839066134	1.30551330935958	1.52113982605394	1.41309555800533e-18
GLTSCR1	1.08441999824294e-09	1.56928298783039	1.38795007468561	1.77430668495169	6.35286536749304e-13
GLUD1	0	0.717501972693403	0.67405833874574	0.763745585844781	2.06268716203681e-25
GLUD1P2	4.44089209850063e-16	0.578705124793947	0.495575632767577	0.675779032137855	4.74380055970304e-12
GMEB1	1.11022302462516e-16	2.3473939728609	1.9897742735633	2.76928822381238	4.56898843844134e-24
GMIP	6.23767704155398e-12	1.45727885777854	1.28941733379453	1.64699326871833	1.63040279157439e-09
GMPPB	0	1.85006246979495	1.6424325092736	2.08394020626003	4.0937334178487e-24
GMPS	0	2.00071603691185	1.73750726557504	2.3037973651474	5.61385589670744e-22
GNAI3	0	1.7102470995285	1.54725236558666	1.89041245403856	8.51051899160188e-26
GNAL	0	0.54432142592947	0.500722398979461	0.591716718344858	2.98165867282536e-46
GNAO1	0	0.720023341578106	0.674911175879475	0.768150878138494	2.52091816372301e-23
GNAZ	4.44089209850063e-16	0.717572533369268	0.661301709483288	0.778631497941109	1.64853032999316e-15
GNG12	0	1.63061722726759	1.5272531474415	1.74097696005153	1.70748683802333e-48
GNG5	0	1.52355129779257	1.42258628757792	1.63168208303025	2.31737562027158e-33
GNL2	0	1.45446559856905	1.34471592354758	1.57317254921758	8.03925315735726e-21
GNPAT	1.84767678934605e-09	1.39341728232559	1.23087931634953	1.57741843322378	1.5836888101877e-07
GNPDA1	0	1.71891509281446	1.51030822061886	1.95633517448157	2.28523954155612e-16
GNRHR2	0	0.538644188277245	0.471766655446043	0.615002264817837	5.85146176568231e-20
GNS	0	1.57130465064489	1.45683255450042	1.69477150789299	1.14057893371141e-31
GOLGA2	5.20028464734423e-13	1.9696032182136	1.70745446613898	2.27200016991939	1.38409188009154e-20
GOLGA3	4.20462553663015e-11	2.07701583788121	1.72168424830566	2.50568290617451	2.2533320001619e-14
GOLGA6L2	1.32227562232856e-13	0.618609698676242	0.516909481276366	0.740319094846922	1.59641719922507e-07
GON4L	3.49839028856991e-08	1.7877646844612	1.52084560810669	2.10152993174994	1.89632275585232e-12
GPATCH1	0	2.03766127208778	1.73500529271845	2.39311284939126	4.08274876416426e-18
GPBP1L1	0	1.96831254535882	1.74430357075942	2.22108946009334	4.50387126545823e-28
GPC1	1.23623333792011e-12	1.46259925990874	1.33130062931521	1.6068471297771	2.32239208757433e-15
GPC4	9.87153692122433e-11	1.45590432843798	1.3342486144201	1.58865251247474	3.25198266971068e-17
GPHN	0	0.705279124894692	0.655099293732308	0.759302671780138	1.82518076797063e-20
GPIHBP1	1.61870516990348e-13	0.744480032663855	0.69124136591485	0.801819084281263	6.46859893165998e-15
GPM6A	9.99200722162641e-16	0.782501837807435	0.73969965677113	0.827780735825687	1.28039196876495e-17
GPN1	0	1.80689082331285	1.59498226485443	2.0469534485201	1.4692872437687e-20
GPN2	0	2.23061166396325	1.88955700021398	2.63322482192675	2.63507857602399e-21
GPNMB	0	1.27646276912504	1.2246840757771	1.33043062548886	7.11924033556854e-31
GPR1	1.46549439250521e-14	1.45241954712466	1.31005067565023	1.61026025945353	1.33370786904403e-12
GPR123	0	0.684667708304057	0.640249873657851	0.732167064893229	1.76704058222741e-28
GPR132	1.88380996357651e-08	1.48333628333585	1.29069355020743	1.70473194749209	2.77350384490332e-08
GPR141	3.86246590267092e-13	1.56546660524008	1.33438979477466	1.8365590787029	3.79517254790385e-08
GPR156	3.66373598126302e-15	1.83756463806955	1.60231813281511	2.10734917737668	3.17018653841858e-18
GPR157	0	1.45304710380894	1.31334820482485	1.60760556730582	4.31840556277354e-13
GPR158	0	0.647790743897981	0.594735317472112	0.705579163624458	2.3083165218309e-23
GPR160	1.01821207021402e-09	1.59279538111854	1.39627655496236	1.8169732329144	4.25563670920242e-12
GPR162	0	0.724920000580578	0.679945676879606	0.772869105740038	7.25765515230539e-23
GPR17	0	0.774445924787646	0.740679896092934	0.809751275259317	2.65375062337264e-29
GPR171	2.03189054470698e-09	1.50002449488592	1.24081247202229	1.81338722489674	2.80104057459169e-05
GPR27	1.33226762955019e-15	0.721129500823799	0.675715059968116	0.769596221494485	6.78307014393073e-23
GPR3	1.11022302462516e-16	1.559592102713	1.41570073836157	1.71810853871543	2.28743111667506e-19
GPR4	1.27675647831893e-14	1.60040312096786	1.43688236582046	1.78253294112992	1.21450900620725e-17
GPR6	0	0.666339554009565	0.567095039750773	0.782952362681217	8.07146955102072e-07
GPR61	0	0.548624229144274	0.48274113656488	0.623498852710051	3.66844859001295e-20
GPR65	0	1.60145444913284	1.47826409265135	1.73491080883085	9.22489741800134e-31
GPR82	0	2.00150876357809	1.74960885136164	2.28967596246566	4.93749475418309e-24
GPR84	8.88178419700125e-16	1.519518379165	1.38513357346165	1.66694111590255	8.29502112286777e-19
GPR98	1.72084568816899e-14	0.753875427944171	0.707560795382463	0.803221665992396	2.46574083134492e-18
GPRC5A	0	1.4453391349463	1.32523908463923	1.57632327571746	8.65059794267689e-17
GPRC5B	0	0.735144395437652	0.688946046056529	0.784440647038778	1.5206787069793e-20
GPRIN1	4.61383264926951e-10	0.720176770607508	0.661427408924232	0.784144373100923	4.0140527773017e-14
GPSM3	8.10334022105508e-11	1.28035059311049	1.18813342910909	1.37972520687983	9.17962413891497e-11
GPT	5.10702591327572e-15	0.661447573091305	0.600481132914985	0.728603894388001	5.40583266784501e-17
GPX1P1	7.06385616666694e-10	1.38712569734561	1.26337129521451	1.52300254685606	6.73325192870674e-12
GPX7	0	2.00033130086413	1.82894259244881	2.18778070440107	5.57070205838461e-52
GPX8	0	1.50727809375147	1.42161406426218	1.59810409098771	5.54965793105337e-43
GRAMD1A	0	1.8849980984369	1.65630743278798	2.14526467778375	7.50218931955053e-22
GRAMD1B	0	0.540066051625388	0.491430302097704	0.593515171679925	1.75287322261834e-37
GRAP	6.69464483848969e-14	1.5574128885799	1.40339973404145	1.7283278931013	7.49905438121563e-17
GRB14	0	1.41601060556974	1.33269933611882	1.5045299271517	2.49842712859007e-29
GRIA1	0	0.741026123283847	0.697993314112791	0.786711998935213	9.3198347175462e-23
GRIA2	3.26405569239796e-14	0.781380491382577	0.741664682674927	0.823223063704767	1.88160420429512e-20
GRIA4	0	0.740383541092185	0.699079016589864	0.784128510385261	1.03508913398315e-24
GRID1	0	0.709317020009572	0.659120674712367	0.763336144924933	4.66234402315383e-20
GRIK2	9.99200722162641e-16	0.72231388205346	0.676996537212461	0.77066471618215	7.57320554238898e-23
GRIK4	0	0.597044381428363	0.541469687463767	0.658323081878945	4.34979177177538e-25
GRIN1	0	0.818690734650532	0.790709246772861	0.847662426787282	1.75043885112042e-29
GRIN2B	9.52904422035772e-13	0.666189357276348	0.580723782290143	0.764232968035288	6.69859311204968e-09
GRIN2C	0	0.649809253694567	0.604261388978377	0.698790414030906	3.03541579841571e-31
GRIN3A	0	0.400069528709915	0.345750528324669	0.46292229422677	8.5136023633995e-35
GRINA	6.33604280153577e-12	0.804417087800529	0.753016419843976	0.859326349456709	1.04681799054592e-10
GRIP2	1.50518486563556e-10	0.717531935228031	0.636058956991018	0.809440811128069	6.74322233966037e-08
GRM4	0	0.578068728352731	0.493514559930934	0.677109617082238	1.10138861226809e-11
GRN	4.92161866816332e-13	1.39777927379518	1.28890520776939	1.51584995271501	5.76961613862111e-16
GRWD1	0	1.86701433036625	1.67564808994251	2.08023542097824	1.09732592818098e-29
GS1-114I9.1	9.56393942930234e-08	1.31880886962856	1.21865987867384	1.42718806538838	6.53186394819229e-12
GS1-18A18.1	0	0.183506913846117	0.125876602503244	0.26752221429283	1.18814983470346e-18
GS1-600G8.5	0	1.41022900488954	1.27814471391724	1.55596297084127	7.33504775839216e-12
GS1-72M22.1	3.44169137633799e-15	0.639666583196036	0.575023131211391	0.711577179157458	2.03576190764631e-16
GSAP	0	1.55923197344765	1.44125743383459	1.68686335275512	1.84484407534918e-28
GSC	9.18043419062542e-13	1.46620719136611	1.33976430078683	1.60458337839811	9.05014508570561e-17
GSG2	0	1.75458505108699	1.57728070066931	1.95182043385909	4.4520024813676e-25
GSPT1	1.16631967417291e-08	1.40988250287945	1.25709061823898	1.58124533194768	4.37314077006845e-09
GSR	8.58953463911405e-10	1.50335443211892	1.30262662443076	1.73501332322241	2.4666437444935e-08
GSTK1	0	1.63159018562507	1.46276237045438	1.81990362043641	1.57148050964258e-18
GSTO2	1.21680443498917e-11	0.701975819703212	0.639341975683331	0.770745657550987	1.16400155401553e-13
GSX2	0	1.39364775691006	1.30237817412234	1.49131343639823	7.62860562890767e-22
GTF2B	0	1.60464030824465	1.42860321838394	1.80236925530395	1.50776709681029e-15
GTF2E1	7.77847786181951e-11	1.77608282798157	1.52828578560317	2.06405781010784	6.76643840821372e-14
GTF2E2	0	1.67115818859355	1.47726239008264	1.8905034813396	3.3206293519008e-16
GTPBP1	8.37119262797614e-11	0.65620395691124	0.567027784675228	0.759404820546143	1.57642098391379e-08
GTPBP2	0	1.95023740749757	1.72955268196913	2.19908071332789	1.1319132026258e-27
GTSE1	0	1.63161597515945	1.52274847616517	1.74826685566603	6.74319965628017e-44
GUCY1A3	2.29943653007325e-09	0.710199640934187	0.647659995721611	0.778778268404664	3.43473932890624e-13
GUSB	0	1.68646568060455	1.52915096871642	1.85996448358816	1.30753625642357e-25
GXYLT1	8.5589424436705e-11	1.80463126017998	1.5563192750738	2.09256162111361	5.43719504748168e-15
GYPC	7.00439706236011e-13	1.28150737234492	1.19719600996384	1.37175628026358	9.104461293863e-13
GYS1	0	1.89008054878366	1.67812435289834	2.12880796033996	9.56709174132858e-26
GZMA	2.93209900803504e-13	1.28101425838165	1.19568525136948	1.37243269355172	1.90187317877388e-12
GZMH	6.24567064733128e-12	1.32756996260228	1.21713524376424	1.44802478987718	1.61167178171679e-10
GZMK	0	1.3416590182895	1.21657145156153	1.47960805676239	3.96085593287433e-09
H19	0	1.19372494315465	1.16159279637699	1.22674593399175	4.61316558111693e-37
H2AFX	3.37507799486048e-14	1.60652860995502	1.45639516961492	1.77213865333433	2.78305821762281e-21
H2AFY	0	1.58337225162962	1.41186271345422	1.77571633795537	3.95268612975166e-15
H2AFY2	1.49583678776821e-11	0.785906107779477	0.735619630660773	0.839630135604568	9.26753065122852e-13
H2AFZ	3.62376795237651e-13	1.34002548369808	1.23406344110601	1.4550858871169	3.31011376215129e-12
H6PD	0	2.07316848540823	1.83801359409662	2.33840902085511	1.71062611608758e-32
HAMP	1.55431223447522e-14	1.18417372282066	1.13383489071559	1.23674744647693	2.39921624049686e-14
HAND2	0	1.40775507023561	1.3075530997782	1.51563583774168	1.10696197651056e-19
HAND2-AS1	3.43813866265918e-12	1.39605351948326	1.2639789263575	1.54192873680108	4.70790684172826e-11
HAPLN1	0	0.715611460081198	0.667435496486985	0.767264798613435	4.95275457224615e-21
HAPLN3	2.35753638833103e-11	1.31808735670846	1.20875215314804	1.43731225246629	4.07460861881626e-10
HAR1A	0	0.482993467301105	0.430768557339957	0.541549947136555	1.16241027225987e-35
HAR1B	0	0.357309694919623	0.29597431698138	0.431355731759612	9.09174840147789e-27
HAS2	0	1.61714653451163	1.49434309665612	1.75004182100811	8.39275670426426e-33
HAS3	2.22044604925031e-16	1.48698628597721	1.34827294539937	1.63997076573344	2.00880522198638e-15
HAT1	0	1.58569911716612	1.41795207123919	1.77329103090486	6.40388803948083e-16
HAUS1	0	1.56647437066842	1.41973337798916	1.72838223852743	3.76427840923786e-19
HAUS5	3.33066907387547e-16	1.69974141179624	1.53159356036002	1.8863495784717	1.84251371430286e-23
HAUS8	3.36577432591412e-11	1.42482087115618	1.3046379293606	1.55607503752186	3.41724852594552e-15
HAVCR2	6.91668944341473e-14	1.45534092664228	1.33655975552739	1.5846782786934	5.71622107231323e-18
HBEGF	7.1241013088752e-11	1.37862728419604	1.26134573970203	1.50681381710516	1.45977368806687e-12
HBQ1	0	0.749652619160294	0.701921685646472	0.800629273757661	9.1272243349783e-18
HCAR2	2.7607249819539e-11	1.27359923658672	1.13095465473206	1.43423523538047	6.59331945618708e-05
HCCS	4.44089209850063e-16	1.62928730125006	1.44683003098651	1.83475394701663	7.91064028168135e-16
HCK	6.50557385739603e-12	1.37345027845745	1.26592249569634	1.49011149877482	2.36718041620486e-14
HCLS1	0	1.45439835083264	1.35097597773594	1.56573810176079	2.44557790951974e-23
HCP5	2.39701003490467e-09	1.41500113921897	1.29477902745864	1.54638604852976	1.82230537554273e-14
HDAC1	0	2.04264543561096	1.83281283862679	2.27650106311369	3.70940793846449e-38
HDAC11	0	0.666078175964635	0.611986945412627	0.724950327489816	5.2847637292216e-21
HDAC3	9.00520769064883e-11	1.63030254186131	1.42736598307861	1.86209171964907	5.75094347843797e-13
HDAC4	1.11022302462516e-16	0.584613160236383	0.52326324885844	0.653156031628798	2.3097485785186e-21
HDAC7	0	1.82703918604553	1.62980066507629	2.04814751820565	4.63159766836182e-25
HDC	5.28764920737501e-10	1.32744329340806	1.18389542190458	1.4883964112128	1.22848073691155e-06
HDDC2	0	0.793687055265484	0.746691958078447	0.84363991721177	1.17263362142437e-13
HDHD3	1.91711091446223e-10	1.23349290550536	1.1419540588614	1.33236949080867	9.60812800602919e-08
HEATR2	0	1.88241214361847	1.70792057951064	2.07473082820841	3.33161473195151e-37
HEATR3	0	2.19562675730236	1.89678508688166	2.54155143390942	5.91424276588436e-26
HEBP1	1.33840150073894e-09	1.16502038266172	1.08501315112993	1.25092722664588	2.57997505474282e-05
HEBP2	0	1.50451817844203	1.36882382618373	1.65366419400615	2.45388946527529e-17
HECTD3	0	2.23207199592933	1.94138223545795	2.5662877222304	1.67246631615871e-29
HECW1	1.55586654670969e-12	0.621886827982546	0.556704343529575	0.69470129219074	4.16697046925993e-17
HELLS	0	1.5536609900577	1.42174857795491	1.69781247504342	2.17774393238155e-22
HELZ2	0	1.63201035507812	1.50138392796345	1.77400180558417	1.20960065329864e-30
HERC5	0	1.52206469587318	1.39442580242728	1.66138702711242	5.44550841127464e-21
HES1	4.81414330621988e-09	1.39448937974306	1.27747606228107	1.52222079742448	1.03443957551073e-13
HES6	8.32667268468867e-15	0.830227376310158	0.795260809214342	0.866731377163932	2.3566689901306e-17
HESX1	3.70871777732873e-10	1.62701257019033	1.42114757990044	1.86269880834107	1.76334471987153e-12
HEXB	0	1.35677852908858	1.25449376174973	1.46740305382485	2.35605116940781e-14
HEXIM1	1.64860414209045e-09	1.55157801858823	1.3322061973776	1.80707337385538	1.62331271100047e-08
HFE	0	1.82742962733446	1.65081174262192	2.02294359595223	3.04784053407025e-31
HGD	1.88737914186277e-14	1.59695310494782	1.40425122606208	1.81609898006223	9.7109404832753e-13
HGF	0	1.5278066442286	1.41051892409969	1.65484709369564	2.48168751248743e-25
HIAT1	2.13304929275182e-11	1.41903498467978	1.2711806913222	1.58408659090838	4.54415746093389e-10
HIATL1	1.46216372343133e-13	1.54855606540495	1.38847115574857	1.72709809474552	3.99709025950901e-15
HIC1	1.16573417585641e-14	1.54715474417323	1.4033598627168	1.70568352851686	1.80893778191298e-18
HILPDA	0	1.40764918785769	1.3216877811911	1.4992014485378	2.03945631198895e-26
HIP1R	0	0.676469179345169	0.633969630091868	0.721817779406269	3.6040767115617e-32
HIPK1	9.10543085375082e-10	1.44932399401132	1.30322059837745	1.61180696670399	7.6492251697559e-12
HIST1H1C	5.55111512312578e-16	1.18399255530958	1.1381448884481	1.23168709472478	5.20836719106162e-17
HIST1H2AC	0	1.18273681106686	1.13730222129548	1.22998648737287	4.5656265576147e-17
HIST1H2AE	4.44089209850063e-16	1.16883984664067	1.12462236044077	1.21479585961597	2.20901610920833e-15
HIST1H2AG	0	1.78186162193352	1.63311728844108	1.94415359030969	1.42013159860471e-38
HIST1H2AI	8.88178419700125e-16	1.12415702704839	1.07488903384973	1.17568323953982	3.08318857394333e-07
HIST1H2AM	2.1094237467878e-15	1.11855861150734	1.07764141497825	1.16102940179082	3.80056685139096e-09
HIST1H2BD	0	1.1898119281461	1.14411731368783	1.23733152835147	3.37560178743799e-18
HIST1H2BG	0	1.11725215621534	1.07982704866295	1.15597435914708	1.79466365722038e-10
HIST1H2BH	0	1.21766795667913	1.17183129416652	1.26529753907769	8.32093392950066e-24
HIST1H2BJ	0	1.23092459709597	1.18445467541733	1.27921768150565	3.62693488557339e-26
HIST1H2BK	0	1.62100562636459	1.52617856369759	1.72172464166933	1.37589426788628e-55
HIST1H3E	0	1.22454835166643	1.16360599649506	1.28868248366349	7.39034291924349e-15
HIST1H3H	0	1.14502232059711	1.10497907512238	1.18651668993858	8.90040999099259e-14
HIST1H4H	0	1.16365963464714	1.12146744741173	1.20743918910201	8.71111720082168e-16
HIST1H4I	0	1.43265089009449	1.33002340544192	1.5431973335887	2.53922983336761e-21
HIST2H2AA3	1.4432899320127e-15	1.32319478645951	1.23791340501023	1.41435130747223	1.73906984366415e-16
HIST2H2AA4	0	1.32476215257023	1.26132690192173	1.39138771892413	2.79614624494982e-29
HIST2H2BA	2.41029418646121e-13	1.36692044824683	1.25767813401444	1.48565158390029	1.91161250280211e-13
HIST2H2BE	0	1.57971827669473	1.46258689890281	1.70623012936558	2.80819256120598e-31
HIST2H2BF	4.30314894828143e-10	1.10647701392796	1.06500802429832	1.14956071167404	2.08536331872346e-07
HIST2H4B	3.6535774405877e-11	1.12633779075979	1.08153699298997	1.17299438402605	9.19210607291818e-09
HIVEP3	0	1.93684377178455	1.72495446575504	2.17476105646566	4.93856050298364e-29
HJURP	0	1.62803322476031	1.51655106205203	1.74771047757344	2.46230109443285e-41
HK2	0	1.63409216638262	1.52093585590466	1.7556672083615	5.09750553313442e-41
HK3	0	1.38455633808217	1.30394067100912	1.47015604002898	2.14122119456716e-26
HKR1	0	1.7798996899571	1.56171383566239	2.02856812430407	5.5648783238082e-18
HLA-B	6.25943741283663e-13	1.21474779328366	1.15096940778523	1.28206031481497	1.5522866087862e-12
HLA-DMA	0	1.30684558368574	1.23543930459147	1.38237902360057	1.01198954685676e-20
HLA-DMB	2.36255459640233e-13	1.31994160297689	1.24125299157986	1.40361863946179	8.64279050308602e-19
HLA-DOA	2.55351295663786e-15	1.30862453659864	1.22733783844238	1.39529486026549	2.0237187982358e-16
HLA-DOB	4.10197031897042e-09	1.28907805566517	1.15105538853659	1.44365097470258	1.10938391692851e-05
HLA-DPA1	0	1.27778606073753	1.21674554444144	1.34188879875016	9.68970037539076e-23
HLA-DPB1	2.14861461955707e-12	1.19748868336094	1.14372464533851	1.25378005328643	1.47473548910399e-14
HLA-DQA2	2.35644836976689e-10	1.37877069021429	1.26296049601454	1.50520037815347	7.20918243957782e-13
HLA-DRA	0	1.27760789238404	1.21942582931624	1.33856597706909	6.89995964816754e-25
HLA-E	3.40279215915729e-09	1.28403936029737	1.1764521472506	1.40146548471697	2.14780465401235e-08
HLA-F-AS1	2.34901209594796e-10	1.69779267073532	1.35184408050465	2.13227249678567	5.28617843289994e-06
HLCS	1.73225878086214e-11	1.81369798513176	1.58475553793308	2.07571470963992	5.25514743717128e-18
HLF	0	0.662113580838722	0.613868576170887	0.714150244773299	1.24132973775329e-26
HLX	2.1094237467878e-15	1.48039979036034	1.35754668567698	1.61437066026649	6.95737141255212e-19
HM13	3.50609541399649e-11	1.2272014867434	1.14554406229598	1.31467966936751	5.61972118289877e-09
HMG20B	0	1.58834325761785	1.44208611342833	1.74943387952226	6.13253866605856e-21
HMGA1	1.9324430944323e-11	1.43325978416477	1.31031823973407	1.56773640678385	3.64270849554091e-15
HMGA2	0	1.31545322398247	1.22149903955571	1.41663409339664	4.10886141741062e-13
HMGB2	0	1.40915388573439	1.32480309569839	1.49887532730555	1.27384316173048e-27
HMGB3P22	4.44089209850063e-16	0.615954299586363	0.556693853126325	0.68152306164019	6.05828270029115e-21
HMGCL	1.50435219836709e-13	1.49532580725096	1.33901767068421	1.66988033002447	9.16974673871692e-13
HMGCLL1	0	0.589075945432479	0.531291572305168	0.653145066806838	9.54602027188949e-24
HMGN2	0	1.3819876086784	1.28236196334275	1.48935308839176	2.35049777938412e-17
HMGN2P5	4.44089209850063e-16	1.36518076022684	1.27202075413555	1.46516360054212	6.02832202042484e-18
HMGN4	1.01585739820109e-10	1.38796934851401	1.28221247357066	1.50244904968805	5.16685648254028e-16
HMGXB3	1.32282074183365e-10	1.64544051413523	1.47912622125999	1.83045533683479	5.18097672184727e-20
HMMR	0	1.69352401914273	1.55561665453648	1.84365704433006	5.32549592681096e-34
HMOX1	0	1.27957933001988	1.22104947994054	1.34091475301546	5.71794365612942e-25
HMX1	1.11117226531121e-10	0.822826512463924	0.785675499482526	0.861734227501645	1.30934158252836e-16
HN1L	0	1.88282498404639	1.71205544974675	2.0706279817477	6.86851130806477e-39
HNRNPA2B1	6.55031584528842e-15	1.5938779938335	1.42127434596432	1.7874431255586	1.56605918493389e-15
HNRNPAB	3.33066907387547e-16	1.76257379681769	1.57722008342552	1.96971013866438	1.55953489905789e-23
HNRNPCP1	1.11022302462516e-15	2.33289116091673	1.94996065778509	2.79102101211892	2.04520088972434e-20
HNRNPD	1.53621559917383e-12	1.36348725392791	1.24570545265628	1.49240535767074	1.74029480111034e-11
HNRNPH1	9.52016243616072e-13	1.53078658275719	1.39633115628094	1.67818898218294	1.11204622682299e-19
HNRNPL	1.11022302462516e-16	1.70286202331136	1.5180616311255	1.91015898892469	1.06560018801424e-19
HNRNPR	4.58455495788712e-12	1.69883523303214	1.50269308797068	1.92057924009542	2.53494982162427e-17
HNRNPUL1	4.05231403988182e-14	1.55379301318368	1.39746803737091	1.7276049707444	3.76837465276616e-16
HOGA1	1.24344978758018e-14	0.648339661325631	0.585183334910486	0.718312179057754	1.16130316061661e-16
HORMAD2	1.26315624626727e-11	3.07335678933511	2.1891622703794	4.31467419403097	8.77930422741948e-11
HOTAIRM1	0	1.35482278378623	1.29551780104213	1.41684257367189	2.40424823526882e-40
HOXA-AS2	0	1.55798294055957	1.4682318830717	1.65322036053082	1.41492488181075e-48
HOXA-AS3	0	2.3965357085489	2.09026766861214	2.74767843783536	5.21020900120796e-36
HOXA1	0	2.61899762744326	2.25603717169685	3.04035264072993	1.12962612509985e-36
HOXA10	0	1.52497415716783	1.44205416342608	1.61266215861449	1.62509771980956e-49
HOXA11	0	1.68939594764284	1.53069497470665	1.86455088379644	2.04758903576659e-25
HOXA11-AS	0	1.49679861143598	1.37876690201493	1.62493462812499	6.32931185733245e-22
HOXA13	2.55351295663786e-15	1.46606018807282	1.28600577612167	1.6713241223022	1.050713640298e-08
HOXA2	0	1.70010600377771	1.57364411283657	1.836730681673	2.82304735497272e-41
[truncated: 3,113 more rows]
