# Supplementary material for: RAB42 Promotes Glioma Pathogenesis via the VEGF Signaling Pathway
Source: Front Oncol. 2021 Nov 29;11:657029. doi: 10.3389/fonc.2021.657029 (PMC8666624; doi:10.3389/fonc.2021.657029)
Supplement: Supplementary Table 2 — Results of independent prognostic analysis filtering. [file Table_2.xls]

id	HR	HR.95L	HR.95H	pvalue
A1BG-AS1	1.00336686499971	0.85876420720064	1.17231838185371	0.966233752260127
A2ML1	0.956185592317612	0.846098662668007	1.08059606674326	0.472808547959246
AAED1	1.49466073027579	1.25255779228021	1.78355898019018	8.28853541578521e-06
AAGAB	1.13338111426556	0.908002972396515	1.41470104088261	0.268368680696583
AATK	0.975783380414148	0.91306447092494	1.04281048689577	0.469532055567606
ABCA13	1.26037465720921	1.11229291355184	1.42817081470257	0.000284687489587318
ABCA17P	0.78306201471964	0.669506474802572	0.91587780249265	0.00221890516619321
ABCB4	1.35306124452747	1.1894943915127	1.53912010389052	4.23063144420304e-06
ABCB7	1.29728254571197	1.09243037294841	1.54054852838516	0.00299616631283532
ABCC1	1.34658199966122	1.18107651005554	1.53527994704284	8.69799311478537e-06
ABCC3	1.11770300380014	1.05168231277872	1.18786822743373	0.000340808966949619
ABCC8	0.91498839369184	0.858985734701866	0.974642216708462	0.00583306890645041
ABCD1	1.13287318128447	1.00035254445774	1.28294934819133	0.0493544001042889
ABCD3	1.37112840305893	1.19096627583465	1.57854436000498	1.12553629249856e-05
ABHD14A	0.801007014186247	0.718640112453384	0.892814394377667	6.12742577683382e-05
ABHD15	1.18093463238652	1.00043598934341	1.39399883733207	0.04940097300851
ABHD6	0.948990651551618	0.837766875492199	1.07498074115578	0.410407171948205
ABI3	1.04306951326644	0.944627150298586	1.15177084330254	0.404447811581841
ABLIM1	0.827070401437482	0.725389414267731	0.943004454544584	0.00455739431297992
ABLIM2	0.830219082107017	0.754211756203145	0.913886211167685	0.000145797747553918
ABLIM3	0.845370259414137	0.759892097853855	0.940463623085826	0.00201124362277786
ABRACL	1.21831239819387	1.08620731552454	1.36648416778166	0.000746060702168119
ABT1	1.32415669361938	1.09909124689814	1.59530971992128	0.00313664414318246
AC000123.4	1.75206131169683	1.3953271892411	2.19999930024611	1.37996272067859e-06
AC002429.5	0.950501499419472	0.773123865306568	1.16857484413629	0.630007825757821
AC002454.1	1.25682166107817	1.16243953329522	1.35886697115121	9.52067734765252e-09
AC002456.2	1.18969328986024	1.08774923806193	1.30119155630049	0.000144602251871395
AC003090.1	1.23682955084744	1.06528818805187	1.43599389818354	0.00526760681652612
AC003102.3	0.606632984911709	0.450369624166582	0.817114562430555	0.0010053783905156
AC003986.6	1.54142637973489	1.15128104269277	2.06378390335112	0.00365977258251627
AC004019.13	0.964678560368276	0.798286758767843	1.16575242494389	0.709691178290964
AC004067.5	1.451039071266	1.20560352859691	1.74644013259559	8.22646162021924e-05
AC004797.1	1.27500134064547	1.13894703849003	1.42730817475319	2.44588931422121e-05
AC004899.1	0.976397257121358	0.814635839023732	1.17027947709325	0.796048599123853
AC004980.10	1.56783866180518	1.24244588615326	1.97845080968606	0.000151229955722973
AC005083.1	1.18834066414493	0.981429279368573	1.43887446986394	0.0770756033330539
AC005264.2	0.960061221086081	0.551742688032551	1.67055688861058	0.885328183519332
AC005330.2	0.780604354176504	0.668489925877502	0.911521825791847	0.00174193761570379
AC005682.5	1.11122732746179	0.920781628556647	1.34106300017464	0.271539413969247
AC005740.3	0.878797534771381	0.734067387166727	1.05206295855349	0.15937146228142
AC005789.11	1.03186866342047	0.936761253430272	1.13663212974511	0.524865842704326
AC006126.4	1.02441332560347	0.911301674347042	1.15156450516334	0.686175386844303
AC006262.6	0.933163468588307	0.807871736881241	1.07788652499397	0.347026110561877
AC006978.6	1.30067180164509	1.1026096854917	1.53431187650076	0.00181559561528009
AC007375.1	0.568276330703873	0.427881932546357	0.754736209861514	9.47982919206564e-05
AC007879.7	1.14924862665938	0.898240437229915	1.47039962924804	0.268550255324586
AC008964.1	1.09690690798832	0.997912352233171	1.20572188739815	0.0552813026761566
AC009005.2	1.17960276483933	1.07292357678924	1.29688890515445	0.000637009045549826
AC009014.3	0.846134341270387	0.745636140027946	0.960177873688148	0.00960100956154048
AC009093.1	2.87739989969144	1.41027056531056	5.87080974842657	0.00367435568354167
AC010441.1	1.06244515067141	0.969592814920318	1.16418942138919	0.194226828813157
AC010642.1	1.59526253494237	1.11912948361331	2.27396614301876	0.00981554370460733
AC011899.9	1.00051080107598	0.853453069434675	1.17290791833789	0.994976617147354
AC012307.3	1.29451830667343	0.994644488074667	1.684800616104	0.0548550072345786
AC012314.8	1.45537329381088	1.08502959246666	1.95212318543562	0.0122575652024971
AC012363.7	2.60099856479355	1.91586214562039	3.53114839161219	8.89517505739651e-10
AC012593.1	0.647365275091511	0.487411071198598	0.859811818315368	0.00267271277957464
AC016773.1	1.45243659390864	1.20608302159187	1.74911015374429	8.28902910462959e-05
AC017002.1	0.922117312809774	0.693609470699088	1.22590647115372	0.576792932014912
AC017116.11	1.06417115524688	0.961533955428826	1.17776417698575	0.229388060563468
AC018766.4	1.10140031093092	0.967458730653207	1.25388567644605	0.144317108632778
AC018766.5	1.17483595903698	1.06070892533173	1.3012424970542	0.00199920675856424
AC053503.11	0.824335381906384	0.722873590290946	0.940038245952856	0.00394294066048903
AC062021.1	0.791803403443065	0.728034180066605	0.861158235244758	5.06125335744036e-08
AC064875.2	1.10867371984596	1.01097146984359	1.21581810539839	0.0283946780052568
AC068831.10	0.588344025231782	0.423114726122976	0.818096536600641	0.00161257470251754
AC068831.6	1.88086031397419	1.17330262037522	3.0151091962547	0.00869668995926261
AC069278.4	1.08970275644172	0.923052109190535	1.28644102058118	0.310374558281918
AC072062.1	1.43787369701318	1.03168208281191	2.00399018554952	0.0320239469194668
AC073283.4	1.01795913352995	0.881152910838336	1.17600564532114	0.80899204412508
AC078883.3	1.08486462227981	0.869750535112109	1.35318255196316	0.47005987371182
AC079210.1	1.96993410995842	1.05735072605033	3.67015437921299	0.0327102449508236
AC079776.7	0.889943048562809	0.735274471297217	1.07714691669898	0.231298564039554
AC083799.1	1.29024477293469	1.10567937239242	1.50561873148021	0.00121455007640818
AC083899.3	1.84025083239493	1.35322434666268	2.50255852585129	0.000100845131155441
AC084219.4	1.41438142756749	1.22292209669869	1.63581541951705	2.98619990414945e-06
AC090425.1	0.828469325313111	0.740515155492151	0.926870190156475	0.00101565858884522
AC091878.1	0.449503712853047	0.324816376861233	0.622054804690452	1.40776398154626e-06
AC092162.1	1.00147031634698	0.560851465940003	1.78825028627348	0.996037005008011
AC092295.7	1.3810828919263	1.16550509667291	1.63653506090741	0.000192473251591181
AC092301.3	2.59163029567887	1.80235035451304	3.72654937629774	2.7625921467046e-07
AC093157.1	2.14328586574578	1.59398528082866	2.88188000074727	4.5095909252272e-07
AC093673.5	1.20343949269508	1.08372687287987	1.33637602685777	0.000532147730190947
AC093802.1	0.118774864824997	0.0315618984650329	0.446977818201457	0.00162797190269575
AC093818.1	1.10985550112501	0.876446882460487	1.40542371480564	0.386916947997112
AC096559.1	1.01926802599878	0.896353467248297	1.1590375301529	0.770989384895665
AC097724.3	1.1025212316491	0.956169913436003	1.27127307516814	0.179220500204983
AC098614.2	1.06690993949895	0.926549933531818	1.22853262172575	0.368151872634838
AC099522.1	1.21137712147708	1.12104555963147	1.3089874161051	1.23601101809248e-06
AC104655.3	1.10217825350234	0.944552052206423	1.28610900760394	0.216635990178681
AC105053.3	0.690958470654999	0.436447368963715	1.09388586601741	0.114766395097103
AC108676.1	0.903125791026812	0.450988634230463	1.80855155210187	0.773661380563713
AC109642.1	0.648222495948642	0.272236926529534	1.5434805616214	0.32738430737319
AC112229.7	0.855388556705332	0.788542784184329	0.927900930194032	0.000168273918919625
AC114730.3	0.973565486439424	0.885485860562344	1.07040642725125	0.579775475296416
AC123886.2	0.71698353125363	0.607163039205809	0.846667782612955	8.77499299757185e-05
AC124789.1	1.04712947717499	0.877668455920558	1.24931018606416	0.609152717708639
AC129929.5	0.761137816771032	0.55908551274376	1.03621138969575	0.0829213064952859
AC131056.3	0.796000454316709	0.716063021643323	0.884861672954836	2.38558044565268e-05
AC140912.1	0.784753675856759	0.666505492760222	0.923980880067923	0.00362839659691278
AC144652.1	0.909531865312681	0.789226057823435	1.04817650889606	0.1902080455613
AC145676.2	1.13808819836329	0.908762300514175	1.42528441873189	0.259889569696092
AC147651.4	1.12851374807979	1.01036103283755	1.26048337001716	0.0321420601386733
AC174470.1	1.2803747203174	1.07301786795138	1.52780254028551	0.00611080363469892
ACAA2	1.09846080418159	0.978700123238688	1.23287625052131	0.11084129874872
ACADL	1.17888826588792	1.01314712010972	1.37174307251421	0.0332601305234578
ACAT2	0.886706847713563	0.782759130617939	1.00445846369295	0.058752853011521
ACBD4	0.8008027686082	0.701521768257952	0.914134248183097	0.00100418703997011
ACCS	1.14915803877733	1.03519981972857	1.27566115538237	0.00907518668508333
ACN9	1.19340307892722	1.08248598397659	1.31568531128785	0.000381628462230656
ACO2	0.906789097717385	0.797138874896631	1.03152222734807	0.13675391930124
ACOT9	1.22230747445288	1.06456662339409	1.40342138225227	0.00440666919155498
ACP2	1.1099884306285	0.9227213081825	1.33526158462293	0.268358014087036
ACP5	1.02705764791718	0.961764511400174	1.09678346377065	0.425651576529659
ACSL6	0.905273480074003	0.835120824199263	0.981319169607672	0.0155983317985992
ACSS3	1.09902628704805	0.994079176951242	1.21505289279575	0.0651840048104459
ACTA2	1.01710687475334	0.953496956563775	1.08496035309717	0.606704954499681
ACTG1	1.27155024198246	1.1017464873217	1.46752454987727	0.00102025273972469
ACTG2	1.00655415841515	0.94424613523754	1.07297370464529	0.841189748777859
ACTL10	1.03963236221207	0.836045819740357	1.29279451321736	0.726684575345104
ACTL6A	1.47109567799358	1.29687100724253	1.66872609667854	1.94992810031282e-09
ACTL6B	0.86973618592844	0.820386024644947	0.922054996537426	2.83039925585769e-06
ACTN1	1.11372166236019	1.03315256829877	1.20057383514306	0.00493517073375944
ACTN4	1.13074951124834	0.997576919454808	1.28170011981344	0.0546035198960628
ACTR3	1.15501568147007	1.04138160947835	1.28104934089438	0.00638482596382279
ACVR1C	0.702263834345063	0.561147355920956	0.878868068833062	0.00201435598122061
ACVRL1	0.989765030814437	0.87183900062059	1.12364188287721	0.873716385480659
AD000671.6	1.28250113430905	1.00246038468142	1.64077222864693	0.0477581183046689
AD000684.2	1.09398296195451	0.855479382509744	1.39898020398303	0.474050523285016
ADAM12	1.11652203148173	1.02291988304591	1.21868923211472	0.013616198771097
ADAM19	1.02291566335008	0.919604303684247	1.13783335956006	0.676613293077504
ADAM22	0.923546743787277	0.826980481400402	1.03138901962441	0.158105247678216
ADAM29	0.760366911491952	0.555238678920189	1.04127803418918	0.0876717744645684
ADAM32	1.21845816630274	1.03415873906199	1.43560195060232	0.0182069401168508
ADAM9	1.12320704899288	1.03272775440809	1.22161341120379	0.00669781194438063
ADAMDEC1	1.0776077448342	0.982125767247375	1.18237245213642	0.114346197927679
ADAMTS1	1.06836994891973	0.97904550016622	1.16584402620814	0.137655451514431
ADAMTS14	1.07520650038021	0.980641426356684	1.17889066012123	0.122641102733948
ADAMTS15	1.20994367831781	1.10957897598514	1.3193866650199	1.60705492648008e-05
ADAMTS19	0.891474671390162	0.727344173087175	1.09264240937962	0.268489610671874
ADAMTS19-AS1	0.924004795397138	0.667435671954939	1.27920172354011	0.633896703740414
ADAMTS7	1.27129609792276	1.14849602049818	1.40722626787387	3.63387753438804e-06
ADAMTSL4	1.15129718882878	1.03394745041654	1.28196574832797	0.0102111008686094
ADAP1	0.941244741079414	0.883007984258251	1.00332236899745	0.0631436664859935
ADAP2	1.06614383305109	0.957196898454434	1.18749096929609	0.244200159809906
ADARB2	0.906858350780665	0.844207558051337	0.97415861838401	0.00743373123108328
ADAT1	1.41547200271016	1.18736264849118	1.68740442778985	0.000106457201086113
ADCK1	0.935242694058416	0.793575427018139	1.10220007703143	0.424373950713271
ADCK4	1.50368399013878	1.25664677851918	1.79928487531247	8.39791854791839e-06
ADCY3	0.965014876682476	0.832769985295876	1.1182604184367	0.63580578735694
ADCY5	0.865243811496632	0.773642634390631	0.967690791657183	0.011238081499483
ADCYAP1R1	1.02200094118872	0.948643741030621	1.10103074380261	0.566881046237306
ADHFE1	0.959239658467637	0.853185089105452	1.07847726610161	0.486342561275689
ADIPOR1	1.17982415958742	1.00459622274851	1.38561644571765	0.0438140667802363
ADM	1.04257715375614	0.974232520952423	1.11571631839145	0.228078749230675
ADM2	1.27772205897268	1.06581064275771	1.53176708365495	0.00807729524286483
ADPGK	1.29007596288293	1.07183276971417	1.55275714368403	0.00706880612113485
ADPRH	1.16662450128635	1.00321811827396	1.35664687689577	0.0453175500285133
ADPRHL2	1.50130122592255	1.27930009852355	1.76182693455413	6.46158470931607e-07
ADRA1A	0.883205723704948	0.776140672680424	1.00503990815382	0.0596035388140872
ADRBK2	0.855024209336555	0.735889545305287	0.993445827863087	0.0407704434040878
AEBP1	1.10774802126827	1.04753919340846	1.17141743845501	0.000332201951760118
AF064860.7	1.6604854478383	1.12772741378829	2.4449276383383	0.0102025150050132
AF131216.5	0.867845255599788	0.783853080510216	0.960837440578567	0.00634906261901729
AFAP1L1	1.2202380851202	1.09422597122334	1.36076187509345	0.000344712548544764
AGA	1.18723742835948	1.03785826665398	1.35811676467338	0.0123641261480881
AGAP2	0.942577438898678	0.884830127223953	1.00409355534514	0.0667552493425045
AGAP2-AS1	1.11262968673621	1.02857090136529	1.20355808059853	0.00774906482846254
AGBL2	1.21441352407565	1.09369173392449	1.34846059608207	0.000276420075150534
AGBL5	1.55506657424471	1.25033492716072	1.93406742289807	7.26012518546066e-05
AGL	1.27031484287399	1.07557187631582	1.50031795694901	0.00483233184865813
AGPAT6	1.2037771363583	1.00644277424982	1.43980306788839	0.0423294633490508
AGTR1	1.32065909289122	1.04915686324784	1.66242103610416	0.0178540111583588
AGTRAP	1.23597160815543	1.11459550253748	1.37056520745736	5.89139220034845e-05
AHCY	1.13027109759906	0.968314358688909	1.3193161317958	0.120683586722647
AHR	1.11912610615914	1.02182261588778	1.22569536239788	0.0153029378364898
AIDA	1.35217459936482	1.17083181639365	1.56160442650005	4.01528263694537e-05
AIFM3	0.920653709663257	0.869839854307481	0.974435982576967	0.00431788609497202
AIG1	0.9175240268068	0.805975989032688	1.04451044599745	0.193086924053837
AIM1	1.02671767547236	0.900153297369674	1.17107740226879	0.694452111528764
AJUBA	1.27112282102942	1.12731664212007	1.43327363916419	8.99066170913083e-05
AK2	1.43615829617358	1.22366855931222	1.68554682227635	9.38863939645392e-06
AK4	0.996980402118851	0.904261827749621	1.09920588451986	0.951580195491218
AKAP12	0.97865161897653	0.905769569853961	1.05739806591185	0.584712682682968
AKAP2	1.14702604325047	1.03121433716533	1.2758441155031	0.0115377954339306
AKAP8	1.22128432724191	1.0238795510956	1.45674889821826	0.026262250296582
AKIRIN1	1.38821340281707	1.18655011486032	1.62415091248616	4.20771733297825e-05
AKR1B10	1.28901708884293	1.02329668709043	1.62373735426963	0.0311236345660149
AKR1C1	0.862816124579739	0.796335176406429	0.934847143377792	0.000309973932040295
AKR1C2	0.817305114589781	0.73065341543859	0.914233255083933	0.000418512377535731
AKR1C3	0.865011698807422	0.798345253929728	0.937245177309671	0.000394416152208916
AKT2	1.1086884583631	0.977183608631659	1.25789062244788	0.109228112086451
AL009178.1	1.37634453381809	1.1854134445639	1.59802833725058	2.76160673597132e-05
AL022344.7	0.956318462428053	0.78116213525781	1.17074927252961	0.665226828290879
AL022476.2	0.834159229977378	0.550377922251437	1.26426150618478	0.392715173053099
AL031663.2	1.60799481146863	1.17904142891521	2.19300802355095	0.00269692052804339
AL049840.1	1.30195074970114	1.1013478741022	1.53909204757776	0.00199686055158079
AL357673.1	1.91640643559551	1.53472514625375	2.39301065428993	9.46631287191503e-09
AL512652.1	0.986820224932094	0.782876967455253	1.24389169284213	0.910569136880154
AL590822.1	1.10752603747793	0.684611315588139	1.79169390829861	0.677320237673779
ALCAM	1.02063094875066	0.927086289071723	1.12361443139311	0.677147272749838
ALDH16A1	1.04079867895044	0.947394479398336	1.14341165550483	0.404542618939654
ALDH2	0.852607805367354	0.770115747128363	0.943936119322295	0.00213161421359462
ALDH3A1	1.05354121276027	0.955696665144676	1.16140311823349	0.294281622658144
ALDH3A2	1.24681099829784	1.08055016262284	1.43865386286473	0.00252029329456067
ALDH3B1	1.07829398574091	0.953514257079938	1.21940276304389	0.229618324858842
ALDH5A1	0.883030347533248	0.782089041653798	0.996999770020881	0.0445925057001237
ALDOC	0.872140179554775	0.811626603202978	0.937165550996128	0.000192437304474347
ALG12	1.22742368935875	1.06606461274405	1.41320600570461	0.00437759810486335
ALG14	1.22421290076672	1.03955639870049	1.44166995487415	0.0153084527537647
ALG2	1.44216581890291	1.26534453458529	1.64369639443185	4.10150113502726e-08
ALG3	1.33696562843979	1.1355230869277	1.57414420913769	0.000491617649874292
ALG6	1.30224787681364	1.12731145156388	1.50433097287627	0.000333057613954321
ALOX12B	0.696797834665023	0.511152238447625	0.949868132962532	0.0222939327238376
ALOX5	1.04675525367579	0.966590525008461	1.13356848918861	0.260983138193071
ALOX5AP	1.03335133100718	0.966941471539357	1.10432224154619	0.333029008796127
ALPK1	1.11920193456217	0.98619808246099	1.27014338458445	0.0810450680762202
ALPK3	1.18592736413983	1.04284613702086	1.34863971115952	0.00933563194758787
ALPL	0.944340225140882	0.858255508540978	1.03905940823513	0.240276300539591
AMER2	0.902449162160352	0.829715647633356	0.981558552748669	0.0166602017737641
AMER2-AS1	0.887681327982958	0.712524042653388	1.10589691418021	0.288053482510757
AMER3	0.703516649501317	0.611670636448788	0.809153892034177	8.35846210991809e-07
AMIGO2	1.06582027830701	0.951768266208393	1.1935393372337	0.26963765253672
AMMECR1	1.56093483387021	1.26057287819591	1.93286528508885	4.43424101905887e-05
AMZ1	0.789045267034113	0.688845589838691	0.903820018031514	0.000627586343458232
ANG	1.11093662137583	1.005318197186	1.22765128510411	0.0390151304412837
ANGPT2	1.11193490245403	1.0269079630948	1.2040019862825	0.00894448101615142
ANK1	0.804685563824319	0.717712299886504	0.9021983554269	0.000196459333636173
ANK3	0.973581475917945	0.902746595857905	1.049974482983	0.487257975172675
ANKLE2	1.43907005676702	1.20229800844446	1.72247031413019	7.22686981659044e-05
ANKRD11	1.42682724202107	1.16782627362215	1.74326954664162	0.000505165786962446
ANKRD13C	1.2615726769694	1.05403099411403	1.50997990397193	0.0112838056957485
ANKRD19P	0.919782987017026	0.827577859720987	1.02226120874136	0.120792561357054
ANKRD22	1.13707849201598	1.03304244125606	1.25159184692669	0.00869086927849583
ANKRD24	0.811394459593584	0.738977389768448	0.89090813626308	1.17743179883325e-05
ANKRD27	1.24165514626723	1.06214849884535	1.45149901725404	0.00659260527922866
ANKRD29	0.705076900854154	0.624224600634891	0.796401544592235	1.87278944303658e-08
ANKRD32	1.32479551621853	1.11318354667574	1.57663411845591	0.0015374776046036
ANKRD35	0.974430623570097	0.868611002306774	1.09314185248584	0.658769414160485
ANKRD46	0.907796469726373	0.798655135011559	1.03185266621461	0.138826096419039
ANKRD52	1.34736112296508	1.16732894759042	1.55515889452155	4.61759764753493e-05
ANKRD53	1.32161562846868	1.15035485063089	1.51837310761521	8.21331581459099e-05
ANKRD55	0.781681451944625	0.635577957377577	0.961370489995243	0.0196411029800234
ANKUB1	1.04802887298429	0.893937181152569	1.22868199440209	0.563161082940477
ANO1	1.06099614303976	0.928649747109017	1.21220386808881	0.383749891289862
ANO4	0.877878723727279	0.784771191910262	0.982032803341183	0.0227913572509611
ANO5	0.829972208089317	0.723163425356758	0.952556285407857	0.00801312287740295
ANO6	1.21611522694908	1.09508562088716	1.35052110721651	0.000253953369053737
ANP32E	1.12022083483452	1.03093850456685	1.21723527954229	0.00738456456964164
ANPEP	1.03433838577312	0.941824793282862	1.13593940604877	0.480045574953903
ANTXR2	1.19743286392898	1.0781753790202	1.32988147523845	0.000762146182409709
ANXA1	1.15518348240871	1.09045914000978	1.22374954646897	9.41000967387164e-07
ANXA2	1.10570793849015	1.03956179763969	1.17606288343416	0.00140933586976195
ANXA2P2	1.07836148459536	0.917463078176897	1.26747715425175	0.360145627410753
ANXA2R	1.20460470176812	1.06609170853553	1.3611141292105	0.00281867001834116
ANXA5	1.18424708174107	1.07749189488619	1.30157930400058	0.000450786664437349
AOX1	1.00872514060727	0.842195581910453	1.20818302915455	0.924817093283586
AP000330.8	1.27700450771305	1.02526749196967	1.59055127124589	0.0290567891646331
AP000695.6	1.19599540271971	0.753294466136438	1.89886567289293	0.447952057530258
AP000783.1	0.898092580896058	0.753679509097692	1.07017674505463	0.229488759762754
AP001007.1	1.11563317052542	1.01052104817093	1.23167881899088	0.0302150619259123
AP001046.5	1.53740267855319	1.11978223288202	2.11077379745455	0.00782465049652917
AP001469.9	1.0281094161043	0.85205665921799	1.24053836097289	0.77236854660883
AP1M1	1.11774145982599	0.938516318742193	1.33119259203539	0.211911859646452
AP1S2	1.17906789835899	1.05899155850662	1.31275938677087	0.00264808441288108
AP3B2	0.842196486567857	0.775099086357977	0.915102255274311	5.02587255132381e-05
AP5S1	0.930571139521609	0.759754706049698	1.13979240775364	0.486793825946019
APBB1	0.809965479512421	0.723312065333098	0.907000048035513	0.000261443182228254
APC2	1.00756716844355	0.912167233204017	1.11294460266838	0.88191520938161
APCDD1L	0.995246493516145	0.883223581628367	1.12147773616959	0.93766301950727
APCDD1L-AS1	1.05673694196367	0.945480539816494	1.18108508582046	0.33091932126837
APEX2	1.28514794766567	1.07991976680358	1.52937773541993	0.00471195949321305
APH1A	1.2284185515927	1.06058140576677	1.4228159476416	0.00605739620795071
APIP	1.22249331746496	1.10792841153669	1.34890476287509	6.29627051238981e-05
APITD1	1.36701321582973	1.1861382915453	1.57546986348325	1.5791997139475e-05
APLN	1.08164932757328	1.00642972294461	1.16249077423573	0.0328228711032303
APOBEC3B	1.14270809684273	1.01682757012872	1.28417229523452	0.0250781056751627
APOBEC3C	1.09075408202373	0.985404044739818	1.20736714427183	0.0936906879685424
APOBEC3D	1.10507705867709	0.885824721696145	1.37859700198489	0.375885784794403
APOBEC3F	1.10651649086428	0.959969610173229	1.27543490083363	0.162606583255149
APOBEC3G	1.09239077323701	0.975851552103716	1.22284746986448	0.124716935931428
APOBR	1.15458603618528	1.02453688621029	1.30114291920224	0.0183964393843524
APOL1	0.991455379860377	0.906559135300583	1.08430187505436	0.850966124112751
APOL2	1.03229837986029	0.911300972373885	1.16936114123333	0.617256138203496
APOL4	1.18740479303206	1.10117664572241	1.28038507535777	7.98543520173267e-06
APOL6	1.13185340360632	1.0047545638054	1.27502991616502	0.0415486121589716
AQP3	1.07805515169333	0.954438672468779	1.21768212418126	0.226462686614954
AQP7	0.551775216089859	0.364481153976924	0.835313117753918	0.0049462899414667
AR	1.14806594737847	1.00358823244283	1.31334284014246	0.0442030618766975
ARAF	1.1410205277282	1.02655223227864	1.26825289913134	0.0144526339060822
ARAP3	1.35006360092099	1.22032866490659	1.49359084888108	5.78683950435377e-09
ARC	1.01539424544629	0.952602894746302	1.08232452302175	0.639023868558696
ARCN1	1.22625347105295	1.02239342559572	1.47076217200168	0.0278993451545726
ARF4	1.33080336097359	1.18663880564643	1.49248244465915	1.03339235311485e-06
ARF6	1.08810409635606	0.966595541024777	1.22488721937575	0.162231742761329
ARFGAP2	0.792071457525109	0.644733584277557	0.973079748170627	0.0264297321474806
ARHGAP11A	1.17725251503308	1.07003752461702	1.29521016998703	0.00080985195371233
ARHGAP11B	1.28735432847777	1.13188444199718	1.46417876733619	0.000119814252588491
ARHGAP15	1.01511680037944	0.90319209335606	1.1409113587162	0.801258748459278
ARHGAP17	1.42250600723464	1.20191944382001	1.68357650841171	4.14428528140492e-05
ARHGAP18	1.1152016783405	0.985258679845787	1.26228249373872	0.0845255903796663
ARHGAP25	1.12869114454434	0.980223437424455	1.29964623486264	0.0924967501972327
ARHGAP27	1.19613563125666	1.03704555296979	1.37963124596074	0.0139126654151565
ARHGAP29	1.08350296939085	0.968468361302164	1.21220138064221	0.161370734737325
ARHGAP30	1.03425223988278	0.929189402125502	1.15119446396579	0.537757403859114
ARHGAP31	1.06121527566088	0.927978141826134	1.21358231464357	0.385401389193356
ARHGAP36	0.975807883175199	0.898966438480569	1.05921754595897	0.558408953270036
ARHGAP44	0.80628827544121	0.733323161824626	0.886513364035039	8.62782456829922e-06
ARHGAP9	0.978187753605897	0.877837169659565	1.09000998633451	0.689645449387101
ARHGDIB	1.10941937018016	1.0141868643468	1.21359424204696	0.0233535048368955
ARHGDIG	0.881670880567649	0.836938920479496	0.928793634301989	2.13115368074766e-06
ARHGEF1	1.17087701940061	1.05911249121716	1.29443567697413	0.00205624418322405
ARHGEF19	1.24435827261152	1.08439541341147	1.42791779775739	0.00184528102028247
ARHGEF26-AS1	0.960081042267456	0.862605819882528	1.06857105119798	0.455794235460031
ARHGEF35	0.943162586183792	0.776598578892584	1.14545105818425	0.555037064011516
ARHGEF39	1.36609524015878	1.19351252276299	1.56363353512552	5.97729788635934e-06
ARHGEF4	0.938341487704961	0.849226197038886	1.03680827395395	0.211302206841551
ARID5A	1.17132341684188	1.05336717047377	1.30248842502377	0.00350013641060629
ARL1	1.14464689033555	1.00897422061012	1.29856291349303	0.0358381253693729
ARL11	1.12405908380684	0.923959771879399	1.3674933285446	0.24230516021677
ARL13B	1.33356849590679	1.17870626605633	1.50877702485219	4.86464683904976e-06
ARL2BP	1.358526493995	1.20330471693125	1.53377129576379	7.43520735783651e-07
ARL3	0.85935510033473	0.745994696244982	0.989941607076515	0.0357264246565203
ARL4C	1.09439329294528	0.997378512339153	1.2008446791526	0.0568399380752453
ARL9	1.08801686645089	0.910816268704455	1.29969209197967	0.352344246865866
ARMC10	1.362463457618	1.18180960517024	1.5707324303537	2.02945715676039e-05
ARMCX2	1.12990962061997	1.01165442511035	1.26198800606275	0.0303576926270867
ARMCX6	1.18613221755961	1.05949323270908	1.32790809237683	0.00304500038489109
ARNTL2	1.08551677333261	0.946802051859427	1.24455440593129	0.239469919748452
ARPC1B	1.04385458855593	0.951904543996761	1.14468662737361	0.361621060857007
ARPC2	1.15754160911393	1.01677839417914	1.31779214084479	0.0270021694436213
ARPC3	1.17811367489799	1.05347150711208	1.31750296197995	0.0040662559866358
ARPC5	1.29897982000045	1.14922892227193	1.4682440896394	2.84412838939623e-05
ARPP21	0.846869202657136	0.784442421155138	0.914263975363586	2.09718433291615e-05
ARRB1	0.769466872208978	0.692313297390161	0.855218684458396	1.1672092506913e-06
ARRDC3	1.18349700508584	1.06304400340657	1.31759847810502	0.00209580125818372
ARSD	1.24517036814544	1.08417895351465	1.43006764767133	0.00190834620956097
ARSK	1.35829009404338	1.10507671639696	1.66952389114824	0.00362407357166907
ARTN	1.08604052361496	0.974393977367036	1.21047958662574	0.135884760016426
AS3MT	0.991163097896205	0.871319984996841	1.1274896749152	0.892614534282922
ASAP3	1.40075044979115	1.2292122419521	1.59622704332501	4.27537744850533e-07
ASB13	0.896929443276171	0.803060154924689	1.00177106444927	0.053781595261594
ASB5	1.49853149695697	1.29374784704457	1.73572976565868	6.84625878400041e-08
ASB6	1.34949882231583	1.08696456283046	1.67544291111896	0.00661909656265165
ASB9	1.19287269334427	0.959346500815843	1.48324433488454	0.112603749051102
ASCL5	0.86183938025058	0.69484952927974	1.06896110028402	0.176026816934495
ASF1B	1.20637678000374	1.11057308211507	1.31044499346275	8.82459430900179e-06
ASIC1	0.880009237407894	0.805581059353025	0.961313885092047	0.00458202943518946
ASIC2	0.794441512329531	0.713068243003752	0.885100861950897	2.9969804946972e-05
ASIC4	0.951584023354147	0.899219031168581	1.00699843098973	0.0857109650146607
ASPDH	0.882445611601141	0.826884425903717	0.941740142926316	0.00016387293003421
ASPHD1	0.845488273683255	0.789874367184597	0.90501787453096	1.33273925750229e-06
ASPM	1.3545702767108	1.21780254124242	1.5066979846145	2.29047063565212e-08
ASPN	0.985620539104233	0.878403370166094	1.10592454457504	0.805298449305683
ASTE1	1.45664804945597	1.16354796287106	1.82358064101482	0.00103286101959239
ASTN2	0.984589573744831	0.869159980735977	1.11534890033266	0.807151354352691
ATAD2	1.23389252418378	1.10648201441354	1.37597425118887	0.000157072812822627
ATAD3A	1.1286934027464	0.986609388680615	1.29123928073186	0.0778034352775532
ATAT1	1.15988183153278	1.03517278698701	1.29961478898181	0.0106006846130041
ATCAY	0.949747141163604	0.89396188470819	1.00901352460108	0.0950330159986653
ATE1	0.959518644637418	0.829231154877064	1.11027669907472	0.578894972038478
ATF3	1.05796443206129	0.982882674167978	1.1387816358186	0.133546929227649
ATF5	1.05684269609746	0.947525442294012	1.17877202493945	0.320998945793018
ATG4A	1.40142959660523	1.14577936576874	1.71412138577255	0.00102253568561048
ATG4C	1.23481684537827	1.04238442900807	1.46277380896885	0.0146786478883005
ATL3	1.31270719279179	1.12179413674802	1.53611087592479	0.000690704133802806
ATOH8	0.842810918642063	0.770657751050096	0.921719457975195	0.000180332626492389
ATP11C	1.23341921587765	1.06569425706209	1.42754167249642	0.00490579518790074
ATP1A1	0.930185771261178	0.821706783362969	1.05298579319936	0.252664870710083
ATP1A3	0.914007916845268	0.864861735852292	0.965946853033748	0.00142966930641924
ATP1B3	1.16343121262589	1.03982330790405	1.30173287732944	0.00825698624063697
ATP2B3	0.844942585224586	0.771274977743895	0.925646485270872	0.000294630348072947
ATP5F1	1.25366263923008	1.10626591588878	1.42069821588839	0.000396410850515127
ATP5F1P5	1.16120660126053	0.921426630969318	1.46338376327646	0.205327182500526
ATP5SL	1.13165673297836	0.945565616231578	1.35437133003957	0.177230699442301
ATP6V0A1	0.799911326622471	0.711774276492971	0.898962145150297	0.000178074511675718
ATP6V1G2	0.913777768054428	0.852321007921162	0.979665878970998	0.0111398143162467
ATP7A	1.55060248915105	1.25931822197053	1.90926172385497	3.59864024614345e-05
ATP8A1	0.954769448289997	0.878823787555746	1.03727813504384	0.273738298301086
ATP8A2	0.804865553956868	0.719571620642769	0.900269745724033	0.00014576242241571
ATP8B2	1.30462352377061	1.11725254452146	1.52341791220057	0.0007750327852373
ATP9A	0.857289401601354	0.76486935914727	0.960876663849335	0.00815255043019577
ATRNL1	0.906843946272426	0.83652997344377	0.983068113513597	0.0175646783964854
AUNIP	1.24064278164495	0.995529874990591	1.54610579784183	0.0548489829703214
AURKA	1.23580210337174	1.11935378543821	1.36436474201956	2.75432972253792e-05
AURKB	1.20571584349883	1.12313293295848	1.29437099795011	2.36963233114367e-07
AVIL	1.226985706937	1.14569872876753	1.31403997161383	4.94245309943428e-09
AVPI1	0.801915015481644	0.709918284457065	0.905833398201223	0.000384152818036473
B2M	1.09440376412434	1.01640260013141	1.17839092380783	0.0167921481101472
B3GAT1	0.867670185811256	0.793466172364806	0.948813670407622	0.00185900699843514
B3GNT1	0.83541163580934	0.739613364125435	0.943618159294476	0.00380555775397359
B3GNT2	1.04509323715724	0.908852974256339	1.20175639546705	0.535983974757478
B3GNT5	1.17048658628859	1.03464397218783	1.32416452954775	0.0123820897938046
B3GNT7	1.02903248592194	0.91289135013386	1.15994949117155	0.639511231339004
B3GNT8	1.03859585736978	0.864792110007208	1.24733024557392	0.685264080488374
B4GALT1	1.03353693750228	0.922526931706414	1.15790505888617	0.569355659496459
B4GALT3	1.13109311594027	0.973675670140515	1.31396077375831	0.107164763439268
B4GALT5	1.09550020761619	0.990038946051258	1.21219544915255	0.077375561643172
B9D2	1.18389601851585	1.03304141379722	1.35677985793976	0.0152074890825858
BACE2	1.17109065682983	1.06360908381574	1.28943363438942	0.00130219890603853
BAG1	0.878364569746765	0.791309228287139	0.974997244827354	0.0148734095214182
BAI3	0.942508045398481	0.852620538149515	1.04187194173018	0.24692551941492
BAIAP2-AS1	0.869108962851231	0.734853744125345	1.02789214227573	0.101290588207109
BAK1	1.33220956302411	1.0901786304271	1.62797386618888	0.00504733797558607
BANK1	1.22038969715901	0.959531029894797	1.55216555434914	0.104530703094633
BARD1	1.34905269910498	1.18811538446955	1.53178993282288	3.84907565769087e-06
BARX1	1.23515636327733	1.13871626534717	1.33976416089864	3.54760140971476e-07
BATF	1.03351125873072	0.945935230512305	1.12919520012451	0.46561247344493
BAZ1A	1.39654544576792	1.24160732646073	1.57081803604903	2.59408783256231e-08
BAZ1B	1.37918461018594	1.17888764795456	1.61351269756205	5.93250107981028e-05
BBS12	1.52174977218703	1.21238619828698	1.91005339092711	0.0002936354662718
BBS5	1.152397098315	0.980940959269687	1.35382161347769	0.0843775618505795
BBS9	1.61697263398667	1.37124524456982	1.90673441487998	1.10364239175328e-08
BCAP29	1.02137896852037	0.926593525557806	1.12586044318378	0.670328096726185
BCAS2	1.16848255743924	1.02945788210279	1.32628202744035	0.0159889231689391
BCAT1	1.15841463827876	1.06451150805586	1.26060119033311	0.000651085097668477
BCL10	1.44167036956794	1.1661141437266	1.78234134769009	0.000725162097266787
BCL2A1	1.05219941306475	0.983573330256235	1.1256136891851	0.139235749799989
BCL2L12	1.12985973880115	1.01773455623694	1.254337903278	0.0220429772298965
BCL3	1.0321076726297	0.950252586368561	1.12101378431601	0.453488712745624
BCL6B	1.09170815042909	0.977851433790187	1.21882184197833	0.118429552554903
BCORL1	1.27167867555573	1.0839322225447	1.49194444101554	0.00318978352900427
BCR	0.878257875383054	0.780526566197413	0.988226319355373	0.0310266207490572
BCRP2	0.961677873874558	0.87581533163799	1.05595814516085	0.41284348994205
BDKRB2	0.969880918693012	0.835450869018956	1.12594172958297	0.687879015100196
BEST4	1.08157975804086	0.961448000429223	1.21672183257076	0.191724460897176
BET1	1.2938957506891	1.13362860451357	1.47682072151813	0.000134001657212136
BEX1	0.901696076014433	0.849893410965703	0.956656214778723	0.000608436968539233
BEX2	0.894909990267359	0.840427829386623	0.952924049724564	0.000531010598792315
BEX4	0.98424422036435	0.896458770791832	1.0806260331024	0.738995493288355
BFAR	1.24788388058036	1.04175216660416	1.49480291890193	0.0162162924256333
BGN	1.05008739370596	0.979524467924701	1.12573352736804	0.168494618689729
BHLHE40	1.01051160534011	0.925243602817304	1.10363768138225	0.8161601742595
BICC1	0.9773543798946	0.809436766587621	1.18010649297057	0.811760375570068
BICD1	1.20862958596477	1.07615678412996	1.35740953140984	0.00137851926476105
BID	0.93729681321802	0.821512932343263	1.06939925286723	0.335759850205273
BIN2	1.08294571176753	0.963110924410111	1.21769090653185	0.182933778274071
BIN3	1.49044867042656	1.22181677380573	1.81814269275167	8.29499246551229e-05
BIRC2	1.37977747546028	1.17488019337001	1.62040852550825	8.67555942915055e-05
BIRC3	1.03070704014035	0.928637995427258	1.14399476203436	0.569726637412816
BIRC5	1.19242244754761	1.11102319525876	1.27978542615781	1.06963715649538e-06
BLCAP	0.820985871367491	0.727715474486696	0.926210620243394	0.00134703906070577
BLK	0.900270956784542	0.732109584706979	1.10705803142045	0.319310489752435
BLOC1S3	0.981857946975729	0.772580411386835	1.24782483975858	0.881002617062012
BLOC1S5	1.50453833121652	1.25460243012754	1.80426526821702	1.04785634022912e-05
BMF	1.13762409504793	1.00052883763474	1.29350452775863	0.0490641869756976
BMP1	1.27767922045301	1.13819733735048	1.43425409356297	3.2573470686313e-05
BMP2	0.901115911300703	0.820519632213575	0.989628832412795	0.0294027457518204
BMP8B	1.13963535567428	1.03154563800503	1.25905117141944	0.0101454193556926
BOLA3	1.03982353317326	0.931509448919758	1.16073216583556	0.486550582670047
BORA	1.44593407824727	1.23597195957913	1.69156374659884	4.0953358630313e-06
BPI	0.769792645887772	0.66944003282989	0.885188648127167	0.000241403092759024
BRCA1	1.49537600252842	1.30066377447992	1.7192370794151	1.57437440693683e-08
BRCA2	1.37132378454178	1.1836389953789	1.58876898225883	2.61032505258443e-05
BRD4	1.20908247894495	1.06176807325493	1.37683593782413	0.00418191715860428
BRINP1	0.80539352610654	0.746849285720259	0.868526949542117	1.90141443623198e-08
BRINP2	0.850128266592695	0.779265146228769	0.927435383396107	0.000255810772054902
BRIP1	1.31509726457511	1.15663621373186	1.49526773825696	2.89862927108501e-05
BRIX1	1.2587581138686	1.0787505656936	1.46880292777532	0.00347006059797609
BRPF1	1.5371496618852	1.29778302529679	1.82066573300529	6.4226946401593e-07
BRSK2	0.925731865099914	0.851506582899689	1.00642731750005	0.0703392166539027
BSN	0.813799190301545	0.731506009101988	0.905350214345424	0.000151851617965025
BSN-AS2	0.76468758473776	0.51339429470645	1.13898247074681	0.186905406832942
BSPRY	0.671453739236879	0.544158661168262	0.828526964851116	0.000204104985390176
BST1	1.2276647175008	1.09333676687905	1.37849627329238	0.000521902243105761
BST2	1.02189418949304	0.94684347289952	1.10289373524621	0.577875361534575
BTBD17	1.02895828161759	0.965869971028946	1.09616736938361	0.376545954157127
BTBD19	1.18745865333806	1.06590982610971	1.32286805023064	0.0018179970316212
BTG1	1.25269283296455	1.13253425919608	1.38559988010841	1.1920938731497e-05
BTG3	1.21588066728557	1.09536636858251	1.34965417916924	0.000242207000220498
BTN2A1	1.43647607172967	1.21484924304011	1.6985346259822	2.27258352784084e-05
BTN2A2	1.32169155944382	1.16559698536487	1.49869002771846	1.36362163204326e-05
BTN2A3P	1.41892483583493	1.20661972548	1.66858509539803	2.32372640735604e-05
BTN3A1	1.20503693075972	1.07735479509434	1.34785124743206	0.00109918348714989
BTN3A2	1.15969755350746	1.05225408703043	1.27811184787758	0.00281949594267119
BTNL9	0.950001207174675	0.862600843045463	1.04625714304545	0.297575736513891
BUB1	1.24672418312006	1.13734277654194	1.36662510268212	2.51512499759739e-06
BUB1B	1.18586434994538	1.08811496968684	1.29239491749307	0.00010276511049039
BVES	1.23464205105547	1.09512416050197	1.39193440270348	0.000570674171207993
BZRAP1	0.947962561377099	0.876866785955251	1.0248227349536	0.179102473933832
BZW1	1.34086341223181	1.18142664961189	1.52181660270874	5.59154953025807e-06
BZW2	1.33987570550999	1.18089163284094	1.52026388898776	5.62416446024672e-06
C10orf10	1.13047738456379	1.04530830835591	1.22258582161298	0.00214951455721884
C10orf11	1.12036185627538	0.997269294099378	1.25864768565885	0.0556309532684414
C10orf32	1.00966341524929	0.886092366290442	1.15046720959868	0.885200105404119
C10orf55	1.04566666879969	0.879257983483785	1.24356992234099	0.613603215060317
C10orf85	0.876045076255275	0.763685432895377	1.00493598878984	0.0588039601980704
C11orf21	1.16532049919429	0.951904477106571	1.42658417782649	0.138237725344857
C11orf63	1.12436299463991	0.95773757247353	1.31997760143275	0.152054090806032
C11orf82	1.45919670527427	1.26897950011537	1.6779270464887	1.14107545858437e-07
C11orf84	1.26140528258176	1.07191658431338	1.48439095934352	0.00517122031323212
C11orf89	1.03070744566579	0.829948464080399	1.28002868193509	0.784363639441423
C12orf39	0.922166359589036	0.861327923310914	0.98730201557709	0.0199679020645835
C12orf5	1.18203568496057	1.04744492766508	1.33392059440758	0.00669747663093241
C12orf55	1.47336770901251	1.25514102939504	1.72953664578002	2.15367808431437e-06
C12orf76	0.957928523408035	0.855217893104428	1.07297457566951	0.457617004092642
C14orf119	1.22519770667198	1.06627966838936	1.40780084712836	0.00416550749711908
C14orf132	0.832223114199309	0.755013947597428	0.917327837467827	0.000218156891900802
C14orf142	1.23172862520366	1.0650008128419	1.42455797953587	0.0049755662279857
C15orf26	1.20896341705335	1.02774655067743	1.42213325144212	0.02200513522111
C15orf41	1.38452205921778	1.13819329036449	1.68416151165922	0.00113417165697015
C15orf48	1.00676803552048	0.923886352202295	1.09708502017555	0.877701005905034
C15orf59	0.8832459137666	0.821403937321969	0.949743857728317	0.00080168170890831
C15orf65	1.25909288796469	1.07387464804412	1.47625693875039	0.00454137305170585
C16orf54	0.94199311876835	0.739041163355635	1.20067877109562	0.62931535716101
C16orf86	0.893051829678244	0.786123781652808	1.01452416159558	0.0821485742754668
C16orf92	0.827295509605324	0.726198752323886	0.942466312456402	0.0043580053621381
C16orf96	0.813399536627918	0.541195624225955	1.22251322178148	0.320461908804705
C17orf102	0.585294556086457	0.405895280316863	0.843985466194668	0.00412755603337533
C17orf53	1.26780312971541	1.08936741918873	1.4754661718387	0.00216969396172997
C17orf58	1.18671268913771	1.05065705101587	1.34038695614215	0.00586325319485213
C17orf72	1.04639453662331	0.94517755382111	1.15845062321734	0.382275120302356
C17orf96	0.879384802942323	0.785178376623359	0.984894203240214	0.0261993399718736
C18orf32	0.978416554791484	0.893177882797636	1.07178981155642	0.638938360747763
C18orf54	1.43642240474721	1.20001129830789	1.71940824871331	7.90554514345913e-05
C19orf12	1.07242770861999	0.883299132318143	1.30205176042412	0.479948150625205
C19orf40	1.6788635240309	1.36555988151446	2.06404916435853	8.81594541422557e-07
C19orf52	1.33032034844307	1.07235407843346	1.65034317029598	0.00945586563242986
C19orf55	1.34465045646566	1.18690938421871	1.52335542553949	3.29633836065061e-06
C19orf69	0.944079060831599	0.63950792728987	1.39370480812927	0.772152737152046
C1GALT1C1	1.2348565510924	1.07245737055864	1.4218473793336	0.00336437601923396
C1QA	1.02609516847661	0.961990442331923	1.09447167917679	0.433833482553721
C1QB	1.05140003265976	0.984622525348212	1.12270641816367	0.13436920308183
C1QC	1.05275850038917	0.982592532602818	1.12793495102781	0.144025798671735
C1QTNF4	0.88119825718861	0.828940460138412	0.936750473420717	5.01967433851299e-05
C1QTNF6	1.20549492413932	1.08251533775936	1.34244565544319	0.000663662167935082
C1QTNF9B-AS1	1.25334382135495	1.0570875321547	1.48603657383667	0.00935180370672517
C1R	1.05248645321714	0.99168039029773	1.11702091222457	0.0920251651865066
C1RL	1.12619877469767	1.03065000675255	1.23060560987804	0.00860489894586947
C1RL-AS1	1.12505926446883	0.955470852093501	1.32474825976511	0.157496883332713
C1S	1.06493631492767	0.996475930839618	1.13810009830962	0.0634778674890952
C1orf109	1.2606782296357	1.12167772339396	1.4169039515811	0.000101744227787788
C1orf112	1.32495955170533	1.12956723313032	1.55415079524766	0.000546946191575531
C1orf123	1.26929695763636	1.10485443203735	1.45821451219962	0.000755758958372439
C1orf131	1.44430571283556	1.25760540872995	1.65872298071308	1.93493971179718e-07
C1orf162	1.05462546859614	0.974622189119681	1.14119593359172	0.186387542448407
C1orf174	1.73473325845882	1.3964439682971	2.154973308147	6.45477876257508e-07
C1orf226	1.15588947694936	1.06070286976063	1.25961805234276	0.000953163507466792
C1orf53	1.05071369157113	0.940536047741555	1.17379792545537	0.381423437788742
C1orf54	1.10123455383508	0.996366409784522	1.21714013103132	0.0589362467818511
C1orf63	1.21926642648305	1.07981226796841	1.3767306251722	0.00137888939948995
C1orf74	1.01749469784273	0.797360025974763	1.29840401626911	0.889108687689315
C1orf85	1.1561339562326	1.04208355154747	1.28266656043958	0.00618368242317868
C1orf86	1.01592607471534	0.937122146546523	1.1013567367819	0.701312964719601
C1orf87	1.10034685184238	0.950880771256405	1.27330705484732	0.199217100278891
C2	1.0605173859762	0.983942645393854	1.14305150937695	0.124386141005882
C20orf195	1.26211884387863	1.04944519274896	1.51789153648025	0.0134145987061475
C20orf201	0.854451818291617	0.780602669024386	0.935287488440605	0.000648316246759928
C20orf203	0.951800612639949	0.716388488208774	1.26457141778885	0.733282954968583
C20orf24	1.17196124650976	1.02744632097058	1.33680284340619	0.0181171206461271
C20orf26	1.31351421809016	1.15991030693761	1.48745949648486	1.72471035222523e-05
C21orf59	1.16304002800082	1.03005384788491	1.31319552808784	0.0147719541403617
C21orf62	1.09457813723044	1.02477361159004	1.16913753921112	0.00719203402870524
C21orf88	1.21289544687324	1.06117759907545	1.38630457929714	0.00464205576932252
C22orf34	0.984319363080324	0.811744806488931	1.19358276245167	0.872330687196173
C22orf39	1.03084354705678	0.901795627653597	1.17835836183139	0.656199485888382
C2orf27A	1.0184161405038	0.916598384898739	1.13154403534459	0.734193239166669
C2orf44	1.78683082813325	1.46250455249562	2.18307997942245	1.3476008730403e-08
C2orf48	1.83337589377269	1.50477260393735	2.23373761528606	1.79978161894313e-09
C2orf66	1.56390065543846	1.33674821566806	1.82965290801494	2.34255569396454e-08
C2orf82	0.935667680090014	0.884822436230886	0.989434683973794	0.0196716198628867
C3orf17	1.41954586443468	1.22599718432981	1.64365015433143	2.80809142411393e-06
C3orf18	0.871739202741396	0.736442564324787	1.03189206383386	0.110681441133671
C3orf38	1.35084435126346	1.13542366531031	1.60713618809565	0.000691691716498553
C3orf52	1.06062658820264	0.856928717402301	1.312744848851	0.588542097905236
C4A-AS1	1.26466218090743	1.13884229270806	1.40438271572651	1.12513359912133e-05
C4B	1.09277331431224	1.03365055783968	1.15527777488818	0.00177080368379736
C4B-AS1	1.27456463968255	1.14843973868231	1.41454093411382	5.03586272048187e-06
C4orf33	1.19245972955044	1.03260032330964	1.37706736527247	0.0165393367132818
C4orf46	1.41159996745287	1.20552092462357	1.65290740908139	1.85774835020487e-05
C4orf47	1.20157683622778	1.09477600118072	1.31879662305532	0.00011038660095756
C4orf6	1.30883131323257	1.10720924001682	1.54716863315922	0.00161527054163589
C5AR1	1.03010792596115	0.953911526707476	1.11239072955808	0.44931759379766
C5orf15	1.23387606920529	1.08415014709648	1.40427980223481	0.00145209456393282
C5orf34	1.43312696972095	1.20809499714249	1.70007566971103	3.64167002438742e-05
C5orf63	1.14229315142702	1.00584818398144	1.29724710406313	0.0403831022080239
C6ORF165	1.38176230265293	1.17689595637748	1.62229044180721	7.83952841139704e-05
C6orf118	1.24854988978261	1.14330737844721	1.36348007251852	7.77859824823113e-07
C6orf141	1.06281794657435	0.988960017359249	1.1421917648165	0.0973434776789378
C6orf25	1.75490793164497	1.30934734969835	2.35208926742009	0.000167475210397171
C6orf3	1.08851722110735	0.967347058859227	1.2248651916558	0.158948226887792
C7orf31	1.37344755726801	1.17614419316261	1.60384942894894	6.06151688599495e-05
C7orf43	1.17846372805688	1.0147564843429	1.36858130967749	0.0314029488289867
C7orf49	1.36927803025435	1.14675815975937	1.63497622247628	0.000513955528369675
C7orf57	1.16504616580265	1.06437706170841	1.27523658417895	0.000922777561456458
C7orf73	1.45784349469877	1.29160839597767	1.64547370677843	1.0444999334392e-09
C8orf4	1.11734321144497	1.04832132783708	1.19090952269188	0.00064845314628442
C8orf46	1.03032694212755	0.940113973778256	1.12919671155138	0.522791433617794
C8orf58	1.42271613178596	1.18193824078367	1.71254395686692	0.000193817436090511
C8orf76	1.40193404044717	1.1682599602082	1.68234735479101	0.000281651390059668
C9orf117	1.10205517805393	1.02519272660277	1.18468028884687	0.00842655696212437
C9orf170	2.36268008941104	1.64504388803842	3.39337889128036	3.24315911979807e-06
C9orf3	1.14595376683961	1.02197132217019	1.28497738365617	0.0197019830806889
C9orf40	1.32976181633632	1.11901963534611	1.58019254741598	0.00120658009086599
C9orf47	1.48560411072601	1.17410134101493	1.87975219575015	0.000977960949689746
C9orf64	1.27004195777112	1.09712199089813	1.47021624566897	0.0013684660583366
C9orf89	1.06797146593413	0.962314247788766	1.18522931014513	0.215999926475824
CA10	0.906255882927412	0.853865700962994	0.961860541317304	0.00119589669372837
CA11	0.856646879342271	0.805002278616841	0.911604718868306	1.0763216595977e-06
CA13	1.44370359446101	1.21447472288889	1.71619880544053	3.14581535763373e-05
CA2	1.12800171016014	1.04364060107234	1.21918202187306	0.00238950361411685
CA3	1.0844638746237	1.02165864165596	1.15112998355069	0.00772353363891818
CA4	0.868221530948342	0.806831333438257	0.934282786948764	0.000158873147793612
CA9	1.02028795570896	0.964331611014607	1.07949122550231	0.485232381696132
CAB39L	0.862941707620362	0.758003513301974	0.982407571578213	0.0258629748297464
CABP1	0.87357748034182	0.827438785071888	0.922288908772945	1.05014376149864e-06
CABP4	1.24236994926124	1.06975058966605	1.44284387944036	0.00446408658623029
CACNA1A	1.00827768758057	0.934185714742538	1.08824602991601	0.832346452897874
CACNA1B	0.853651870608015	0.773597911149734	0.941990025683401	0.00163586799091798
CACNA1E	0.912037348157133	0.810021808671267	1.0269009001103	0.128171607086268
CACNA1I	0.763675018143744	0.669303689570553	0.871352634722585	6.17110204140364e-05
CACNA2D2	0.873072143315633	0.764566365250509	0.996976851295312	0.0449972652977102
CACNA2D3	0.739362548905317	0.663255609701762	0.824202570965929	5.08361862841215e-08
CACNA2D4	1.08364975685947	0.980839181614592	1.19723683306426	0.114207020428093
CACNB4	0.916649834895083	0.816326036633435	1.0293030996272	0.14113013372915
CACNG2	0.744582460190862	0.66275531244002	0.836512404529463	6.85754218412884e-07
CACNG3	0.846334025953011	0.78436684531107	0.913196787660962	1.70369352312868e-05
CADM2	0.93872404917483	0.868187559633299	1.01499132384641	0.11260186498289
CALD1	1.18377159321437	1.08587778329824	1.29049070388468	0.000127763280976007
CALHM1	0.492716391574152	0.353554612414476	0.686653303341018	2.91584834250933e-05
CALHM2	1.00732866685401	0.874096184678784	1.16086886186188	0.919645598022757
CALML3-AS1	0.442574689894589	0.18309125676334	1.06980726222483	0.0702770849585592
CALN1	0.825657049085295	0.748163109597514	0.911177728438086	0.00013911604340743
CALU	1.17986442492719	1.08121750486059	1.28751158296153	0.00020492467657953
CALY	0.923189824511366	0.886012463469295	0.961927159290873	0.000138483160664222
CAMK2D	1.07009359334003	0.964252318559828	1.1875525487122	0.202340696040599
CAMK2G	0.910869596354545	0.827312432849627	1.0028658927623	0.0572144754402449
CAMK2N2	0.857479823190679	0.793158444005462	0.927017360448166	0.000111162663174109
CAMK4	0.773545308446172	0.688173448735851	0.86950803655426	1.68144545647762e-05
CAMKMT	1.27294443583475	1.07146913971933	1.512304439442	0.00604739578599344
CAMLG	0.913095017264569	0.8125257822533	1.02611206778109	0.126757530698494
CAMSAP3	0.891757957354293	0.822925054753806	0.966348332586144	0.0051873254412495
CANT1	1.10615578561831	0.973427542779824	1.25698171490265	0.121862081910823
CAP1	1.33477867893386	1.16635531988284	1.52752260941837	2.71614466927958e-05
CAPG	1.08171297896341	1.00752582057961	1.16136276109009	0.0302503474138948
CAPN15	1.16291733182872	1.02319239890204	1.32172279829172	0.020831535864099
CAPN5	1.24215142733264	1.13750690773539	1.35642268010159	1.3700573259895e-06
CAPZA1	1.40241293562077	1.2227394045153	1.60848831299103	1.33304025575707e-06
CAPZB	1.37728255040269	1.20410475696312	1.57536726989431	3.0259239651537e-06
CARD16	1.05833874394018	0.977818236990996	1.14548988201699	0.160207429766727
CARD6	1.12845679091562	0.951954842418684	1.33768396589921	0.163744113572662
CARD8	1.38897189579415	1.19412544386527	1.61561160698596	2.03971735747373e-05
CARHSP1	1.19236274072239	1.04374270703806	1.36214499596131	0.00958939648441698
CARM1	1.22657603375896	1.04490671993423	1.43983069291254	0.012522640346509
CASC10	0.876631350858889	0.732451124803325	1.0491929076019	0.150952916670655
CASC5	1.34383858766858	1.19096350965413	1.51633709603038	1.61681037492224e-06
CASKIN1	0.884924478637778	0.822469203115087	0.95212237725911	0.00106122710353251
CASP1	1.06978385350033	0.971552374196346	1.17794729713535	0.169850201444985
CASP2	1.362945415325	1.19346154240886	1.55649774973566	4.86881957480664e-06
CASP3	1.2574671727492	1.12781653671121	1.4020220834435	3.68362980375175e-05
CASP4	1.12682465432703	1.03022438230742	1.23248277113708	0.0090246380137177
CASP5	1.06900058266022	0.866878870968919	1.31824904724073	0.532630908338201
CASP6	1.44083285320628	1.25018255817173	1.66055693011306	4.57295728250986e-07
CASP7	1.22128746175583	1.07419607472418	1.38852030773337	0.00226525002494088
CASP8	1.22025170125351	1.06655950614819	1.3960910814902	0.00375384269210289
CASQ1	0.933776035048043	0.848091614407341	1.02811732696988	0.162927461939853
CAST	1.17662564205697	1.03731805818996	1.33464166618455	0.0114117045386287
CASZ1	1.03337827294524	0.893421601498615	1.19525949809592	0.658350744512955
CATSPER2	0.928434376770478	0.81308375403191	1.0601495697027	0.272627826416812
CATSPERB	1.48919889882795	1.03040594668668	2.15227150755634	0.0340593058719613
CAV1	1.06063140884771	0.990791610854805	1.13539413647613	0.0903084366926842
CAV2	1.07033994590905	0.979881874135304	1.16914868010957	0.131336181848315
CBFA2T3	0.778411050063247	0.676046492972465	0.896275284553907	0.000497224299417327
CBFB	1.24424846594576	1.1016085132486	1.40535791652783	0.000435330685278884
CBLN1	0.876171518506847	0.792512367014436	0.96866189323278	0.00982837199080444
CBLN2	0.855019960056384	0.78950957750521	0.925966135084658	0.000117540778024513
CBR1	1.01906066684164	0.941285758824887	1.10326182348726	0.641116336321385
CBS	1.01794631947481	0.921700282145145	1.12424258666891	0.72558765483052
CBWD2	1.21003537227494	1.0523766738941	1.39131324218602	0.00743463052435525
CBWD6	1.1416942752294	1.00751297127881	1.29374594198736	0.0377740483146016
CBX3	1.32278993978293	1.18056209174217	1.48215264324536	1.43560014344018e-06
CBX6	0.792266891141245	0.688923116778173	0.911113027726609	0.00109335178239529
CBX7	0.791828600728082	0.710029465607424	0.883051427160991	2.72216703472397e-05
CBX8	1.48762812415797	1.30692637090026	1.69331454706307	1.84290560580428e-09
CC2D1B	1.6627255452667	1.3579211457385	2.03594755671832	8.60130778776062e-07
CCBL1	0.921926600764258	0.789158355662604	1.07703181636225	0.305549087301193
CCBL2	1.14763177227136	0.99047544709782	1.32972370853393	0.0668623491838371
CCDC102A	1.06330445751833	0.937302009327292	1.20624554106078	0.340178746272631
CCDC109B	1.21806215920166	1.11367107267634	1.33223845000614	1.59574150824483e-05
CCDC122	1.16062532148124	0.96097545787087	1.40175394265318	0.12194737543555
CCDC125	1.44758700003813	1.20121462348089	1.74449101910447	0.000101918493410518
CCDC135	1.16671892913142	1.05390843855316	1.29160466867721	0.00295912200597074
CCDC137	1.24368925516832	1.08192287775201	1.42964253296405	0.0021585337219598
CCDC138	1.59953579536909	1.33820101362739	1.91190615954758	2.45893696877528e-07
CCDC146	1.28162933990689	1.15575712917233	1.42121015172666	2.54546383107259e-06
CCDC15	1.521862379066	1.27984152595254	1.80964990887654	2.01313505179418e-06
CCDC150	1.23666824829085	1.10079170814015	1.38931674813819	0.000347492967952903
CCDC18	1.47504784912629	1.28138875337861	1.69797506921712	6.20728325969918e-08
CCDC181	1.32981808579278	1.15487365120982	1.53126373560347	7.47063438271003e-05
CCDC19	1.1285394880641	1.02379600959311	1.24399916017073	0.0149674957288588
CCDC23	1.2119528938371	1.08105552673267	1.35869969724815	0.00097909984718128
CCDC30	1.38524240636781	1.16610606486835	1.64555916670953	0.000208104044664083
CCDC34	1.27246347771247	1.13504691878642	1.42651662703362	3.5887504876998e-05
CCDC40	1.25134463109588	1.13362482108014	1.38128890321977	8.66516053079687e-06
CCDC64	0.846963028005267	0.780216932192598	0.919419127180353	7.30990342142708e-05
CCDC65	1.18675990802993	1.05089542711568	1.34018955927208	0.00577636603506207
CCDC77	1.45906881417108	1.25391224222025	1.69779170567557	1.02575245678458e-06
CCDC8	1.05784227994013	0.951297952184475	1.17631945560199	0.299191289754732
CCDC81	1.1455044736429	0.975253489720194	1.34547634329651	0.0979785601173794
CCDC85A	0.883547368738634	0.7944856879423	0.982592845475724	0.02237760179559
CCDC86	1.273000539431	1.09906372007418	1.47446444077169	0.00128149588563946
CCDC89	1.29683367868514	1.0883907932259	1.54519645024503	0.00364482567543541
CCDC9	1.04346578337687	0.889178721166055	1.22452417625385	0.602238627276821
CCDC97	1.30046969598615	1.09825312948176	1.53991951835035	0.00231249864769181
CCK	0.924172500886269	0.889082309917386	0.960647627185094	6.53049498747852e-05
CCKBR	0.824009453604552	0.755471559400457	0.898765242954375	1.24861038902651e-05
CCL2	1.04206389790575	0.995153446771379	1.09118565668595	0.0795612885640182
CCL20	0.966995646993044	0.892277236436661	1.04797090312174	0.41337339792823
CCL5	1.00214915501209	0.933932576599998	1.07534842884229	0.952405609020157
CCNA2	1.32101702449905	1.19445405103059	1.46099046464839	6.02816262009755e-08
CCNB1	1.21180007987696	1.11139180548859	1.32127970202573	1.34180386459654e-05
CCNB2	1.21168955939451	1.1245936033021	1.30553080155772	4.52974009279209e-07
CCND2	1.12238128311716	1.03237753528323	1.22023165134655	0.00678703369806506
CCNF	1.20827433419164	1.03441009249481	1.41136177736353	0.0169974899943399
CCNJL	1.25817656439185	1.07394633556534	1.4740105857818	0.00446746387045816
CCNL2	1.27962593302113	1.14834809223078	1.425911306457	8.0215568662187e-06
CCNYL1	1.44522680977659	1.20832330053462	1.72857755103529	5.53972293843626e-05
CCR1	1.05631718118244	0.968106507775472	1.15256532034385	0.218158926203969
CCR2	0.918867350868252	0.750874116217326	1.12444574963517	0.411430637385033
CCR5	1.00019227261877	0.887558465509422	1.12711964459955	0.997483523624501
CCRL2	1.04406313331941	0.919766431703897	1.18515721903154	0.504935097723244
CCT5	1.20395525039104	1.0565317633452	1.37194951939229	0.00535088499316984
CCT6A	1.11611194054715	1.03417938149297	1.20453558263131	0.00474394116208385
CCT7P2	0.764238829619054	0.528815478901292	1.10447029635175	0.152404824962283
CCT8	1.13290943602257	1.00770831200336	1.27366597550176	0.0367549156514513
CD101	1.14856140789382	1.02575353405834	1.28607239838962	0.0163647914082182
CD109	1.14234152701743	1.00546486552901	1.29785157998726	0.0409874225764313
CD14	1.02213639760358	0.963178102484351	1.08470366239769	0.470109027292291
CD151	1.16703897211451	1.05318587352524	1.29319999125628	0.0031839965848745
CD163	1.03688156584247	0.987965330206367	1.08821974690079	0.141858485432977
CD164	1.25970441747832	1.11906568795063	1.41801793808944	0.000132142195705347
CD180	1.1214841125841	0.993762245822943	1.26562124901113	0.0630933886259199
CD2	0.983390138548565	0.88334345638916	1.09476801758129	0.759627179965209
CD226	1.05823531997436	0.883446608079164	1.26760574119596	0.538865302569189
CD247	0.976762034079661	0.839047779474907	1.13707954964914	0.761716531318009
CD248	1.08822190087299	1.01737115019154	1.16400676912912	0.0138417325330495
CD276	1.25042469751491	1.12190828393195	1.39366287471864	5.37202507500442e-05
CD2AP	1.24313897419777	1.05633433660365	1.46297858132517	0.00880272908529862
CD300A	1.02130146594917	0.929738271457021	1.12188205688825	0.660072153265514
CD300LG	0.756573698941179	0.590615013083571	0.96916561423159	0.0272546672837786
CD302	1.02212723809567	0.907742092052742	1.15092612759042	0.717772494607033
CD36	1.06917863335885	0.988474330925086	1.15647206433905	0.0948280133465403
CD3E	0.993548229290209	0.903921056760298	1.09206227307467	0.893253949351711
CD3G	0.825965921724734	0.629065316322997	1.084497406149	0.168777957833701
CD4	1.03894940163815	0.94357529732878	1.14396366905753	0.436707947964054
CD40	0.984265174549681	0.864613781221228	1.12047477714611	0.810462378457221
CD44	1.1166001795883	1.05363665946626	1.18332629171066	0.00019585816022007
CD48	1.06417832566407	0.980525043705608	1.15496846927368	0.13645179329247
CD5	0.928346884529188	0.757170451066853	1.13822183208647	0.474627951552489
CD53	1.07782640658632	0.991712849358606	1.17141747582086	0.0777171051988875
CD58	1.35277401235942	1.19968404921192	1.52539956642514	8.17787486417547e-07
CD68	1.07058524885298	1.00286406491359	1.14287949400236	0.0407814081182156
CD69	1.05319497217107	0.949564570116835	1.16813504243313	0.326737261733373
CD70	1.09621020364386	1.00005208674763	1.20161422239617	0.0498701645065242
CD74	1.01501893904513	0.947308690859978	1.08756887439195	0.672138495366308
CD80	1.0150325402361	0.792691954416825	1.29973699366752	0.905844899554482
CD86	1.04157495037348	0.941360353717428	1.15245811336896	0.43000056690437
CD8B	0.916224221871629	0.780227291138421	1.07592599525635	0.285847409746011
CD8BP	0.556573002675947	0.42453184287335	0.729682619826787	2.22732562296487e-05
CD93	1.06077181378113	0.98222212658991	1.1456032301157	0.132842770118107
CD96	0.963364163229952	0.802964479199498	1.15580518819583	0.687923984790752
CD97	1.0918634482478	0.986172655699015	1.20888140908201	0.0906626230352654
CD99P1	1.22960404890084	1.03317408972073	1.46337982351263	0.0199408768080258
CDC20	1.19896528511173	1.11685468679921	1.28711261356913	5.35165294236884e-07
CDC25A	1.3004802955027	1.15567704066641	1.46342701245977	1.28748267023486e-05
CDC25B	1.14315868164313	1.02124459892	1.279626617167	0.0200547718618713
CDC25C	1.29640792962095	1.15064332458916	1.4606381352659	1.99236951032227e-05
CDC42	1.38256976355815	1.18109300981068	1.61841542979892	5.5508105599021e-05
CDC42BPG	1.09198924429686	0.878443565355671	1.35744691712463	0.427996428579454
CDC42EP3	1.13814410460081	1.00868408568605	1.28421972867405	0.0357016502342249
CDC45	1.21696991851671	1.11794847847365	1.32476210763901	5.76468472978265e-06
CDC6	1.32351796973432	1.176691463557	1.48866535575476	2.98281978230559e-06
CDC7	1.18652686933692	1.06036311651299	1.32770179359706	0.00286538795287847
CDCA2	1.31041703405537	1.1519617208432	1.49066828530164	3.93349412393901e-05
CDCA3	1.23921523263427	1.1343907021571	1.35372618082349	1.97223281887157e-06
CDCA4	1.27560730134873	1.1234076434581	1.44842702177582	0.000173316082718799
CDCA5	1.1868789604301	1.08108891369739	1.30302110109876	0.00032210693706495
CDCA7	1.24714438164789	1.14447268828963	1.35902684667848	4.69171236911448e-07
CDCA7L	1.19910283829442	1.09948804939766	1.30774283321537	4.07242233619051e-05
CDCA8	1.28280445907449	1.1658995324271	1.41143146081868	3.25088212786883e-07
CDCP1	1.05792750856549	0.917751798394249	1.21951339712744	0.43746490465188
CDH10	0.9430248837067	0.866125036820779	1.02675236655704	0.176484775934102
CDH11	1.13193460039586	1.04717608293658	1.223553479163	0.00180364457144331
CDH18	0.818873184144517	0.747332458895885	0.897262367944865	1.83450060826182e-05
CDH2	1.09075323048269	0.990756994125522	1.20084199946379	0.0766134067933728
CDH20	0.93395809161713	0.853609306395102	1.0218699706788	0.136591011567175
CDH22	0.802248423940051	0.738096846779388	0.871975725844911	2.19976137190884e-07
CDH5	1.0034283156173	0.902220987887493	1.11598865255852	0.949692849973906
CDH6	1.10708819186154	0.984575839571305	1.24484495282041	0.0890962821577439
CDHR1	0.85606315771514	0.773803411998878	0.94706758671966	0.00256929801677821
CDIP1	0.814590193574455	0.729277338686495	0.909883179234397	0.000280072251361777
CDK1	1.21597095985996	1.12858642877898	1.31012152682222	2.76089294074755e-07
CDK11A	1.35750629832822	1.19939481193951	1.53646099821025	1.31359302763761e-06
CDK11B	1.33612601603292	1.12800253800141	1.58264956910742	0.000796047711136974
CDK13	1.57733633912616	1.3244977385884	1.87844029796495	3.17405152419216e-07
CDK2	1.26983893451473	1.16207882458034	1.38759168956703	1.29281228690721e-07
CDK20	1.54728336493709	1.29295819704904	1.85163435049573	1.89457597838199e-06
CDK4	1.15788116894043	1.09007313488227	1.22990720391587	1.9259402172357e-06
CDK5R2	0.867589312881936	0.811226305740433	0.927868352518383	3.40662622227452e-05
CDK6	1.31365536434442	1.20564938720901	1.43133686673678	4.59534962018907e-10
CDK7	1.15180144944911	1.00611010463111	1.31858985696151	0.0405357065145616
CDKN2C	1.19804199027226	1.10790263460371	1.29551511624388	5.96757674140629e-06
CDKN3	1.10326872053404	1.0104869080401	1.20456965847252	0.0283271686957949
CDR1	0.962998154158699	0.900044059157726	1.0303556092364	0.274375895853568
CDR2	1.22373167593483	1.05278713630467	1.42243304752243	0.00853741632338446
CEBPB	0.998276033317293	0.917345234232198	1.08634677709947	0.96809321218944
CEBPD	1.02993057722624	0.957794025461489	1.10750011558536	0.426020880732161
CEBPG	1.42936113259612	1.24678716108943	1.63867042518408	3.0005634238589e-07
CECR1	1.03276727314621	0.931381173095309	1.14518982269864	0.54082051768179
CECR6	0.88559271871062	0.764406070431294	1.0259919351383	0.105618253300304
CEL	1.34611206679419	1.14332526790447	1.58486630815923	0.000360053323100628
CELF3	0.958455783975577	0.897209689360273	1.02388271184548	0.207875557713698
CELF4	0.903252757106292	0.853073062276205	0.956384135543083	0.000484502024693165
CELF5	0.918594857789747	0.859042454003146	0.982275682448023	0.0130318594015706
CELSR1	1.23390526254384	1.12460712407552	1.35382585112553	8.93228896578782e-06
CELSR3	0.94924091673714	0.853427608280723	1.05581107204066	0.337273397787
CEND1	0.84804450408668	0.796670238673419	0.902731702528726	2.34888304322353e-07
CENPA	1.26433175820467	1.15291076637466	1.38652083181729	6.26194119912427e-07
CENPE	1.24801493047902	1.09271173291085	1.42539081423556	0.00108460433226909
CENPF	1.23984470333868	1.15474197809786	1.33121936982765	3.11149906375549e-09
CENPH	1.26103423628136	1.13677002705643	1.39888219008677	1.17675480510171e-05
CENPI	1.30695377324368	1.12480040102104	1.51860558001699	0.000472834191313756
CENPK	1.23806193570505	1.13128876768279	1.3549125567483	3.47204712887476e-06
CENPL	1.40188056750398	1.20324801150268	1.63330344763333	1.4680579117078e-05
CENPM	1.14523723602433	1.05603229472251	1.24197747865398	0.00104676685881691
CENPN	1.224385165201	1.10444285289718	1.35735319290789	0.000118839251782845
CENPO	1.2837884219456	1.10604391401064	1.49009699474349	0.00101789586727741
CENPW	1.2265609524202	1.1060400373823	1.3602145665202	0.000108897576185816
CEP104	1.21475965050065	1.03748977809932	1.42231859979173	0.01563786747693
CEP112	1.34508158982824	1.15282477035468	1.56940111786306	0.000165132729120295
CEP135	1.39529514905781	1.24891980756328	1.55882590795215	3.8398785192944e-09
CEP164	1.36167521498042	1.16747078979906	1.58818482423111	8.41711349719804e-05
CEP55	1.29168094033517	1.16099734204811	1.43707448001722	2.56409922634355e-06
CEP85	1.19194391796004	1.02924851426131	1.38035691465785	0.019028084074883
CEP89	1.51849878084862	1.27558755655908	1.80766779636732	2.64295955448957e-06
CEPT1	1.3582999782261	1.19488475054534	1.54406425390146	2.83558312154794e-06
CERKL	1.16826533405138	1.02519823593196	1.33129754120722	0.019630292113235
CERS2	1.2933201051783	1.14604302666077	1.45952364400497	3.04765102258174e-05
CFH	1.04141777181873	0.955241925781022	1.1353678541414	0.357104110439887
CFI	1.14850721288147	1.07900197524132	1.22248971578179	1.37866043784762e-05
CFL1P1	0.931638751368626	0.805126192370866	1.07803071279525	0.341637121484315
CFLAR	1.17494624676379	0.996206882934609	1.38575501377551	0.0555144771695456
CGREF1	0.868376382185336	0.794695496740183	0.948888655127022	0.00181050714863584
CHADL	0.92169650469506	0.855850184570235	0.992608825800136	0.0310732178747263
CHAF1A	1.0920658046751	0.980201789068043	1.21669612832943	0.110200280577268
CHAF1B	1.16103216705304	0.993187703124498	1.35724162581874	0.0609080914268852
CHCHD3	1.28813902835061	1.12635191719595	1.4731649416382	0.000217721813395249
CHD1	1.28927933163354	1.13957350477724	1.45865202025941	5.46834222401165e-05
CHD3	0.725525898636137	0.632155352799799	0.832687451368429	4.99676773876862e-06
CHD5	0.889821403084098	0.833835386843714	0.949566475445058	0.000430320346270496
CHEK1	1.19808364519243	1.07066480934589	1.3406664796936	0.00163200762391376
CHEK2	1.33189798658743	1.17705154526683	1.50711517588935	5.49180354732292e-06
CHFR	1.71002031709217	1.41896393555125	2.06077787574777	1.74176197290083e-08
CHGA	0.890859578160605	0.849752112423778	0.933955651768596	1.62950494115056e-06
CHGB	0.841751206213031	0.792450378435221	0.894119193381157	2.21454547208045e-08
CHI3L1	1.0672474142817	1.02941321174751	1.10647214383174	0.000409140296546411
CHI3L2	1.06589698666504	1.02633178934894	1.10698742645625	0.000943978206228138
CHIC2	1.30945361650302	1.20038106953067	1.42843703328581	1.23300134212738e-09
CHP2	0.5796629966956	0.335003199879442	1.00300292611844	0.051266067822325
CHPF	1.13278689522822	1.02511690635345	1.25176566891812	0.0144139610629113
CHPF2	1.25996310984191	1.0928188772592	1.45267168347602	0.00146102959568749
CHRAC1	1.30718457993243	1.13739949821743	1.50231429562884	0.000160902295085837
CHRM1	0.856518065468916	0.797439673203986	0.919973285912691	2.16257694882037e-05
CHRM4	0.786746638643889	0.687211413220857	0.900698477221786	0.000510121133836056
CHRNA1	1.11692135254404	1.03536726194083	1.20489931797757	0.00425755289325199
CHRNA2	0.757900537108476	0.635702062843198	0.903588737120396	0.00200088838820069
CHRNA4	0.920516802179966	0.839315317512246	1.00957431065026	0.0787934177374145
CHRNA7	0.728710336014552	0.623238474075884	0.852031406760978	7.26688225528932e-05
CHRNA9	1.1444385413127	1.06060548097754	1.23489798830265	0.000509128106451215
CHRNB2	0.809919900095798	0.730088180120673	0.898480844413568	6.83732887487297e-05
CHRNE	1.39054220352062	1.1738581695398	1.6472242302748	0.000136394360360648
CHST1	0.865453814409364	0.79767421957371	0.938992744777437	0.000515119119123069
CHST12	1.00442225435042	0.893512494936948	1.12909900057477	0.94107976161527
CHST14	1.17377876199347	1.04798675740259	1.31466983945643	0.00559927516249816
CHST2	1.04962875072592	0.94559177990716	1.16511219509398	0.363088950247149
CHSY1	1.19491330906126	1.05577794654113	1.35238458129331	0.00481278452626063
CIC	1.07192498026836	0.915735625554504	1.2547542448483	0.387359323689871
CIDEA	0.72497448385743	0.618525493564004	0.84974347494694	7.19999278754198e-05
CIITA	1.0608258515573	0.966431640591346	1.1644398217795	0.214290421377506
CIRBP	0.886054008395779	0.782441797370893	1.00338671634394	0.0565623695742873
CISH	1.19881641421502	1.04802022254313	1.37131017520249	0.00819835892814364
CITED1	1.05719068238455	0.988079400946299	1.13113595714101	0.106895679365553
CITED2	0.968451963132943	0.871471901688818	1.07622426274273	0.55154067436407
CKAP2	1.17515551350089	1.07024037742804	1.290355428591	0.000717812873384739
CKAP2L	1.28167341376247	1.14752860655756	1.43149959849227	1.08471216085003e-05
CKAP4	1.19556768312227	1.05040920669193	1.36078594496321	0.00683803358067347
CKLF	1.17391505593649	1.056127286894	1.30483945984125	0.00295658690639515
CKM	1.0629446912787	0.823087058054483	1.3726997717449	0.639903180116114
CKMT1A	0.85809523442267	0.802842415250051	0.917150635482509	6.58321917446496e-06
CKMT1B	0.850485480784325	0.797624315487517	0.906849927942379	7.55777400370133e-07
CKS2	1.27289434881323	1.1769618900337	1.37664612334583	1.58429753217278e-09
CLCF1	1.11569364000008	1.02794454245077	1.21093332074989	0.00880807035124715
CLDN1	1.0506524206356	0.902712830620595	1.22283684416955	0.523387104016249
CLDN15	1.37449731688401	1.20489878253826	1.56796811607812	2.20065001681075e-06
CLDN4	1.11672029096983	0.941852318728331	1.32405493246277	0.20390126968541
CLDN7	1.17621884902018	1.0303656340227	1.34271828864186	0.0162693345008795
CLDN9	0.825998032391765	0.698232208039536	0.977143050204917	0.0257704899933814
CLEC11A	0.982621085530754	0.894360815869068	1.07959134680045	0.715033784149687
CLEC12A	1.02191143010516	0.90730171363882	1.15099856561639	0.720997912078911
CLEC18A	1.1336641630896	1.03025813617204	1.2474489543454	0.0101459193123377
CLEC18B	1.20260827434526	1.10642694107719	1.30715061955707	1.4380951954401e-05
CLEC18C	1.17479854230075	1.01190024369186	1.3639206271525	0.0344044623711066
CLEC2B	1.04538232930647	0.951073652099077	1.14904267615267	0.35754113306954
CLEC2L	0.873217597612784	0.820352979982313	0.929488880258692	2.09224611259034e-05
CLEC4F	1.00040107046184	0.85617467771396	1.16892303385262	0.995972069924009
CLEC5A	1.10165312815776	1.00999262933508	1.20163215010666	0.0289400650358264
CLEC7A	1.00223220428517	0.905863259485003	1.10885321905798	0.965520106847526
CLEC9A	0.900002025878958	0.777061420090851	1.04239333679894	0.15974743341749
CLIC1	1.11547555869767	1.03137021714246	1.20643945439817	0.00629075220956568
CLIC2	1.18670228594868	1.01874318444684	1.38235262525018	0.0279166234019414
CLIC4	1.23772763215284	1.13168339799706	1.35370872640357	3.05825410626894e-06
CLIC6	1.13363197008262	0.966789117040559	1.32926759408224	0.122551013494255
CLP1	1.46828204901284	1.23223995181227	1.74953926163707	1.74382345461038e-05
CLPTM1L	1.10345790123263	0.932244285759827	1.30611617404585	0.252458421402328
CLSPN	1.24449405224122	1.10578218061474	1.40060626153585	0.00028601754989919
CLVS1	0.70633991605536	0.624587704249306	0.798792665335513	3.03149879678996e-08
CLVS2	0.852189566780863	0.756792495692937	0.959611864366078	0.00827651442163299
CMPK1	1.21374828895287	1.0485741268179	1.40494112076435	0.00944608163611987
CMTM3	1.28960249121677	1.15129428730249	1.4445260466367	1.11291394566453e-05
CMTM4	0.923565370044992	0.817775660524058	1.04304032746552	0.200176917243141
CMTM5	0.97458790310195	0.911681209236189	1.04183520648454	0.449586561681931
CMTM6	1.39735457011164	1.23091942162895	1.5862937575783	2.33012123744075e-07
CMTM7	1.07642397850984	0.975842683211988	1.18737231056252	0.14118695608741
CMTR2	1.405337785602	1.22158130579179	1.6167358507182	1.94237490674633e-06
CNIH4	1.41553269298323	1.23434105208216	1.62332185381369	6.60390861462208e-07
CNN3	1.30618224445033	1.19749924868966	1.42472912411776	1.67761038071529e-09
CNNM1	0.795902202430515	0.704819567171804	0.898755291904849	0.000231945468120402
CNNM2	0.820260714802456	0.68910232879105	0.976382769491773	0.0258255601650427
CNOT1	1.54382344630986	1.2961517095764	1.83882088475198	1.13034806339789e-06
CNOT11	1.48403423423943	1.271274440053	1.73240139108185	5.73263931156241e-07
CNOT3	1.06147281242273	0.943322944301195	1.19442078486417	0.321750174518927
CNPY1	1.18481973393278	1.07079932367854	1.31098121830528	0.00101989394105454
CNPY4	1.51966927863043	1.30330222007066	1.77195640492956	9.27732506783189e-08
CNRIP1	0.828358064879709	0.746406242700103	0.919307803708917	0.000395795706263148
CNTN4	0.833131906660475	0.735878267872353	0.943238581977148	0.00394325103850273
CNTN6	0.681248561524305	0.556431291416219	0.83406452825059	0.000201486061559747
CNTNAP2	0.878339458158627	0.810132445919736	0.952288983911188	0.00165922678265646
CNTNAP5	0.783920216261707	0.668563397575308	0.919181199109214	0.00272095929835721
CNTRL	1.81961030720194	1.55648290148287	2.12722007220328	5.83685990773412e-14
COL11A1	1.09088533335069	1.0154637422106	1.1719087162374	0.0173236052850727
COL11A2	0.980478144979206	0.884735067210512	1.08658221925448	0.706875334198578
COL12A1	1.04245909068907	0.95314634827449	1.14014071157866	0.362869326194084
COL14A1	0.96209576650375	0.88021626239367	1.05159186835207	0.394506053606014
COL15A1	0.957497585457046	0.863674223405291	1.06151324343259	0.409123481639555
COL1A1	1.03505555772988	0.991655093212949	1.08035547330916	0.114903377706122
COL1A2	1.05412688110865	1.0027073267096	1.1081832673171	0.0388354258078586
COL22A1	1.1273017210956	1.05601514433007	1.20340051675234	0.000324100760572171
COL26A1	0.902427419827557	0.82211187261209	0.990589328760225	0.030867307171454
COL27A1	1.2013635097161	1.08819974284713	1.32629537174972	0.000278526239429294
COL3A1	1.04638302599781	1.001094328318	1.09372054772898	0.0445994026191166
COL4A1	1.09997606527789	1.04583460175752	1.15692036020888	0.000215413347992171
COL4A2	1.10065987730905	1.04326280872711	1.16121475373599	0.000448243172467623
COL5A1	1.06565775660605	1.00273203718432	1.13253233376634	0.0405774262065498
COL5A2	1.12259754283324	1.04723285014932	1.20338589741101	0.00110790451355782
COL6A1	1.10220860791529	1.02450213014413	1.18580896966183	0.00908294817489072
COL6A2	1.06645413212888	1.01226775627133	1.12354108770992	0.0155951713685446
COL6A3	1.03617975532489	0.979223292437946	1.09644908739054	0.217911098842575
COL8A1	1.03315510735338	0.96260755081493	1.10887295133591	0.366057189629726
COL8A2	1.04517898311012	0.940075395611481	1.16203350479622	0.413827158052992
COLEC12	1.04515213787048	0.961914622327404	1.13559245897756	0.296969879005875
COLGALT1	1.2273801935132	1.0875987264174	1.38512679615842	0.00089642022190589
COLGALT2	0.932599920580464	0.852235135569726	1.02054301162467	0.129094164447357
COPB1	1.19629403315451	1.09198440977091	1.31056762436866	0.000117913719261601
COPB2	1.32796346907941	1.16421945605633	1.51473759181369	2.3938234795158e-05
COPG1	1.25332958272387	1.08541029470324	1.44722696163507	0.00209319074755963
COQ2	1.25122631036895	1.07115034326514	1.46157566918874	0.00470005359212412
CORO6	0.85224600203009	0.787806572447776	0.921956319454824	6.73068761906843e-05
COTL1	1.07469677832176	0.972116348423282	1.18810178144671	0.15929419922741
COX15	1.13147456312105	0.936406173645889	1.36717881942767	0.200755804448993
CP	1.08450125184356	1.02966029549631	1.14226310404961	0.00218429350694421
CPA4	1.09045133758894	0.964544197386363	1.23279381377399	0.166578656338357
CPB2-AS1	0.917651363664533	0.785258006502791	1.07236604818035	0.2796701485823
CPD	1.11065968014356	0.99647984024663	1.23792261044769	0.0579267903565191
CPE	0.88689434968668	0.821745916706276	0.957207783470269	0.00204591378771605
CPEB3	0.776473719714319	0.672769363667971	0.896163633432844	0.000542562289152539
CPLX1	0.88535157147785	0.840500641330937	0.932595844159111	4.41415884361755e-06
CPLX2	0.906841697435719	0.867618437464794	0.947838160990517	1.46000987843607e-05
CPLX3	0.883116037532603	0.800077037692709	0.974773551802426	0.0136218893408408
CPNE5	0.908430140197646	0.846956539069472	0.974365603843369	0.00722348266628841
CPNE9	0.793621372434809	0.715222378239501	0.880614060672472	1.32677289949293e-05
CPQ	0.979946680454388	0.878794263871161	1.09274210815099	0.715540114535358
CPSF4	1.39215990686822	1.18391384504395	1.63703567992262	6.27765730949027e-05
CPSF6	1.08913623953678	0.982817666378322	1.2069560701361	0.103259318531352
CPT2	1.61211662888315	1.31501173160824	1.97634740637876	4.33112982543274e-06
CPVL	1.01296003316993	0.939737033488762	1.09188846691536	0.736596849071774
CRB2	1.14955183575795	1.05985582246304	1.24683885778299	0.000772492689987338
CREB3L2	1.23152837542329	1.06095214499332	1.42952926447241	0.00618545286813155
CREB5	1.26997907993823	1.15581627070064	1.39541802998073	6.58978308990698e-07
CREM	1.07372477289451	0.960174578808336	1.20070340683066	0.212274543182756
CRH	0.710415691677454	0.608348486155001	0.829607480691528	1.55668822561159e-05
CRHR1	0.851212679820462	0.762025616525569	0.950838148448019	0.00433558045743298
CRIP3	1.0348775275406	0.949683794390154	1.12771377519007	0.434128676435646
CRISPLD1	1.19169639108098	1.10769974866146	1.28206248149061	2.56687741503699e-06
CRLF1	0.897500848535983	0.849936189486454	0.947727350696188	9.92510889269797e-05
CRLF3	1.5749757732096	1.30089179898122	1.90680630636598	3.2148138843828e-06
CRNDE	1.26904440787344	1.1934773188634	1.34939615835228	2.8150431723834e-14
CROCCP2	1.4949804740952	1.29152449472668	1.73048720876091	7.1469644913728e-08
CROT	1.31177041529409	1.16542406863481	1.47649398081895	6.91153589296067e-06
CRTAC1	0.829674007685838	0.770377529382817	0.893534575938312	7.9994412342477e-07
CRTAM	0.931889445268695	0.719534385234193	1.20691652271843	0.592912674830903
CRTAP	1.12220721652024	0.992731982273685	1.26856901892673	0.0652792658832732
CRY2	0.722295750378408	0.62172093045825	0.839140401192816	2.11507201022687e-05
CRYAB	1.02614215101289	0.965715520135932	1.09034978948784	0.404633518521066
CRYL1	0.906022094430474	0.797542331448286	1.02925701022731	0.129324508862301
CRYZ	1.32478083186024	1.18184513415056	1.48500357766903	1.3778623728413e-06
CRYZL1	0.895312708696399	0.759232304857843	1.05578337647707	0.188633525251952
CSDC2	0.872793788844191	0.804826649568782	0.946500713232031	0.00100466326385076
CSDE1	1.36607049064991	1.18056684142241	1.58072251392055	2.79933250124324e-05
CSF2RB	1.02314668021096	0.88529679437205	1.18246122191061	0.756624691360569
CSMD1	0.953413788768733	0.84345875180711	1.07770279301367	0.445433807575562
CSMD3	0.878941501502972	0.783234643110175	0.986343198503835	0.0282539888964044
CSNK1D	1.21276396992238	1.03452100990743	1.42171732875051	0.017387288669514
CSNK1G2	1.19327247257829	0.987236427302808	1.44230819936749	0.0676795221461448
CSPP1	1.36080736012078	1.21539584577524	1.52361609412751	9.13381343232589e-08
CSRP2	1.17636656351732	1.09106732504308	1.2683344647929	2.3440255584079e-05
CSTA	1.0707546973566	0.98884019797183	1.15945490915801	0.0922614207831152
CTA-268H5.14	0.764745786819437	0.621154885214363	0.94153025659011	0.0114785090849547
CTA-384D8.35	1.02399574415302	0.833637825283274	1.25782114515641	0.821223022121136
CTA-445C9.14	1.09057568253872	0.947897736721073	1.25472956973077	0.225511683955373
CTA-796E4.4	0.919551132824722	0.812262218002878	1.04101147035776	0.18517456856685
CTA-85E5.10	1.05041096414842	0.902870450351938	1.22206147423822	0.524214838736897
CTB-12O2.1	0.719290588411626	0.585272517324548	0.883996660124472	0.00173597276802243
CTB-13F3.1	1.23249679445479	1.05243257722559	1.44336880215722	0.00948242410142678
CTB-175P5.4	1.55897922055392	1.34301625263234	1.80966999122702	5.33391335957564e-09
CTB-1I21.1	0.808970356953412	0.685162527418525	0.955150073508876	0.0123702092266333
CTB-25B13.12	1.16754359757334	1.03269542273436	1.32000009124196	0.0133704083893647
CTBP2P8	1.74009275618471	1.23948403104288	2.44288972208773	0.00137257595733281
CTBS	1.28130338921892	1.11961769307459	1.46633836297773	0.000316176192634048
CTC-1337H24.1	1.09308581756364	0.959845116653306	1.24482229875255	0.179590846434699
CTC-203F4.2	0.834116403683243	0.7105666392224	0.979148381712448	0.0265826136198818
CTC-241F20.3	1.23139234622226	0.992359084333463	1.52800244817956	0.0587171307873683
CTC-273B12.8	1.06964217951887	0.997245068459615	1.14729511169521	0.0597258155921888
CTC-297N7.5	1.21766688329178	1.04216605316101	1.42272206446207	0.0131351473888248
CTC-301O7.4	1.68961880790003	1.41323394081761	2.0200560102299	8.6539666341145e-09
CTC-336P14.1	0.868601623361014	0.783556804348542	0.962876942575546	0.00737257032784726
CTC-349C3.1	1.41030230188939	1.19161173744848	1.6691280558996	6.35740718263554e-05
CTC-360G5.9	1.54100158413548	1.06947477167883	2.22042253374557	0.0203204975267403
CTC-458G6.2	0.812920941787021	0.631117898160057	1.04709509827323	0.108790635781083
CTC-462L7.1	1.66585183402084	1.38160419934438	2.00857983366544	8.97834745470261e-08
CTC-471F3.5	1.56723523132863	1.29379148491324	1.89847150716285	4.36986037207686e-06
CTC-471F3.6	1.3078007400957	1.13046576351901	1.51295406812743	0.00030691665049419
CTC-525D6.1	0.820591247742992	0.604996300350706	1.11301506386413	0.203565667459426
CTC-548K16.1	0.944425205272106	0.764915781689207	1.16606166287162	0.594998590784756
CTD-2006C1.2	1.28046223734883	1.13246502877385	1.44780059394117	7.97942404236262e-05
CTD-2006C1.6	1.54697670428156	1.17138979612051	2.04298938877184	0.00210644679861025
CTD-2008P7.1	0.336995133363117	0.117546103946497	0.96613767787758	0.0429629711296334
CTD-2035E11.4	1.31661025095444	1.16379352428088	1.48949321056709	1.24441968939082e-05
CTD-2050B12.2	0.424538157026297	0.237281322485903	0.759573677704838	0.00389619313018195
CTD-2081K17.2	0.964524743500926	0.881260555278842	1.05565598647629	0.43296027886486
CTD-2127H9.1	1.3105941695669	1.02233050426358	1.6801387321804	0.0328244427037935
CTD-2130F23.2	0.932637762650895	0.714194583527185	1.21789385747891	0.608515401461954
CTD-2162K18.5	1.31263164438848	1.14549080618878	1.50416033419133	9.05399936411237e-05
CTD-2170G1.2	0.789418998722796	0.578738948754639	1.07679352994212	0.135476146869617
CTD-2171N6.1	0.991878264708136	0.672008515221803	1.4640030144197	0.967253307129085
CTD-2201E18.3	1.19169271915259	0.98158364091923	1.44677588101546	0.0763722148227234
CTD-2201I18.1	1.60485105513637	1.14480950398268	2.24976024413865	0.00605749761323685
CTD-2210P24.4	0.86408477939799	0.79644599404428	0.937467840343939	0.000443691306936788
CTD-2227E11.1	1.25551005945475	1.05342282881878	1.4963654349124	0.0110471921315748
CTD-2231E14.8	1.16734608510395	1.03028791645831	1.32263696452142	0.015173355616124
CTD-2235C13.3	0.863804053256932	0.704445632392713	1.05921224877031	0.159397223268452
CTD-2260A17.2	0.77286248731537	0.624838050018184	0.955953985647829	0.017538372868975
CTD-2267D19.3	1.10911670564125	0.945368995210373	1.30122721706011	0.203846487044056
CTD-2267D19.6	1.80009837374406	1.21713349094617	2.66228329041954	0.00323907592773764
CTD-2296D1.2	0.733876614490549	0.554887743630682	0.970601516213288	0.0300711033880523
CTD-2306M10.1	1.21142460386093	0.941156191417989	1.55930501676723	0.136458845569058
CTD-2320G14.2	0.683890792555165	0.506464115038614	0.923474343500277	0.0131570121631732
CTD-2376I4.2	1.04170411897825	0.845509815707372	1.28342386018121	0.70115781601685
CTD-2377O17.1	0.799379354366571	0.685230726704426	0.932543342387434	0.0043945964290585
CTD-2380F24.1	0.805531152794822	0.716264921837039	0.905922401530902	0.000307728601472549
CTD-2396E7.9	0.933563277014086	0.883754161435001	0.986179675549262	0.0139933039970995
CTD-2521M24.4	1.21389406518874	0.795723110608673	1.85182355753533	0.368368725775448
CTD-2521M24.6	1.62821834178565	1.34008588188158	1.97830228970467	9.29546451532693e-07
CTD-2521M24.9	1.19190195448286	1.05943123261316	1.34093674546102	0.00349618093913554
CTD-2527I21.14	1.65053165314327	1.29038696063834	2.11119208510926	6.61035412434712e-05
CTD-2537I9.12	1.26357359302559	1.12762950184288	1.41590675162564	5.61914362221653e-05
CTD-2545M3.8	0.904972285949454	0.832839752915083	0.983352242097026	0.0184683135658751
CTD-2555A7.2	0.688223783419279	0.540229795267361	0.876760186523097	0.00248932094888773
CTD-2562J17.7	0.803168856803434	0.733912758897652	0.878960346060552	1.89664085232294e-06
CTD-2587H19.1	0.986934780860948	0.822322215390107	1.18449951058536	0.887663821350402
CTD-2587M2.1	2.91679388216457	1.69591854217292	5.01656555988361	0.000109194950746336
CTD-2616J11.2	1.57894417545874	1.20873053215189	2.06254797318365	0.000806436772073211
CTD-2619J13.14	1.0384893060122	0.876620458603764	1.23024739853712	0.662225973401998
CTD-2619J13.17	1.35642666289472	1.09554240717396	1.67943593946114	0.00515410545874042
CTD-2619J13.8	1.36370944303312	1.14909039550431	1.61841353151466	0.000384350544955829
CTD-2636A23.2	0.926306719842659	0.834941124508759	1.02767023211427	0.148511669539051
CTD-3049M7.1	1.2209457668834	1.13899529839274	1.30879255408171	1.78841389604425e-08
CTD-3092A11.2	1.07985384569985	0.929111497601722	1.25505316755063	0.316592043347332
CTD-3099C6.11	1.31481103022319	1.10445243120666	1.56523540204251	0.00209199674611177
CTD-3099C6.9	1.04493464583683	0.805322533867293	1.35583988793499	0.740834639856046
CTD-3138B18.5	1.30430499636874	1.04398397398535	1.62953796796151	0.0193397072780623
CTD-3148I10.15	1.32838576466792	1.06322908787654	1.65966935996513	0.0124310791969654
CTD-3193O13.11	0.990929931851253	0.898975178893333	1.09229059143494	0.854507668023491
CTD-3193O13.9	0.948371290868741	0.887713235004446	1.01317415340725	0.115981710579001
CTD-3199J23.4	1.03930575334398	0.946734021699976	1.14092915663298	0.417955846911875
CTDSP1	1.26742377486462	1.05933662342423	1.51638581124442	0.00959990069088505
CTDSP2	1.1905907446927	1.09133702964582	1.29887127701326	8.56628203638359e-05
CTF1	1.06697705397205	0.916581452476147	1.24205004435489	0.402981801036026
CTGF	1.0367942185352	0.965977431347186	1.11280265636109	0.316818103630798
CTHRC1	1.09719220003943	1.02440971051996	1.17514575610215	0.00808220806174494
CTIF	0.837625826201717	0.764792815143384	0.917394895490186	0.000134755978009106
CTNNA1	1.21579661591406	1.0420935187832	1.41845370365038	0.0129861077292697
CTNNA3	0.999639920601009	0.886796578052841	1.12684238481539	0.995298033151209
CTNNAL1	1.31585623374116	1.16870805375566	1.481531356194	5.71765900134984e-06
CTNNB1	1.1573500975691	1.02822273658828	1.30269366809339	0.0154749092147104
CTPS1	1.31110815028752	1.13524264173943	1.51421777032308	0.000227683165818242
CTSA	1.03374311033569	0.905346920210071	1.18034843253076	0.623821775786653
CTSB	1.04449278961466	0.95230503263968	1.14560476965347	0.355817790457479
CTSC	1.0779179179686	1.00414150756701	1.15711483802021	0.0380590436510819
CTSF	0.780595519452208	0.697023719730477	0.874187416784719	1.8088957212926e-05
CTSS	1.05281422045587	0.977515529963936	1.13391322062679	0.174041857356529
CTSZ	1.00144276076936	0.920839554521684	1.08910135123191	0.973136200724913
CTTN	1.41404752905213	1.17796110952945	1.6974502793366	0.000201370607352936
CTTNBP2NL	1.34713056898685	1.16127973902716	1.56272490504237	8.35320654414251e-05
CUBN	1.99375616648341	1.5697791215531	2.53224392961589	1.54384888541262e-08
CUL1	1.19844266313398	1.02856107187153	1.396382632104	0.0202849244290779
CUL7	1.05091458137566	0.875919536031069	1.2608709041384	0.593076978573194
CUX2	0.816872448175336	0.737953881400001	0.904230756699922	9.54131776886531e-05
CWC25	1.48802321724076	1.26269499286873	1.75356131730359	2.094192319182e-06
CX3CL1	0.887609495754259	0.78726930821866	1.00073838612582	0.0514263935346402
CXCL10	1.07702203775438	1.00819121069328	1.15055205550833	0.0276604574410723
CXCL11	1.03470367281655	0.92271279957069	1.16028702651377	0.559421400286123
CXCL9	0.992109716230612	0.889721800319194	1.10628028748544	0.88665454595602
CXCR3	0.939792895020433	0.792359575724817	1.11465894095236	0.47571484564836
CXCR4	1.08559189850663	1.0002396860308	1.17822736546262	0.0493332437752818
CXCR6	0.921262441468943	0.778371279070204	1.09038515279643	0.340237197675017
CXXC11	0.825435245863056	0.766527295013302	0.888870297960074	3.80602159815631e-07
CXorf21	1.10406256412864	0.951738700889118	1.28076555505367	0.19123378242849
CXorf40A	0.917997267703198	0.786746840866937	1.07114377806961	0.277078996349754
CYB561	0.96314003956856	0.848501488304285	1.09326706977733	0.561341890912259
CYB561D1	1.27000286967478	0.985670300119533	1.6363557761521	0.0645517399759094
CYB5D1	1.3829085509096	1.16441162818563	1.64240549809591	0.000220096435111299
CYB5R1	1.02754563956784	0.88598144844079	1.19172928874869	0.719378834162893
CYB5RL	1.24718049600814	1.02913330961274	1.51142633815674	0.0242683290460735
CYBB	1.07042156282095	0.98550393548602	1.16265626233849	0.106590821031816
CYBRD1	1.1445992286366	1.03224205157258	1.26918622642781	0.0104092450640754
CYFIP1	1.37338185109669	1.19005304723159	1.58495263157348	1.42383071481724e-05
CYFIP2	0.772914910449738	0.700774117734254	0.85248219601351	2.57027661252146e-07
CYP17A1	0.746101090062648	0.613203037591462	0.907801824953685	0.00342882835104415
CYP17A1-AS1	0.760342199974119	0.675213034669465	0.85620423685169	6.11115089590804e-06
CYP1A1	0.694633963351801	0.484155983380769	0.996613404780236	0.0478855123113754
CYP21A1P	1.14108032953056	1.03327409485986	1.26013448408206	0.00914988007893698
CYP27A1	1.05325991719728	0.961076254903025	1.15428557048926	0.266829824095024
CYP27B1	1.19834118009997	1.11188822754833	1.29151613295679	2.17869578027426e-06
CYP2A6	0.594637828786588	0.420826771170511	0.84023681868081	0.00321099353791462
CYP2E1	0.869838079806185	0.778608061649368	0.971757579131823	0.0136347916591396
CYP2S1	1.21055070004913	0.964172206304923	1.51988720252117	0.0998217841446613
CYP46A1	0.843772686859081	0.780304134727925	0.912403658270547	2.06613666208931e-05
CYR61	1.01655953071223	0.957443696991166	1.07932537728262	0.591067113269016
CYS1	0.72820854639122	0.631543361698574	0.839669481460424	1.27243719462723e-05
CYSTM1	1.07839115087773	0.961773858544889	1.20914855811411	0.19619224856356
CYTH1	0.908512540399232	0.782819381783776	1.05438758322753	0.206630937822416
CYTIP	1.06095159757962	0.939698357738493	1.1978506540287	0.339317647927342
CYTL1	1.14796003744042	1.04911669191706	1.25611598567951	0.00266702244833779
DACH2	0.75987789775604	0.673440427761307	0.857409795574073	8.31728257936766e-06
DAP	1.23592735070279	1.0856468638123	1.40701038904241	0.00136339977066139
DAPP1	1.02694160212384	0.867344423024732	1.21590573038435	0.757707166290775
DAXX	1.39858962977623	1.17257079265054	1.66817471898311	0.000191364101320594
DBF4	1.29251103311828	1.15443074221798	1.44710696764954	8.53683985081542e-06
DCAF13	1.3221498840689	1.16840029978853	1.49613134835707	9.53513266944013e-06
DCAF15	1.24531673468156	1.08847093596184	1.42476360042406	0.00140197748155594
DCAF4L1	2.4860496135951	1.65689716308584	3.73013052285378	1.08698185633821e-05
DCBLD1	1.23919647415585	1.06771226320009	1.43822259468843	0.00477075595719273
DCBLD2	1.15185637628237	1.04245773423337	1.27273564002868	0.00549267566754547
DCHS1	1.22580665744545	1.08922028388932	1.37952073025319	0.000730598215815161
DCLRE1B	1.51787047454658	1.27133836918302	1.81220895502492	3.93574200615972e-06
DCP1B	1.30020138113356	1.0840713123178	1.5594210568004	0.0046510476544224
DCP2	1.4349818497081	1.13802126129027	1.80943272242298	0.00226653492592901
DCTD	1.26017985545053	1.10339768601355	1.43923925907511	0.000646105502592507
DDB2	1.06896690193569	0.944140917445723	1.21029627709115	0.29248285641661
DDI2	1.47353968392001	1.20476162032891	1.80228118446727	0.000161341641219199
DDIT4L	1.02270782693273	0.924229665396935	1.13167899541535	0.663808964636049
DDN	0.910958641450533	0.864538148794339	0.959871635035055	0.000474531396007573
DDOST	1.44690030280683	1.23290114137021	1.69804408156831	6.07269056288273e-06
DDR2	1.18041521705485	1.07298685823546	1.29859939472705	0.000656916892005316
DDX11	1.24329040697701	1.12631212332301	1.37241800391929	1.56505448446403e-05
DDX19B	1.50874080073068	1.26897582502168	1.79380785583568	3.19771484573086e-06
DDX20	1.77535092807126	1.46520665467704	2.15114428244131	4.64539852805907e-09
DDX25	0.920814652164136	0.848111140220546	0.999750602756696	0.0493092491117825
DDX27	1.12275093929452	0.960358208748418	1.31260363081558	0.14635719061975
DDX47	1.3246294593965	1.13787800354026	1.54203104308359	0.000288025476784835
DDX5	1.3310288354528	1.17337283817177	1.50986771056267	8.76470123286528e-06
DDX60	1.20750178934647	1.06797113230734	1.36526215659482	0.00261586359134442
DDX60L	1.27633875621684	1.12870681073028	1.44328058015982	0.000100069924758071
DEAF1	0.793632959513651	0.713894136007658	0.882278257598181	1.8831899358146e-05
DEDD2	0.880694590760219	0.748786467778624	1.0358399831868	0.124877977660558
DEF6	1.05524061290473	0.955489816866226	1.16540514767146	0.288563379301508
DEGS1	1.15725314059829	1.0146785110422	1.31986123373111	0.029466427332069
DEGS2	0.791816263523919	0.695219354684459	0.901834782009983	0.000437240926927868
DEK	1.22791398990473	1.10041257498415	1.37018860096676	0.000241984161803085
DENND2A	1.24402548664102	1.10240656625566	1.4038372582167	0.000398504806141039
DENND2D	1.13862493551623	1.03884917142414	1.24798361440865	0.00552832117020829
DENND3	1.10643430683233	0.986275593372743	1.24123204869056	0.0846430948758992
DENR	1.17088762746459	1.03099137327918	1.32976654478601	0.0150949734925446
DEPDC1	1.29181476654732	1.14277997136939	1.46028582306182	4.24212930274023e-05
DEPDC1B	1.33275383956142	1.18607428070023	1.49757298153119	1.37571451994313e-06
DERL1	1.22336530130325	1.04194586497068	1.43637276248983	0.0138283919960247
DERL2	1.25774918271184	1.09577740243033	1.44366273944301	0.00111287722331182
DERL3	1.01882403730029	0.898611101743374	1.15511862358149	0.770958295911353
DES	1.04499066846548	0.953276412096662	1.1455287084867	0.347736124986621
DESI1	0.953564366089514	0.78915735087174	1.15222268318385	0.622396671108822
DESI2	1.32462159871455	1.1664436844138	1.50424954348558	1.47182793316477e-05
DFFA	1.62946742138077	1.3155020316164	2.01836562280244	7.78395971935982e-06
DGCR10	0.82050704550522	0.724782198928843	0.928874650506975	0.00177392278349659
DGCR2	0.896923510407429	0.768961121375233	1.04618004884674	0.166011175611973
DGCR5	0.824353444118129	0.751762149087723	0.90395426486167	4.00871660804388e-05
DGCR6	0.839727096024993	0.772844673363872	0.912397562021589	3.70872400466732e-05
DGCR8	1.54451471252956	1.31556617361328	1.8133072627341	1.09381530762825e-07
DGCR9	0.826387027887335	0.737121513965053	0.926462607483791	0.00107699432801389
DGKB	0.879031968493797	0.798520195844879	0.967661438814986	0.00852135713478195
DGKK	0.797292173409817	0.568657617305092	1.11785156909189	0.18890401460151
DGUOK-AS1	1.02348791496237	0.907256366040774	1.15461026373987	0.705821595346945
DHDDS	1.14589683403578	0.930615941598847	1.41097900385983	0.19960094259299
DHH	1.11152451627877	0.917227949754755	1.34697896048534	0.280769353675402
DHRS12	0.941277829856388	0.825291085181423	1.07356539878821	0.367072890276938
DHRS2	0.927426878619536	0.836641319228138	1.02806375374754	0.151744792417642
DHRS9	0.916524528314967	0.837448390070681	1.00306743790155	0.058300058302036
DHRSX	1.24713904595185	1.0633739999684	1.46266111451278	0.00661792669591037
DHX15	1.31029945094809	1.14734112330109	1.49640295835914	6.65246274480587e-05
DHX16	1.37911111853722	1.11452444855878	1.70651032351282	0.00310012086344472
DHX34	1.30452995630664	1.1099574718848	1.53321046076803	0.00125600549084906
DHX37	1.36187324030226	1.10971206361917	1.67133329757859	0.0031124035300747
DIAPH3	1.3936127740459	1.16164896069671	1.67189626960891	0.000352808738340411
DICER1-AS1	0.968570296473048	0.882390981663759	1.06316637262207	0.501795194668548
DIRAS3	1.12480129702852	1.03339521311848	1.22429245049346	0.00653609204844649
DISP1	1.28883807446984	1.05881725348446	1.56882934872528	0.0114138239506195
DISP2	0.789867567437665	0.722233741315885	0.863834986376	2.40678579625457e-07
DKC1	1.3852456197522	1.21083206135415	1.58478247172991	2.07171515726053e-06
DLG2	0.908849147650372	0.834261385995612	0.990105483785571	0.0287017613229928
DLGAP1	0.865361414066561	0.799234455911803	0.936959576024478	0.000363256991568249
DLGAP1-AS2	1.25027575773999	1.11373637118969	1.40355429779357	0.000153311611734694
DLGAP2	0.764438419740077	0.645523517756779	0.905259191183928	0.0018472198502812
DLGAP3	0.850043110304206	0.787422146443103	0.917644103153073	3.16468078606921e-05
DLGAP5	1.23973908853531	1.12597684174767	1.36499522073368	1.20829862017126e-05
DLL3	1.05488352245066	1.00114830523441	1.11150290133825	0.0451787128491697
DLL4	1.04287119099541	0.933135610383583	1.16551153862954	0.45930142538923
DMBX1	1.19809518808411	0.933429324992556	1.53780478208326	0.155881419041473
DMPK	1.15165006584048	1.04517030859787	1.26897775725149	0.0043375802837267
DMRTA2	1.05649247634611	0.976974540965969	1.14248253743884	0.168671632670694
DMRTC1B	0.839992614687343	0.763790014119171	0.92379787596855	0.000326252128009852
DMTF1	1.34612182311976	1.19615010873873	1.51489679216763	8.1427575347365e-07
DNAAF3	1.08671356153353	0.990925448052068	1.191761062492	0.0773397674973697
DNAH11	1.16535370435759	1.03452833378416	1.31272311439979	0.0117793415762198
DNAH9	1.14014784936458	1.0419574486795	1.24759136763034	0.00431082465761712
DNAJB1	1.15350524092721	1.03464171558708	1.28602425438794	0.0100609234017483
DNAJB11	1.12098874998269	1.00708606414657	1.2477739711875	0.0366966004539893
DNAJC1	1.27294115508677	1.07681736601642	1.50478552394459	0.00470004987516831
DNAJC10	1.30400205140747	1.1534173464981	1.47424638205551	2.23817978618137e-05
DNAJC12	0.894697549239219	0.807647243162984	0.991130362161252	0.0331258441682736
DNAJC16	1.37888603073068	1.142300296082	1.66447184883485	0.000821982426531674
DNAJC2	1.54936609373292	1.33091624330032	1.80367119606003	1.63641526404428e-08
DNAJC21	1.1283268387684	0.968922764858642	1.3139555610202	0.120256402611298
DNAJC22	1.35858760997299	1.17263249001331	1.5740313437428	4.49447594961481e-05
DNAJC3	1.08790839830391	0.937490330496917	1.26246068316549	0.26709701184345
DNAJC8	1.37018591768352	1.17796748782051	1.59377017483889	4.43140035358487e-05
DNALI1	1.25775830835739	1.14783486292919	1.37820867211248	8.88508413560161e-07
DNASE1L1	1.07803094570154	0.94226454990516	1.23335927262373	0.273935709005522
DNER	0.98508360945238	0.899528462555444	1.07877600098943	0.745783560427288
DNM2	1.27936683411686	1.07713347733462	1.51956979397618	0.0050105335074135
DNM3	0.907303924599468	0.815298282734377	1.00969231632957	0.0745612205899423
DNMBP-AS1	0.647526269395675	0.495518859309211	0.846164099873013	0.00145441607466126
DNMT3A	1.41281896481767	1.2133013947854	1.64514558041986	8.62346470091475e-06
DNMT3B	1.76779525188244	1.4309854928851	2.18387961870766	1.27118655449115e-07
DOC2GP	0.800606128129191	0.664628690186068	0.964403405785221	0.0192006941514142
DOCK11	1.39511714420808	1.1871149874622	1.63956471497693	5.29482015348566e-05
DOCK2	1.07017236217357	0.953853738119311	1.20067557424292	0.248003119018889
DOCK3	0.839323828216003	0.746631220041573	0.943524017883877	0.00335060162745116
DOCK7	1.47108056035904	1.28358498186388	1.68596395691996	2.87447626104305e-08
DOK2	0.983137123482366	0.89448041420102	1.08058107055652	0.724310635551898
DOK3	1.14151177567536	1.02682621906259	1.26900648796744	0.0142855680229926
DONSON	1.17549469655323	1.04798839361414	1.3185143939042	0.00577843432879486
DPAGT1	1.36781373189358	1.18530447847572	1.57842515499698	1.81505545491581e-05
DPEP1	1.15482751721202	1.08448502132612	1.22973260882782	7.14292626973988e-06
DPH2	1.63093289170694	1.34811687302054	1.97307974589162	4.79978102089102e-07
DPH3	1.43260766864394	1.22254977042349	1.67875761127211	8.83805006227376e-06
DPM1	1.10314956993206	0.993337334104477	1.22510141505796	0.0665046599688977
DPP3	1.24499037820705	1.05644516967679	1.46718550694148	0.00891445208665862
DPP4	0.934526687025555	0.837681047865197	1.04256880466454	0.225082328634309
DPP6	0.903106702844756	0.820599223558471	0.993909929851415	0.0370753384069126
DPP9	1.46505514891819	1.21325740772863	1.7691106402474	7.21650471195608e-05
DPY19L1	1.27389282802528	1.1409716960714	1.42229903062617	1.66546540885349e-05
DPYD	1.04839989459073	0.96055859286405	1.14427412043715	0.289757651178605
DR1	1.27267602181345	1.11442118654706	1.45340404153426	0.00037224397938413
DRAM2	1.38462243546492	1.21652527435193	1.57594694431164	8.30727457289994e-07
DRAXIN	1.25897755669628	1.15082050320645	1.37729948662601	5.03136237193795e-07
DRD5	0.596516019403136	0.456673939323866	0.77918035334224	0.000150269325559144
DRP2	0.908524051238114	0.794402219375991	1.0390403394473	0.161283688220934
DSCAM	0.991221871977718	0.901161694450929	1.0902824715443	0.856039177760612
DSCAML1	0.841004864858555	0.75771314388753	0.933452439648772	0.00113734295495416
DSCC1	1.30870321514089	1.11830204911009	1.53152192351166	0.000797093257652567
DSE	1.0983648374399	0.989579765523991	1.21910871478417	0.0778804271568055
DSG2	1.08010505170244	0.930803357038624	1.25335487231673	0.309995374435985
DSN1	1.17826084602166	1.04212976429625	1.33217442667055	0.00882533493771777
DTL	1.22319425878759	1.10554806974078	1.35335969161589	9.43241124774335e-05
DTX1	0.905611661773654	0.816800171859439	1.00407971275693	0.0597475198350859
DTX2	1.19113697748804	1.03877740243826	1.36584343845858	0.0122527250541768
DTX2P1	1.47350731110944	1.19586043097148	1.81561638771604	0.000273584450978458
DTX3L	1.19389245671693	1.05839879250289	1.34673169348092	0.00393372931688777
DTYMK	1.15443927626824	1.04335245301929	1.27735362938385	0.00540103736254246
DUSP10	1.52011262544955	1.31439648126266	1.7580253956792	1.65307325067505e-08
DUSP14	1.30275647416357	1.13709501235379	1.49255287600105	0.000138164815481456
DUSP26	0.880777649067774	0.812656473239014	0.954609103161836	0.00199465541014817
DUSP5	1.00347124093674	0.908083388420287	1.10887892480758	0.945788870311726
DUSP6	1.10693976451125	1.02009501613865	1.20117795192686	0.0147999024638768
DUSP9	0.909305813440429	0.797322085534424	1.03701763359829	0.156226767907415
DYNLL1-AS1	1.28210608142219	1.05623886200126	1.55627298251956	0.011959477102
DYNLT3	0.917874436945574	0.83329706774766	1.01103617738072	0.0823105203978143
DYRK3	1.24442515581242	1.09899686386171	1.40909771387085	0.000563252644324875
DYX1C1	1.48579859008574	1.28276990829901	1.7209613633891	1.27949139957892e-07
DZIP1L	1.26631135213171	1.10726179049497	1.4482071487546	0.000565072529189676
E2F1	1.15786468957033	1.04780553230877	1.27948421535795	0.00402326046574366
E2F2	1.32564067670911	1.16947487979645	1.50266006915143	1.04320203922369e-05
E2F3	1.44808729126656	1.27733961285405	1.64165957277591	7.30148752542428e-09
E2F4	1.74471785883338	1.41198300279167	2.15586193382902	2.52893008216188e-07
E2F6	1.56057294910686	1.3262445721614	1.83630378634846	8.26385887018363e-08
E2F7	1.21973346794209	1.05106635655253	1.4154669907786	0.00890007262742293
E2F8	1.35532937225344	1.17475797459107	1.56365629944528	3.07606323288708e-05
EBF2	1.16273693228373	0.932427998452774	1.44993197967023	0.180650395395845
EBF3	1.47548990190027	1.28583652960986	1.69311603806296	2.99844188582636e-08
EBNA1BP2	1.26034878169406	1.07533957530105	1.47718831149034	0.00428016866398364
ECE1	1.23694164593689	1.09549271567362	1.39665432144134	0.000599213828131964
ECE2	0.853290146111994	0.755866908203962	0.963270207425667	0.0103192235313239
ECM1	0.938585133572802	0.842364597408184	1.04579662497022	0.250749265767127
ECM2	1.20377088673068	1.10342789685594	1.3132388186571	2.96309861105378e-05
ECSCR	1.05773278625136	0.982921238360282	1.13823834855522	0.133694551074693
ECT2	1.32545025566357	1.18732619261977	1.47964257097901	5.22080974138951e-07
EDEM1	1.16947405475708	1.01333838311835	1.34966718673109	0.0322589792409608
EDEM2	1.24997945478815	1.07313080363654	1.4559722189483	0.0041464431893079
EDN3	0.830521715098463	0.752235703011174	0.916955040140984	0.000236660704748742
EED	1.36011870005347	1.15083008771924	1.60746829438687	0.000308746108616054
EEF2K	1.32713806588334	1.15209427618919	1.52877718631018	8.78752686040101e-05
EFEMP1	1.0835221544519	1.02016919377472	1.15080936216483	0.00906572690275954
EFEMP2	1.03848444470064	0.949082324721621	1.13630810920594	0.410983761851886
EFHC1	1.20004370739894	1.07095107751609	1.34469718542876	0.00168699980111512
EFHC2	1.1861627841704	1.04931040303134	1.34086362480182	0.00634279019629821
EFNA1	1.20037999619337	1.08152623143406	1.3322951338412	0.000596463687990496
EFNA4	1.19184237817183	1.03773559244079	1.36883447455555	0.0129806730502236
EFNB1	1.37189994638218	1.20126474525859	1.56677324487557	3.07252954535105e-06
EFNB2	1.09412068945984	0.982861837242386	1.2179739183513	0.10017251806741
EFTUD2	1.50349264761585	1.25376106276578	1.80296725474016	1.08178481770325e-05
EGF	1.15474785641319	0.982221270071226	1.35757863581407	0.0813874796155209
EGFL6	0.974464615933664	0.830518738672025	1.14335925667986	0.751101328379
EGFLAM	1.05038972025759	0.947809944378164	1.1640715218985	0.348429293567232
EGR1	1.00111211046398	0.94492863914842	1.06063613292624	0.969912618424912
EGR2	1.01892681543103	0.952649692463294	1.08981492716371	0.584796709390929
EHD2	0.972483125149869	0.878597832378812	1.07640082168277	0.590119436137079
EHD3	0.847599349933391	0.766847062066899	0.936855200398267	0.00120861206463366
EHD4	1.05642331870318	0.943850370814747	1.18242283184831	0.339693253647119
EID2	1.07359952219442	0.929229233136971	1.24039999276066	0.335139695937775
EID3	1.0936075226061	0.907911925192327	1.31728351651213	0.345959684359601
EIF2AK3	1.21384279641765	1.07043135606335	1.37646783800662	0.00251974631583187
EIF3I	1.5565306656264	1.2888165124322	1.87985464933498	4.33112607889872e-06
EIF3L	0.982445158635098	0.898606752205987	1.07410553877553	0.697159831935679
EIF4E	1.10875459860986	1.02343701386712	1.20118458027366	0.0115030730563557
EIF4E1B	0.745334151028272	0.647357428104658	0.858139526282262	4.35915979158001e-05
EIF4E2	1.06892797485544	0.906139811541926	1.2609610579677	0.429097716301658
EIF4G1	1.28314211281563	1.11331853850801	1.47887026464809	0.000577533319768026
EIF4G2	1.15047430706278	1.02922670815572	1.28600542594094	0.0136266398943253
ELAVL1	1.36822861084848	1.18653612793424	1.5777433889043	1.6120070533579e-05
ELAVL2	0.882281214753903	0.813691742851332	0.956652379413228	0.0024197512197701
ELF4	1.16540014771161	1.01600170382167	1.33676695538754	0.0287598078200045
ELFN2	0.897143459911317	0.830484994272489	0.969152234191441	0.00586197064967993
ELK3	1.28528933813345	1.1419946643844	1.44656427410722	3.16173996068374e-05
ELK4	1.38302978850065	1.18883102489619	1.60895144543118	2.66254876159085e-05
ELMOD2	1.44325294800479	1.20649135423086	1.72647658403853	5.98837906901645e-05
ELN	1.04947577470545	0.974978962072163	1.12966478717936	0.198633696109415
ELTD1	1.14268810561198	1.02842518181108	1.26964618311627	0.0130869426916149
EMC1	1.34838582002811	1.16099705491241	1.56601975169527	9.0274926559706e-05
EMC3	1.15928909332285	0.998934268745222	1.34538502076365	0.051663651942959
EMD	1.38177152884183	1.17963677015327	1.61854276352358	6.14289565184902e-05
EME1	1.26562716034223	1.14810131530977	1.39518358496415	2.164147308999e-06
EMILIN1	1.05699814621901	0.987755353018609	1.13109493934515	0.108810107238509
EMILIN2	1.09844139765941	1.01091041922992	1.19355135839938	0.0266859388499028
EMILIN3	1.02805138616018	0.961016177074892	1.0997626031674	0.421314462409991
EML4	1.49479783038925	1.27101880974213	1.7579759926525	1.18373093767627e-06
EMP1	1.14716663285573	1.07376772335926	1.22558282849153	4.70762180526612e-05
EMP3	1.11237053919048	1.04089250863292	1.18875696212287	0.00167386512222437
EMR1	0.990744940197981	0.881054218134423	1.11409209141104	0.876574994671843
EMR2	1.09369456288599	0.971362128067817	1.23143342974029	0.138910385204824
EMR4P	1.36255097755075	1.13346497078288	1.63793784041	0.000988214266689333
EMX2OS	0.792366175118576	0.723619928714845	0.867643538490017	5.00836037136514e-07
EN1	1.26164907663281	1.16652606733765	1.36452878091382	6.2040277800489e-09
EN2	1.27261380775959	1.14075644768208	1.41971225057825	1.56242972628834e-05
ENG	1.06333203737423	0.964342120361779	1.17248328972943	0.218065668236433
ENHO	0.895935327174628	0.839790493143593	0.955833766913406	0.000874692922303736
ENPEP	1.16801331879534	1.05204025568649	1.29677082745572	0.00360504812799429
ENPP1	0.983215394287255	0.793644124717763	1.21806799981947	0.876907773249651
ENTPD3	0.74894425894878	0.652344170391295	0.859849031341664	4.07638063273824e-05
ENTPD7	1.29675491016515	1.06832134992561	1.57403322245178	0.00857821546465561
ENTPD8	1.26775534836254	1.0305634169493	1.55953878904369	0.0247795983680611
EOGT	1.11177976295494	0.94618583475782	1.30635462496911	0.19784234755037
EOMES	1.18607183118286	0.89392257740451	1.57370047953144	0.236908037818136
EPB41L4A-AS1	0.87405595271211	0.792782016012343	0.963661880619124	0.00686527022563924
EPB42	0.684300762360319	0.469284173733379	0.997833635943065	0.0486972150768185
EPHA1	1.08992682737991	0.954277218979433	1.24485889992521	0.20414939739273
EPHA10	0.809819513576934	0.721559533579042	0.908875309729578	0.000339933314835751
EPHA2	1.10048119892854	0.99155553445874	1.22137270894895	0.0717825348190318
EPHB1	1.07048521155775	0.97678033588353	1.17317942025042	0.145032390571373
EPHB2	1.24464124718999	1.1091742203969	1.39665329911142	0.000197371965673194
EPHB4	1.0919675819247	0.981415815801648	1.21497247219365	0.106200185243269
EPHX3	1.11939582186807	0.870438292697743	1.43955868730469	0.379504084217112
EPS8	1.18042619531934	1.045522411233	1.33273661819725	0.00738611579266811
EPSTI1	1.09230570450327	0.985541629630421	1.21063556953734	0.0924837304467047
ERBB2	1.17548893395894	1.03967056479375	1.32905006706048	0.00985162881947267
ERCC6L	1.36582947040808	1.13753587366956	1.6399396145788	0.000835075468206332
ERF	1.21706537588654	1.07010927377561	1.38420268423207	0.00277124860226982
ERGIC1	1.2138093934415	1.06472339289559	1.38377089621369	0.00375633900914587
ERI1	1.2999006822786	1.14067747093977	1.48134930936809	8.34462375346665e-05
ERMAP	1.32916203637665	1.10243672747945	1.60251529626028	0.00286400099241883
ERP27	1.27708275234597	1.10797323965957	1.47200338235665	0.000738917126120725
ERP44	1.61527497412058	1.37261870102553	1.90082886097273	7.77132245353803e-09
ERRFI1	1.05687378330391	0.947291215990526	1.17913285268581	0.321966052782539
ERVK3-1	1.01191923575277	0.88590577493904	1.15585716749271	0.861379237641778
ESAM	1.05175870849856	0.950592716935004	1.16369120149507	0.328080616804328
ESCO2	1.3014517898193	1.14617373477748	1.47776616217147	4.8115210172206e-05
ESM1	1.02593421406666	0.966761941773877	1.0887282236838	0.398265095050026
ESPL1	1.23671851572183	1.12675063733947	1.35741896782119	7.76147861835289e-06
ESYT1	1.29332825862146	1.08998604543573	1.53460495347915	0.00320608913535681
ETF1	1.18500433844587	1.01493271238227	1.38357475821178	0.031754854580574
ETHE1	1.00083514822824	0.880821245957176	1.13720121821147	0.989780082844395
ETNPPL	0.938569388115612	0.893062186604928	0.986395471133535	0.012414162827115
ETV6	1.29215505985811	1.10486566980284	1.51119248642676	0.00133578559215786
EVA1B	1.04160489472806	0.962595340313544	1.12709953111561	0.311162805053502
EVA1C	1.00076083595229	0.921194652421655	1.08719937544481	0.985644209952298
EVC	1.16791551149987	1.03442048266342	1.3186384694258	0.0121962259067867
EVC2	1.29559690565218	1.07122662570737	1.56696193097991	0.00760551421307492
EVI2B	1.11574646322743	1.00960595470617	1.23304559011524	0.0317608899506369
EVI5L	0.856347155798955	0.728929473202835	1.00603759102069	0.0591966248588738
EXO1	1.36187883106604	1.20595021522754	1.53796892034707	6.41007943496335e-07
EXOC3L1	1.08085997765787	0.983378992902768	1.18800411614862	0.10687353817242
EXOC3L2	1.01098091281888	0.905787282924124	1.12839120768458	0.845536347377719
EXOSC10	1.57997951743724	1.35278702973671	1.84532762411764	7.70378657460272e-09
EXOSC3	1.27552912065855	1.10816583788498	1.4681688263854	0.000696048483460505
EXOSC9	1.26459847325538	1.08888691304107	1.46866426568901	0.0021005582136648
EXT1	1.20908572101493	1.06372444822658	1.37431106636631	0.00366963542077946
EXT2	1.33255756578537	1.14462052663903	1.55135228209291	0.000214449878134487
EXTL2	1.47633401913659	1.28054596924047	1.70205692604129	8.0259963219493e-08
EYA1	1.11002455324994	1.00838655624057	1.22190691773143	0.0331371088950174
EYA3	1.71854692591059	1.36144175460748	2.16932052110319	5.21067983831009e-06
EYA4	1.07551757865423	0.971671833869548	1.19046165760277	0.159942811425614
EZH2	1.2279376027868	1.12537197098715	1.33985099612456	3.94838351834739e-06
F2R	1.21379479691005	1.12168922711709	1.31346345617716	1.49397674398039e-06
F2RL1	1.15645782844867	1.02140790892801	1.30936396447513	0.0217741281664891
F2RL2	1.20935311233935	1.07544028092763	1.35994064594953	0.00150024269629597
F2RL3	1.01405424361252	0.835174601627997	1.23124674407495	0.887910463655526
F3	1.17321527395783	1.08029304685624	1.27413027701467	0.00014798082097708
F5	0.963965290603428	0.894015657888642	1.03938792714511	0.339654224896302
FA2H	0.964533237988041	0.907685600497871	1.02494119844295	0.243973187914243
FAAH	0.976904532208711	0.907040206547435	1.05215012318201	0.537106111422927
FABP5	1.05424623362425	0.990712320402645	1.12185454669546	0.0957666964360511
FABP5P7	1.04023343874229	0.941001629171368	1.14992957879412	0.440623951844078
FADD	1.31033502503948	1.14050527470289	1.50545369313833	0.000135473832319342
FADS1	1.06323379729898	0.933816176776468	1.21058741091975	0.354489845143587
FADS2	1.0620771174332	0.965327067092563	1.168523956106	0.216515009339397
FAF1	1.16949066036284	0.962430561203157	1.421098269122	0.115302503122432
FAIM	1.30016889880999	1.13369888156175	1.4910830317695	0.00017328061855473
FAIM2	0.839369895616552	0.779927526264706	0.903342679853334	2.97560787043421e-06
FAM101A	0.799717366701196	0.690466059436614	0.92625532835797	0.0028627479823887
FAM101B	1.04656363217323	0.927333315628397	1.18112378551331	0.460827247607151
FAM109B	1.03793518142267	0.898153091031576	1.19947195148832	0.613904999916692
FAM110B	0.92667180347185	0.834593313007995	1.02890907219807	0.153800048903105
FAM111A	1.24042600557426	1.1053902558308	1.39195787839516	0.000248439454507879
FAM111B	1.19888962854762	1.0720263216954	1.34076590504411	0.00147905518998473
FAM114A1	1.30371359126707	1.1659263712807	1.45778427345073	3.26129087101179e-06
FAM115C	1.2470653528571	1.07590654075484	1.44545268142484	0.00337545191590002
FAM115D	1.18641748078243	0.897537907309546	1.56827519734012	0.229879169733593
FAM117A	1.37928180240889	1.14408841841699	1.66282453334209	0.000748561765146219
FAM120A	1.34274583750205	1.13880116478701	1.58321438358055	0.00045433896833152
FAM120AOS	1.32883170294456	1.1419527960933	1.54629306989871	0.00023641697173149
FAM122B	1.14169367211221	1.0073325975425	1.29397623398767	0.0380488456249945
FAM124B	1.24856262564506	1.02654410792603	1.51859878023868	0.0262689391098057
FAM126A	1.18812700746264	1.07735473536052	1.31028874662135	0.000556242863151609
FAM127B	1.13458393521569	1.02071304130457	1.26115828245346	0.0192897225385236
FAM129A	1.11354781029911	1.01247604574607	1.224709197844	0.0267355032660052
FAM129B	1.15940273934547	1.03927544018857	1.29341525838219	0.0080430280832796
FAM131C	0.895014590180779	0.816271659229668	0.981353581958776	0.01824772859718
FAM132B	1.09720523360278	1.0091265400258	1.19297162139303	0.0297987894411208
FAM133A	0.82687254582084	0.70586373527453	0.968626340842288	0.0185319673506578
FAM133B	1.44677532847768	1.29002510910071	1.62257217811123	2.74585999376982e-10
FAM134A	0.741084501798027	0.612930476720413	0.896033497540946	0.0019801008130409
FAM136A	1.47429192664631	1.24389024199309	1.7473701550161	7.56580658058751e-06
FAM13C	0.780735287974779	0.699975447616476	0.870812814884672	8.87379651554614e-06
FAM149A	0.856962597668447	0.760430054463235	0.965749432827236	0.0113570152582353
FAM149B1	1.0410392274102	0.892929221149879	1.21371621326402	0.60749594634711
FAM155A	0.850514503566943	0.776629024026196	0.931429161670533	0.000479479240507401
FAM155B	0.999864701427858	0.839053482286728	1.19149665935095	0.998793253901203
FAM159B	0.77593720864747	0.647580069770975	0.929736074145334	0.00596650016007747
FAM163B	0.927668029735713	0.883142257582301	0.974438677353792	0.0027739122738459
FAM167A	0.990891608869202	0.899934087773282	1.09104232617395	0.852239822086744
FAM169A	0.894779444571866	0.796171586504265	1.00560013444294	0.062010181459306
FAM181A	1.13343908329594	1.05288397042718	1.22015738830322	0.000868494915677617
FAM181A-AS1	1.18376205430876	1.0718960757292	1.30730266949436	0.000866036385416304
FAM183A	1.08043556585165	1.02168011417977	1.14256996466487	0.00669238315235113
FAM187A	1.15763879309667	1.08315650424528	1.23724278996605	1.60211726258112e-05
FAM188B	1.13115394467518	0.994730990789219	1.28628670304025	0.0601900955663302
FAM196B	0.824503954271242	0.691667252257425	0.982852330206758	0.0313238992558698
FAM19A1	0.797996553290157	0.714781979378867	0.890898927832984	5.91965732662799e-05
FAM19A2	0.855990069484317	0.780215480061335	0.939123893053449	0.00100873580575957
FAM19A3	1.05503662207397	0.907802214481504	1.22615064841301	0.484787589313579
FAM19A5	0.901095026687782	0.826981165855781	0.981850954587587	0.0173965436614617
FAM201A	0.993372970845206	0.888680770912218	1.11039857224873	0.906846540965608
FAM206A	1.65060649040489	1.41651789791187	1.92337971174455	1.34299205996244e-10
FAM20A	1.03603600128807	0.961169370964068	1.11673408286864	0.35492851669976
FAM20C	1.08975795661772	1.00629926152114	1.18013840357635	0.0344781819651396
FAM211B	0.993430972989725	0.883338327924325	1.11724473726205	0.912427347854746
FAM213A	0.907791260986695	0.81617402559799	1.0096927219903	0.0747076678185038
FAM214B	1.23689094036492	1.02701746415606	1.48965256361437	0.0250281100888684
FAM221A	1.15011710388953	1.02654557622173	1.2885636870871	0.0158770049092319
FAM222A	0.938819152935227	0.856819645960404	1.02866619138977	0.175778749987359
FAM222A-AS1	0.804042692877021	0.642752376933032	1.00580670748152	0.0562261200305368
FAM26E	1.02676296177433	0.742388514467298	1.42006800903711	0.873177883325288
FAM26F	0.990595292780919	0.909370193636305	1.07907543148722	0.828618848147105
FAM3C	1.11675334631063	1.00957865183946	1.23530547543144	0.031940405606129
FAM3D	1.07064776142373	0.788681790313122	1.4534209400049	0.661582493961815
FAM43A	0.919920466377853	0.810310351817025	1.04435746447423	0.197236173839049
FAM45A	0.855126007721392	0.742213276474206	0.985216126226139	0.0303031102364943
FAM46A	1.193179911143	1.07075477589968	1.32960256857971	0.0013854791096285
FAM46B	1.07844329477255	0.956201933324194	1.21631205659312	0.218576089694333
FAM46C	1.08820484765568	0.895838669725415	1.32187840342312	0.394385724831697
FAM47E-STBD1	1.12774258644194	0.961250548507714	1.32307164167465	0.140197250772279
FAM57B	0.838003854153199	0.76930273623659	0.912840194760008	5.13199406528266e-05
FAM64A	1.20132654909594	1.12399743766024	1.28397577183713	6.54207034309884e-08
FAM66C	0.923318282373337	0.798065671744426	1.06822869438978	0.283446191980402
FAM72B	1.34539077988182	1.11695042379236	1.62055209616671	0.00177858564362236
FAM72D	1.54083906865362	1.28468696800004	1.84806501087608	3.15352842570165e-06
FAM76A	1.51249989213843	1.22688545576693	1.86460432224191	0.00010666084284403
FAM81A	0.82879344449389	0.748196537547967	0.918072376928114	0.000321202416204314
FAM83D	1.25487839408596	1.13363580126392	1.38908790829299	1.18992732608887e-05
FAM86B3P	1.15240545348138	0.979948522226722	1.35521233931344	0.0863330508028449
FAM86C1	1.3478923457955	1.09077351931834	1.66561962100939	0.00570006419195567
FAM86DP	1.22389065531168	1.0530679447	1.42242325739577	0.00843533100398695
FAM87B	1.54469879110479	1.00424199392461	2.37601531271928	0.0477899329113373
FAM91A1	1.26438148882533	1.12358093383269	1.42282634133966	9.84666324487712e-05
FAM92B	1.16915668652305	0.984388416377226	1.38860569151367	0.0749642940556317
FAM95B1	1.15498526651312	1.07532771700212	1.24054364522601	7.7554311040267e-05
FAM96A	1.18845916516031	1.0735808656199	1.31562999349656	0.000872096941189944
FANCA	1.20523617449142	1.08020151433286	1.3447437510767	0.000836296488091365
FANCB	1.74730271572304	1.30455865522922	2.34030625463649	0.000181670011875447
FANCC	1.6470187748392	1.41502107333131	1.9170533187089	1.18334939908809e-10
FANCD2	1.30377493985321	1.17828645964052	1.44262804675515	2.78723308469517e-07
FANCF	1.46051317474853	1.22351603042833	1.74341707061024	2.75279004629985e-05
FANCI	1.18141597460498	1.0805367802874	1.29171327669253	0.000251370120337176
FAP	1.02306502052178	0.937103478334865	1.1169119103848	0.610584855894188
FAS	1.06644182297045	0.967022272848341	1.17608269603827	0.197623514205279
FASTKD5	1.20321123983505	1.00045659433767	1.44705656982933	0.0494359609941511
FAXC	0.910654369749942	0.81330924229385	1.01965075277608	0.104677875971633
FBLIM1	1.13839484084206	1.06433030112202	1.21761337837477	0.000159134740624707
FBLL1	0.898784274302977	0.835134161813905	0.967285507731794	0.00440614820943594
FBLN5	1.08574265894842	1.00663862513589	1.17106287402914	0.0330564709765165
FBLN7	0.919164239503173	0.836215767301705	1.01034079028149	0.0806772606814867
FBP1	1.04560584333357	0.946532666983331	1.15504896740406	0.379911795780152
FBXL12	1.41095350593844	1.20229970487541	1.65581825217722	2.48235327989467e-05
FBXL15	0.870877295952587	0.801711629944855	0.946010056830355	0.00105842588861007
FBXL16	0.922755817529432	0.869831174712173	0.978900645939902	0.00763966847126278
FBXL5	1.43425231873046	1.23055329503736	1.67167055834119	3.94036168043472e-06
FBXL7	1.24175981260455	1.06232554455779	1.45150179255227	0.00654312710914423
FBXO17	1.09639683751268	0.979542832489745	1.22719087459649	0.109487811483891
FBXO32	1.02146889446103	0.946541961235764	1.10232693856405	0.584725370696321
FBXO39	1.16262183423375	0.951851117093157	1.42006402594236	0.139827288153467
FBXO4	1.17154781326355	1.019053565597	1.34686175987081	0.026065200235803
FBXO41	0.850234138937785	0.771310361232153	0.937233735406408	0.00109813317711621
FBXO42	1.74931868272465	1.43472687211075	2.13289087506079	3.22720498103738e-08
FBXO43	1.4145798578713	1.13671473763961	1.76036793404326	0.00188096036601558
FBXO46	1.35412254608689	1.14140169250646	1.60648777889425	0.000507470101210207
FBXO5	1.25606703980483	1.12617376076316	1.40094225549611	4.24936915484171e-05
FBXW2	1.31734473047444	1.14756137977409	1.51224777122633	9.03665165100448e-05
FBXW4	0.737442410398084	0.630121230992271	0.863042351068482	0.000147343436377756
FBXW9	1.23088204785379	1.08211192818968	1.4001052721629	0.00157410145516152
FCER1G	1.09620997941372	1.02541845820977	1.17188871464649	0.00699874336454065
FCGBP	1.08170404362779	1.01984484311616	1.14731534497493	0.00894891227224618
FCGR2A	1.09308316443662	1.01155849062753	1.18117816759519	0.0244132744742787
FCGR2B	1.00093332415798	0.939466568225555	1.06642168363932	0.976983809122774
FCGR2C	1.07495051113725	1.00648777160772	1.14807018424919	0.0313527896261349
FCGR3A	1.08432987426539	1.01636577587088	1.15683871312662	0.0142261495958737
FCGRT	1.03558067355476	0.946245209528415	1.13335034158281	0.447514218064542
FCHSD1	1.28736207388281	1.10418728264908	1.50092392415152	0.0012572541747889
FCHSD2	0.971425327247107	0.847246348500036	1.11380493771123	0.67781908356162
FDFT1	0.877064644799245	0.770943110227776	0.997793975912895	0.0462037597355735
FDX1	1.30110962805811	1.10621560048508	1.53034025508516	0.00147683510168441
FEM1C	1.1893268956811	1.05408463901234	1.34192114412729	0.0048750557528864
FER1L4	0.995827777416408	0.911356381020991	1.08812862116918	0.926343061485385
FERMT1	0.945423643220645	0.869916410621952	1.02748477238353	0.186330603856683
FERMT3	1.06459050646503	0.979399362602829	1.15719183586508	0.141341908149728
FES	1.0126040103651	0.890054697234999	1.1520268192425	0.849069329726405
FEZ1	0.926027122770511	0.839027764733843	1.02204750325355	0.126828397053806
FEZF1-AS1	1.14854059404431	1.0592608035627	1.24534533113174	0.000795413945318506
FGF11	0.94559206712872	0.850375283610267	1.05147030334734	0.301549371922116
FGF13	0.913874897659626	0.847865360057427	0.985023528400576	0.0185501209809443
FGFBP2	1.08191531000443	1.01067488631975	1.15817732672113	0.0234819712629693
FGFBP3	1.00530878182326	0.914185924951086	1.1055144464897	0.913029277533734
FGFR1OP	1.40314033239223	1.19991036592684	1.64079155267987	2.2067803842419e-05
FGFRL1	1.12462228974477	1.0138283103472	1.24752414356789	0.0264528095182752
FGL2	1.03129547292222	0.926576724894496	1.14784920006593	0.572703736255841
FGR	1.10298360968078	0.985002788751671	1.2350958363948	0.0894756228531243
FHAD1	1.06401182651141	0.937553880691138	1.20752651156601	0.336488844845445
FHDC1	1.0932853148775	0.934612897362094	1.27889608960073	0.264958363092287
FHL3	1.17894684318787	1.03778130619382	1.33931460392201	0.0114100675340225
FHOD1	1.25264390433656	1.11062701660358	1.41282062079677	0.000243520987455685
FILIP1L	1.21039843056167	1.10300432112141	1.32824897659208	5.62403098145573e-05
FIZ1	1.06579820623467	0.887419308971472	1.28003279276127	0.495306312699819
FKBP10	1.19069841992759	1.09305095856793	1.29706919526931	6.38973441515871e-05
FKBP11	1.11880766817107	1.0010358435891	1.25043534292485	0.0479053319358492
FKBP14	1.15969525116634	1.02737616015028	1.30905614490901	0.0165342280518569
FKBP15	1.62017764494153	1.37749503868599	1.90561528531695	5.59957599455011e-09
FKBP1A	1.03611396824058	0.918990840507056	1.16816415122367	0.562143490311966
FKBP7	1.25137321629327	1.1161975751122	1.40291912594305	0.000120684186019041
FKBP9	1.16066334795036	1.04565120175738	1.28832578685059	0.00513562298182752
FKBP9L	1.14080828750934	0.998520014585204	1.30337252117138	0.0526020398202506
FKRP	1.05725347279603	0.889428535154559	1.25674504646405	0.527846671078167
FLII	1.27566459245796	1.11522572094739	1.45918455957822	0.000384905047938546
FLJ30594	0.956751085995131	0.878462711064825	1.04201650112536	0.310085613184039
FLNA	1.11955402017717	1.045287551827	1.19909703497772	0.00126096332532096
FLNC	1.13992390258361	1.06354357732839	1.22178962045504	0.000214796319599031
FLRT1	0.869656816561246	0.776301585375059	0.9742386114361	0.0159339920112802
FLT4	1.08975105152206	0.977808446487576	1.21450920020102	0.120144293574696
FMOD	1.0869505416892	1.01316388141339	1.16611093402805	0.0200939944475722
FN1	1.09056184607082	1.02962066814441	1.15511000983383	0.00312755296568318
FN3K	0.856050871980366	0.779187328564483	0.940496679750226	0.00120358470541646
FNBP1L	1.34155513962204	1.1994351155759	1.50051484175713	2.70535615771712e-07
FNDC3B	1.19733831123573	1.08000499784599	1.32741888640525	0.000620242589054002
FNDC5	0.880053235171852	0.802847856058691	0.96468302293109	0.00638185754993541
FOS	1.0132876103862	0.956207258470347	1.07377534762147	0.655443532828598
FOSL1	1.06806590864313	0.979634588780659	1.16447989716816	0.135346700181605
FOSL2	1.02361753357481	0.943668834089343	1.11033957802888	0.573715132006853
FOXC1	1.04854155468127	0.929007585933126	1.18345577424872	0.442756881670196
FOXD1	1.0808480364193	0.990562314238437	1.1793629346071	0.0806549286003512
FOXD2	1.33105581787244	1.0994412158341	1.61146368243796	0.00336876899134955
FOXD2-AS1	1.29570192304411	1.14721991772151	1.46340160892129	3.02424421797762e-05
FOXD3	1.18280881129835	1.07591362354381	1.30032435083118	0.000512786376431012
FOXJ1	1.10992723467157	1.04572275925332	1.17807368670577	0.000602358049542558
FOXJ3	1.41903535018411	1.21026379781259	1.66382017599106	1.6300419134289e-05
FOXM1	1.20988321080272	1.12617992506347	1.29980774049031	1.9023990355726e-07
FOXO4	0.892225009292968	0.774276031179466	1.02814168997997	0.114948841759492
FPGT	1.20798083192761	1.04407304275523	1.39762031059988	0.0110959308906707
FPR1	0.998291702814175	0.929191158624818	1.07253100145997	0.962738722088554
FPR3	1.05770651962091	0.972293978945186	1.15062224581732	0.19157476740642
FRA10AC1	0.834064982978931	0.748666243881091	0.929204971530859	0.000993851057799204
FREM2	1.20126636595063	1.08290966378303	1.33255887376895	0.000530142482521521
FRMD3	1.1191198402527	1.01071003023496	1.23915779935031	0.0303962115835455
FRMD4B	1.07758839906986	0.970879869913027	1.19602516623808	0.160167638769108
FRMD8	1.34331108067324	1.15937053758257	1.55643480747929	8.56058037788239e-05
FRMPD1	0.753201667396815	0.614662704221275	0.922965958196665	0.00627700282352998
FRMPD2	0.780451061150834	0.676752178283583	0.900039746301677	0.000654841882895353
FRRS1	1.19697778476983	0.970732020922873	1.4759540082652	0.0925555483647172
FRRS1L	0.900084891323648	0.827603865224745	0.978913760110458	0.0139908493629362
FRY	0.97274737047929	0.875545488763173	1.080740474274	0.606966601954956
FRZB	1.02000685052049	0.938688642011232	1.10836962177313	0.640268467057411
FSBP	1.5272262556854	1.27160089618938	1.83423906277861	5.87352888620791e-06
FSD1	0.927311007592122	0.847483709693692	1.01465750310683	0.100353977498864
FSIP1	1.27064610454648	0.937436292640351	1.72229466223426	0.122682683938498
FSTL1	1.14303617179501	1.06223487382114	1.22998380323539	0.000351510868103407
FSTL5	0.784363053502562	0.697435178973429	0.882125562701651	5.0625183783299e-05
FTL	1.06742459134715	0.991692530752532	1.14894004228105	0.0822486523438416
FTSJ2	0.979580951656692	0.868652664012281	1.10467495306624	0.736533035494548
FUCA1	1.05011934907656	0.939574340129192	1.1736704592777	0.388847771230356
FUCA2	1.19282297075163	1.05624588839719	1.3470600502993	0.0044838322808298
FURIN	0.965212100314145	0.824262760206547	1.13026384736754	0.660214698467956
FUT4	1.37629808542716	1.11377316635173	1.70070215118856	0.00309809249542159
FUT9	0.907720546946466	0.81473537219602	1.01131805426333	0.0791126533162389
FXYD2	0.880906636222341	0.790457738696648	0.981705237044128	0.021790577103561
FXYD5	1.01296505725905	0.952893742152508	1.07682332440336	0.679612048031212
FXYD6	0.920608753836218	0.855346839084514	0.990850072640687	0.0274550048696445
FXYD7	0.935517759123261	0.893583867489254	0.979419514470511	0.00438967584081105
FYCO1	1.55539907510622	1.26868588930579	1.90690722048235	2.14524045590971e-05
FZD1	1.10452803830645	0.987720065853137	1.2351497449344	0.0812809275202096
FZD2	1.24361653454149	1.10788771123538	1.39597367973369	0.000217701865431103
FZD4	1.14165420476721	0.954241272760422	1.36587502602173	0.14761452989573
FZD5	1.25098474848975	1.07720475803764	1.45279978507046	0.00334024870715805
FZD6	1.15873906264185	1.03404282118782	1.29847254657186	0.0112051261426862
FZD7	1.11179995998868	1.0288962844001	1.20138362804132	0.00735239548349969
G0S2	0.994916321772502	0.93048297457092	1.06381149830902	0.88140083661131
G3BP1	1.1814303656341	1.05911404198143	1.31787291407359	0.00279058848192729
G6PC	0.968589014089284	0.62247176262507	1.50716021921709	0.887494743329836
G6PC2	0.843121311200082	0.653410120461795	1.08791327703549	0.189493082972652
G6PD	1.05894866376146	0.899332981727479	1.24689330344384	0.492009388927961
GAB3	1.05663989700769	0.888622507950469	1.25642537968514	0.532931347193421
GABARAPL2	0.991529048588782	0.893726267586578	1.10003464131162	0.872443512510551
GABBR1	0.923633226765459	0.835897748406393	1.02057738426927	0.11876385269399
GABBR2	0.979100014227741	0.918709045631653	1.04346075878861	0.515534625617591
GABPB1	1.3450887047244	1.15794054064894	1.56248404824241	0.000105143240788109
GABRA1	0.868488409750619	0.815323813086445	0.925119695714305	1.21493599988338e-05
GABRA3	0.904102654343616	0.82921387835686	0.985754858819905	0.022301598003384
GABRB3	0.84350662948302	0.781317985295275	0.910645150083053	1.32818356575041e-05
GABRD	0.864919848155925	0.814119041076757	0.918890611801251	2.61537991048816e-06
GABRG1	0.852606209420467	0.779041234194418	0.933117935784285	0.000533061794817051
GABRG2	0.850731568882629	0.79531913959518	0.910004759425113	2.54821426981048e-06
GADD45A	1.11251045688333	1.03170018938524	1.19965037266519	0.00558714174624157
GADD45B	0.990885381219163	0.919874948555478	1.06737751718937	0.80929244346885
GAL3ST1	0.976929373602112	0.903751733554898	1.05603227697559	0.556826520694548
GAL3ST4	1.17180722162396	1.042749207854	1.31683836756491	0.00774264222531002
GALE	1.27626514884675	1.10433299617376	1.47496519238707	0.000952392396988711
GALM	1.22799864724053	1.04789047548381	1.43906325413288	0.0111478067537022
GALNS	1.26289894355827	1.06678918304223	1.49505991154905	0.00671092721148201
GALNT1	1.25553387710491	1.10759002408011	1.42323899844376	0.000374494436596339
GALNT10	1.0983935220317	0.978239019762228	1.2333062828903	0.112344213902314
GALNT13	0.938625072237734	0.861788621336465	1.02231220559284	0.146069639448562
GALNT16	0.903527867563165	0.81266143226827	1.00455438765519	0.0606638671710377
GALNT2	1.26611878490891	1.10372803285035	1.45240197746844	0.000753857532734926
GALNT3	1.42315720931464	1.24562386844455	1.62599360347307	2.09401832377499e-07
GALNT5	1.01856778946617	0.867412622942412	1.1960632279234	0.822391372773664
GALNT7	1.19519337533953	1.06723899722984	1.33848857487715	0.00202627729188621
GALNT9	0.900281201736561	0.848737068212293	0.954955630614094	0.000479108568085268
GALNTL6	0.681956547255515	0.562415319936745	0.826906230785053	9.90683493955292e-05
GANAB	1.28020483175705	1.10802099833108	1.479145624246	0.000802855157455826
GAPT	1.05640189814245	0.939509845183518	1.18783744110844	0.359106693260221
GAREML	0.989360204279154	0.891406258477403	1.09807801381518	0.840627687802844
GAS1	1.09030214268456	1.02566769763168	1.15900965301671	0.00555770874604973
GAS2L3	1.26587295719521	1.13691435295191	1.40945915547424	1.70258032899984e-05
GATA4	1.0120024866179	0.884292692088418	1.15815616490293	0.86237759274266
GATA5	0.990804150697538	0.605908979869619	1.62019857380346	0.970629638640486
GATAD1	1.38557340823575	1.24030497288543	1.54785614149703	7.88257208141325e-09
GBE1	1.19254888982895	1.07605882945643	1.32164972369649	0.000785794678853069
GBF1	1.01484320563797	0.842380627821214	1.22261445481406	0.876785559383049
GBGT1	1.0259486408468	0.898835725076541	1.17103780400559	0.704247769917462
GBP1	1.08608089496424	1.01782246572018	1.15891695274351	0.0126535440172752
GBP2	1.0543444738772	0.992994554741449	1.11948475879089	0.0836080907219913
GBP3	1.06162435856677	0.972842191591509	1.15850883981351	0.17957921888615
GBP5	0.984833895357118	0.894077561686846	1.08480275426483	0.756704218133862
GCA	1.17998598902095	1.05462157960705	1.32025264911091	0.00387729448141999
GCH1	1.08458044763819	0.916509934397774	1.28347190057684	0.344595628913621
GCK	1.08169866579523	0.96526490663089	1.21217708791169	0.176520954919773
GCLM	1.18781399840695	1.04510029431656	1.35001597692033	0.00840331671980244
GDAP1	0.825131269610123	0.739635278745325	0.920509921110516	0.000573036032311169
GDAP1L1	0.867277939753971	0.811845834816127	0.926494899064488	2.38404677535984e-05
GDAP2	1.61906438465782	1.30464633979319	2.00925676308793	1.22023852081165e-05
GDF10	0.840010100405282	0.755039847247128	0.934542688515802	0.00135455823366648
GDF15	1.01371634771417	0.948248073470763	1.08370463634234	0.689201306118871
GDI1	0.879690711320562	0.751479245393941	1.02977660704123	0.110737005651774
GDNF-AS1	0.973217384562585	0.864323109623193	1.09583102322435	0.653857155497293
GEM	1.18373113555717	1.09520092736271	1.27941765413005	2.11059212712463e-05
GEMIN6	1.34949167237289	1.13603674252726	1.60305358588354	0.00064529374288517
GEMIN7	1.0093218204889	0.859485599039789	1.18527935599286	0.909898743736003
GEN1	1.50410279196234	1.30818644817128	1.72935991803877	9.87405053638619e-09
GFI1	0.967455270522808	0.707101586459206	1.32367076865038	0.836124192025776
GFRA1	1.01304053212302	0.91710011420198	1.11901754653808	0.798547943416167
GGACT	1.0154410332655	0.886012576966101	1.16377636034251	0.825664289116741
GGCT	1.15670492271259	1.03097327176477	1.29777009246541	0.0131562784659615
GGH	1.07841246328778	0.977463904374582	1.18978658523307	0.132218432712755
GGTA1P	0.874806536994224	0.809495855304977	0.945386529347338	0.000728532012656687
GHITM	0.909246564044972	0.818233700447088	1.01038286955897	0.0770593386816785
GHRHR	0.923036896089571	0.806586311584862	1.05629998836526	0.244451783608391
GIMAP2	1.16773524997975	1.0383169862411	1.31328450956175	0.00967151473375326
GINS1	1.20698603188737	1.08367055769772	1.34433409750123	0.000623244434713051
GINS2	1.22354583051887	1.09952907102938	1.3615505390672	0.000215554170646118
GINS4	1.24465411540613	1.10802415040625	1.39813186060017	0.00022514587431796
GJA3	1.23377037449051	0.987432843400212	1.54156239297126	0.0645052699266038
GJB6	0.877359503145496	0.820190998763803	0.938512735350544	0.000141300921718297
GJC1	1.27144484321599	1.14987676552749	1.40586542645633	2.81945162176921e-06
GJD2	0.699404400972432	0.570401015930001	0.857583528847776	0.000588511986497541
GK	1.15025364022962	1.00738236712832	1.31338752794841	0.0385780203124676
GLA	1.24589819539269	1.09474588174106	1.41792021251003	0.000862988851268061
GLB1	1.28912120546842	1.09515701059144	1.5174385648053	0.00226924763855086
GLB1L	1.36834071703481	1.18576229122527	1.57903176020262	1.7722550939606e-05
GLE1	1.66092401767961	1.39141997756721	1.98262827685446	1.94625115623518e-08
GLI3	1.32606877494163	1.15564454182643	1.52162566622436	5.79377744279083e-05
GLIPR1	1.06276809843666	0.972887583017861	1.16095225262417	0.176922967689763
GLIS3	1.18275360561342	1.08613883255377	1.28796250503481	0.000113190858774788
GLMN	1.22597386257892	1.06935859170251	1.40552656834576	0.00348236613709422
GLP1R	0.763266717815938	0.558453774952129	1.04319481514017	0.0901353274259006
GLRA1	0.537651837269713	0.318698333471692	0.907031721724311	0.0200364488833227
GLRA3	0.727044551395124	0.618120668756738	0.855162764216456	0.000118408677141434
GLRX	1.08744981120791	0.990045705156536	1.19443686865865	0.0799435912112936
GLTSCR1	1.10858989065374	0.952688234262076	1.29000390837366	0.182476122544306
GLUD1	0.961356646480803	0.857147079641864	1.07823572369747	0.500811224527128
GLUD1P2	0.99317233502254	0.845493688428268	1.1666453582732	0.933524367091889
GMEB1	1.40304878933975	1.13180554430918	1.73929692707884	0.00200464523494088
GMIP	1.17036104106521	1.01586163023766	1.34835781337936	0.0294187822016167
GMPPB	1.07423153666126	0.9316751455784	1.23860060004199	0.324267732059307
GMPS	1.21096252911799	1.01542352489193	1.44415626679902	0.0331463991089844
GNAI3	1.55905843750007	1.36136784929449	1.78545659999229	1.37045343769916e-10
GNAL	0.82610449106466	0.737913476094694	0.924835569840744	0.000911394772933114
GNAO1	0.892040804217492	0.816531123168671	0.974533332300935	0.011354007588317
GNAZ	0.856438701141782	0.762403031215891	0.962072839143421	0.00901374634053655
GNG12	1.37594177464748	1.25074513355357	1.51367030454967	5.50209327972714e-11
GNG5	1.34130920500944	1.21365148472311	1.48239458039596	8.68293433770938e-09
GNL2	1.17545994772415	1.05800001423547	1.30596036872657	0.00261603058387452
GNPAT	1.52573629930384	1.31370373318186	1.77199104806923	3.12939330882026e-08
GNPDA1	1.23625785694727	1.0582342653331	1.44422982597598	0.00750763404862998
GNRHR2	0.779845834342873	0.666746260334529	0.912130388308136	0.00186816247984662
GNS	1.10455579518158	0.99628364769741	1.22459452936817	0.0588611529396516
GOLGA2	1.4393059134112	1.2235559604672	1.69309911382348	1.10785439453412e-05
GOLGA3	1.23710057548145	1.00961347695285	1.51584529009611	0.0401457089981049
GOLGA6L2	0.988633064973099	0.830301415875253	1.17715725695565	0.897849900035175
GON4L	1.35232230733187	1.13558055026928	1.6104323224572	0.000707735152664365
GPATCH1	1.41698481075822	1.14856088531817	1.74814063371426	0.00114368159338097
GPBP1L1	1.67899751062842	1.39491540453766	2.02093448213858	4.27179957461616e-08
GPC1	1.16911612121645	1.05745067019833	1.29257330238566	0.00228386074518445
GPC4	1.20945291167315	1.08580963974435	1.34717568532461	0.000547877714180895
GPHN	0.857047803394333	0.771587427379435	0.951973698946548	0.00399826722242816
GPIHBP1	0.938727980835297	0.864446269463789	1.01939270621148	0.132759602617133
GPM6A	0.950083514533297	0.872208125976655	1.0349120326954	0.240591315403053
GPN1	1.39428205230306	1.20258598085984	1.61653509380215	1.06019055870567e-05
GPN2	1.65911912853603	1.29241521113511	2.12986992025305	7.10309988534414e-05
GPNMB	1.07293804722527	1.01548981041181	1.13363624270806	0.0121613461203198
GPR1	1.10667214124421	0.965032134434087	1.26910098068831	0.14690073510365
GPR123	0.920433481181616	0.843283215982644	1.00464206712913	0.0634145405277385
GPR132	0.864926967171307	0.725154809974079	1.03163993157116	0.106616939325518
GPR141	0.912821612901569	0.759863505489037	1.09656970095433	0.329665444803443
GPR156	1.498332597061	1.20478132287691	1.86340917541342	0.000278535702180354
GPR157	0.944432047696551	0.805205012948982	1.10773266233107	0.48231006683232
GPR158	0.871913537091812	0.784218776760215	0.969414707595563	0.0112669073627069
GPR160	1.13184118266353	0.974069562698061	1.31516732667919	0.10588995965286
GPR162	0.882850064102918	0.808807721449665	0.963670616657228	0.00530368519553541
GPR17	0.951912937853271	0.901612431318827	1.00501968448571	0.0752079607669793
GPR171	0.946619592005213	0.752785771972995	1.19036342785748	0.638870182334453
GPR27	0.926393138824093	0.856053086573863	1.00251288281093	0.0577393263866669
GPR3	1.03468112739966	0.89940893112502	1.19029842638756	0.633419118451492
GPR4	1.12485680398133	0.990051678530578	1.27801695295445	0.0708472610591182
GPR6	0.844935430169042	0.715301647702247	0.99806268229389	0.0473915967360557
GPR61	0.775473788395944	0.679693273997598	0.884751430527299	0.000156567033435434
GPR65	1.11702055751772	1.0105250741571	1.23473920422801	0.0304049563119752
GPR82	1.18775614216965	1.00479391978054	1.40403382772248	0.0438002500298426
GPR84	1.01210546125253	0.901771439891942	1.13593912978653	0.838104988847131
GPR98	1.05995762625269	0.975592429388836	1.1516183762876	0.168813695661004
GPRC5A	1.03037814767106	0.916129155974239	1.15887494713452	0.617723925669622
GPRC5B	0.890342569758338	0.807301492211678	0.981925463004135	0.0200669622700103
GPRIN1	0.868235008944863	0.782085717429927	0.963873925782345	0.00804712608748092
GPSM3	1.06890022887267	0.974125455901503	1.17289584453645	0.159557103456596
GPT	0.927634621109522	0.826498208477857	1.04114683063352	0.202183330991973
GPX1P1	1.11666690167196	1.00871270974479	1.23617453933454	0.0334041240730959
GPX7	1.52729049517703	1.34107784812416	1.73935932199675	1.72715508267067e-10
GPX8	1.07948317166096	0.992497236735141	1.17409285866876	0.0743796734121894
GRAMD1A	1.31824906586093	1.12005858294082	1.55150866759175	0.000887571520825544
GRAMD1B	0.772819695036609	0.688663276475695	0.867260243776853	1.18129838044404e-05
GRAP	1.10474261773405	0.975150404570064	1.25155693492838	0.117653706793678
GRB14	1.19733088241485	1.10321255523512	1.29947872255568	1.62116716114076e-05
GRIA1	0.938063879872864	0.870522888311713	1.01084515357055	0.0935358724729832
GRIA2	0.973888561028352	0.911925668011352	1.04006166573882	0.430201772777124
GRIA4	0.935486868613044	0.866441314821127	1.0100345705792	0.0882445222376263
GRID1	0.866408942621825	0.772998879638338	0.971106783759223	0.0137517992137453
GRIK2	1.00307057433882	0.919953158607103	1.09369761676543	0.944615963950029
GRIK4	0.854296976670029	0.738091947337744	0.988797299550528	0.0347736307910554
GRIN1	0.916550398475388	0.881009755874377	0.953524779202533	1.5712558417578e-05
GRIN2B	0.854535957415472	0.745674596970024	0.979290035470166	0.0237615124203394
GRIN2C	0.863782231027954	0.791776454293776	0.942336360968362	0.000976020847275688
GRIN3A	0.70455862798835	0.59361280730161	0.836240145372415	6.18436773691793e-05
GRINA	0.916810635059495	0.819846619764359	1.02524267380621	0.127792658193148
GRIP2	0.935614991406764	0.828141552125176	1.05703597398137	0.285074626399807
GRM4	0.853285495859712	0.735496608668737	0.989938130051235	0.0363140027292451
GRN	1.03899513351526	0.936337548032573	1.15290782660234	0.471095639893673
GRWD1	1.0364861893587	0.908036118888554	1.18310670510141	0.595509619186319
GS1-114I9.1	1.07118145434983	0.979907345790346	1.17095734925586	0.130209857647511
GS1-18A18.1	0.592623033306439	0.419978494155322	0.836238199081306	0.00290252403745598
GS1-600G8.5	1.0703987343084	0.936985857875928	1.22280762380592	0.316509782984008
GS1-72M22.1	0.892172726996211	0.801036287324932	0.993678048536368	0.03795678819229
GSAP	1.17853357143702	1.04407619822757	1.33030652490879	0.00786461629133477
GSC	1.24010453324571	1.12227294226634	1.37030769918679	2.39437386041868e-05
GSG2	1.35061889257619	1.13716390228975	1.60414113507354	0.000616051097255359
GSPT1	1.27291863520018	1.10775272804452	1.46271077544551	0.000666186012897729
GSR	1.05982046677778	0.895087359278238	1.25487128173365	0.500266881806259
GSTK1	1.30578055040779	1.12176600573245	1.51998084904521	0.000576142844101043
GSTO2	0.819028487284019	0.738296001369418	0.908589050649753	0.000162919698798499
GSX2	1.1881418878003	1.08494386825505	1.30115592783256	0.000200342612170829
GTF2B	1.43145893494587	1.21230954288141	1.69022399804437	2.32807508269559e-05
GTF2E1	1.43724133383556	1.19915288141513	1.7226015829172	8.6587398708414e-05
GTF2E2	1.23059862290581	1.03861031008857	1.45807619661365	0.0164975981143123
GTPBP1	0.971853952606804	0.804767527153493	1.17363098451328	0.766762791318341
GTPBP2	1.43726002881525	1.23406616749874	1.67391056074158	3.09637507098003e-06
GTSE1	1.26416894288877	1.15809914802449	1.37995362391089	1.5823291883936e-07
GUCY1A3	0.926485571165299	0.834328237595927	1.02882232063828	0.153174367892077
GUSB	1.17432837098325	1.03241573503093	1.33574787375248	0.0144679281247174
GXYLT1	1.28909188627302	1.10345286295464	1.50596182858719	0.00137031735857419
GYPC	1.1265576118096	1.03468317846572	1.22659001242107	0.00604211566511408
GYS1	1.18350006809463	1.01543204208579	1.37938567341532	0.0310887811188286
GZMA	0.97792097713282	0.898868662082322	1.06392566328987	0.603666018117791
GZMH	0.961858342045934	0.864654810724118	1.06998938615579	0.474345567216184
GZMK	0.952233096236816	0.844351667897992	1.07389835780877	0.424971221445385
H19	1.06160086994155	1.02561168742459	1.09885292930958	0.000680982986513044
H2AFX	1.1919443669413	1.06086105131646	1.33922474778395	0.00313804007808862
H2AFY	1.22547023246018	1.05508101517256	1.42337628016213	0.0077695272111364
H2AFY2	1.03322579153388	0.942826091770194	1.13229316160144	0.484122007653269
H2AFZ	1.11908026929964	1.01214650805607	1.23731163341264	0.0281223929847669
H6PD	1.27988976242266	1.09537678557625	1.49548340399834	0.0018906162141836
HAMP	0.982685512254308	0.931860253175008	1.03628286827805	0.519178023024648
HAND2	1.12237734419393	1.0267752279018	1.22688088739155	0.0110319872863481
HAND2-AS1	1.10167627339629	0.971679946905499	1.24906417512224	0.130656066292628
HAPLN1	0.921547919529985	0.846368820832044	1.00340483615071	0.0598796187833879
HAPLN3	1.05870089481829	0.949783918512224	1.18010798334509	0.30309150947998
HAR1A	0.743749721062307	0.653899176452592	0.845946389749528	6.58322057974832e-06
HAR1B	0.627293904875929	0.502855473035155	0.782526320573588	3.56986543043602e-05
HAS2	1.23887549029597	1.13140554505957	1.35655379024615	3.7173887664919e-06
HAS3	1.09437516503818	0.973485521977627	1.23027715853372	0.131038742331459
HAT1	1.32075985552807	1.16051806138838	1.50312748591574	2.48880896512285e-05
HAUS1	1.27073549751509	1.12357750759061	1.43716716802887	0.000135930258730973
HAUS5	1.28405997279646	1.12561479790974	1.4648084023059	0.00019845213736368
HAUS8	1.17808505030565	1.06144951009775	1.30753688475099	0.00206241054142581
HAVCR2	1.09893387338075	0.994239245880209	1.2146529751946	0.06476711891281
HBEGF	1.04344602477624	0.935542886119119	1.16379443719345	0.445092177746285
HBQ1	0.86207019799395	0.801472257557773	0.927249844597096	6.57737425401786e-05
HCAR2	0.952128748620609	0.806975365386733	1.12339136091892	0.561059066464501
HCCS	1.06884395944862	0.929716594176311	1.22879102815406	0.349414714456634
HCK	1.04397907551742	0.94967036579126	1.14765327989371	0.372951397841211
HCLS1	1.0828273411922	0.987820756029801	1.18697146590226	0.089428457465752
HCP5	1.00657707997034	0.905490075432194	1.11894922474774	0.903371795243775
HDAC1	1.59334679640034	1.35336655074061	1.87588056776632	2.23072313550187e-08
HDAC11	0.863116198591067	0.77254583371715	0.964304692041156	0.00925213770001296
HDAC3	1.27234246147665	1.06741498710827	1.51661290016369	0.00718689630399939
HDAC4	0.91888211814545	0.797581721982144	1.05863051243089	0.241526913959748
HDAC7	1.33312656241608	1.15337385509688	1.54089363441488	9.98677006636938e-05
HDC	1.08012151677069	0.919350750891978	1.26900694850043	0.348588083229034
HDDC2	0.865935100847049	0.774409505012601	0.968277886603143	0.0115515644210137
HDHD3	0.906169258124653	0.809051268384699	1.01494522839032	0.0884772438282571
HEATR2	1.44719706658081	1.26608260620368	1.65422014271252	6.0102087836872e-08
HEATR3	1.33231757461543	1.09981110662385	1.61397726294851	0.00336507631710933
HEBP1	0.953503220462309	0.865592145811739	1.05034269988597	0.334672805831194
HEBP2	1.12416925602155	0.994497168923961	1.27074923456184	0.0612450628664669
HECTD3	1.61217908307514	1.31896490297854	1.97057661658437	3.1159759865326e-06
HECW1	0.813806699659663	0.724132412117853	0.914585969814545	0.00054248347677938
HELLS	1.24093795053113	1.11517151081484	1.38088803572753	7.51563782557577e-05
HELZ2	1.1903643669918	1.07892470600967	1.31331437523971	0.000511460249339559
HERC5	1.17923806141479	1.05168037987718	1.32226713752302	0.00476266656643013
HES1	1.12663137192976	1.01474166094189	1.25085851608593	0.0254713752198944
HES6	1.02001673266206	0.955252483398324	1.08917187130384	0.553746444392925
HESX1	1.42171237403393	1.21367805544611	1.66540547174863	1.30603573492743e-05
HEXB	1.04837946287478	0.946578687921869	1.16112850648538	0.364652488345987
HEXIM1	1.13957329271255	0.936750168450819	1.38631124199462	0.191360647215464
HFE	1.12061004692272	0.970100765987773	1.29447055531958	0.121753201258726
HGD	0.951331278798119	0.798180927377105	1.13386723608353	0.577450452037109
HGF	1.05963410977797	0.954219960349072	1.17669352273264	0.27861177186324
HIAT1	1.151967347483	1.01250857075048	1.31063460399491	0.0316521999314348
HIATL1	1.3685837332127	1.20474313185678	1.55470604918716	1.41362142807627e-06
HIC1	1.05572403576813	0.935143647024744	1.19185244239707	0.380852426491459
HILPDA	1.12513654298001	1.0383049444449	1.21922971389277	0.00401119709869436
HIP1R	0.886794950670851	0.807187311280394	0.974253774242173	0.0122976429955682
HIPK1	1.32785662757167	1.15713451431753	1.52376685819102	5.37883613760824e-05
HIST1H1C	1.14199526832341	1.06783915078034	1.22130115937407	0.000106161508033449
HIST1H2AC	1.20320698942705	1.11860822672354	1.29420383725098	6.5845385436507e-07
HIST1H2AE	1.17752932438704	1.10214211494461	1.25807306606833	1.29185164794641e-06
HIST1H2AG	1.66016649801866	1.38934877210646	1.98377315795573	2.4177212765586e-08
HIST1H2AI	1.11254543849041	1.02676550257555	1.20549175990138	0.00918278428001765
HIST1H2AM	1.08432459668911	1.01697592812439	1.15613339359315	0.0133429124023573
HIST1H2BD	1.18079831669518	1.09502346020791	1.2732920484146	1.56637391829997e-05
HIST1H2BG	1.18145825889367	1.10786976430802	1.25993475269173	3.7356415201855e-07
HIST1H2BH	1.12875043859399	1.04718484541174	1.21666920430382	0.00155222158160096
HIST1H2BJ	1.19113173596183	1.10119383068212	1.28841514807306	1.26284377145979e-05
HIST1H2BK	1.29820714621215	1.17002004604464	1.44043839263586	8.64586592728501e-07
HIST1H3E	1.2107278940858	1.09947516022706	1.33323797257475	0.000100952513969384
HIST1H3H	1.1474193425791	1.07445291300272	1.22534094495152	4.09368949459088e-05
HIST1H4H	1.10709170030368	1.03480255206767	1.18443081767848	0.00314762101021059
HIST1H4I	1.42380776320826	1.24144139423969	1.63296355025577	4.35742525512509e-07
HIST2H2AA3	1.29066052950284	1.16184080680663	1.43376320805522	1.97403764414262e-06
HIST2H2AA4	1.18570571168804	1.09565619306853	1.28315619774141	2.36983111611711e-05
HIST2H2BA	1.14588911513471	1.01676236952939	1.29141469386987	0.0255832477793969
HIST2H2BE	1.44334869875639	1.2945182805397	1.60929011008886	3.86910254065639e-11
HIST2H2BF	1.11531976238275	1.04559233552994	1.18969710286853	0.000921303351445288
HIST2H4B	1.13812756907954	1.06441765267333	1.21694182752947	0.000152255215858507
HIVEP3	1.16942597101833	0.989668382567926	1.38183367861436	0.0660618227801856
HJURP	1.22546171824596	1.12370718653343	1.33643038051501	4.28456480748145e-06
HK2	1.25358013124271	1.14368666975103	1.37403292965598	1.37863772946422e-06
HK3	1.04248063787355	0.966418124408625	1.12452969671513	0.281803986993348
HKR1	1.31441863632562	1.10777481437956	1.5596097050534	0.0017312792861121
HLA-B	1.02477936087308	0.958560035942999	1.09557325477095	0.472646615606864
HLA-DMA	1.05532705958355	0.981642587472448	1.134542466782	0.144774668440914
HLA-DMB	1.04723303608412	0.970095503706358	1.13050419023273	0.237113514372119
HLA-DOA	0.989914609705484	0.91457742773872	1.0714575986543	0.801823284871346
HLA-DOB	1.08658688187169	0.947922551959465	1.24553535456569	0.233198766629814
HLA-DPA1	1.04159462303182	0.977387042106791	1.11002019874361	0.209340575276047
HLA-DPB1	0.999646538907753	0.943392116392544	1.0592554096927	0.990455140043259
HLA-DQA2	1.07198158005652	0.959882743431197	1.19717175440902	0.217419336408628
HLA-DRA	1.05650780872987	0.993311396549912	1.12372490015128	0.0806875137479885
HLA-E	1.02889392180951	0.925799189314891	1.14346903146453	0.596967780861243
HLA-F-AS1	1.03808187993131	0.774982704174322	1.39050069587014	0.802109323803031
HLCS	1.1465098252686	0.98446883690548	1.33522233529434	0.0786415262333048
HLF	0.82935500916423	0.762245152385977	0.902373375642677	1.38589189283302e-05
HLX	1.05089177830928	0.944352368329851	1.16945069102882	0.362741577632293
HM13	1.08556933412554	0.982506024923299	1.1994438194776	0.106701362351064
HMG20B	1.31267377276851	1.16739005691913	1.47603829885427	5.46438071431214e-06
HMGA1	1.1019678982107	0.991950281424825	1.22418761446658	0.070395822835148
HMGA2	1.03899226179882	0.940866187054051	1.1473522323699	0.449820525092507
HMGB2	1.20518114006163	1.11357340504514	1.30432495404411	3.71071142179313e-06
HMGB3P22	0.776539460673341	0.682062791062332	0.884102668969279	0.000132877692794037
HMGCL	1.31855442329413	1.12926694322699	1.53957022971055	0.000469612734642348
HMGCLL1	0.841374271593433	0.753388248335709	0.939635926712697	0.00217834221730924
HMGN2	1.14888179771573	1.04337993634665	1.26505153026443	0.00474230976318679
HMGN2P5	1.18321887780479	1.08378874525862	1.2917710383305	0.000172207690160147
HMGN4	1.29048281251007	1.17175810237163	1.42123693108097	2.23180565466463e-07
HMGXB3	1.22178137135748	1.08206180037359	1.37954201773021	0.00122570181243686
HMMR	1.24479959594937	1.1149910409302	1.3897206140625	9.7345222472345e-05
HMOX1	1.0530915008335	0.992259614839539	1.11765277205914	0.0883807065886485
HMX1	1.04287254894303	0.979982300233451	1.10979877195727	0.185904803838643
HN1L	1.36058098871409	1.19754574365111	1.54581203821599	2.26517673174525e-06
HNRNPA2B1	1.35768185094012	1.18937405438507	1.5498068093685	5.94862381995206e-06
HNRNPAB	1.31041982796294	1.14366241936012	1.50149213303625	9.90474379684799e-05
HNRNPCP1	1.56971635611761	1.27144598166923	1.93795841442531	2.74687914464568e-05
HNRNPD	1.27317582605654	1.13130496192529	1.43283795140094	6.15784815345515e-05
HNRNPH1	1.19613556982679	1.07866051874864	1.326404625493	0.000684827128153973
HNRNPL	1.34275020995909	1.15964491109153	1.55476741983726	8.14525873034112e-05
HNRNPR	1.38887232870184	1.18744674327611	1.62446556559813	3.97299496945487e-05
HNRNPUL1	1.2496094977836	1.09755960077916	1.42272355491442	0.000762036651483627
HOGA1	0.942566817200759	0.824617149226297	1.0773874951807	0.385852977610316
HORMAD2	1.4689575565286	0.917420773249919	2.35206828295205	0.109352453126403
HOTAIRM1	1.13469035699366	1.06960489198845	1.20373627299032	2.75739151718735e-05
HOXA-AS2	1.21405514265605	1.12722630063203	1.30757230254756	3.00524324050098e-07
HOXA-AS3	1.38127790332402	1.14061232440594	1.67272315526216	0.000943336205449625
HOXA1	1.43258295918045	1.16517562075678	1.76136017470161	0.000649221902648556
HOXA10	1.21043916764083	1.12787983165224	1.29904173959091	1.16622034629015e-07
HOXA11	1.28814161437142	1.14608131870696	1.4478107195286	2.16705141960603e-05
HOXA11-AS	1.24531936993537	1.12997676106118	1.37243559918863	9.6843916425808e-06
HOXA13	1.18650030408371	1.01394150331473	1.38842622280327	0.032955382554167
HOXA2	1.29105755754255	1.17581550596923	1.41759451923008	8.55330768145123e-08
[truncated: 3,113 more rows]
