# Supplementary material for: RAB42 Promotes Glioma Pathogenesis via the VEGF Signaling Pathway
Source: Front Oncol. 2021 Nov 29;11:657029. doi: 10.3389/fonc.2021.657029 (PMC8666624; doi:10.3389/fonc.2021.657029)
Supplement: Supplementary Table 3 — Results of ROC curve filtering. [file Table_3.xls]

gene	roc
ABCC3	0.71718333722772
ABRACL	0.707058983670778
AK2	0.720492565553464
ANXA1	0.740432906660473
ARAP3	0.721127995834141
ARPC5	0.700578307055544
AURKA	0.711717060691344
BCAT1	0.736630418248916
CCDC109B	0.729459407010176
CCDC18	0.707910122817054
CCNB1	0.706206761065404
CD276	0.720633875591988
CD58	0.724821238267562
CDC20	0.717674073519118
CDC6	0.714595188130185
CDCA2	0.701449729272121
CDCA8	0.711322602545872
CDKN2C	0.705470502690359
CENPA	0.701484559838732
CENPN	0.704272146030601
CEP112	0.717114576129136
CEP55	0.72451116558576
CFI	0.713750884349178
CHI3L1	0.758577263311172
CHI3L2	0.70390310495831
CHRNA9	0.721062643175929
CNIH4	0.718569726980723
COL4A1	0.725486583772704
COL4A2	0.727698808377113
CRNDE	0.716839402819128
CTD-3049M7.1	0.714533577392008
DCTD	0.709402400961483
DDOST	0.73091046469985
DEPDC1	0.711488675211127
DLGAP5	0.700098806749181
DRAXIN	0.703283897322666
DUSP10	0.704390303313754
ECE1	0.719590953420413
EFNB1	0.718867508781014
EN1	0.72653922102195
F3	0.708663904057183
FAM114A1	0.707297022260554
FBLIM1	0.705525043479515
GAS2L3	0.717527340545183
GJC1	0.719625945229958
GNG12	0.701068802253159
GNG5	0.714215043501762
GPX7	0.716938106436384
H19	0.712988357717949
HIST1H1C	0.70014644736179
HIST1H2BJ	0.723141979568989
HIST1H2BK	0.729007349478344
HIST2H2BE	0.705646222271248
HOTAIRM1	0.715285643651608
HOXA-AS2	0.706238683419763
HOXA-AS3	0.70242452325751
HOXA1	0.702888258962812
HOXA10	0.711911691415648
HOXA2	0.710589902304166
HOXA3	0.71928341798839
HOXA4	0.74140614600114
HOXA5	0.738026882783687
HOXD11	0.70088684150596
IGF2BP2	0.72968180458486
IGF2BP3	0.730934176878129
IGFBP2	0.764555310184618
IKBIP	0.710486391996299
IQGAP1	0.73827627786431
KIF20A	0.706669636790761
KIF23	0.708591512894205
KIF2C	0.705972554416974
KIF4A	0.709985991655719
KLHDC8A	0.711924308534071
KPNA2	0.721989148349064
LAMC1	0.72659447691585
LEPRE1	0.716431867300512
LOXL1	0.746699555976679
MAGOH	0.728124049075905
MED8	0.715195918047609
MELK	0.700020711699073
METTL7B	0.757508510878514
MMP14	0.705736520234948
MRC2	0.722152364435247
MSN	0.728545143495923
NFE2L3	0.712142441029138
NRBP1	0.702211315017646
PBX3	0.702940003072732
PDCL3	0.713291008589967
PDIA4	0.702812380500161
PDPN	0.723368979738449
PHTF1	0.701781098023449
PLAT	0.766025626179013
PLOD1	0.720827668612658
PPIC	0.71471028935002
PSRC1	0.72356760292847
PTTG1	0.7064247471978
PVT1	0.74255721086036
PYGL	0.723363501525074
RAB42	0.726918648472612
RGS16	0.725338497984761
RP1-40E16.9	0.705718234908351
RP11-189B4.6	0.743238269579001
RP11-303E16.2	0.709740705559349
RP11-558F24.4	0.700072090910168
S100A11	0.721862692106751
SERPINA3	0.72884705262237
SERPINH1	0.733798745813314
SHCBP1	0.716768127312994
SLC39A1	0.704004170669883
SMC4	0.712013972317197
STK40	0.74245225832964
TACC3	0.708159685986116
TAF12	0.724628984026857
TAGLN2	0.758518717133736
TBC1D1	0.710754546650023
TEAD3	0.712064947119617
TGFB2	0.708124054518895
TGIF1	0.706377837870485
TK1	0.707789535823146
TMEM2	0.712577797658384
TMEM71	0.702827207580327
TMSB4X	0.716916443049226
TNFRSF12A	0.7504884495631
TUBA1C	0.719147652848304
TUBB6	0.733199934067435
TXLNA	0.710084263557368
TXNDC12	0.704540817036043
VIM	0.737137994163066
VMP1	0.717080477315472
WDR1	0.702873396456184
WDR77	0.710254657576827
