# Supplementary material for: RAB42 Promotes Glioma Pathogenesis via the VEGF Signaling Pathway
Source: Front Oncol. 2021 Nov 29;11:657029. doi: 10.3389/fonc.2021.657029 (PMC8666624; doi:10.3389/fonc.2021.657029)
Supplement: Supplementary Table 4 — Results of clinical relevance analysis filtering. [file Table_4.xls]

id	PRS_type	Histology	Grade	Gender	Age	Radio_status	Chemo_status	IDH_mutation_status	1p19q_codeletion_status	SigNum
HIST1H2BK	8.54E-05	1.11E-46	3.00E-44	0.022478608	0.001200878	0.982780949	8.55E-07	4.88E-32	6.95E-54	8
MED8	0.000828539	1.71E-44	6.71E-46	0.019956758	3.36E-06	0.842074121	6.27E-08	8.20E-39	1.59E-60	8
ABCC3	0.00128387	3.25E-43	1.01E-44	0.175306215	1.90E-07	0.454798269	5.47E-06	1.73E-53	4.91E-31	7
ABRACL	3.30E-05	9.10E-37	3.22E-39	0.352839644	2.83E-05	0.317497629	2.90E-10	4.33E-54	8.87E-27	7
AK2	8.25E-05	4.02E-51	8.39E-53	0.114662631	1.25E-05	0.969011101	2.61E-08	1.78E-29	6.73E-50	7
ANXA1	1.13E-05	4.54E-53	1.62E-51	0.172479171	1.16E-07	0.448109854	6.94E-09	1.93E-57	1.88E-38	7
AURKA	3.10E-07	4.21E-48	2.22E-54	0.532410219	0.007690539	0.827352827	6.74E-10	2.04E-21	5.45E-14	7
BCAT1	0.021745866	4.00E-40	2.76E-46	0.412516996	1.89E-07	0.400453225	2.03E-05	1.44E-74	1.73E-31	7
CCDC109B	3.91E-05	1.67E-50	6.78E-49	0.408051421	3.75E-09	0.346821443	1.01E-07	1.61E-68	6.14E-36	7
CCNB1	1.92E-08	2.57E-49	2.27E-54	0.932713273	0.00249546	0.426924465	3.26E-11	2.57E-24	4.67E-19	7
CD276	0.004390902	7.53E-45	3.40E-50	0.312371228	1.13E-06	0.688266764	3.82E-06	2.40E-34	6.93E-26	7
CD58	0.008198135	3.35E-50	6.92E-46	0.278234727	6.30E-07	0.155304656	1.15E-06	1.11E-69	3.10E-50	7
CDC20	2.53E-05	2.06E-49	3.57E-55	0.143872994	0.001537691	0.665499512	5.10E-08	1.46E-24	1.09E-28	7
CDC6	2.13E-05	9.46E-45	2.30E-50	0.731186095	0.013720953	0.27982031	5.85E-10	2.36E-22	5.61E-23	7
CDCA2	1.21E-05	3.45E-43	2.60E-49	0.492437203	0.002411078	0.154375235	1.80E-09	3.24E-19	4.19E-16	7
CDCA8	1.14E-05	1.74E-46	7.92E-50	0.610502997	0.046965874	0.431165703	1.13E-10	1.19E-19	2.47E-30	7
CDKN2C	6.20E-06	1.60E-34	1.44E-40	0.811493581	0.043524762	0.532278952	1.12E-09	1.59E-22	1.05E-14	7
CENPA	2.23E-06	7.61E-45	4.68E-51	0.634100254	0.020028389	0.561452035	2.42E-10	9.52E-18	1.21E-17	7
CENPN	1.55E-09	1.33E-42	9.29E-47	0.556812469	0.002582079	0.402493105	1.63E-08	1.63E-19	2.73E-11	7
CEP112	0.037802815	6.74E-38	3.92E-39	0.506570784	3.56E-10	0.44309527	4.19E-06	2.42E-76	7.41E-38	7
CEP55	2.46E-07	1.44E-48	5.46E-54	0.442444402	0.011822931	0.179598823	6.15E-11	6.03E-23	8.26E-17	7
CFI	0.000149775	2.14E-32	3.38E-34	0.394679804	0.000150061	0.255323152	1.62E-06	9.31E-32	3.04E-24	7
CHI3L1	1.52E-05	1.37E-53	7.22E-54	0.511035255	1.21E-13	0.43986089	1.77E-06	2.17E-67	9.52E-36	7
CHI3L2	0.000134525	1.83E-35	3.63E-35	0.101436364	6.62E-08	0.54458	4.25E-06	1.76E-32	1.87E-26	7
CHRNA9	2.98E-08	7.60E-41	6.18E-39	0.580527622	2.83E-05	0.80217752	4.49E-06	1.73E-28	2.53E-26	7
CNIH4	1.51E-09	7.75E-51	1.67E-55	0.223089806	9.42E-06	0.765479049	7.90E-12	3.18E-29	8.28E-20	7
COL4A1	3.48E-08	1.19E-52	5.95E-55	0.817139421	0.000119535	0.384608509	5.01E-09	8.22E-35	1.35E-18	7
COL4A2	1.32E-08	3.61E-54	2.64E-56	0.564160507	1.41E-05	0.976076311	3.21E-09	1.73E-39	8.96E-20	7
CRNDE	0.000807733	5.57E-34	3.62E-33	0.111464009	0.000140718	0.238905588	2.14E-08	2.72E-30	7.81E-39	7
DDOST	2.35E-05	2.26E-51	4.07E-50	0.345182278	0.000159228	0.677760593	1.08E-07	6.67E-37	3.07E-56	7
DEPDC1	0.000105983	2.06E-46	1.27E-50	0.562972678	0.005722483	0.505037043	9.17E-11	1.70E-25	2.29E-26	7
ECE1	0.002350562	6.01E-44	3.73E-45	0.749222721	1.13E-06	0.78619211	1.85E-05	1.70E-53	1.54E-31	7
EFNB1	1.12E-05	1.75E-37	5.11E-42	0.345888395	0.014175689	0.511314887	7.19E-07	1.67E-39	6.59E-27	7
EN1	4.47E-06	4.59E-40	2.72E-45	0.42857302	3.36E-11	0.825369179	7.76E-09	4.92E-35	4.65E-20	7
FAM114A1	0.008315873	1.72E-38	9.19E-40	0.308356402	1.81E-05	0.318157937	5.31E-06	2.18E-56	1.59E-30	7
FBLIM1	2.74E-07	1.43E-39	4.64E-41	0.198749336	0.008536022	0.583400458	3.60E-07	6.07E-27	1.48E-21	7
GAS2L3	0.000362263	2.97E-38	5.25E-43	0.667776466	0.015852934	0.221607627	2.72E-08	5.94E-37	1.25E-31	7
GJC1	0.004111199	1.63E-46	1.30E-50	0.758914302	2.22E-05	0.518205018	1.30E-07	8.29E-34	1.18E-30	7
GNG5	0.000729994	9.19E-51	1.14E-44	0.164432963	0.000257341	0.818867179	1.55E-06	1.03E-32	1.70E-52	7
GPX7	0.001463802	2.78E-50	2.96E-52	0.438737486	0.004316811	0.945300194	4.50E-09	2.33E-27	4.19E-46	7
H19	0.000463866	6.84E-30	1.52E-34	0.252187693	7.31E-08	0.230407026	1.77E-05	4.75E-43	1.74E-17	7
HIST1H1C	0.001342931	1.62E-30	9.11E-36	0.082269521	3.59E-07	0.457820823	0.001129461	6.32E-26	6.27E-18	7
HIST1H2BJ	0.028401077	1.29E-35	9.65E-39	0.175369814	8.92E-08	0.273885882	0.001430573	5.70E-29	9.59E-35	7
HOTAIRM1	0.010121459	3.53E-34	1.03E-37	0.162200785	3.09E-12	0.377809771	1.08E-07	4.74E-39	2.90E-27	7
HOXA-AS2	0.001945715	5.46E-30	5.44E-33	0.447214558	4.64E-08	0.896477815	1.48E-07	1.76E-34	7.58E-25	7
HOXA-AS3	6.86E-06	1.12E-27	2.76E-30	0.557891294	1.27E-08	0.931370363	3.68E-07	3.66E-31	1.29E-24	7
HOXA1	0.000289291	2.58E-30	9.03E-31	0.179301876	1.66E-11	0.227097745	2.92E-07	4.74E-43	3.06E-27	7
HOXA10	6.78E-07	2.02E-40	1.25E-41	0.156746266	3.55E-05	0.529747013	2.68E-09	3.65E-22	2.22E-36	7
HOXA2	0.000392772	1.62E-25	6.06E-29	0.551501919	5.66E-08	0.793118818	2.04E-08	8.04E-32	3.80E-24	7
HOXA3	0.000138282	2.89E-29	1.22E-33	0.491301814	1.11E-08	0.84194744	2.49E-07	1.76E-33	6.03E-26	7
HOXA4	2.08E-05	4.72E-31	4.91E-34	0.118578286	8.08E-06	0.915979386	2.97E-06	3.46E-31	9.81E-32	7
HOXA5	3.00E-06	2.10E-35	1.37E-38	0.548427666	5.30E-10	0.630996246	4.14E-08	3.70E-36	3.77E-30	7
HOXD11	0.001726231	4.78E-38	6.47E-42	0.49175307	4.19E-12	0.992854069	1.14E-05	9.90E-39	1.04E-21	7
IGF2BP2	0.00068887	1.16E-34	5.12E-39	0.839153303	0.008412048	0.85114429	5.22E-05	9.00E-49	4.64E-32	7
IGFBP2	5.68E-07	5.90E-63	1.38E-68	0.06358366	1.86E-10	0.484380384	3.39E-08	5.88E-70	2.33E-32	7
IKBIP	1.70E-06	9.65E-50	8.28E-53	0.638899487	2.06E-05	0.253618398	4.78E-11	1.43E-38	9.85E-17	7
IQGAP1	0.003269264	6.55E-44	7.53E-44	0.227986106	7.15E-06	0.397532546	1.85E-06	8.48E-61	6.07E-48	7
KIF20A	2.31E-06	2.08E-45	6.01E-51	0.836184146	0.040017275	0.243555637	5.59E-11	1.07E-17	7.53E-14	7
KIF23	4.29E-05	3.77E-39	5.91E-46	0.900269831	0.033254033	0.335413837	6.87E-10	7.67E-22	6.71E-17	7
KIF2C	4.96E-05	1.69E-47	3.48E-51	0.539910714	0.019080681	0.434231428	1.44E-09	2.93E-19	2.07E-33	7
KIF4A	4.45E-06	2.47E-44	6.74E-51	0.88199294	0.019412445	0.170496183	1.18E-10	7.60E-21	1.83E-14	7
KLHDC8A	0.017782302	1.67E-28	1.08E-34	0.59183061	0.004744956	0.323584857	2.32E-05	6.24E-33	3.44E-14	7
KPNA2	4.32E-08	9.73E-50	2.10E-53	0.610742338	2.62E-05	0.765305684	4.67E-11	3.43E-26	8.84E-22	7
LAMC1	9.74E-06	2.04E-43	2.47E-48	0.211022609	0.000427853	0.275798658	6.86E-08	2.81E-41	1.11E-17	7
LEPRE1	0.002910965	5.50E-46	1.26E-50	0.233172326	1.25E-06	0.483387198	9.86E-08	5.23E-37	2.03E-36	7
LOXL1	0.000749846	1.96E-39	4.79E-45	0.556526322	4.72E-09	0.527368049	3.06E-05	2.95E-67	3.29E-15	7
MAGOH	6.70E-07	1.08E-46	2.57E-45	0.108979402	0.000332943	0.534219727	6.11E-12	4.33E-28	6.25E-55	7
MELK	2.42E-06	2.16E-41	8.90E-47	0.745099323	0.030327417	0.245860383	1.08E-10	3.09E-16	3.11E-13	7
METTL7B	6.78E-07	8.42E-54	1.34E-55	0.655868395	8.39E-11	0.440129663	8.25E-06	5.89E-59	9.13E-25	7
MMP14	0.028917651	2.02E-41	5.59E-45	0.336150694	0.000258534	0.495664531	3.75E-06	1.46E-48	2.61E-30	7
NFE2L3	0.047780536	2.83E-29	1.38E-32	0.233870234	0.000124332	0.112024051	8.01E-07	1.40E-39	7.99E-31	7
NRBP1	0.000117021	7.45E-43	1.17E-44	0.603898693	7.67E-05	0.835149901	4.30E-08	5.42E-30	7.27E-28	7
PDCL3	5.75E-09	1.96E-41	8.65E-46	0.868803763	1.75E-05	0.08141961	3.54E-11	1.41E-21	1.92E-13	7
PDIA4	0.00578441	1.69E-40	5.45E-45	0.553446703	1.61E-05	0.488791617	1.10E-06	5.76E-40	9.36E-19	7
PHTF1	0.010834684	4.62E-40	9.90E-36	0.202180263	0.000341702	0.140304649	1.60E-09	1.63E-40	4.97E-63	7
PLAT	1.07E-05	7.81E-51	1.40E-53	0.738382955	6.61E-08	0.597041911	5.28E-07	7.22E-68	1.01E-35	7
PLOD1	0.00042963	1.05E-52	8.92E-53	0.265427375	1.72E-05	0.749751218	2.29E-07	7.08E-40	7.03E-41	7
PPIC	0.006543655	4.53E-37	6.69E-41	0.202468585	4.22E-10	0.362049609	2.81E-06	2.44E-54	2.98E-17	7
PSRC1	0.038040928	1.90E-40	3.42E-45	0.153316968	3.37E-06	0.82859251	2.86E-07	6.70E-60	1.59E-40	7
PTTG1	2.48E-07	4.40E-50	8.24E-57	0.327255469	0.00014894	0.92596825	5.69E-10	1.31E-22	5.23E-16	7
PVT1	0.001117672	1.40E-40	1.79E-44	0.079628335	9.49E-09	0.799149909	4.48E-07	8.59E-57	1.94E-38	7
PYGL	0.002763137	5.35E-49	6.70E-46	0.162857269	5.64E-06	0.568210938	1.18E-06	1.61E-58	2.12E-48	7
RAB42	0.00444347	8.77E-43	5.08E-47	0.123187093	2.90E-06	0.544427087	1.72E-05	1.21E-47	1.86E-20	7
RGS16	0.003146175	2.51E-39	5.65E-44	0.4254668	4.17E-06	0.703211205	5.62E-07	2.05E-45	1.45E-37	7
RP1-40E16.9	8.26E-07	9.50E-20	1.80E-21	0.849626747	0.000315354	0.849528353	3.10E-06	4.00E-35	9.00E-12	7
RP11-189B4.6	0.000134554	8.10E-38	6.51E-42	0.773675692	9.94E-07	0.373322638	2.63E-06	4.38E-46	1.13E-23	7
RP11-303E16.2	0.044386908	4.77E-39	1.29E-45	0.239446114	9.44E-06	0.77346636	2.67E-10	8.66E-30	1.86E-18	7
RP11-558F24.4	0.005308143	7.74E-36	1.56E-41	0.186994075	0.001617482	0.568476228	1.90E-08	4.89E-39	1.12E-18	7
S100A11	0.010197855	6.61E-47	2.62E-47	0.12309829	1.92E-08	0.406977489	1.23E-06	6.38E-54	1.74E-35	7
SERPINA3	1.38E-06	2.29E-32	6.13E-34	0.122344405	4.02E-08	0.812868969	6.17E-05	1.53E-36	1.25E-20	7
SERPINH1	1.75E-05	3.14E-55	1.26E-58	0.413286818	1.25E-05	0.861132854	1.80E-08	1.96E-47	4.75E-24	7
SHCBP1	0.000298022	8.37E-45	3.87E-51	0.495230282	5.16E-05	0.431299565	1.51E-11	1.57E-33	3.44E-21	7
SLC39A1	0.000500891	1.40E-42	7.22E-43	0.293414885	0.00135331	0.820456723	2.59E-06	5.90E-29	1.02E-40	7
STK40	0.000121699	3.10E-51	2.88E-48	0.091812531	0.000108474	0.956698403	1.45E-05	3.63E-41	1.23E-62	7
TACC3	5.25E-06	8.31E-48	1.20E-54	0.268996745	0.000106159	0.921998474	5.81E-10	4.58E-25	1.40E-15	7
TAF12	0.008001049	8.53E-46	1.53E-44	0.285669424	0.000235945	0.812340082	5.83E-10	1.26E-32	4.42E-51	7
TAGLN2	0.000933298	1.46E-53	2.38E-57	0.113859611	9.63E-12	0.874361776	6.19E-08	6.08E-82	1.85E-28	7
TBC1D1	0.778388424	8.70E-37	2.29E-38	0.045114688	1.05E-10	0.668804782	9.32E-06	2.08E-64	8.35E-36	7
TGIF1	0.008159711	8.70E-51	6.94E-49	0.225127798	0.001504855	0.78706583	7.97E-08	1.14E-42	9.60E-46	7
TK1	5.43E-06	3.60E-50	1.51E-56	0.296164701	1.78E-05	0.911362109	5.35E-08	5.34E-25	1.73E-12	7
TMEM2	8.54E-05	1.40E-31	2.20E-33	0.552192075	0.000143638	0.909200666	2.19E-08	5.27E-37	3.28E-19	7
TMEM71	0.008052059	9.21E-39	4.57E-40	0.301111182	9.72E-08	0.058217554	1.77E-06	3.32E-43	2.78E-35	7
TMSB4X	0.00112794	3.91E-48	2.72E-46	0.253129193	7.47E-08	0.836391833	1.67E-07	4.72E-54	3.66E-39	7
TNFRSF12A	6.76E-06	2.00E-55	1.68E-55	0.106500969	1.01E-07	0.582153705	8.10E-09	1.13E-50	5.06E-36	7
TUBA1C	0.049150198	2.19E-44	3.66E-49	0.177839884	7.16E-10	0.258277515	8.54E-06	4.43E-52	9.65E-12	7
TUBB6	0.000115743	1.85E-48	1.16E-50	0.091775583	0.000149245	0.596096634	4.32E-07	1.67E-44	1.56E-36	7
TXLNA	0.019240683	1.25E-46	1.85E-45	0.230479727	0.001269719	0.333254051	5.40E-06	2.37E-35	2.39E-65	7
VIM	2.52E-06	3.29E-54	2.10E-47	0.319733055	0.000445423	0.869530749	2.10E-07	1.32E-44	1.76E-53	7
VMP1	1.97E-07	3.78E-41	2.18E-44	0.450669135	0.001702169	0.472536422	1.06E-08	1.24E-33	1.28E-20	7
WDR1	7.38E-05	1.60E-36	5.44E-38	0.089358637	3.27E-05	0.713521636	1.60E-06	7.63E-31	1.10E-25	7
WDR77	0.013971112	4.50E-37	1.17E-33	0.512449917	0.025666735	0.364327918	3.39E-07	4.88E-20	8.70E-58	7
ARAP3	0.158806949	1.18E-43	4.27E-46	0.463441498	3.10E-08	0.397912501	7.86E-10	7.35E-65	1.82E-20	6
ARPC5	1.02E-06	1.80E-35	1.20E-38	0.275754696	0.07270094	0.581374958	6.23E-10	1.01E-24	1.84E-26	6
CCDC18	0.018494245	1.53E-38	2.39E-37	0.459790859	0.06041215	0.372917775	1.08E-08	2.52E-22	3.03E-43	6
CTD-3049M7.1	0.403505384	2.00E-34	1.58E-39	0.199645754	9.56E-11	0.57098018	2.13E-08	5.24E-62	3.31E-16	6
DCTD	0.084277	3.12E-37	6.18E-35	0.53039583	7.52E-06	0.916047511	3.94E-05	2.96E-73	4.62E-53	6
DLGAP5	1.17E-05	1.89E-43	1.70E-48	0.702607814	0.056461643	0.502004911	3.83E-09	3.14E-17	1.71E-19	6
DRAXIN	0.000326397	7.18E-28	1.52E-30	0.934007212	0.093198941	0.235388918	7.00E-06	3.58E-21	5.45E-31	6
DUSP10	5.76E-05	6.18E-32	3.08E-33	0.504490359	0.05471043	0.769643131	7.43E-06	2.64E-32	5.76E-35	6
F3	0.511179868	9.41E-31	5.79E-31	0.356171517	2.04E-10	0.21717773	4.20E-06	5.32E-66	2.99E-23	6
GNG12	0.202719443	1.40E-37	6.22E-32	0.617031658	0.008400803	0.31881924	7.30E-07	2.23E-44	1.36E-55	6
IGF2BP3	1.99E-05	2.17E-34	7.12E-37	0.815860533	0.070637523	0.595895672	1.10E-05	1.38E-28	1.97E-32	6
MRC2	0.334966941	1.06E-42	1.12E-45	0.197087681	8.48E-10	0.36360785	0.001037598	2.05E-54	2.67E-29	6
MSN	0.17186671	4.92E-44	7.72E-45	0.190696085	1.18E-07	0.095227423	6.68E-07	3.91E-78	3.57E-39	6
PBX3	0.000274098	1.05E-17	3.09E-21	0.85610343	0.832317634	0.972634	1.65E-06	1.86E-16	7.82E-17	6
PDPN	0.415269443	2.64E-50	7.42E-48	0.076204978	3.90E-11	0.366494199	2.42E-06	4.30E-72	2.13E-46	6
SMC4	2.43E-05	3.22E-36	2.76E-41	0.972791903	0.052094041	0.813045146	6.21E-11	1.86E-24	1.14E-16	6
TEAD3	0.079883339	9.77E-38	2.67E-41	0.59233552	3.38E-09	0.994562007	1.15E-05	2.54E-62	8.57E-18	6
TGFB2	0.079133082	5.59E-36	6.08E-33	0.151202162	2.64E-06	0.873287723	0.000153557	1.95E-45	7.81E-40	6
TXNDC12	0.076685997	6.67E-43	9.11E-43	0.156098742	0.000379696	0.991480601	2.46E-05	9.11E-28	4.06E-48	6
HIST2H2BE	0.223878544	2.28E-12	2.13E-14	0.933727981	0.100175878	0.595938922	0.009292951	1.11E-15	5.02E-20	5
