# Supplementary material for: RAB42 Promotes Glioma Pathogenesis via the VEGF Signaling Pathway
Source: Front Oncol. 2021 Nov 29;11:657029. doi: 10.3389/fonc.2021.657029 (PMC8666624; doi:10.3389/fonc.2021.657029)
Supplement: Supplementary Table 5 — Primers used in the experiments [file Table_5.xlsx]

## Sheet: Sheet1
Genes	Primer Sequences
RAB42	Forward	GTTGGCCACAAGAGTGACCT
	Reverse	ATAGCATCAGCGAGGGTGTC
GAPDH	Forward	CCAGGTGGTCTCCTCTGA
	Reverse	GCTGTAGCCAAATCGTTGT
