# Supplementary material for: RAB42 Promotes Glioma Pathogenesis via the VEGF Signaling Pathway
Source: Front Oncol. 2021 Nov 29;11:657029. doi: 10.3389/fonc.2021.657029 (PMC8666624; doi:10.3389/fonc.2021.657029)
Supplement: Supplementary Table 6 — The differential gene expression of SNB19-WT vs SNB19-RAB42 [file Table_6.xls]

gene_id	A3.1_counts	A3.2_counts	A3.3_counts	A1.1_counts	A1.2_counts	A1.3_counts	A3.1_tpm	A3.2_tpm	A3.3_tpm	A1.1_tpm	A1.2_tpm	A1.3_tpm	ENSEMBL	log2FoldChange	stat	pvalue	padj	SYMBOL
ENSG00000000971.16_4	2522	1922	2553	894	921	1411	10.28019	18.635801	14.443812	5.436096	5.646322	8.882798	ENSG00000000971	-1.42634998	down	1.31E-12	3.40E-11	CFH
ENSG00000001561.7_4	222	121	203	91	67	128	0.479366	0.5634	0.587983	0.237802	0.172399	0.350264	ENSG00000001561	-1.187846261	down	0.001450684	0.007796767	ENPP4
ENSG00000001617.12_6	376	127	351	23	49	62	1.055307	0.791024	1.309541	0.074489	0.176759	0.211492	ENSG00000001617	-2.902197696	down	4.00E-13	1.11E-11	SEMA3F
ENSG00000001629.10_5	986	718	1059	353	496	520	1.674403	2.804883	2.888624	0.752401	1.11163	1.038738	ENSG00000001629	-1.315064745	down	2.08E-10	4.16E-09	ANKIB1
ENSG00000002549.12_4	9819	5022	7178	2543	3503	3071	51.67432	55.980488	50.263988	15.480874	21.38615	19.280384	ENSG00000002549	-1.534244425	down	1.36E-22	8.73E-21	LAP3
ENSG00000002587.10_7	278	99	162	4	24	37	0.968956	0.387394	0.302785	0.006819	0.039756	0.064074	ENSG00000002587	-3.324233742	down	1.72E-09	3.02E-08	HS3ST1
ENSG00000002726.20_7	59	41	64	4	27	7	0.188791	0.283429	0.321889	0.013653	0.100956	0.027354	ENSG00000002726	-2.433898915	down	0.001554066	0.008254666	AOC1
ENSG00000003249.14_4	578	222	296	114	119	89	2.475807	1.836208	1.894185	0.477573	0.698839	0.389697	ENSG00000003249	-1.981153153	down	2.19E-09	3.75E-08	DBNDD1
ENSG00000003400.15_6	41	3	30	0	0	5	0.137132	0.010557	0.067901	0	0	0.008745	ENSG00000003400	-4.052366871	down	0.005882034	0.025593625	CASP10
ENSG00000003989.18_7	4	4	55	118	89	178	0.005251	0.011372	0.096232	0.187796	0.140671	0.296105	ENSG00000003989	2.417512132	up	0.001499822	0.008018868	SLC7A2
ENSG00000004399.12_7	897	677	901	210	210	283	1.697731	4.218952	2.695889	0.535631	0.666664	0.952741	ENSG00000004399	-2.116929525	down	2.43E-20	1.30E-18	PLXND1
ENSG00000004455.17_5	16285	7702	11900	36478	34288	29785	118.382668	127.50605	99.73481	357.69046	284.151459	235.168808	ENSG00000004455	1.259244501	up	1.34E-12	3.48E-11	AK2
ENSG00000004478.8_4	456	186	487	1412	1310	2071	1.465379	1.271492	1.786954	4.651525	4.279599	7.216786	ENSG00000004478	1.865137359	up	1.17E-14	3.87E-13	FKBP4
ENSG00000004799.8_5	130	136	190	60	61	118	0.413341	0.937028	0.741492	0.219461	0.201152	0.409392	ENSG00000004799	-1.271967951	down	0.00274279	0.01343785	PDK4
ENSG00000004838.14_6	124	43	47	33	15	8	0.698091	0.659526	0.361526	0.212134	0.098232	0.057224	ENSG00000004838	-2.084898563	down	0.003101332	0.014918877	ZMYND10
ENSG00000005075.15_3	6732	3207	4631	12818	12563	10891	72.74247	74.771202	66.954994	167.915573	163.467697	148.569824	ENSG00000005075	1.082803429	up	1.46E-09	2.57E-08	POLR2J
ENSG00000005100.13_8	565	245	514	1163	1281	1264	1.026334	0.957869	1.246974	2.562499	2.80383	2.90255	ENSG00000005100	1.25981918	up	7.74E-10	1.43E-08	DHX33
ENSG00000005108.16_7	341	126	291	69	79	97	0.321576	0.255749	0.366954	0.078063	0.089082	0.115014	ENSG00000005108	-1.846919717	down	7.70E-08	1.06E-06	THSD7A
ENSG00000005194.15_7	6214	2754	5054	11243	13352	11555	35.204845	30.669167	37.217686	75.979988	89.529091	88.029709	ENSG00000005194	1.136757757	up	1.39E-12	3.60E-11	CIAPIN1
ENSG00000005483.21_8	10689	6226	10100	4452	4875	4873	47.083355	68.169632	59.940285	30.34593	27.516022	28.598938	ENSG00000005483	-1.188814628	down	2.68E-17	1.08E-15	KMT2E
ENSG00000005889.15_4	1013	534	733	202	475	400	2.906439	2.593854	2.963624	0.911114	1.211195	1.050473	ENSG00000005889	-1.373497842	down	2.00E-07	2.57E-06	ZFX
ENSG00000006015.17_5	199	192	250	691	589	1014	1.372107	3.629791	3.335033	9.781823	8.522626	14.4881	ENSG00000006015	1.517057037	up	6.45E-08	8.97E-07	REX1BD
ENSG00000006210.7_5	936	455	893	214	143	174	1.623819	1.701129	3.653455	0.448658	0.298271	0.380706	ENSG00000006210	-2.319712526	down	2.23E-18	9.92E-17	CX3CL1
ENSG00000006327.14_3	45231	13344	22108	75788	92526	56624	466.40921	297.434906	304.490051	950.423706	1151.011719	739.492432	ENSG00000006327	1.298046622	up	1.27E-07	1.69E-06	TNFRSF12A
ENSG00000006451.8_5	4988	2249	3854	11566	11917	10267	18.605967	18.779175	21.978348	51.694256	55.292664	48.654194	ENSG00000006451	1.380884585	up	9.37E-16	3.39E-14	RALA
ENSG00000006459.11_5	53	22	52	95	123	131	0.061172	0.050808	0.074092	0.124985	0.16097	0.179974	ENSG00000006459	1.223738907	up	0.008190381	0.033710808	KDM7A
ENSG00000006468.14_7	776	526	816	215	185	176	1.766899	1.993564	2.444383	1.324849	1.249797	0.381703	ENSG00000006468	-2.141479094	down	2.95E-18	1.31E-16	ETV1
ENSG00000006704.10_6	260	160	329	600	994	828	0.586755	0.678907	1.166326	1.855763	2.881597	2.96897	ENSG00000006704	1.420086297	up	7.32E-09	1.17E-07	GTF2IRD1
ENSG00000006744.19_7	720	669	922	1966	2712	3129	1.998979	4.609382	3.414797	6.831951	9.332698	11.199191	ENSG00000006744	1.425670851	up	1.04E-11	2.45E-10	ELAC2
ENSG00000006757.12_6	66	66	121	250	198	252	0.196525	0.425017	0.911862	1.52614	0.715328	1.514476	ENSG00000006757	1.183041903	up	0.002088568	0.010645791	PNPLA4
ENSG00000007376.8_6	62	16	41	98	252	275	0.287929	0.159178	0.25064	0.551838	1.409794	1.617829	ENSG00000007376	2.161821932	up	5.17E-06	5.10E-05	RPUSD1
ENSG00000007545.16_5	64	26	39	99	121	130	0.080236	0.06864	0.064457	0.150998	0.183853	0.206478	ENSG00000007545	1.199423874	up	0.009415926	0.037822922	CRAMP1
ENSG00000007968.7_5	189	131	301	63	112	74	0.363554	0.544724	0.778924	0.146516	0.26026	0.179946	ENSG00000007968	-1.591052435	down	3.19E-05	0.00026238	E2F2
ENSG00000008086.13_6	651	431	542	109	160	186	0.725971	0.745625	0.777952	0.12437	0.13157	0.219963	ENSG00000008086	-2.140321982	down	9.54E-17	3.75E-15	CDKL5
ENSG00000008300.17_6	432	240	231	145	142	220	0.368812	0.529434	0.259501	0.148268	0.143573	0.233642	ENSG00000008300	-1.117963231	down	0.000556442	0.003387008	CELSR3
ENSG00000008323.15_3	3	23	15	0	0	0	0.007805	0.215473	0.134521	0	0	0	ENSG00000008323	-6.729452709	down	0.000406569	0.002584718	PLEKHG6
ENSG00000008382.15_6	53	20	79	129	153	186	0.338848	0.26127	0.674419	0.9815	1.292743	1.532798	ENSG00000008382	1.408405988	up	0.002091693	0.010654817	MPND
ENSG00000008441.16_6	1482	548	1087	293	447	527	8.163142	7.734983	9.15614	2.191758	3.347049	4.187555	ENSG00000008441	-1.532292565	down	1.34E-10	2.74E-09	NFIX
ENSG00000008517.17_6	1666	1236	2025	6400	4687	5091	18.338711	29.924089	28.701895	84.134438	60.553188	68.047096	ENSG00000008517	1.45525368	up	4.36E-12	1.07E-10	IL32
ENSG00000008988.9_3	12203	6475	9634	26586	24294	20494	170.15892	199.385162	180.25354	472.268555	425.187073	362.270569	ENSG00000008988	1.096127543	up	1.12E-09	2.01E-08	RPS20
ENSG00000009413.16_6	565	406	596	195	447	328	0.66203	1.878009	0.862921	0.292691	0.565203	0.472921	ENSG00000009413	-1.007069217	down	0.000258166	0.001722933	REV3L
ENSG00000009790.15_7	99	19	35	0	0	5	0.844043	0.17388	0.199284	0	0	0.012443	ENSG00000009790	-5.137155807	down	5.63E-06	5.51E-05	TRAF3IP3
ENSG00000009950.16_7	70	7	40	9	0	7	0.231802	0.046652	0.162263	0.030026	0	0.023712	ENSG00000009950	-2.92542236	down	0.007370172	0.030928518	MLXIPL
ENSG00000010030.14_6	103	55	109	21	21	24	0.59926	0.667087	0.851491	0.140363	0.131924	0.17641	ENSG00000010030	-2.262050303	down	1.60E-05	0.00014097	ETV7
ENSG00000010310.9_6	162	130	118	46	35	23	0.518662	0.858102	0.541585	0.163027	0.124319	0.083742	ENSG00000010310	-2.269990896	down	2.34E-06	2.47E-05	GIPR
ENSG00000010318.21_5	66	41	50	12	9	20	0.357851	0.460939	0.615304	0.064805	0.050689	0.117286	ENSG00000010318	-2.224614692	down	0.001080813	0.006024224	PHF7
ENSG00000010404.18_6	3030	1615	2412	1105	1134	1267	13.473456	10.784381	14.098108	5.252622	5.288945	6.369112	ENSG00000010404	-1.26498627	down	2.07E-14	6.64E-13	IDS
ENSG00000010610.10_5	13	0	35	0	0	0	0.07699	0	0.280904	0	0	0	ENSG00000010610	-6.543390782	down	0.002299557	0.011568848	CD4
ENSG00000011052.21_4	39991	19829	30114	122662	127227	88098	339.547821	362.60321	340.254364	1257.776978	1296.398193	945.102539	ENSG00000011052	1.678139988	up	1.27E-18	5.80E-17	NME1-NME2
ENSG00000011260.14_4	768	676	969	1436	2636	3396	4.11085	8.330649	6.97176	9.622408	17.179144	23.290434	ENSG00000011260	1.288282706	up	1.41E-07	1.86E-06	UTP18
ENSG00000011426.11_8	1599	915	1185	514	847	746	3.498743	4.290018	3.502402	1.355619	2.225983	2.024441	ENSG00000011426	-1.099362988	down	4.87E-08	6.89E-07	ANLN
ENSG00000011465.17_7	82	33	62	0	16	10	0.118742	0.192613	0.262475	0	0.027468	0.017962	ENSG00000011465	-3.058260156	down	0.000333622	0.002165285	DCN
ENSG00000011638.10_4	168	226	236	976	1284	824	0.931111	2.449003	1.612968	5.92101	8.461286	5.803371	ENSG00000011638	1.932588817	up	9.54E-11	2.00E-09	TMEM159
ENSG00000013016.16_5	27	46	102	23	13	13	0.056189	0.203657	0.283632	0.05609	0.031156	0.03256	ENSG00000013016	-2.11255779	down	0.003582812	0.016796875	EHD3
ENSG00000013297.12_5	60	59	80	181	110	263	0.217467	0.464205	0.386882	0.797375	0.479245	1.210663	ENSG00000013297	1.163273376	up	0.008191705	0.033710808	CLDN11
ENSG00000013306.16_8	12550	4813	7913	22379	22300	21033	80.411728	62.390575	69.787933	169.365448	178.83223	166.989304	ENSG00000013306	1.168607483	up	3.65E-10	7.03E-09	SLC25A39
ENSG00000013588.9_7	951	537	826	2877	4083	2909	1.729152	2.11831	1.954411	5.523996	7.700078	5.968861	ENSG00000013588	1.827329284	up	1.20E-23	8.45E-22	GPRC5A
ENSG00000014914.21_5	400	181	318	126	174	108	1.721079	1.933901	1.618614	0.557669	1.072322	0.580074	ENSG00000014914	-1.374128609	down	1.19E-05	0.0001076	MTMR11
ENSG00000015475.18_6	10879	5380	9418	24656	20831	17392	96.985603	54.296658	58.956955	142.222519	226.570007	195.098709	ENSG00000015475	1.073359514	up	3.29E-08	4.77E-07	BID
ENSG00000015520.14_7	0	0	0	6	5	24	0	0	0	0.014346	0.009606	0.059256	ENSG00000015520	5.640872249	up	0.009555272	0.038238514	NPC1L1
ENSG00000017483.15_9	106	28	29	0	0	13	0.579299	0.225463	0.144998	0	0	0.061373	ENSG00000017483	-3.911386947	down	0.000367873	0.002365469	SLC38A5
ENSG00000018408.14_5	14547	7837	10564	1871	2774	2567	55.352715	59.662785	47.339554	7.55013	10.05701	9.632341	ENSG00000018408	-2.467388548	down	5.55E-54	1.35E-51	WWTR1
ENSG00000018625.15_4	0	13	6	52	56	105	0	0.051086	0.013464	0.116598	0.123604	0.244937	ENSG00000018625	2.929987218	up	0.001388574	0.007505533	ATP1A2
ENSG00000019186.10_5	76	93	94	28	32	37	0.443365	0.667078	0.382305	0.151698	0.118052	0.142695	ENSG00000019186	-1.802900709	down	0.000526331	0.003226184	CYP24A1
ENSG00000019505.8_6	19	4	8	0	0	0	0.036258	0.015415	0.020593	0	0	0	ENSG00000019505	-5.97119626	down	0.005273601	0.023315854	SYT13
ENSG00000019991.18_8	155	109	186	46	34	59	0.374885	0.623214	0.983171	0.191973	0.157161	0.348945	ENSG00000019991	-1.968629541	down	3.20E-06	3.29E-05	HGF
ENSG00000021300.14_7	780	278	392	81	111	169	3.994195	3.257554	2.642872	0.433353	0.590443	1.13553	ENSG00000021300	-2.245665559	down	5.34E-12	1.30E-10	PLEKHB1
ENSG00000023572.9_5	386	260	486	1430	2320	2137	4.440253	5.822121	7.525001	22.830557	36.3372	35.401566	ENSG00000023572	2.092160503	up	8.65E-24	6.12E-22	GLRX2
ENSG00000023608.5_5	11315	4499	6674	14794	29579	18339	43.899487	37.671482	34.620731	69.63308	138.290817	89.892769	ENSG00000023608	1.2350624	up	2.07E-08	3.09E-07	SNAPC1
ENSG00000023902.14_5	106	45	80	141	216	307	0.570471	0.499632	0.526916	0.502471	1.453757	2.832596	ENSG00000023902	1.263163002	up	0.000934297	0.005337385	PLEKHO1
ENSG00000024862.17_5	489	242	412	1064	1035	1082	3.879395	4.193152	4.327221	10.246422	9.842807	10.853161	ENSG00000024862	1.237631653	up	1.91E-09	3.33E-08	CCDC28A
ENSG00000025772.8_5	3827	1789	3006	7514	8992	7468	19.512947	19.688057	20.489985	46.477463	55.251598	48.110054	ENSG00000025772	1.238161865	up	2.53E-14	8.08E-13	TOMM34
ENSG00000026025.16_7	91364	40606	72383	25902	30265	41668	484.168304	470.446808	519.345215	168.321503	194.448669	280.346191	ENSG00000026025	-1.308073534	down	1.46E-14	4.77E-13	VIM
ENSG00000026103.22_5	580	416	576	73	101	159	1.637071	3.843559	2.667516	0.240331	0.329541	0.614844	ENSG00000026103	-2.553189811	down	1.27E-18	5.80E-17	FAS
ENSG00000026559.14_7	150	95	141	297	447	517	0.404605	0.550034	0.507821	0.971586	2.377489	2.571442	ENSG00000026559	1.41398339	up	6.83E-07	8.02E-06	KCNG1
ENSG00000026751.17_5	11	0	16	62	93	46	0.037725	0	0.079179	0.276712	0.416469	0.255751	ENSG00000026751	2.771367131	up	0.001022129	0.005750084	SLAMF7
ENSG00000026950.17_6	203	210	394	161	156	70	0.687846	1.524913	1.641177	0.568739	0.566135	0.470339	ENSG00000026950	-1.330827714	down	0.00121089	0.006667382	BTN3A1
ENSG00000027001.10_6	100	65	70	137	214	256	0.418443	0.578408	0.396229	0.784804	1.083826	1.413467	ENSG00000027001	1.057169741	up	0.00490724	0.021980154	MIPEP
ENSG00000027075.15_6	315	183	326	134	218	92	1.005157	1.695367	1.641804	0.748716	1.227439	0.325921	ENSG00000027075	-1.149279401	down	0.001134345	0.006285498	PRKCH
ENSG00000027644.5_5	9	3	14	0	0	0	0.016381	0.010022	0.035182	0	0	0	ENSG00000027644	-5.741484452	down	0.010978981	0.042928416	INSRR
ENSG00000028310.18_6	351	170	372	628	787	824	1.352556	1.494727	1.967636	3.019173	3.688931	3.942937	ENSG00000028310	1.082476901	up	2.07E-06	2.20E-05	BRD9
ENSG00000028839.10_6	1709	752	1233	2603	2903	3249	5.38244	4.908245	6.628701	8.743217	9.296656	10.722737	ENSG00000028839	1.006670122	up	7.41E-09	1.18E-07	TBPL1
ENSG00000029534.21_9	121	127	144	77	19	52	0.217815	0.471639	0.332696	0.166382	0.027017	0.080098	ENSG00000029534	-1.692353616	down	0.001703737	0.008937045	ANK1
ENSG00000029559.7_4	7	37	26	0	0	4	0.040423	0.507265	0.219612	0	0	0.028982	ENSG00000029559	-4.680947627	down	0.000877168	0.00505877	IBSP
ENSG00000031698.13_5	24496	13496	19160	152643	189349	173387	130.498199	155.725647	137.850281	987.361938	1218.556641	1169.187134	ENSG00000031698	2.907130441	up	6.02E-97	4.58E-94	SARS1
ENSG00000033030.15_7	222	128	116	400	613	442	0.541105	0.631131	0.458211	1.222718	1.880029	1.455413	ENSG00000033030	1.352149033	up	8.60E-06	8.06E-05	ZCCHC8
ENSG00000033050.9_6	2515	1070	1852	5239	7466	6267	5.625107	5.198581	5.720819	14.159874	20.150141	17.611168	ENSG00000033050	1.565254074	up	1.49E-19	7.45E-18	ABCF2
ENSG00000033100.16_5	282	206	334	134	54	113	0.814145	1.124451	1.128986	0.408867	0.162278	0.407936	ENSG00000033100	-1.699807415	down	1.27E-05	0.000114471	CHPF2
ENSG00000034677.13_6	805	448	844	262	345	368	2.708629	2.585491	3.161079	0.746712	1.389415	1.1456	ENSG00000034677	-1.367584766	down	3.27E-10	6.34E-09	RNF19A
ENSG00000035499.13_5	384	278	338	109	200	210	1.55425	2.419248	1.945581	0.540739	0.960956	1.06489	ENSG00000035499	-1.269540645	down	2.14E-05	0.000183661	DEPDC1B
ENSG00000035664.11_7	93	127	117	48	39	74	0.201597	0.765738	0.481946	0.165766	0.169909	0.194198	ENSG00000035664	-1.446609268	down	0.003082487	0.014840325	DAPK2
ENSG00000035681.9_7	77	70	114	313	351	288	0.204179	0.399855	0.439794	1.226929	1.246909	1.137989	ENSG00000035681	1.575835783	up	2.64E-06	2.75E-05	NSMAF
ENSG00000035687.10_6	327	181	411	731	1019	1198	1.301019	1.640149	2.202535	3.536021	4.842034	5.996381	ENSG00000035687	1.419701496	up	2.01E-09	3.46E-08	ADSS2
ENSG00000036054.13_5	1252	910	913	435	796	527	3.437131	5.46037	3.163932	1.447024	2.660866	1.85551	ENSG00000036054	-1.130141095	down	3.81E-06	3.87E-05	TBC1D23
ENSG00000036448.10_5	25	20	43	142	170	190	0.108167	0.532591	0.342099	1.530838	1.548842	3.256245	ENSG00000036448	2.232145643	up	7.15E-07	8.37E-06	MYOM2
ENSG00000036672.16_6	95	43	84	15	20	24	0.28851	0.251621	0.329853	0.048201	0.065497	0.079306	ENSG00000036672	-2.158345956	down	0.000152705	0.001080839	USP2
ENSG00000038427.16_6	3247	1530	2625	915	1637	1455	5.036585	3.887434	4.853498	1.365137	2.893014	2.607914	ENSG00000038427	-1.146663177	down	2.28E-09	3.90E-08	VCAN
ENSG00000040531.16_6	381	102	249	748	868	731	1.255394	0.530378	1.102579	3.124856	4.021447	3.940222	ENSG00000040531	1.501135517	up	1.10E-07	1.46E-06	CTNS
ENSG00000040731.10_6	21	26	44	8	0	0	0.059894	0.162868	0.168614	0.028401	0	0	ENSG00000040731	-3.694597026	down	0.003105158	0.0149312	CDH10
ENSG00000042286.15_5	791	225	403	1741	1631	1547	2.495313	1.554137	1.737842	6.752352	6.265821	6.304696	ENSG00000042286	1.616543959	up	6.64E-10	1.24E-08	AIFM2
ENSG00000042753.12_4	59768	33083	36208	25368	27037	21491	751.370972	861.541321	582.20459	361.996765	383.72702	333.023804	ENSG00000042753	-1.067084118	down	2.15E-08	3.20E-07	AP2S1
ENSG00000042980.13_4	15	21	51	0	0	11	0.161604	0.400098	0.173148	0	0	0.018954	ENSG00000042980	-3.360374136	down	0.009058536	0.036639263	ADAM28
ENSG00000044524.11_4	709	531	530	40	171	142	1.811361	2.057763	1.827139	0.084191	0.362424	0.393166	ENSG00000044524	-2.689154056	down	2.39E-13	6.88E-12	EPHA3
ENSG00000044574.8_5	157257	85165	120609	1339870	1354773	1555022	403.511627	471.637482	413.78302	4170.817383	4188.791992	5040.901367	ENSG00000044574	3.28990158	up	6.30E-114	6.47E-111	HSPA5
ENSG00000046651.15_6	3481	1462	2462	1095	1232	1584	11.128731	10.704333	10.27417	5.265012	4.510031	5.888754	ENSG00000046651	-1.158312718	down	7.63E-10	1.41E-08	OFD1
ENSG00000046653.15_6	8069	4495	6298	267	417	389	20.704082	25.093952	21.462135	0.845207	1.292551	1.282208	ENSG00000046653	-4.415079605	down	9.63E-152	3.25E-148	GPM6B
ENSG00000046889.19_5	54	21	43	6	12	4	0.056226	0.04146	0.053441	0.005864	0.012425	0.004196	ENSG00000046889	-2.646516331	down	0.001580726	0.008377883	PREX2
ENSG00000047457.14_6	1064	698	865	120	89	146	3.375503	4.330275	4.255344	0.422117	0.596094	0.67305	ENSG00000047457	-3.169538487	down	1.30E-35	1.62E-33	CP
ENSG00000047579.20_5	353	218	416	672	848	993	2.518734	3.100602	3.884932	5.922412	7.338625	9.009365	ENSG00000047579	1.0758104	up	1.37E-06	1.52E-05	DTNBP1
ENSG00000048052.21_7	1578	851	1419	398	610	516	10.365396	12.09751	12.999723	4.062957	5.323165	4.843275	ENSG00000048052	-1.60227615	down	6.11E-17	2.43E-15	HDAC9
ENSG00000048162.21_5	2384	926	1486	10114	10972	7324	26.614061	22.200562	21.875546	138.037003	149.442566	104.474251	ENSG00000048162	2.35958959	up	1.43E-27	1.26E-25	NOP16
ENSG00000048540.15_9	379	242	446	76	44	84	1.925438	1.717511	2.585071	0.845532	0.138561	0.370541	ENSG00000048540	-2.639049162	down	1.09E-14	3.62E-13	LMO3
ENSG00000048544.6_5	4170	2704	4571	9913	12696	9924	19.973991	27.950251	29.279955	57.614895	73.293243	60.063461	ENSG00000048544	1.236576534	up	2.66E-14	8.47E-13	MRPS10
ENSG00000049249.9_5	264	201	433	1082	1600	1546	0.517629	0.741117	1.106662	3.969339	3.833409	6.199168	ENSG00000049249	1.950613814	up	5.77E-16	2.11E-14	TNFRSF9
ENSG00000049759.18_7	304	90	298	515	712	708	0.520738	0.225033	0.649399	1.838478	2.654916	2.824282	ENSG00000049759	1.285025839	up	9.84E-06	9.11E-05	NEDD4L
ENSG00000049860.14_5	1155	745	1837	2270	2956	7224	6.486605	9.002687	13.805614	15.408455	19.872765	51.168503	ENSG00000049860	1.446238824	up	0.004724685	0.021291749	HEXB
ENSG00000050405.13_7	3128	1360	2344	675	1293	956	8.825096	8.895111	9.115376	2.323211	4.305821	3.309225	ENSG00000050405	-1.4758965	down	2.32E-12	5.88E-11	LIMA1
ENSG00000050438.17_4	151	95	133	58	59	52	0.522613	0.54895	0.650437	0.156634	0.196167	0.223531	ENSG00000050438	-1.432927921	down	0.000499045	0.003090228	SLC4A8
ENSG00000050730.16_7	88	73	132	3	15	16	0.446047	0.654781	0.738097	0.01385	0.070875	0.084137	ENSG00000050730	-3.440628297	down	2.94E-08	4.30E-07	TNIP3
ENSG00000051108.15_8	7767	4758	7023	66680	63949	67420	34.212952	53.143997	50.611149	441.633698	401.088348	443.659515	ENSG00000051108	3.076909318	up	6.11E-96	4.32E-93	HERPUD1
ENSG00000051128.19_7	18	8	5	26	69	58	0.089277	0.08195	0.02904	0.156925	0.529993	0.384008	ENSG00000051128	2.007120516	up	0.011918083	0.045870921	HOMER3
ENSG00000051180.17_5	403	232	531	718	913	1242	1.664205	2.063632	3.451187	3.710721	5.160216	6.985484	ENSG00000051180	1.036969194	up	2.11E-05	0.000181199	RAD51
ENSG00000052126.14_6	383	244	382	46	39	70	2.202287	4.588289	3.737411	0.110967	0.339972	0.144068	ENSG00000052126	-2.980335737	down	1.86E-19	9.09E-18	PLEKHA5
ENSG00000052344.16_5	42	40	24	0	0	0	0.226817	0.631877	0.166363	0	0	0	ENSG00000052344	-7.948085907	down	1.19E-07	1.58E-06	PRSS8
ENSG00000053371.12_8	1512	725	1427	2598	3190	6695	11.16227	11.552692	14.303434	23.273672	28.383501	62.466454	ENSG00000053371	1.500598442	up	3.67E-09	6.08E-08	AKR7A2
ENSG00000053372.5_5	2418	1402	2089	4544	6083	4832	12.044863	14.957054	13.867948	27.250433	36.230522	30.181242	ENSG00000053372	1.118575011	up	2.37E-12	6.00E-11	MRTO4
ENSG00000053501.13_5	1502	728	931	3325	3274	2876	17.667208	17.233109	14.459992	47.602154	48.489773	43.969425	ENSG00000053501	1.343601646	up	2.00E-11	4.54E-10	USE1
ENSG00000054356.14_7	91	26	34	0	0	4	0.245136	0.106633	0.120842	0	0	0.009575	ENSG00000054356	-5.474946377	down	1.45E-06	1.60E-05	PTPRN
ENSG00000054965.10_5	225	133	165	117	95	40	0.344874	0.494913	0.441823	0.195395	0.15507	0.068199	ENSG00000054965	-1.286480723	down	0.004297178	0.019680807	FAM168A
ENSG00000055044.11_4	4400	2724	4393	11278	15973	11663	24.861391	31.149733	31.67425	72.951096	101.607201	79.145508	ENSG00000055044	1.483938171	up	1.16E-19	5.80E-18	NOP58
ENSG00000055208.19_6	393	269	279	86	171	238	0.979082	1.607701	1.161877	0.316796	0.512129	0.751094	ENSG00000055208	-1.263521192	down	0.000243919	0.001639436	TAB2
ENSG00000055332.18_8	2430	1923	2153	345	457	662	2.919433	4.320815	3.406353	0.497133	0.586635	0.878264	ENSG00000055332	-2.485714806	down	4.16E-29	4.04E-27	EIF2AK2
ENSG00000055609.18_7	1729	772	1306	533	708	811	1.506909	1.508634	1.160175	0.414397	0.543258	0.623441	ENSG00000055609	-1.140423745	down	7.15E-09	1.14E-07	KMT2C
ENSG00000056291.17_4	55	30	80	24	8	25	0.283999	0.334866	0.555348	0.151733	0.072569	0.164538	ENSG00000056291	-1.745253437	down	0.012577851	0.047863965	NPFFR2
ENSG00000056736.10_6	132	54	174	18	68	68	0.565211	0.588455	1.11729	0.103569	0.387538	0.320796	ENSG00000056736	-1.483068312	down	0.005354155	0.023601277	IL17RB
ENSG00000057149.16_6	302	249	307	56	71	59	1.775981	3.157713	2.417437	0.394885	0.497335	0.433866	ENSG00000057149	-2.516889356	down	1.97E-14	6.36E-13	SERPINB3
ENSG00000057704.13_7	56	33	97	130	170	210	0.09521	0.119526	0.221194	0.269266	0.350833	0.637053	ENSG00000057704	1.200538236	up	0.005003103	0.022371328	TMCC3
ENSG00000058091.17_7	506	323	396	157	215	230	1.092576	1.719774	1.22971	0.558824	0.604972	0.837557	ENSG00000058091	-1.321398649	down	3.47E-07	4.30E-06	CDK14
ENSG00000059728.11_5	36	39	41	133	342	186	0.063155	0.150988	0.098327	0.287862	0.742343	0.42255	ENSG00000059728	2.148826379	up	1.95E-06	2.08E-05	MXD1
ENSG00000060069.17_3	0	0	0	23	11	56	0	0	0	0.156182	0.033676	0.426339	ENSG00000060069	7.027496854	up	2.55E-05	0.000215289	CTDP1
ENSG00000060140.9_8	18	19	54	0	7	0	0.064677	0.147218	0.258394	0	0.027069	0	ENSG00000060140	-4.024072572	down	0.001468639	0.007880707	STYK1
ENSG00000060656.20_5	1297	757	1146	411	323	478	2.548723	3.002358	2.993291	0.944939	0.701828	1.121731	ENSG00000060656	-1.65981164	down	3.37E-14	1.06E-12	PTPRU
ENSG00000060688.13_6	5196	2209	4277	8917	11862	9464	32.882107	30.191217	35.920067	67.851715	90.240326	75.442207	ENSG00000060688	1.144218861	up	1.84E-11	4.19E-10	SNRNP40
ENSG00000060718.22_7	2014	1230	1838	557	778	1136	2.953535	3.832882	3.671253	0.994074	1.344449	2.037366	ENSG00000060718	-1.335713528	down	3.23E-10	6.26E-09	COL11A1
ENSG00000060982.15_7	2944	1583	2262	4506	6205	6182	9.008653	8.145816	8.328627	18.531136	19.695934	17.539377	ENSG00000060982	1.043654193	up	1.50E-11	3.48E-10	BCAT1
ENSG00000061337.15_6	653	343	559	312	218	370	1.151092	1.303874	1.316542	0.665734	0.461814	0.823736	ENSG00000061337	-1.03307167	down	0.000109802	0.000806435	LZTS1
ENSG00000061656.10_8	375	221	186	143	57	133	3.123924	3.455499	2.150047	1.636049	0.4846	1.07814	ENSG00000061656	-1.49219533	down	0.000336994	0.002186568	SPAG4
ENSG00000061918.13_5	360	246	416	75	76	145	1.426719	1.774742	1.86517	0.26383	0.318145	0.531262	ENSG00000061918	-2.079198097	down	2.35E-10	4.67E-09	GUCY1B1
ENSG00000061987.16_6	472	421	483	161	232	284	1.011851	1.954084	0.947071	0.289591	0.363715	0.431243	ENSG00000061987	-1.364619029	down	8.32E-07	9.62E-06	MON2
ENSG00000062096.15_4	69	44	40	0	0	0	0.318267	0.438365	0.243318	0	0	0	ENSG00000062096	-8.409979385	down	2.61E-09	4.42E-08	ARSF
ENSG00000063046.17_5	1793	964	1805	4870	5539	5303	4.99259	5.361357	6.857921	15.793427	16.32357	16.454317	ENSG00000063046	1.535827342	up	6.89E-23	4.59E-21	EIF4B
ENSG00000063127.16_8	42	77	56	14	30	26	0.215443	1.099694	0.581316	0.191741	0.120569	0.109482	ENSG00000063127	-1.768448944	down	0.006854121	0.029093961	SLC6A16
ENSG00000063176.16_7	842	314	607	236	307	356	3.653704	2.480529	3.482267	1.093558	1.35372	1.707327	ENSG00000063176	-1.198814652	down	1.88E-06	2.01E-05	SPHK2
ENSG00000063180.9_5	155	74	201	47	48	86	0.906111	0.933758	1.595762	0.359987	0.345376	0.653089	ENSG00000063180	-1.488331993	down	0.000702311	0.004164294	CA11
ENSG00000063854.13_5	482	227	471	2625	2654	3125	2.23236	3.306406	4.275593	18.915955	16.858978	23.441347	ENSG00000063854	2.59717047	up	1.80E-44	3.12E-42	HAGH
ENSG00000064042.18_5	3068	1659	2879	1010	1095	1312	6.566531	12.523936	10.203439	3.129155	4.346457	3.870765	ENSG00000064042	-1.411070911	down	6.35E-18	2.72E-16	LIMCH1
ENSG00000064195.7_5	8	14	41	0	0	0	0.096509	0.108599	0.218638	0	0	0	ENSG00000064195	-7.122704397	down	3.94E-05	0.000318165	DLX3
ENSG00000064225.12_5	195	179	397	91	163	199	2.393325	3.917097	7.506531	1.141773	2.345245	2.647457	ENSG00000064225	-1.077987682	down	0.003885882	0.018031501	ST3GAL6
ENSG00000064300.9_5	38	54	82	0	19	26	0.111947	0.341601	0.319829	0	0.06479	0.096196	ENSG00000064300	-2.371907167	down	0.006880039	0.029182988	NGFR
ENSG00000064313.12_6	1123	916	1222	483	640	744	2.391042	4.09958	3.622268	1.255657	1.809585	1.983896	ENSG00000064313	-1.123533099	down	8.07E-08	1.10E-06	TAF2
ENSG00000064490.14_6	8187	3524	6787	15798	16538	14448	72.732643	67.391113	78.050079	182.303436	181.081818	165.061447	ENSG00000064490	1.121206262	up	5.12E-11	1.11E-09	RFXANK
ENSG00000064687.13_4	244	123	240	97	88	112	0.357749	0.766888	0.535342	0.227665	0.190995	0.234582	ENSG00000064687	-1.270202437	down	0.000185485	0.001288517	ABCA7
ENSG00000064886.14_6	120	181	135	10	50	8	0.909434	2.623385	1.189933	0.054022	0.278125	0.044459	ENSG00000064886	-3.119620276	down	5.98E-07	7.10E-06	CHI3L2
ENSG00000064989.13_5	41	80	46	0	20	18	0.076619	1.250852	0.233369	0	0.205621	0.205156	ENSG00000064989	-2.66169254	down	0.002765289	0.013517217	CALCRL
ENSG00000065054.14_6	67	31	74	97	159	185	0.547082	0.484859	0.511472	0.911159	1.568796	1.821968	ENSG00000065054	1.102493775	up	0.010400124	0.04103309	SLC9A3R2
ENSG00000065060.17_4	230	124	117	401	486	470	0.240959	0.2847	0.163912	0.513565	0.622291	0.63193	ENSG00000065060	1.249731622	up	2.24E-05	0.00019126	UHRF1BP1
ENSG00000065268.11_4	625	251	695	1118	1609	2762	4.136648	3.83827	6.146431	9.032719	12.994115	23.299936	ENSG00000065268	1.562302551	up	1.24E-08	1.92E-07	WDR18
ENSG00000065526.12_5	735	390	697	176	237	354	0.597078	0.915708	1.002413	0.239872	0.300605	0.569574	ENSG00000065526	-1.520478583	down	3.83E-09	6.33E-08	SPEN
ENSG00000065534.18_5	1534	1037	1693	645	796	842	2.485155	3.520114	3.770488	0.940098	1.326133	1.438299	ENSG00000065534	-1.184621951	down	4.96E-11	1.07E-09	MYLK
ENSG00000065600.12_6	192	107	227	672	719	745	0.819175	0.93104	1.230527	3.309999	3.517976	3.848077	ENSG00000065600	1.774477534	up	3.07E-13	8.61E-12	PACC1
ENSG00000065665.21_5	106	62	138	235	329	236	0.881132	0.77136	1.24393	1.865145	2.498687	1.400673	ENSG00000065665	1.133443856	up	0.00083046	0.004822388	SEC61A2
ENSG00000065802.12_4	664	343	572	1435	2705	2028	1.056189	1.250156	1.115861	2.895083	6.63444	4.042693	ENSG00000065802	1.695366791	up	4.80E-16	1.78E-14	ASB1
ENSG00000065809.13_8	41	69	83	126	264	304	0.10792	0.394931	0.293896	0.403174	0.940001	1.267846	ENSG00000065809	1.445880756	up	0.00131833	0.0071819	FAM107B
ENSG00000065833.9_5	0	17	17	0	0	0	0	0.104777	0.064587	0	0	0	ENSG00000065833	-6.431702916	down	0.003527047	0.01655846	ME1
ENSG00000065911.12_4	1263	1017	1461	7058	11478	10692	3.339075	5.394557	4.541889	19.863411	31.727461	30.984921	ENSG00000065911	2.648104573	up	7.77E-48	1.50E-45	MTHFD2
ENSG00000066248.15_7	7	8	8	50	41	45	0.019718	0.054559	0.032053	0.189318	0.155297	0.177406	ENSG00000066248	2.246933957	up	0.00477513	0.021498557	NGEF
ENSG00000066279.18_6	1419	949	1462	395	588	776	1.313875	1.895753	1.809794	0.443187	0.655189	0.907708	ENSG00000066279	-1.424809753	down	4.71E-11	1.02E-09	ASPM
ENSG00000066322.15_6	9912	5165	8142	28402	28625	22234	69.028015	78.797737	76.273537	243.157516	235.074097	196.122498	ENSG00000066322	1.533938583	up	3.05E-18	1.35E-16	ELOVL1
ENSG00000066557.6_5	186	208	210	62	151	114	0.654978	1.587851	0.990178	0.262857	0.640661	0.509321	ENSG00000066557	-1.267196455	down	0.001313291	0.007157753	LRRC40
ENSG00000067066.17_6	5757	2996	4299	1159	1574	1676	17.096264	24.155025	18.851324	5.012136	6.602366	6.360604	ENSG00000067066	-1.834736781	down	9.47E-30	9.60E-28	SP100
ENSG00000067082.15_5	9786	4115	7152	15318	21122	13372	23.672756	20.985531	27.363663	43.608154	70.275757	50.453064	ENSG00000067082	1.016820604	up	1.67E-07	2.17E-06	KLF6
ENSG00000067113.17_6	1455	703	1301	232	308	455	9.518762	9.98801	11.371976	1.819235	2.540142	3.783689	ENSG00000067113	-2.058519128	down	4.37E-19	2.09E-17	PLPP1
ENSG00000067225.18_7	363574	178723	209493	46297	44912	49102	1606.240479	1705.806519	1239.720459	249.971512	242.489212	279.129608	ENSG00000067225	-2.672688	down	8.98E-50	1.86E-47	PKM
ENSG00000067715.14_5	637	239	355	1632	2407	2344	1.545008	1.686406	1.176311	5.866848	8.352014	7.52522	ENSG00000067715	2.137159333	up	5.61E-22	3.36E-20	SYT1
ENSG00000067992.15_8	29017	23868	33919	2676	2941	3615	24.924118	43.016884	37.74876	4.003493	6.844038	5.862657	ENSG00000067992	-3.541992066	down	7.46E-97	5.50E-94	PDK3
ENSG00000068028.17_5	871	405	698	1924	2814	2176	4.985981	4.988114	5.337389	13.356069	19.40505	15.730045	ENSG00000068028	1.561757718	up	1.29E-16	5.01E-15	RASSF1
ENSG00000068079.8_3	34481	13297	22619	3552	3675	4124	290.95517	241.785263	255.048615	36.641182	37.27264	44.486835	ENSG00000068079	-2.850552892	down	1.49E-58	4.09E-56	IFI35
ENSG00000068985.5_5	79	45	98	205	173	160	1.203053	1.477935	1.988079	3.793272	3.17866	3.075893	ENSG00000068985	1.047451484	up	0.007633225	0.03185684	PAGE1
ENSG00000069188.17_6	0	0	0	8	13	13	0	0	0	0.00824	0.014123	0.013767	ENSG00000069188	5.622888288	up	0.00843378	0.034526427	SDK2
ENSG00000069424.15_4	417	210	483	141	118	145	1.472254	1.676255	2.092125	0.786716	1.007246	0.831308	ENSG00000069424	-1.68429434	down	1.65E-08	2.49E-07	KCNAB2
ENSG00000069667.16_8	390	276	761	182	264	315	1.055383	1.777113	2.148171	1.044688	1.430634	0.864912	ENSG00000069667	-1.177108193	down	0.0001852	0.001286916	RORA
ENSG00000069943.10_4	758	483	861	375	370	442	4.739865	5.671648	6.188769	2.484881	2.456315	3.021217	ENSG00000069943	-1.089534845	down	6.25E-07	7.40E-06	PIGB
ENSG00000070018.9_7	1149	721	1225	561	518	497	1.393775	1.622643	1.732539	0.685565	0.801617	0.631848	ENSG00000070018	-1.228266398	down	3.99E-09	6.59E-08	LRP6
ENSG00000070061.15_8	733	395	710	209	389	449	1.259095	1.449286	1.614221	0.430698	0.796448	0.965149	ENSG00000070061	-1.092855751	down	2.16E-05	0.000185241	ELP1
ENSG00000070087.14_6	22377	12784	18416	7875	8670	9263	124.957237	152.069519	135.854813	46.893581	53.217236	63.476799	ENSG00000070087	-1.320686936	down	1.06E-21	6.29E-20	PFN2
ENSG00000070214.16_4	1012	734	1203	389	431	736	1.061527	1.815757	1.957557	0.45248	0.731689	1.205237	ENSG00000070214	-1.222752891	down	4.75E-07	5.75E-06	SLC44A1
ENSG00000070371.16_6	165	91	152	555	686	677	0.336021	0.365253	0.421526	1.336765	1.56379	1.572806	ENSG00000070371	1.970567204	up	2.52E-16	9.60E-15	CLTCL1
ENSG00000070404.10_8	485	380	422	2080	2130	2508	1.949135	3.845243	2.707978	11.821544	10.319337	14.855794	ENSG00000070404	2.075712611	up	1.54E-25	1.20E-23	FSTL3
ENSG00000070540.13_7	825	443	775	2935	3227	3958	5.96798	5.86772	6.212016	22.004002	21.824478	29.083055	ENSG00000070540	2.050397113	up	1.58E-34	1.86E-32	WIPI1
ENSG00000070669.17_6	532	233	526	4255	6224	6040	2.590722	2.172144	3.119532	22.334484	32.742069	37.087959	ENSG00000070669	3.436375478	up	5.54E-78	2.47E-75	ASNS
ENSG00000070729.14_6	33	3	0	0	0	0	0.057814	0.009571	0	0	0	0	ENSG00000070729	-6.107558956	down	0.010707268	0.042002408	CNGB1
ENSG00000070756.16_8	3308	1648	2465	4847	6460	7683	11.734697	12.638091	11.817437	21.276606	27.751307	34.517853	ENSG00000070756	1.089730733	up	6.15E-11	1.31E-09	PABPC1
ENSG00000071051.14_5	211	91	147	232	355	640	0.794529	0.737168	0.737245	1.061521	1.609825	3.401151	ENSG00000071051	1.179854541	up	0.000646949	0.003879885	NCK2
ENSG00000071082.11_5	21536	9851	13438	39768	35617	32184	191.771423	188.035568	161.842773	452.276733	394.120514	356.737976	ENSG00000071082	1.037025436	up	6.11E-08	8.52E-07	RPL31
ENSG00000071242.12_7	190	90	230	1267	1250	1215	0.317421	0.324893	0.514137	2.579259	2.550857	2.677896	ENSG00000071242	2.649132968	up	2.25E-28	2.09E-26	RPS6KA2
ENSG00000071246.11_5	300	148	271	195	94	95	0.466707	0.496469	0.563649	0.413165	0.175783	0.233014	ENSG00000071246	-1.09511147	down	0.005704569	0.02492713	VASH1
ENSG00000071282.12_5	1176	415	905	173	220	198	4.493458	1.555931	2.957373	0.463656	0.452565	0.412593	ENSG00000071282	-2.287947783	down	3.01E-20	1.59E-18	LMCD1
ENSG00000071537.14_6	634	535	766	1613	1931	2755	0.914339	1.566341	1.617369	2.525066	3.195903	4.580117	ENSG00000071537	1.383763873	up	1.44E-10	2.94E-09	SEL1L
ENSG00000071575.11_3	5208	3078	4541	477	378	610	15.480941	18.278732	17.208393	1.676458	1.170196	2.106051	ENSG00000071575	-3.395754791	down	1.23E-68	4.26E-66	TRIB2
ENSG00000071794.16_6	6876	4066	5608	2096	3752	3576	13.037584	16.691044	14.352793	6.198989	8.621144	10.391509	ENSG00000071794	-1.107877692	down	7.47E-10	1.38E-08	HLTF
ENSG00000071859.15_4	1817	931	1557	3062	4126	4782	13.775595	15.094796	15.807719	27.898932	37.38168	45.203751	ENSG00000071859	1.210951675	up	2.87E-13	8.15E-12	FAM50A
ENSG00000071889.16_6	118	61	106	179	154	452	0.494202	0.705619	0.588593	0.549381	1.020979	3.188245	ENSG00000071889	1.186064073	up	0.004301805	0.019698179	FAM3A
ENSG00000072071.16_7	390	288	329	206	182	221	0.536275	0.794356	0.591875	0.320125	0.306146	0.357152	ENSG00000072071	-1.020793982	down	0.000288193	0.001901817	ADGRL1
ENSG00000072210.19_7	2209	1375	2409	790	818	1203	6.452816	8.283907	10.01077	2.738242	2.902157	4.355629	ENSG00000072210	-1.366242279	down	1.56E-12	4.00E-11	ALDH3A2
ENSG00000072310.17_6	175	33	106	41	24	38	0.687595	0.203217	0.41869	0.110529	0.159805	0.096384	ENSG00000072310	-1.737483486	down	0.002120176	0.010783612	SREBF1
ENSG00000072415.9_8	636	419	527	185	322	409	1.564453	2.335487	1.404009	0.49978	0.8895	1.026631	ENSG00000072415	-1.104398411	down	4.27E-05	0.000342324	MPP5
ENSG00000072501.18_4	3228	1840	2381	647	1390	1260	3.505822	4.022563	3.33148	0.792868	1.837946	1.650877	ENSG00000072501	-1.476988624	down	1.46E-11	3.40E-10	SMC1A
ENSG00000072840.13_5	86	78	74	39	48	18	0.166075	0.261549	0.169726	0.073208	0.089939	0.035493	ENSG00000072840	-1.4957734	down	0.008427248	0.034505669	EVC
ENSG00000073008.15_6	686	348	635	2133	3183	3193	1.333448	1.566808	1.47242	4.723984	8.169456	10.669702	ENSG00000073008	2.088099205	up	1.74E-31	1.85E-29	PVR
ENSG00000073146.16_5	11	5	10	197	251	214	0.026036	0.023414	0.052531	0.764006	0.880101	0.701686	ENSG00000073146	4.41898546	up	8.75E-20	4.46E-18	MOV10L1
ENSG00000073464.12_7	211	135	203	45	60	49	0.31315	0.43178	0.403463	0.080491	0.107021	0.090843	ENSG00000073464	-2.112298794	down	1.24E-08	1.92E-07	CLCN4
ENSG00000073536.18_5	202	138	142	374	479	406	0.384475	0.950929	0.360684	1.618377	1.09857	2.567459	ENSG00000073536	1.086519757	up	0.000116375	0.000850736	NLE1
ENSG00000073711.11_6	277	175	280	72	162	157	0.435335	0.561959	0.624738	0.278413	0.371386	0.500794	ENSG00000073711	-1.207879929	down	0.000390725	0.002497447	PPP2R3A
ENSG00000073756.12_5	64	18	63	0	17	11	0.140543	0.086408	0.201847	0	0.04412	0.028747	ENSG00000073756	-2.623846307	down	0.005139751	0.022852479	PTGS2
ENSG00000073849.15_5	76	48	62	12	16	20	0.434857	0.306582	0.194091	0.113213	0.03918	0.050119	ENSG00000073849	-2.248781237	down	0.000242158	0.001628993	ST6GAL1
ENSG00000073969.18_5	487	305	470	178	285	215	1.229708	1.658616	1.611055	0.544973	0.969678	0.684526	ENSG00000073969	-1.179062462	down	4.83E-06	4.80E-05	NSF
ENSG00000074071.15_5	4496	1769	2788	7361	8172	6700	45.090923	38.459946	37.434837	90.257286	99.389175	85.179497	ENSG00000074071	1.080053855	up	2.12E-08	3.16E-07	MRPS34
ENSG00000074201.9_7	2630	1061	1867	6779	6584	6110	9.885514	8.299389	9.350153	33.248325	30.729927	27.024704	ENSG00000074201	1.59702341	up	1.38E-17	5.70E-16	CLNS1A
ENSG00000074410.14_6	2902	1886	2821	1121	866	1378	5.483568	8.105078	7.9773	2.243719	1.717918	2.872304	ENSG00000074410	-1.448933754	down	5.31E-13	1.45E-11	CA12
ENSG00000074696.13_5	23267	13858	18767	8679	11663	12920	74.539413	95.769348	78.642792	33.834702	46.074402	58.409382	ENSG00000074696	-1.035575272	down	3.70E-12	9.22E-11	HACD3
ENSG00000074706.13_8	23	17	25	0	2	0	0.033933	0.05497	0.049848	0	0.036328	0	ENSG00000074706	-5.341754953	down	0.000491221	0.003046578	IPCEF1
ENSG00000074842.8_7	14974	7094	18275	49459	41462	66121	152.334793	156.205261	248.819656	610.52771	508.586731	849.946106	ENSG00000074842	1.737123204	up	5.96E-17	2.37E-15	MYDGF
ENSG00000074935.14_5	123	148	147	518	792	553	0.708715	2.043867	1.574573	3.548992	5.049501	3.751261	ENSG00000074935	1.795535066	up	5.65E-09	9.12E-08	TUBE1
ENSG00000075142.14_5	22055	8024	16051	40397	41151	34060	146.005875	104.56398	119.89122	341.923157	330.838684	289.187897	ENSG00000075142	1.1292142	up	5.65E-09	9.12E-08	SRI
ENSG00000075618.18_4	542	365	599	200	226	464	1.958648	2.839797	2.893875	0.904349	0.983679	2.152193	ENSG00000075618	-1.059934765	down	0.000396941	0.002532374	FSCN1
ENSG00000075624.16_8	2560410	1131522	1595129	610539	899556	725719	14220.99219	13570.0918	11873.11816	4113.968262	5926.869629	4979.334961	ENSG00000075624	-1.489595464	down	1.40E-17	5.79E-16	ACTB
ENSG00000075643.6_5	9	4	39	87	219	255	0.01302	0.013394	0.084516	0.170585	0.428012	0.523339	ENSG00000075643	3.190524058	up	3.56E-07	4.40E-06	MOCOS
ENSG00000075651.16_6	670	455	646	203	442	384	2.006592	4.26791	5.651268	0.882775	2.060998	2.024779	ENSG00000075651	-1.096441858	down	2.86E-05	0.000237682	PLD1
ENSG00000075790.10_7	2076	1199	1618	882	1034	943	8.272637	10.842466	10.512567	5.576518	6.444762	6.315642	ENSG00000075790	-1.044496269	down	2.42E-09	4.11E-08	BCAP29
ENSG00000075914.13_5	5544	2496	4220	12756	12416	10538	48.157288	50.678936	46.378769	132.37149	137.526062	118.446907	ENSG00000075914	1.32167182	up	2.20E-13	6.38E-12	EXOSC7
ENSG00000076003.5_5	1002	578	1084	474	519	494	2.685587	3.341602	3.884287	1.541286	1.676324	1.671726	ENSG00000076003	-1.093629807	down	6.65E-08	9.21E-07	MCM6
ENSG00000076043.10_7	5141	2258	4294	14072	14996	12560	48.084873	47.371101	52.375828	157.20903	174.105118	148.055099	ENSG00000076043	1.612175579	up	8.05E-21	4.49E-19	REXO2
ENSG00000076770.14_6	50	64	95	23	15	50	0.359383	0.121794	0.98557	0.252368	0.015658	0.056397	ENSG00000076770	-1.597175351	down	0.011104671	0.04332657	MBNL3
ENSG00000077063.11_8	200	84	200	68	90	65	0.473432	0.308453	0.507193	0.139283	0.184039	0.138905	ENSG00000077063	-1.338334839	down	0.000614434	0.003707496	CTTNBP2
ENSG00000077092.19_6	566	254	535	109	124	162	1.817413	1.764555	2.294069	0.421196	0.478087	0.914428	ENSG00000077092	-2.016606262	down	2.46E-13	7.03E-12	RARB
ENSG00000077274.9_5	120	86	145	0	8	23	0.339623	0.523799	0.548697	0	0.027459	0.082579	ENSG00000077274	-3.852603793	down	5.41E-08	7.60E-07	CAPN6
ENSG00000077348.9_5	1099	483	651	1983	2570	1929	11.090753	10.497404	8.791901	24.245728	31.294111	24.610233	ENSG00000077348	1.297366519	up	7.81E-10	1.44E-08	EXOSC5
ENSG00000077514.9_7	2660	1469	2178	718	1369	1096	8.01961	9.204825	8.429543	3.720763	5.549329	6.20465	ENSG00000077514	-1.269725138	down	1.55E-10	3.16E-09	POLD3
ENSG00000077616.11_7	67	89	114	11	20	38	0.208832	0.560737	0.44333	0.035356	0.066831	0.153325	ENSG00000077616	-2.355206916	down	6.77E-05	0.000520923	NAALAD2
ENSG00000077684.16_6	233	125	261	474	882	868	0.427504	0.525271	0.690718	1.036842	1.97442	2.028316	ENSG00000077684	1.572837691	up	2.20E-09	3.75E-08	JADE1
ENSG00000077943.8_5	39	46	31	0	16	0	0.059236	0.150533	0.062901	0	0.029381	0	ENSG00000077943	-3.307255609	down	0.004451861	0.020271252	ITGA8
ENSG00000077984.6_4	9	0	2	84	61	104	0.090335	0	0.021539	1.142467	0.820735	1.482484	ENSG00000077984	4.365271063	up	2.41E-07	3.06E-06	CST7
ENSG00000078053.17_6	613	239	396	124	169	226	2.137834	2.075265	2.288855	0.594081	0.796493	0.995736	ENSG00000078053	-1.507783135	down	2.79E-07	3.49E-06	AMPH
ENSG00000078098.14_7	523	314	448	146	133	231	2.093899	3.170549	2.383605	0.761606	0.643614	1.255128	ENSG00000078098	-1.612134161	down	1.11E-08	1.73E-07	FAP
ENSG00000078114.18_5	53	16	39	241	199	308	0.090289	0.037573	0.056245	0.778663	0.367861	0.757541	ENSG00000078114	2.588103354	up	2.27E-10	4.52E-09	NEBL
ENSG00000078295.17_5	95	38	56	25	5	5	0.095466	0.083047	0.074764	0.038614	0.004894	0.005781	ENSG00000078295	-2.569487901	down	0.001051411	0.005883962	ADCY2
ENSG00000078596.11_5	1060	517	1010	369	369	345	6.643124	7.071018	8.483668	2.77849	2.749768	2.700818	ENSG00000078596	-1.486366211	down	8.61E-12	2.05E-10	ITM2A
ENSG00000078725.13_5	190	138	137	27	20	27	0.688739	0.938131	0.578809	0.096489	0.161748	0.211469	ENSG00000078725	-2.94875396	down	4.92E-11	1.07E-09	BRINP1
ENSG00000078900.15_8	320	92	154	42	54	122	0.618906	0.382604	0.396595	0.097321	0.123781	0.297199	ENSG00000078900	-1.601578238	down	0.000530604	0.003249001	TP73
ENSG00000078902.16_6	642	295	708	1453	1887	1991	2.131113	1.830278	2.793394	5.348392	8.251526	7.828361	ENSG00000078902	1.458927862	up	7.98E-13	2.12E-11	TOLLIP
ENSG00000079215.14_5	1759	1014	1858	425	418	400	13.023718	19.754927	13.068095	3.560806	2.501185	2.411831	ENSG00000079215	-2.144945865	down	3.44E-28	3.17E-26	SLC1A3
ENSG00000079263.19_5	6	6	19	40	75	39	0.059113	0.036741	0.108328	0.304055	0.56954	0.301646	ENSG00000079263	2.038690948	up	0.0103053	0.040722205	SP140
ENSG00000079308.19_9	104	38	61	8	32	12	0.174798	0.076773	0.076648	0.009051	0.034876	0.013361	ENSG00000079308	-2.21588455	down	0.001039206	0.005828096	TNS1
ENSG00000079385.22_7	342	168	264	59	60	121	1.910303	1.682569	1.709293	0.373649	0.22682	0.764957	ENSG00000079385	-1.955068816	down	6.39E-08	8.89E-07	CEACAM1
ENSG00000079432.7_7	370	158	234	81	152	130	0.564951	0.416424	0.382468	0.118916	0.223779	0.207258	ENSG00000079432	-1.326605513	down	7.35E-05	0.000559985	CIC
ENSG00000079482.13_6	333	185	242	70	61	64	0.967057	0.934421	0.595318	0.112858	0.096315	0.534798	ENSG00000079482	-2.21812615	down	5.81E-11	1.25E-09	OPHN1
ENSG00000079841.18_5	117	30	52	0	23	18	0.169248	0.104966	0.098083	0	0.066348	0.030936	ENSG00000079841	-2.534858139	down	0.003427051	0.016172036	RIMS1
ENSG00000080200.10_6	256	145	274	55	99	121	0.238068	0.290912	0.341666	0.06161	0.110499	0.142148	ENSG00000080200	-1.57744322	down	8.68E-06	8.13E-05	CRYBG3
ENSG00000080345.18_8	1299	747	1320	381	633	800	1.832898	2.761645	2.488848	0.666964	0.855491	0.941987	ENSG00000080345	-1.177345348	down	1.98E-07	2.54E-06	RIF1
ENSG00000080561.13_4	60	64	67	18	30	33	0.226942	0.475863	0.380805	0.076639	0.124717	0.207674	ENSG00000080561	-1.601874115	down	0.005861392	0.025530252	MID2
ENSG00000080573.7_5	46	6	14	0	0	0	0.074498	0.020617	0.030053	0	0	0	ENSG00000080573	-7.020060131	down	6.67E-05	0.000513943	COL5A3
ENSG00000080603.17_7	649	396	331	187	151	73	0.685168	0.732049	0.541479	0.205062	0.158	0.14379	ENSG00000080603	-1.997996948	down	1.38E-07	1.82E-06	SRCAP
ENSG00000080644.16_8	66	33	24	0	10	5	0.220153	0.226928	0.212559	0	0.036564	0.018718	ENSG00000080644	-3.371265241	down	0.000588018	0.003561753	CHRNA3
ENSG00000081051.8_5	55	41	42	321	250	206	0.751525	1.214968	0.386999	5.369201	4.075603	3.257484	ENSG00000081051	2.221018617	up	2.24E-08	3.32E-07	AFP
ENSG00000081059.20_5	127	112	174	37	82	92	0.345446	0.851724	0.650366	0.116012	0.252448	0.330735	ENSG00000081059	-1.305155203	down	0.002711895	0.013314117	TCF7
ENSG00000081138.14_5	44	19	28	0	9	0	0.03609	0.033375	0.098829	0	0.008338	0	ENSG00000081138	-3.630727304	down	0.003482592	0.016388873	CDH7
ENSG00000081189.16_9	250	250	421	78	76	174	0.975952	2.294699	2.51339	0.200003	0.389475	0.675609	ENSG00000081189	-1.817893982	down	1.78E-06	1.93E-05	MEF2C
ENSG00000081479.15_8	7	14	8	0	0	0	0.003975	0.019231	0.026589	0	0	0	ENSG00000081479	-6.162767651	down	0.002714257	0.013322945	LRP2
ENSG00000081721.12_4	1032	412	725	2284	2127	1980	8.084125	6.739278	7.747597	21.798351	20.073967	19.2428	ENSG00000081721	1.349582134	up	1.28E-10	2.62E-09	DUSP12
ENSG00000081913.14_5	135	111	79	34	43	65	0.276731	0.463229	0.200074	0.064822	0.081425	0.130436	ENSG00000081913	-1.550079722	down	0.001456146	0.007824341	PHLPP1
ENSG00000082146.13_6	141	36	143	263	358	440	0.780757	0.422913	1.200516	1.490526	2.077037	2.69379	ENSG00000082146	1.53457806	up	2.73E-05	0.000228552	STRADB
ENSG00000082175.15_5	9	17	0	0	0	0	0.040353	0.02665	0	0	0	0	ENSG00000082175	-6.102315177	down	0.00967999	0.038643019	PGR
ENSG00000082438.17_9	111	47	111	27	23	41	0.509842	0.322171	0.507628	0.033512	0.029592	0.053108	ENSG00000082438	-1.790056765	down	0.00066943	0.003999823	COBLL1
ENSG00000082641.16_7	767	450	814	1873	1886	2493	1.643648	2.01554	2.260456	4.72425	4.833785	6.546929	ENSG00000082641	1.360223388	up	2.59E-13	7.38E-12	NFE2L1
ENSG00000082996.19_7	3695	2463	3797	1663	2083	2242	14.87455	20.564178	20.785172	7.931681	10.313094	12.760998	ENSG00000082996	-1.020051374	down	5.86E-11	1.25E-09	RNF13
ENSG00000083223.18_5	354	290	544	163	254	245	0.666984	1.346081	1.765685	0.421233	0.593932	0.555114	ENSG00000083223	-1.144042717	down	7.09E-05	0.000542997	TUT7
ENSG00000083444.17_5	15959	7292	10496	5754	5384	6461	54.663849	53.55579	47.817467	23.605646	22.016914	27.698006	ENSG00000083444	-1.176484084	down	9.46E-12	2.25E-10	PLOD1
ENSG00000083457.12_5	3513	946	2268	6660	6842	5081	51.42775	29.893393	44.296391	118.974953	121.685242	91.511238	ENSG00000083457	1.303699092	up	1.03E-07	1.39E-06	ITGAE
ENSG00000083857.14_7	847	515	1035	178	316	321	1.371562	1.303468	2.009008	0.199181	0.728601	0.468147	ENSG00000083857	-1.836624659	down	8.23E-14	2.50E-12	FAT1
ENSG00000084072.17_5	5336	2273	3808	11887	12044	9739	40.910706	22.063601	40.014374	116.387466	83.474258	80.972557	ENSG00000084072	1.343913681	up	6.23E-13	1.69E-11	PPIE
ENSG00000084463.8_9	2209	1065	1596	470	1081	982	4.931935	5.645271	4.885741	1.338389	2.898309	2.752766	ENSG00000084463	-1.223566928	down	2.52E-07	3.19E-06	WBP11
ENSG00000084623.11_3	26821	11994	19379	42528	52521	47615	187.904953	179.468719	181.051788	360.966644	444.092712	419.112732	ENSG00000084623	1.055459568	up	7.11E-12	1.71E-10	EIF3I
ENSG00000085117.12_6	31342	18306	23578	3540	4806	4133	147.138931	191.879608	152.509415	20.317739	27.192804	24.256828	ENSG00000085117	-2.832231272	down	9.83E-77	4.22E-74	CD82
ENSG00000085231.14_6	3944	1758	2853	14121	14668	13266	28.351488	27.081789	30.857857	122.080688	132.999878	118.301567	ENSG00000085231	2.069942618	up	1.60E-34	1.87E-32	AK6
ENSG00000085662.14_5	42459	22363	33353	77377	79132	82905	312.806335	354.872284	328.340546	688.082947	700.732605	772.664856	ENSG00000085662	1.034430505	up	6.14E-13	1.67E-11	AKR1B1
ENSG00000085721.13_5	373	185	441	483	1040	901	1.035033	1.083763	1.598449	1.796248	3.682995	3.1759	ENSG00000085721	1.015578841	up	0.000183636	0.001277174	RRN3
ENSG00000085733.16_4	38963	15183	28097	139374	106692	86185	177.322311	104.527405	191.456482	843.386353	584.374573	340.830597	ENSG00000085733	1.828998616	up	3.81E-16	1.43E-14	CTTN
ENSG00000086062.12_3	18571	13550	17771	57125	53203	41323	44.473938	70.07589	56.9655	165.968216	153.531036	125.026688	ENSG00000086062	1.328318858	up	4.68E-12	1.14E-10	B4GALT1
ENSG00000086300.16_5	1167	784	850	515	474	673	5.163433	7.483043	4.695832	2.520141	2.735502	4.018859	ENSG00000086300	-1.049401206	down	3.37E-06	3.46E-05	SNX10
ENSG00000086475.15_5	414	253	394	874	1015	1030	1.539593	1.680811	1.904398	3.473296	4.098145	4.244174	ENSG00000086475	1.189036436	up	1.89E-09	3.30E-08	SEPHS1
ENSG00000086570.12_6	270	147	263	9	10	0	0.186556	0.221872	0.284532	0.007267	0.008141	0	ENSG00000086570	-5.391192157	down	3.20E-22	1.96E-20	FAT2
ENSG00000087074.8_5	1026	444	623	7562	15565	13418	4.478827	4.260932	3.636486	39.656803	80.823875	72.981812	ENSG00000087074	3.859827822	up	1.44E-72	5.38E-70	PPP1R15A
ENSG00000087076.9_6	96	23	78	253	218	306	1.073918	0.461998	1.051674	3.28465	2.644291	4.286081	ENSG00000087076	1.804851173	up	6.22E-06	6.03E-05	HSD17B14
ENSG00000087086.15_5	1685566	751564	1209104	2753987	2829755	3592237	19470.23828	18736.71875	18673.91406	38592.15625	39386.72266	52422.21484	ENSG00000087086	1.092795273	up	1.03E-11	2.43E-10	FTL
ENSG00000087245.13_7	5974	3863	4904	1720	1769	2406	17.102757	23.866386	18.772955	5.98901	6.101421	8.700146	ENSG00000087245	-1.612664322	down	5.56E-21	3.16E-19	MMP2
ENSG00000087250.9_3	21	14	40	4	1	3	0.471378	0.622934	1.249881	0.030448	0.002607	0.021868	ENSG00000087250	-3.443179718	down	0.002048049	0.010479992	MT3
ENSG00000087303.18_6	105	33	86	8	29	9	0.227188	0.195061	0.400396	0.017779	0.124072	0.026604	ENSG00000087303	-2.504770476	down	0.0002154	0.00146917	NID2
ENSG00000088002.12_3	127	92	44	54	17	35	0.876112	1.361993	0.39713	0.450714	0.138195	0.302192	ENSG00000088002	-1.597643562	down	0.010390156	0.041013316	SULT2B1
ENSG00000088340.17_7	260	90	177	102	31	99	0.723295	0.694625	0.678806	0.298886	0.079731	0.567984	ENSG00000088340	-1.359290872	down	0.004778616	0.02151015	FER1L4
ENSG00000088356.6_5	5710	2599	4145	14331	16827	12810	29.350481	28.831102	28.488148	89.374359	104.235191	83.197792	ENSG00000088356	1.58765313	up	1.04E-19	5.22E-18	PDRG1
ENSG00000088386.17_6	44	42	65	5	0	0	0.140116	0.286559	0.292273	0.016514	0	0	ENSG00000088386	-5.138821618	down	1.32E-06	1.47E-05	SLC15A1
ENSG00000088726.16_7	236	78	153	16	21	29	1.367195	1.145978	1.121609	0.089587	0.135874	0.17977	ENSG00000088726	-3.042007975	down	1.02E-10	2.12E-09	TMEM40
ENSG00000088756.12_4	195	65	120	72	80	48	0.714953	0.25485	0.311764	0.17596	0.373496	0.109014	ENSG00000088756	-1.117457363	down	0.013164479	0.049671921	ARHGAP28
ENSG00000088826.18_5	487	231	428	1705	2399	2252	2.529213	2.251801	2.626088	9.437689	13.504652	13.346357	ENSG00000088826	2.220507619	up	3.24E-33	3.65E-31	SMOX
ENSG00000089009.15_6	21269	8333	14167	33774	39709	41469	204.778839	175.085403	183.690155	392.93808	462.787933	506.739899	ENSG00000089009	1.168327491	up	4.64E-12	1.14E-10	RPL6
ENSG00000089041.17_5	68	72	155	211	224	301	0.133754	0.304586	0.645855	0.662428	0.530392	0.912468	ENSG00000089041	1.021206894	up	0.008846005	0.035908848	P2RX7
ENSG00000089060.11_6	261	121	260	133	84	156	1.302305	0.866319	1.505032	0.558374	0.411489	0.605936	ENSG00000089060	-1.004359089	down	0.005642269	0.024682315	SLC8B1
ENSG00000089127.13_7	39858	11880	18986	1042	725	968	219.355453	141.397018	138.136154	6.978655	4.784564	6.674578	ENSG00000089127	-4.866236223	down	1.71E-85	8.96E-83	OAS1
ENSG00000089157.16_7	33575	12397	19540	86554	79607	69690	319.016541	229.479858	247.362427	913.806213	933.532288	895.810913	ENSG00000089157	1.649147692	up	1.08E-15	3.87E-14	RPLP0
ENSG00000089248.7_5	16406	6889	11820	38017	36820	37552	102.249237	92.963188	98.302032	292.089905	281.692078	298.903442	ENSG00000089248	1.45947918	up	5.74E-18	2.47E-16	ERP29
ENSG00000089356.18_6	363	155	256	14	0	22	5.771358	6.033323	2.965079	0.115195	0	0.18707	ENSG00000089356	-4.641895751	down	0.000142151	0.001015273	FXYD3
ENSG00000089472.16_7	866	495	648	177	181	222	1.867916	2.585889	2.021516	0.358066	0.461847	0.588398	ENSG00000089472	-2.063890179	down	9.15E-19	4.23E-17	HEPH
ENSG00000089693.10_5	30619	15400	17192	8944	10250	9369	158.520737	173.415405	122.172447	57.402451	65.926331	61.269722	ENSG00000089693	-1.405520776	down	1.74E-14	5.65E-13	MLF2
ENSG00000090013.11_6	18136	7315	13800	45045	31593	31016	229.170715	198.981094	232.873642	690.524414	486.410645	500.878204	ENSG00000090013	1.266443958	up	5.79E-09	9.32E-08	BLVRB
ENSG00000090061.17_6	713	405	505	160	233	113	2.762975	7.719676	5.867805	1.225385	2.36959	1.367938	ENSG00000090061	-1.948316138	down	7.46E-11	1.58E-09	CCNK
ENSG00000090263.16_7	2032	917	1357	5199	4630	3760	21.494045	20.189646	17.906759	76.050079	61.20319	53.822758	ENSG00000090263	1.439595185	up	7.93E-12	1.89E-10	MRPS33
ENSG00000090487.11_5	393	271	655	992	1162	1472	2.277593	3.704733	4.88534	6.924636	8.195332	10.463293	ENSG00000090487	1.191676368	up	1.57E-06	1.71E-05	SPG21
ENSG00000090530.10_6	386	261	467	693	1143	1129	1.409495	1.964217	2.255281	2.468776	4.095293	4.141388	ENSG00000090530	1.12054976	up	8.24E-07	9.53E-06	P3H2
ENSG00000090621.14_8	256	130	277	536	415	612	0.877349	1.142051	1.267503	2.284595	1.640021	2.728754	ENSG00000090621	1.005083	up	0.000253043	0.001694491	PABPC4
ENSG00000090857.14_5	1141	426	928	1926	2471	2307	1.341912	1.219034	1.602403	2.749623	3.551255	3.500105	ENSG00000090857	1.208746371	up	9.58E-10	1.74E-08	PDPR
ENSG00000090861.16_5	2532	1533	2405	19734	25365	24173	7.40611	9.681726	9.502357	70.359314	89.823784	89.809418	ENSG00000090861	3.146367872	up	8.98E-117	9.63E-114	AARS1
ENSG00000090924.15_6	319	126	263	69	67	106	0.399913	0.381068	0.493266	0.102537	0.100907	0.16737	ENSG00000090924	-1.774708144	down	5.90E-07	7.03E-06	PLEKHG2
ENSG00000090971.5_4	330	105	319	700	561	657	2.474841	1.683605	3.176515	6.332117	5.058668	6.230857	ENSG00000090971	1.169220185	up	6.54E-05	0.000505152	NAT14
ENSG00000091129.21_10	133	110	238	58	104	126	0.19935	0.355975	0.645528	0.103183	0.187925	0.237104	ENSG00000091129	-1.044624689	down	0.011268084	0.043820244	NRCAM
ENSG00000091527.15_4	390	140	380	538	995	1123	2.205084	1.272962	2.65054	3.27096	5.505106	4.644058	ENSG00000091527	1.3109173	up	2.57E-06	2.69E-05	CDV3
ENSG00000091622.16_6	64	26	22	283	245	463	0.107595	0.075959	0.10681	0.586861	0.423508	0.884531	ENSG00000091622	2.891947205	up	4.98E-12	1.22E-10	PITPNM3
ENSG00000091651.9_5	1474	868	1479	2560	3673	3160	9.665196	11.764367	12.707076	19.747255	30.972185	25.942879	ENSG00000091651	1.026863045	up	4.48E-10	8.54E-09	ORC6
ENSG00000091656.19_9	1461	863	1285	531	715	817	1.188761	1.350868	1.278016	0.511637	0.618999	0.751824	ENSG00000091656	-1.088862024	down	5.47E-09	8.85E-08	ZFHX4
ENSG00000091732.17_6	1365	609	1329	2702	2800	2547	8.620978	7.723735	10.939814	19.81493	20.018143	18.020418	ENSG00000091732	1.066376443	up	2.10E-08	3.12E-07	ZC3HC1
ENSG00000091844.8_6	222	173	254	383	614	744	0.27958	0.473098	0.431575	0.58859	0.935567	1.190956	ENSG00000091844	1.105402266	up	4.55E-05	0.000361136	RGS17
ENSG00000091879.14_4	1576	860	1173	211	388	320	3.028593	4.121412	3.281755	0.473704	0.909643	0.778832	ENSG00000091879	-2.2566512	down	1.26E-24	9.10E-23	ANGPT2
ENSG00000091972.18_8	13	0	33	0	0	0	0.057594	0	0.206657	0	0	0	ENSG00000091972	-6.48047291	down	0.002815176	0.013726962	CD200
ENSG00000091986.15_8	1500	896	1433	564	831	823	1.833873	2.431467	3.680602	0.727011	1.472283	0.96753	ENSG00000091986	-1.067932845	down	5.79E-09	9.32E-08	CCDC80
ENSG00000092068.20_7	1640	797	1407	86	111	101	4.084963	4.346677	4.534097	0.256962	0.332991	0.35435	ENSG00000092068	-3.935922866	down	2.95E-76	1.24E-73	SLC7A8
ENSG00000092096.17_6	296	181	316	68	43	128	1.342886	1.702206	1.92388	0.367967	0.222841	0.811016	ENSG00000092096	-2.00388187	down	3.62E-07	4.47E-06	SLC22A17
ENSG00000092199.17_9	39756	17372	28625	86249	96834	90490	240.431885	217.097366	219.335983	605.962402	698.613403	705.201599	ENSG00000092199	1.44330899	up	4.50E-20	2.37E-18	HNRNPC
ENSG00000092208.17_6	347	183	335	585	868	671	2.735949	2.906757	3.414042	5.240451	7.72614	6.539087	ENSG00000092208	1.038715502	up	7.11E-06	6.80E-05	GEMIN2
ENSG00000092421.16_7	234	96	215	53	41	57	0.363703	0.494949	0.419432	0.092893	0.07222	0.11916	ENSG00000092421	-2.062909747	down	2.35E-07	2.99E-06	SEMA6A
ENSG00000092445.12_5	298	131	267	444	587	641	0.382117	0.552456	0.527924	0.809302	1.270173	2.637056	ENSG00000092445	1.021830779	up	3.74E-05	0.000304176	TYRO3
ENSG00000092621.12_5	11332	5199	9320	65075	75893	70397	57.886234	54.91877	63.566154	341.220428	419.055359	426.886902	ENSG00000092621	2.796740654	up	2.58E-79	1.17E-76	PHGDH
ENSG00000092758.18_9	15	14	14	0	0	0	0.059882	0.119873	0.072151	0	0	0	ENSG00000092758	-6.616702606	down	0.000329617	0.002142831	COL9A3
ENSG00000092964.18_7	2627	1506	1991	4907	5022	5521	5.761055	7.054335	6.080036	13.088614	13.218774	15.24124	ENSG00000092964	1.067767307	up	2.16E-11	4.87E-10	DPYSL2
ENSG00000093010.14_6	6547	1688	2965	10726	8507	9402	37.542553	21.008062	23.953581	88.640221	65.048347	75.35659	ENSG00000093010	1.196006313	up	3.72E-06	3.79E-05	COMT
ENSG00000094963.14_4	5	19	8	0	0	0	0.051262	0.240168	0.020086	0	0	0	ENSG00000094963	-6.382127671	down	0.001413226	0.007619736	FMO2
ENSG00000095203.14_4	36	34	82	252	253	317	0.084787	0.159894	0.267709	0.742773	0.718155	0.979431	ENSG00000095203	2.157790034	up	7.15E-08	9.85E-07	EPB41L4B
ENSG00000095303.17_8	127	73	83	8	0	4	0.252876	0.315477	0.255974	0.019159	0	0.00763	ENSG00000095303	-4.787032931	down	2.05E-10	4.12E-09	PTGS1
ENSG00000095380.11_4	8391	3004	5959	30734	27794	25676	71.218964	54.921516	67.498466	318.183472	285.666626	276.787445	ENSG00000095380	2.087479733	up	1.25E-25	9.84E-24	NANS
ENSG00000095587.9_5	339	105	245	12	26	77	0.5028	0.336231	0.578549	0.020772	0.0453	0.143412	ENSG00000095587	-2.830828427	down	4.98E-08	7.04E-07	TLL2
ENSG00000096401.8_4	4133	2139	3861	1207	1462	1519	6.662592	7.441481	8.320928	2.360159	2.838408	3.093467	ENSG00000096401	-1.527055769	down	6.29E-23	4.22E-21	CDC5L
ENSG00000096696.14_5	251	200	191	75	104	140	0.259746	0.451848	0.265079	0.093462	0.129121	0.198016	ENSG00000096696	-1.348433649	down	0.000153999	0.001089347	DSP
ENSG00000096717.12_4	43	27	54	89	120	151	0.105306	0.139228	0.194443	0.26204	0.43619	0.467286	ENSG00000096717	1.259918163	up	0.006592362	0.028155002	SIRT1
ENSG00000096746.17_3	1561	737	1118	3888	4076	3518	10.557054	11.220601	9.160821	36.590816	30.051899	25.074379	ENSG00000096746	1.513764774	up	8.66E-17	3.41E-15	HNRNPH3
ENSG00000099139.14_7	119	76	179	34	63	101	0.27743	0.273037	0.65747	0.065193	0.160425	0.310419	ENSG00000099139	-1.207957074	down	0.010399456	0.04103309	PCSK5
ENSG00000099204.20_8	1219	992	1582	548	504	851	1.951103	3.135431	4.71255	0.912493	0.999543	1.750105	ENSG00000099204	-1.296742336	down	3.53E-08	5.09E-07	ABLIM1
ENSG00000099260.11_5	48	66	55	0	0	0	0.220103	0.584132	0.309784	0	0	0	ENSG00000099260	-8.642600726	down	5.89E-10	1.11E-08	PALMD
ENSG00000099797.15_6	103564	47542	59457	25614	29478	25561	908.465576	916.13855	701.886658	273.538788	310.703705	282.565796	ENSG00000099797	-1.628016235	down	1.88E-19	9.16E-18	TECR
ENSG00000099800.8_6	10422	4684	7037	25041	28278	20623	63.027943	61.111782	56.881107	183.703781	212.080643	157.526245	ENSG00000099800	1.510634516	up	4.06E-16	1.51E-14	TIMM13
ENSG00000099812.9_6	0	0	16	38	76	103	0	0	0.074045	0.158058	0.318973	0.452444	ENSG00000099812	3.546759499	up	0.000618715	0.003729513	MISP
ENSG00000099849.15_6	336	115	249	371	496	777	1.944569	1.261306	1.981436	3.015809	3.716606	5.785378	ENSG00000099849	1.001111714	up	0.000860683	0.004973419	RASSF7
ENSG00000099860.9_7	138	69	109	144	411	394	1.138499	1.27595	1.077585	1.360135	4.600348	3.855271	ENSG00000099860	1.293215218	up	0.000556008	0.003385239	GADD45B
ENSG00000099875.14_6	293	132	247	1720	1724	2406	1.288104	1.126369	1.438108	10.202065	8.783583	16.155445	ENSG00000099875	2.880159583	up	1.87E-43	3.09E-41	MKNK2
ENSG00000099901.17_8	3427	1594	3416	5449	7653	6942	35.512566	33.991096	46.704063	67.558487	94.795944	92.813164	ENSG00000099901	1.008256775	up	1.97E-09	3.41E-08	RANBP1
ENSG00000099910.17_6	381	177	258	95	160	161	1.715004	1.584833	1.418018	0.456137	0.764737	0.819825	ENSG00000099910	-1.237245374	down	7.90E-05	0.000597325	KLHL22
ENSG00000099954.18_5	63	57	110	349	744	321	0.165092	0.135387	0.152017	0.446196	1.160144	0.43014	ENSG00000099954	2.318686216	up	8.00E-10	1.47E-08	CECR2
ENSG00000099991.18_8	1113	618	904	312	432	544	4.236785	2.893559	3.603083	0.514005	0.730775	2.067325	ENSG00000099991	-1.313553797	down	1.21E-09	2.16E-08	CABIN1
ENSG00000099998.17_7	349	336	516	87	55	100	1.580266	3.005663	3.232886	0.391699	0.502014	0.497794	ENSG00000099998	-2.611282098	down	1.97E-14	6.36E-13	GGT5
ENSG00000100031.19_7	235	63	144	31	42	38	1.055427	0.738755	1.032909	0.384712	0.232423	0.207346	ENSG00000100031	-2.182531862	down	2.30E-06	2.43E-05	GGT1
ENSG00000100058.12_4	1935	704	1555	3549	4121	2649	15.20419	11.448288	14.918259	33.54845	36.911209	25.206017	ENSG00000100058	1.103208998	up	1.02E-06	1.16E-05	CRYBB2P1
ENSG00000100065.15_7	122	107	270	423	352	631	0.590914	0.563069	0.881761	1.25436	1.055956	3.686818	ENSG00000100065	1.220886058	up	0.000505137	0.003119299	CARD10
ENSG00000100079.7_5	29	20	17	4	0	0	0.507015	0.70778	0.383099	0.069902	0	0	ENSG00000100079	-4.244334428	down	0.002279701	0.01148119	LGALS2
ENSG00000100105.18_6	101	52	80	191	170	198	0.26697	0.345617	0.418723	0.879626	0.610841	0.820738	ENSG00000100105	1.017099603	up	0.005395567	0.023766069	PATZ1
ENSG00000100122.7_6	50	9	8	0	0	0	0.476542	0.173826	0.09821	0	0	0	ENSG00000100122	-7.069027397	down	5.92E-05	0.000460872	CRYBB1
ENSG00000100138.15_7	10666	4074	7869	26353	23764	20112	79.485466	66.42907	76.820297	233.063919	208.162277	185.886871	ENSG00000100138	1.440278044	up	7.50E-13	2.00E-11	SNU13
ENSG00000100139.13_7	780	383	581	1342	1811	1733	1.664711	1.765544	1.658654	4.084875	4.696883	4.724723	ENSG00000100139	1.228176772	up	2.94E-11	6.55E-10	MICALL1
ENSG00000100154.14_8	731	296	629	225	261	425	0.622739	0.678405	0.829106	0.232004	0.27713	0.471936	ENSG00000100154	-1.099733804	down	5.86E-05	0.000456394	TTC28
ENSG00000100162.15_5	2800	1082	1797	4355	5878	3539	29.734318	25.262424	25.969635	57.702904	76.435135	47.912346	ENSG00000100162	1.061871786	up	1.37E-06	1.52E-05	CENPM
ENSG00000100196.11_4	14223	8387	11803	2262	2255	2900	88.309219	109.727875	96.702652	17.51862	17.145893	22.692196	ENSG00000100196	-2.486066502	down	4.31E-58	1.17E-55	KDELR3
ENSG00000100211.10_3	1753	866	1316	3410	3087	3140	15.226666	16.666021	15.305655	38.212227	34.787685	36.615005	ENSG00000100211	1.056165229	up	6.92E-09	1.11E-07	CBY1
ENSG00000100219.16_8	954	709	1330	3901	5278	6142	4.770837	7.665414	8.854286	26.95537	36.580009	43.988743	ENSG00000100219	2.063624994	up	1.36E-26	1.13E-24	XBP1
ENSG00000100221.10_5	507	195	378	754	836	998	1.396451	1.155954	1.393324	2.517655	2.772269	3.470877	ENSG00000100221	1.036367974	up	6.10E-06	5.93E-05	JOSD1
ENSG00000100225.18_6	1384	877	1413	2856	3516	4316	7.103265	9.57551	9.977937	17.447258	20.993649	26.784275	ENSG00000100225	1.257534479	up	5.94E-14	1.83E-12	FBXO7
ENSG00000100234.11_3	524	331	617	4045	3873	6246	1.14362	1.557757	1.800665	10.724678	10.200321	17.246569	ENSG00000100234	2.994820161	up	2.67E-49	5.44E-47	TIMP3
ENSG00000100243.21_6	6438	2904	4929	2020	2281	2946	23.014874	22.560541	23.235558	8.908215	10.957925	13.127388	ENSG00000100243	-1.222153785	down	8.18E-13	2.17E-11	CYB5R3
ENSG00000100258.18_7	282	169	256	85	91	224	1.066316	1.372843	1.378321	0.386216	0.554376	1.069903	ENSG00000100258	-1.119123025	down	0.00337242	0.015969101	LMF2
ENSG00000100290.3_4	676	235	287	858	1214	1145	7.144025	5.360307	4.054677	11.005308	15.475275	15.297868	ENSG00000100290	1.196428635	up	8.55E-06	8.02E-05	BIK
ENSG00000100292.17_4	547	343	441	6295	5769	8387	3.612169	4.840973	3.809426	49.506405	45.030186	68.742645	ENSG00000100292	3.661242805	up	2.91E-88	1.72E-85	HMOX1
ENSG00000100296.13_5	598	357	484	1083	1305	1408	1.726043	2.701877	1.49977	5.176702	6.361426	7.557666	ENSG00000100296	1.120619841	up	2.54E-09	4.33E-08	THOC5
ENSG00000100297.16_5	3490	1592	2585	1157	1186	1660	10.103459	9.958388	9.95353	4.024204	4.077509	6.016478	ENSG00000100297	-1.182270354	down	2.36E-10	4.67E-09	MCM5
ENSG00000100302.7_4	88	100	154	26	29	65	0.254402	0.628688	0.59938	0.091639	0.101666	0.236047	ENSG00000100302	-1.859170982	down	0.000314169	0.002052009	RASD2
ENSG00000100314.4_4	8	10	7	45	86	71	0.024056	0.059751	0.02601	0.16187	0.310833	0.268678	ENSG00000100314	2.638219932	up	0.000225507	0.001529184	CABP7
ENSG00000100316.16_7	37165	15159	24929	90204	89991	91815	288.6586	256.086731	257.940155	849.652039	842.324402	900.000549	ENSG00000100316	1.59709504	up	1.10E-20	6.08E-19	RPL3
ENSG00000100319.13_5	2084	1010	1348	6161	6504	5266	22.175463	23.027105	19.065939	79.480576	83.385971	70.743057	ENSG00000100319	1.772806078	up	8.87E-21	4.94E-19	ZMAT5
ENSG00000100330.16_5	80	61	242	278	314	346	0.08945	0.144186	0.363923	0.385557	0.453664	0.488006	ENSG00000100330	1.053361784	up	0.010628361	0.04177197	MTMR3
ENSG00000100336.17_5	30	48	30	3	0	16	0.087523	0.298495	0.116498	0.009847	0	0.059002	ENSG00000100336	-2.972444288	down	0.004722758	0.02128713	APOL4
ENSG00000100344.11_5	144	62	95	30	24	38	0.682216	0.527661	0.525248	0.131646	0.105277	0.218201	ENSG00000100344	-1.943337307	down	0.000100209	0.000741517	PNPLA3
ENSG00000100351.17_5	25	13	12	73	77	85	0.06111	0.067312	0.038784	0.271236	0.261902	0.294163	ENSG00000100351	1.96456938	up	0.001157883	0.006403896	GRAP2
ENSG00000100359.21_5	940	493	900	115	411	249	3.256773	5.744163	4.288281	0.561487	1.997693	1.214703	ENSG00000100359	-1.878961712	down	3.50E-09	5.82E-08	SGSM3
ENSG00000100401.19_5	2775	991	2278	7032	9577	8397	9.102399	6.88256	9.588683	26.386255	34.232323	33.114204	ENSG00000100401	1.836938579	up	3.47E-22	2.11E-20	RANGAP1
ENSG00000100410.8_5	1746	661	1284	4117	4409	3490	16.709177	13.694233	16.423941	48.03994	50.884655	42.482121	ENSG00000100410	1.498569943	up	1.54E-13	4.52E-12	PHF5A
ENSG00000100416.15_6	1141	657	1011	2321	2722	2882	6.722478	8.11541	7.849916	16.710146	19.555801	22.655985	ENSG00000100416	1.228198497	up	8.08E-15	2.72E-13	TRMU
ENSG00000100417.12_5	1919	885	1547	4693	5680	4993	14.974488	15.197244	16.663982	44.353642	53.904522	49.168896	ENSG00000100417	1.582772702	up	2.95E-22	1.81E-20	PMM1
ENSG00000100422.14_5	398	293	575	825	1036	1307	0.90089	1.431131	1.741161	2.265756	2.826431	3.73972	ENSG00000100422	1.036114585	up	9.80E-06	9.08E-05	CERK
ENSG00000100425.18_5	118	53	96	206	240	299	0.277591	0.22805	0.302538	0.501288	0.579644	0.757117	ENSG00000100425	1.233711199	up	0.000226375	0.00153419	BRD1
ENSG00000100433.15_6	206	35	89	12	10	12	0.276182	0.151537	0.159204	0.019179	0.01586	0.019566	ENSG00000100433	-3.412244557	down	5.75E-08	8.06E-07	KCNK10
ENSG00000100441.10_6	503	217	367	635	988	965	0.782405	0.86522	0.768399	1.502803	1.766054	2.228847	ENSG00000100441	1.000847936	up	1.08E-05	9.95E-05	KHNYN
ENSG00000100442.11_6	14734	7600	12506	31201	34016	29418	114.787727	130.313843	130.85582	294.117432	318.644348	289.486145	ENSG00000100442	1.198567344	up	3.06E-15	1.06E-13	FKBP3
ENSG00000100473.18_6	13	16	4	0	0	0	0.200904	0.119454	0.024208	0	0	0	ENSG00000100473	-6.334584891	down	0.001584331	0.008392761	COCH
ENSG00000100505.13_4	261	152	202	62	63	56	0.766041	0.750949	0.566606	0.220941	0.154642	0.148608	ENSG00000100505	-2.027657368	down	1.36E-08	2.08E-07	TRIM9
ENSG00000100532.12_5	540	448	607	1309	1464	1208	2.869874	5.345747	4.333503	8.455154	9.517649	8.008591	ENSG00000100532	1.021837042	up	1.84E-06	1.97E-05	CGRRF1
ENSG00000100575.14_5	559	262	577	1586	1713	1512	6.170321	5.089977	7.84881	21.467392	25.275223	20.372364	ENSG00000100575	1.557265035	up	3.91E-14	1.22E-12	TIMM9
ENSG00000100580.8_5	314	316	426	137	199	250	0.406176	0.883345	0.738314	0.214596	0.310769	0.407825	ENSG00000100580	-1.192812633	down	0.000102924	0.000759464	TMED8
ENSG00000100591.8_6	4069	1480	2794	9633	8248	8580	30.893198	24.487087	28.659426	90.475029	76.002602	82.439934	ENSG00000100591	1.47016493	up	2.90E-13	8.21E-12	AHSA1
ENSG00000100628.12_5	26	8	42	0	0	0	0.092871	0.060797	0.201528	0	0	0	ENSG00000100628	-7.2814933	down	1.19E-05	0.000107872	ASB2
ENSG00000100644.17_8	130806	66607	64209	14153	36215	30421	340.655548	376.031586	225.721191	46.900318	114.857513	100.882874	ENSG00000100644	-2.000457139	down	1.67E-15	5.91E-14	HIF1A
ENSG00000100647.8_4	1059	808	1323	426	471	561	2.077589	3.248653	3.440312	0.964121	1.05839	1.321942	ENSG00000100647	-1.421311675	down	1.13E-11	2.66E-10	SUSD6
ENSG00000100664.11_5	73844	34648	59243	143465	144763	118521	308.427582	326.782227	303.17215	672.661865	606.092346	554.363403	ENSG00000100664	1.052697067	up	8.36E-10	1.53E-08	EIF5
ENSG00000100731.16_6	361	262	529	167	220	274	0.403884	0.663569	0.822381	0.210217	0.226126	0.341879	ENSG00000100731	-1.087467501	down	0.000150515	0.001066937	PCNX1
ENSG00000100739.11_5	257	160	247	103	133	58	1.990638	2.975305	2.545146	0.960601	1.230188	0.591338	ENSG00000100739	-1.433403896	down	0.000166234	0.00116819	BDKRB1
ENSG00000100814.18_5	365	148	292	747	795	779	2.833628	2.112927	3.121232	6.545791	7.117514	7.413122	ENSG00000100814	1.307091736	up	2.25E-08	3.34E-07	CCNB1IP1
ENSG00000100852.13_6	2127	1399	1792	583	1003	1559	2.322975	4.094796	2.523267	0.900173	1.26651	2.066481	ENSG00000100852	-1.080387459	down	1.37E-05	0.000122608	ARHGAP5
ENSG00000100867.15_4	5454	2196	3783	920	1150	1037	31.348322	27.236591	28.799887	6.762352	8.010426	7.550883	ENSG00000100867	-2.105991645	down	5.39E-31	5.71E-29	DHRS2
ENSG00000100888.14_8	941	532	801	354	475	460	1.343377	1.864686	1.906177	0.825701	0.833966	0.850526	ENSG00000100888	-1.090749787	down	6.04E-08	8.44E-07	CHD8
ENSG00000100889.12_4	571	222	464	1598	2150	1904	2.665038	2.127569	2.900708	9.089375	12.29258	11.544395	ENSG00000100889	1.94361751	up	1.13E-21	6.61E-20	PCK2
ENSG00000100918.13_9	201	109	252	25	26	62	1.471915	1.370208	3.208937	0.352193	0.38006	0.453905	ENSG00000100918	-2.579232082	down	8.11E-09	1.28E-07	REC8
ENSG00000100938.17_7	1847	933	1599	3091	3828	3767	9.921241	11.264837	11.120248	20.22543	23.649326	25.231834	ENSG00000100938	1.035007951	up	1.94E-11	4.41E-10	GMPR2
ENSG00000100968.14_5	347	218	232	128	160	154	0.898453	1.976273	1.010109	0.3875	0.795956	0.368412	ENSG00000100968	-1.143203256	down	0.000170153	0.001194306	NFATC4
ENSG00000100985.7_3	33	19	79	6	0	0	0.139431	0.169922	0.449555	0.026752	0	0	ENSG00000100985	-4.55510374	down	8.22E-05	0.00061959	MMP9
ENSG00000100994.12_5	10030	5400	7723	18269	18369	23564	24.81535	28.636913	25.37496	54.33408	54.329021	72.849403	ENSG00000100994	1.116537465	up	4.46E-13	1.23E-11	PYGB
ENSG00000101076.16_5	0	0	0	10	12	23	0	0	0	0.017297	0.022271	0.044177	ENSG00000101076	6.021008487	up	0.002152003	0.010912572	HNF4A
ENSG00000101096.20_5	149	68	81	35	43	29	0.215614	0.195955	0.144128	0.056469	0.068815	0.048866	ENSG00000101096	-1.720956332	down	0.000539729	0.003297178	NFATC2
ENSG00000101104.13_3	303	126	239	740	693	793	2.247051	1.587369	1.906394	4.937261	4.920192	6.518615	ENSG00000101104	1.514579067	up	3.87E-10	7.43E-09	PABPC1L
ENSG00000101146.13_5	7226	3402	5488	11421	16381	11982	31.359541	32.144222	32.827564	64.56324	86.325928	66.406578	ENSG00000101146	1.057609821	up	4.61E-10	8.77E-09	RAE1
ENSG00000101150.17_5	4888	3030	4044	9939	13413	13275	21.455761	28.915964	23.802755	53.305878	71.228416	74.247612	ENSG00000101150	1.32639502	up	1.64E-19	8.14E-18	TPD52L2
ENSG00000101182.15_6	139349	58365	101950	277765	262995	239747	1470.460815	1324.928101	1438.528564	3546.135742	3339.916016	3168.200684	ENSG00000101182	1.168574482	up	4.66E-11	1.01E-09	PSMA7
ENSG00000101187.16_5	391	228	246	756	809	1023	1.705099	1.88327	1.326933	3.621229	3.957729	5.147339	ENSG00000101187	1.297481878	up	4.47E-08	6.36E-07	SLCO4A1
ENSG00000101224.17_5	3371	1924	3672	8666	9199	13657	9.584425	11.614687	16.165472	34.476082	31.319664	48.371178	ENSG00000101224	1.54958174	up	4.43E-18	1.94E-16	CDC25B
ENSG00000101246.20_6	3419	1982	2779	6052	8300	7012	17.567968	16.418741	12.86045	35.849823	48.958405	49.671917	ENSG00000101246	1.110243424	up	4.55E-13	1.26E-11	ARFRP1
ENSG00000101255.11_5	494	118	468	18830	27708	32680	2.369	1.218489	3.001454	110.195534	161.009857	198.925629	ENSG00000101255	6.007993932	up	5.53E-123	7.25E-120	TRIB3
ENSG00000101266.19_8	1284	741	1127	2097	2937	2927	2.688241	4.450167	4.106254	4.039126	8.268153	9.535326	ENSG00000101266	1.059752486	up	8.88E-11	1.86E-09	CSNK2A1
ENSG00000101276.17_8	207	93	103	46	10	34	0.760586	0.739848	0.444587	0.172435	0.038974	0.156378	ENSG00000101276	-2.36505997	down	3.08E-05	0.000254353	SLC52A3
ENSG00000101298.15_6	264	158	270	89	63	82	0.474757	0.610522	0.647631	0.194165	0.134563	0.185505	ENSG00000101298	-1.810817977	down	2.11E-07	2.70E-06	SNPH
ENSG00000101307.16_6	12	61	47	15	8	7	0.020732	0.243576	0.14521	0.033081	0.017646	0.034556	ENSG00000101307	-2.435328976	down	0.005881646	0.025593625	SIRPB1
ENSG00000101333.16_4	1110	557	1116	168	377	439	1.948898	2.117643	2.646075	0.351399	0.79233	0.98297	ENSG00000101333	-1.777778432	down	7.06E-11	1.50E-09	PLCB4
ENSG00000101347.10_7	2798	1252	2093	304	441	516	6.650983	6.54968	7.212576	0.992624	1.188709	1.642009	ENSG00000101347	-2.538126481	down	3.83E-37	5.00E-35	SAMHD1
ENSG00000101384.12_6	520	263	495	963	1552	1836	0.994525	1.126684	1.324066	2.023997	3.286294	3.96781	ENSG00000101384	1.498225161	up	9.00E-12	2.14E-10	JAG1
ENSG00000101444.13_6	2440	1419	1844	3480	5324	5440	11.239568	14.3085	11.528242	19.698484	29.896933	32.052006	ENSG00000101444	1.030443162	up	1.98E-09	3.42E-08	AHCY
ENSG00000101447.15_5	768	362	653	299	308	420	3.213583	3.167277	3.641472	1.471037	1.572511	2.204849	ENSG00000101447	-1.040296354	down	8.14E-06	7.69E-05	FAM83D
ENSG00000101457.13_5	207	54	130	313	316	292	1.632308	0.90717	1.370885	3.194213	3.013456	2.934986	ENSG00000101457	1.061864764	up	0.002392243	0.011978976	DNTTIP1
ENSG00000101493.11_6	78	48	76	153	188	224	0.090838	0.119759	0.117611	0.213949	0.267498	0.328016	ENSG00000101493	1.204921938	up	0.001040845	0.005828981	ZNF516
ENSG00000101558.14_6	20564	12870	22445	38296	54068	43639	62.28772	55.904953	74.522255	101.52861	162.274872	153.297745	ENSG00000101558	1.01078239	up	4.99E-11	1.08E-09	VAPA
ENSG00000101639.18_9	288	158	207	76	109	201	0.404337	0.494501	0.365028	0.116065	0.165685	0.368498	ENSG00000101639	-1.055862666	down	0.00456533	0.020684251	CEP192
ENSG00000101670.12_7	528	244	451	47	75	82	1.14339	0.814281	0.930759	0.064965	0.352159	0.185108	ENSG00000101670	-2.83825424	down	2.88E-21	1.66E-19	LIPG
ENSG00000101844.18_5	798	517	967	347	483	473	3.833786	5.058778	5.863434	1.843161	2.645365	2.728292	ENSG00000101844	-1.085042373	down	5.52E-07	6.59E-06	ATG4A
ENSG00000101846.8_4	125	53	74	39	25	41	0.288068	0.209853	0.184502	0.120112	0.057874	0.13415	ENSG00000101846	-1.48595583	down	0.00504739	0.022509662	STS
ENSG00000101849.17_8	479	240	413	754	935	1162	0.682099	0.735845	0.78542	1.64367	2.024934	2.09136	ENSG00000101849	1.072853723	up	4.04E-07	4.94E-06	TBL1X
ENSG00000101856.10_4	5283	3505	3940	1634	2220	2673	28.283064	40.497017	28.240236	10.612652	14.662138	18.079508	ENSG00000101856	-1.273729658	down	4.29E-12	1.06E-10	PGRMC1
ENSG00000101871.15_5	1860	1327	2233	601	831	759	3.464787	4.862661	5.343027	1.235016	1.76921	1.59373	ENSG00000101871	-1.595041534	down	1.20E-17	5.01E-16	MID1
ENSG00000101888.11_3	146	238	221	119	109	138	0.569787	1.918797	1.163151	0.563238	0.511177	0.68035	ENSG00000101888	-1.113521565	down	0.005512202	0.024189539	NXT2
ENSG00000102034.17_4	110	74	158	296	290	391	0.214767	0.308845	0.413089	0.700668	0.681921	0.965121	ENSG00000102034	1.249802623	up	9.87E-05	0.000730749	ELF4
ENSG00000102038.15_6	3334	2129	2613	1116	1796	1859	8.969123	12.524741	9.393096	3.639423	5.832965	6.370602	ENSG00000102038	-1.06502389	down	1.05E-08	1.64E-07	SMARCA1
ENSG00000102048.16_5	408	216	426	44	69	40	2.376527	2.915569	3.546277	0.377111	0.563425	0.260698	ENSG00000102048	-3.028200074	down	8.71E-20	4.45E-18	ASB9
ENSG00000102100.16_7	1623	816	1324	563	603	630	15.445001	17.929426	15.538679	5.607412	6.327698	7.266927	ENSG00000102100	-1.314338034	down	9.02E-13	2.38E-11	SLC35A2
ENSG00000102144.15_6	268638	112190	116521	52612	48691	63062	563.795288	509.773956	327.562805	134.217697	123.338112	167.406433	ENSG00000102144	-1.835401597	down	1.08E-16	4.22E-15	PGK1
ENSG00000102172.16_5	14783	5830	10244	27790	33890	31174	88.314407	75.117088	83.193214	202.645813	245.668701	237.004913	ENSG00000102172	1.366863405	up	4.95E-16	1.83E-14	SMS
ENSG00000102189.17_7	808	664	1156	215	599	518	1.439352	1.597465	2.653638	0.265629	0.922349	0.720374	ENSG00000102189	-1.310097016	down	8.24E-06	7.77E-05	EEA1
ENSG00000102226.10_5	8372	5016	7088	3243	3113	3977	25.639877	33.161114	28.794693	12.08639	11.416981	15.475757	ENSG00000102226	-1.257589682	down	1.51E-15	5.35E-14	USP11
ENSG00000102230.14_6	213	114	160	56	67	24	0.384582	0.444757	0.386734	0.121396	0.144048	0.054093	ENSG00000102230	-1.967978729	down	1.86E-05	0.000162046	PCYT1B
ENSG00000102265.12_4	138435	70695	89299	53001	46874	46325	1809.567871	1996.243652	1560.370728	839.619751	736.705017	764.175903	ENSG00000102265	-1.272676301	down	2.15E-12	5.47E-11	TIMP1
ENSG00000102271.14_6	40	64	70	182	407	243	0.069482	0.249136	0.191946	0.538007	1.233766	0.683548	ENSG00000102271	1.868236328	up	1.43E-05	0.000127628	KLHL4
ENSG00000102317.18_4	1953	1100	1585	347	512	482	5.086009	5.917207	8.870136	1.881613	2.564695	2.243398	ENSG00000102317	-2.067412857	down	6.75E-29	6.42E-27	RBM3
ENSG00000102362.15_3	117	146	195	23	54	23	0.293539	0.804264	0.711207	0.085554	0.243397	0.073623	ENSG00000102362	-2.552449879	down	2.16E-07	2.76E-06	SYTL4
ENSG00000102409.10_4	157	63	85	390	455	301	1.200477	1.03783	0.868371	3.619288	4.245033	2.913638	ENSG00000102409	1.686530569	up	4.63E-07	5.62E-06	BEX4
ENSG00000102452.17_6	4	10	5	46	54	26	0.005362	0.132571	0.007624	0.078656	0.091685	0.046156	ENSG00000102452	2.312288773	up	0.010061907	0.03993129	NALCN
ENSG00000102468.10_4	71	30	136	0	4	0	0.447655	0.116754	0.844917	0	0.09146	0	ENSG00000102468	-6.11385752	down	3.23E-09	5.40E-08	HTR2A
ENSG00000102580.15_5	5584	3403	5851	16549	13063	14574	10.048922	13.218184	14.079923	36.132992	28.329081	33.137814	ENSG00000102580	1.328749252	up	1.48E-13	4.36E-12	DNAJC3
ENSG00000102683.7_3	5	15	19	1641	1395	1809	0.027424	0.187549	0.156278	12.329453	10.410755	14.156696	ENSG00000102683	6.647795916	up	1.93E-81	9.10E-79	SGCG
ENSG00000102743.15_5	61	34	119	141	241	218	0.158267	0.240611	0.482201	0.776716	0.766372	1.299739	ENSG00000102743	1.239424892	up	0.003757215	0.017509714	SLC25A15
ENSG00000102858.13_9	441	263	321	93	190	199	0.947843	1.413584	2.036025	0.38561	0.838493	0.548386	ENSG00000102858	-1.396028009	down	6.93E-06	6.64E-05	MGRN1
ENSG00000102879.16_4	497	205	201	98	112	74	3.078784	2.741487	1.459453	0.764052	0.587944	0.567204	ENSG00000102879	-1.899561059	down	3.46E-07	4.29E-06	CORO1A
ENSG00000102897.10_4	672	364	801	2432	3083	2880	4.905721	5.812268	7.565991	20.652802	26.794079	25.955389	ENSG00000102897	1.943672623	up	1.94E-25	1.49E-23	LYRM1
ENSG00000102898.12_5	5556	1803	3477	10107	9285	7639	28.652931	22.142708	22.103193	64.425446	65.974808	50.033249	ENSG00000102898	1.139368257	up	3.46E-07	4.29E-06	NUTF2
ENSG00000102935.11_7	272	136	260	83	92	135	0.345972	0.375465	0.480256	0.127771	0.151044	0.216222	ENSG00000102935	-1.361809084	down	5.03E-05	0.000396661	ZNF423
ENSG00000103034.14_7	466	178	382	105	92	103	1.543121	1.320927	1.520997	0.350674	0.357845	0.44673	ENSG00000103034	-1.97881645	down	2.78E-10	5.45E-09	NDRG4
ENSG00000103035.11_4	18861	7684	12695	37816	37449	31043	117.492401	103.028847	105.343048	285.998016	280.207977	243.867065	ENSG00000103035	1.226702615	up	7.30E-11	1.55E-09	PSMD7
ENSG00000103044.11_6	152	121	136	10	4	56	0.36045	0.620487	0.432082	0.028923	0.011491	0.166102	ENSG00000103044	-2.908252466	down	1.32E-05	0.000119078	HAS3
ENSG00000103126.15_6	117	101	125	257	304	344	0.394954	0.43805	0.481004	0.591451	0.764321	1.156305	ENSG00000103126	1.083318323	up	0.000503271	0.003112315	AXIN1
ENSG00000103154.9_4	16	0	4	138	111	141	0.076043	0	0.025722	1.085211	0.647592	0.86458	ENSG00000103154	4.173139732	up	3.68E-09	6.10E-08	NECAB2
ENSG00000103187.8_6	1105	545	876	1832	2505	3174	6.429718	5.960294	6.302616	12.474726	16.698427	22.312864	ENSG00000103187	1.306108147	up	6.60E-12	1.59E-10	COTL1
ENSG00000103196.12_6	143	88	139	275	313	314	0.367537	0.507859	0.406351	0.764243	0.827076	0.887989	ENSG00000103196	1.01623516	up	0.000516958	0.003181125	CRISPLD2
ENSG00000103226.18_6	492	314	380	1068	888	1288	1.21301	2.32039	1.58375	3.236361	3.218406	4.263213	ENSG00000103226	1.172384241	up	2.51E-07	3.17E-06	NOMO3
ENSG00000103227.19_8	610	246	477	135	132	250	2.572974	2.144478	2.475563	0.676147	0.728627	1.194862	ENSG00000103227	-1.602684742	down	1.52E-07	1.99E-06	LMF1
ENSG00000103241.7_4	15	0	4	54	30	42	0.041273	0	0.013503	0.184377	0.102864	0.14858	ENSG00000103241	2.677317162	up	0.008204134	0.03375019	FOXF1
ENSG00000103257.9_5	580	318	446	6265	7579	8080	1.27976	1.514156	1.314305	16.780993	20.163586	22.538242	ENSG00000103257	3.758934435	up	1.09E-128	1.72E-125	SLC7A5
ENSG00000103275.20_5	4059	1544	3122	8593	8675	8599	14.965528	12.715388	15.280875	36.954586	37.331852	37.940716	ENSG00000103275	1.361305088	up	7.45E-14	2.27E-12	UBE2I
ENSG00000103316.11_5	112	91	101	22	52	38	0.777488	1.307873	0.906857	0.17314	0.404756	0.395444	ENSG00000103316	-1.780208666	down	0.000308149	0.002017713	CRYM
ENSG00000103326.12_5	133	64	107	334	538	271	0.319334	0.374162	0.392895	1.120372	1.860963	0.948487	ENSG00000103326	1.663822979	up	7.65E-07	8.88E-06	CAPN15
ENSG00000103351.13_8	588	486	776	1571	2062	1546	1.642861	2.586619	3.012237	5.404918	6.123606	7.731049	ENSG00000103351	1.190478694	up	2.82E-08	4.13E-07	CLUAP1
ENSG00000103423.14_5	1399	742	1023	2125	2936	2797	7.396736	8.022504	6.224712	12.147326	17.003796	15.740888	ENSG00000103423	1.042235131	up	1.12E-09	2.02E-08	DNAJA3
ENSG00000103479.16_5	358	218	220	103	142	165	0.738935	1.059493	0.634221	0.265351	0.348069	0.422461	ENSG00000103479	-1.259136002	down	8.36E-05	0.000629029	RBL2
ENSG00000103496.15_6	65	67	152	197	247	400	0.454896	0.976063	1.457132	1.762016	2.129826	3.705548	ENSG00000103496	1.263013134	up	0.001701735	0.008928532	STX4
ENSG00000103657.14_8	1387	710	1216	292	617	700	0.944734	1.241713	1.283574	0.252258	0.532907	0.617895	ENSG00000103657	-1.325342899	down	9.41E-08	1.27E-06	HERC1
ENSG00000103888.17_4	245	167	159	15	31	65	0.334057	0.49045	0.309899	0.02476	0.050975	0.111046	ENSG00000103888	-2.710865361	down	1.27E-08	1.96E-07	CEMIP
ENSG00000104055.16_7	169	80	99	64	51	53	0.83806	0.684306	0.626084	0.273561	0.213269	0.35989	ENSG00000104055	-1.284531062	down	0.003963276	0.018358152	TGM5
ENSG00000104064.17_5	854	424	765	1521	2376	1687	3.930206	3.453788	4.844492	10.109859	16.163841	11.494997	ENSG00000104064	1.198346883	up	1.76E-09	3.08E-08	GABPB1
ENSG00000104131.13_5	674	387	734	928	1668	1813	2.859559	3.830975	4.417496	4.720316	9.202078	9.570532	ENSG00000104131	1.014144102	up	5.08E-06	5.02E-05	EIF3J
ENSG00000104213.13_4	1009	443	732	459	286	424	6.72748	6.368187	6.526109	3.712585	2.297095	3.571351	ENSG00000104213	-1.114375332	down	2.72E-05	0.000227846	PDGFRL
ENSG00000104313.20_7	264	282	332	67	38	84	0.66741	1.556028	1.130232	0.188574	0.111505	0.337122	ENSG00000104313	-2.545158738	down	4.27E-11	9.37E-10	EYA1
ENSG00000104332.12_6	1359	678	1354	272	364	393	3.061352	3.295997	4.079092	0.743376	0.987531	1.117157	ENSG00000104332	-1.972019773	down	4.11E-22	2.48E-20	SFRP1
ENSG00000104413.18_7	5	0	0	402	570	467	0.022198	0	0	1.592213	2.707027	1.789744	ENSG00000104413	7.923958537	up	1.17E-27	1.05E-25	ESRP1
ENSG00000104415.14_6	118	76	178	42	74	39	0.22849	0.520978	1.165515	0.223921	0.172077	0.094404	ENSG00000104415	-1.524161484	down	0.001039866	0.005828099	CCN4
ENSG00000104432.14_6	199	65	150	75	53	55	1.17186	0.691641	1.081045	0.586042	0.411963	0.355712	ENSG00000104432	-1.352340596	down	0.002346064	0.011780226	IL7
ENSG00000104447.12_6	630	336	745	254	374	371	0.666565	0.817459	1.095133	0.310314	0.464469	0.470952	ENSG00000104447	-1.032192871	down	2.17E-05	0.000185676	TRPS1
ENSG00000104450.13_3	162	91	155	58	48	36	0.823122	0.958471	1.314649	0.366803	0.154139	0.15485	ENSG00000104450	-1.755573362	down	5.78E-05	0.000450849	SPAG1
ENSG00000104490.18_8	105	47	134	34	6	3	0.601756	1.143309	1.294346	0.108038	0.050398	0.009042	ENSG00000104490	-2.8382875	down	0.00021501	0.001468126	NCALD
ENSG00000104549.12_4	3187	1718	2384	858	1094	1124	10.87039	12.623322	10.860152	3.583923	4.494198	4.837406	ENSG00000104549	-1.514066953	down	9.32E-20	4.72E-18	SQLE
ENSG00000104722.14_4	21	9	64	0	0	0	0.131658	0.058064	0.339213	0	0	0	ENSG00000104722	-7.595713195	down	2.61E-06	2.72E-05	NEFM
ENSG00000104825.17_5	163	79	256	331	576	353	0.791859	0.830089	1.564275	1.895679	3.557619	2.283487	ENSG00000104825	1.107564598	up	0.001154786	0.006391262	NFKBIB
ENSG00000104833.12_8	928	538	619	163	154	202	4.325787	5.239442	3.861495	0.90638	0.831725	1.1458	ENSG00000104833	-2.282483981	down	4.00E-20	2.12E-18	TUBB4A
ENSG00000104848.1_3	93	35	70	0	34	16	0.212881	0.172973	0.215299	0	0.092468	0.046148	ENSG00000104848	-2.275637192	down	0.008381399	0.034341768	KCNA7
ENSG00000104852.15_6	252	119	155	100	96	96	2.064794	2.291109	1.607647	0.615367	0.850747	1.052097	ENSG00000104852	-1.090432062	down	0.002544464	0.012623384	SNRNP70
ENSG00000104863.12_4	570	274	538	1070	1103	1077	7.31394	8.15103	10.04323	18.400007	17.614714	19.116993	ENSG00000104863	1.001253125	up	1.03E-06	1.17E-05	LIN7B
ENSG00000104883.8_6	243	160	180	388	436	654	2.267068	3.214041	2.242348	4.452627	4.901784	7.702496	ENSG00000104883	1.038551186	up	0.000192893	0.001333308	PEX11G
ENSG00000104885.18_4	178	163	180	68	88	106	0.248796	0.469749	0.490863	0.118578	0.158386	0.175344	ENSG00000104885	-1.330299972	down	0.000324827	0.002115771	DOT1L
ENSG00000104886.12_5	1356	637	1432	4094	6033	6974	10.902566	10.931027	15.190105	39.61203	58.891178	71.509933	ENSG00000104886	2.06970654	up	1.52E-27	1.34E-25	PLEKHJ1
ENSG00000104907.12_6	629	353	520	1073	1332	1230	2.98177	3.612889	3.223382	6.013746	7.247096	7.25065	ENSG00000104907	1.008806739	up	6.69E-08	9.26E-07	TRMT1
ENSG00000104953.20_5	166	131	147	55	26	50	1.639872	1.990998	1.935652	0.515905	0.613247	0.681547	ENSG00000104953	-2.046640171	down	7.20E-06	6.86E-05	TLE6
ENSG00000104967.7_6	200	61	115	41	80	34	0.24722	0.161124	0.189961	0.060151	0.118337	0.051999	ENSG00000104967	-1.483413827	down	0.00270019	0.013270451	NOVA2
ENSG00000104979.9_5	39123	14447	25631	63551	63465	60007	443.660248	352.694458	390.334198	869.048279	863.532166	855.022949	ENSG00000104979	1.035697485	up	2.47E-08	3.65E-07	C19orf53
ENSG00000104980.8_6	97	149	118	810	1261	2208	0.957756	2.143581	1.211613	6.198032	9.245072	15.718798	ENSG00000104980	3.126835276	up	7.53E-20	3.87E-18	TIMM44
ENSG00000105136.20_4	250	75	209	418	428	454	0.796997	0.292763	0.785512	2.212509	2.289747	2.779666	ENSG00000105136	1.095089788	up	0.00031288	0.002045856	ZNF419
ENSG00000105141.6_5	8	5	24	0	0	0	0.025593	0.028262	0.102427	0	0	0	ENSG00000105141	-6.281425928	down	0.001803422	0.009386943	CASP14
ENSG00000105185.12_4	29389	14628	22713	76160	74819	48845	515.18219	527.213501	506.064911	1623.507202	1513.233398	1029.180908	ENSG00000105185	1.356142233	up	3.63E-11	8.02E-10	PDCD5
ENSG00000105193.9_5	17190	7583	13021	32810	31830	25414	269.112915	270.976593	289.031799	667.453247	608.516846	495.547089	ENSG00000105193	1.037025033	up	2.36E-08	3.49E-07	RPS16
ENSG00000105202.9_9	1752	889	1647	3770	3618	3883	15.775103	17.211014	21.36092	41.205173	39.043983	44.139603	ENSG00000105202	1.157284766	up	6.11E-12	1.48E-10	FBL
ENSG00000105204.14_7	136	99	54	39	30	50	0.654376	0.858663	0.264915	0.223869	0.13227	0.388767	ENSG00000105204	-1.608379987	down	0.002841501	0.013829617	DYRK1B
ENSG00000105220.17_8	29695	17374	22712	11384	11004	13555	85.824394	92.621262	72.435501	33.685345	31.479595	42.142021	ENSG00000105220	-1.228016224	down	3.06E-15	1.06E-13	GPI
ENSG00000105254.12_6	484	274	617	952	1201	2743	5.107054	6.130043	8.805699	12.709616	15.674075	36.05154	ENSG00000105254	1.551014979	up	2.29E-07	2.92E-06	TBCB
ENSG00000105270.15_5	303	138	262	103	132	180	0.907348	0.894113	1.072155	0.369571	0.471609	0.679308	ENSG00000105270	-1.011630708	down	0.001692818	0.008891628	CLIP3
ENSG00000105281.12_6	2046	1059	2072	14295	19193	19856	10.155883	10.485438	10.512877	79.967636	114.972198	114.305176	ENSG00000105281	3.109833723	up	2.96E-92	1.94E-89	SLC1A5
ENSG00000105355.9_7	9029	5129	7236	3710	4156	4530	41.267281	50.504086	43.724064	20.873386	23.263794	26.448954	ENSG00000105355	-1.056245908	down	2.50E-13	7.15E-12	PLIN3
ENSG00000105402.8_7	13807	5948	8909	4915	5483	4495	84.79335	80.164528	77.539864	36.596062	40.925175	34.511211	ENSG00000105402	-1.171952503	down	1.06E-10	2.21E-09	NAPA
ENSG00000105443.15_6	1045	703	860	2392	2970	3810	2.499911	4.325222	2.605623	6.57018	8.620388	11.240036	ENSG00000105443	1.510489871	up	3.86E-16	1.44E-14	CYTH2
ENSG00000105467.9_4	110	34	68	15	14	14	1.081473	0.70186	0.872125	0.176813	0.153267	0.200254	ENSG00000105467	-2.491184634	down	6.90E-05	0.00052937	SYNGR4
ENSG00000105486.14_8	679	263	283	168	228	207	2.317447	2.473213	1.275379	0.62391	0.98446	0.803851	ENSG00000105486	-1.261802275	down	6.25E-05	0.000484128	LIG1
ENSG00000105501.12_5	23	7	11	0	0	0	0.095853	0.056187	0.058166	0	0	0	ENSG00000105501	-6.412646215	down	0.00089678	0.005152992	SIGLEC5
ENSG00000105509.11_5	19	5	18	0	0	2	0.08646	0.117714	0.113729	0	0	0.024306	ENSG00000105509	-4.61697531	down	0.009842849	0.039187121	HAS1
ENSG00000105519.18_6	5346	1762	2381	161	134	60	34.713654	24.589167	20.641731	1.393962	1.070082	0.494121	ENSG00000105519	-4.9058223	down	1.65E-19	8.18E-18	CAPS
ENSG00000105520.10_4	376	171	294	140	112	152	1.400058	1.667407	1.559977	0.618785	0.506511	0.698964	ENSG00000105520	-1.286461679	down	3.50E-05	0.000286182	PLPPR2
ENSG00000105550.10_5	14	0	0	111	115	94	0.154427	0	0	1.313529	1.549822	1.333601	ENSG00000105550	4.501069233	up	0.009132926	0.036864349	FGF21
ENSG00000105559.12_6	715	301	558	88	92	72	2.779835	2.252754	3.402908	0.492618	0.449305	0.29254	ENSG00000105559	-2.860408378	down	8.21E-24	5.82E-22	PLEKHA4
ENSG00000105655.19_8	490	221	314	127	156	183	2.222109	2.361674	2.093696	0.969189	1.149406	1.414209	ENSG00000105655	-1.389277529	down	1.40E-06	1.54E-05	ISYNA1
ENSG00000105662.16_5	177	81	213	50	72	89	0.255672	0.253381	0.413082	0.08777	0.124411	0.162522	ENSG00000105662	-1.401158158	down	0.000542159	0.003309647	CRTC1
ENSG00000105677.12_4	5133	2645	5285	11459	11627	12831	58.806145	64.935699	77.900009	153.379333	154.535828	179.919281	ENSG00000105677	1.220052222	up	7.18E-15	2.42E-13	TMEM147
ENSG00000105701.16_9	1366	542	676	251	410	508	8.277881	7.354721	5.236405	1.786698	2.792167	4.111389	ENSG00000105701	-1.401556441	down	2.93E-07	3.67E-06	FKBP8
ENSG00000105722.10_6	107	98	21	13	22	11	0.866113	1.434919	0.104314	0.055181	0.098486	0.242536	ENSG00000105722	-2.694425746	down	0.000189703	0.001314242	ERF
ENSG00000105793.16_4	385	290	386	873	963	1163	0.811985	1.383107	1.365896	3.900353	2.792141	2.548043	ENSG00000105793	1.198607454	up	1.67E-08	2.52E-07	GTPBP10
ENSG00000105808.13	138	153	163	38	64	118	0.62258	0.791599	0.498465	0.1895	0.160545	0.268312	ENSG00000105808	-1.430475252	down	0.001712086	0.008974858	RASA4
ENSG00000105855.10_4	18703	10917	17557	1053	965	1224	21.604118	26.951176	26.675201	1.446442	1.344041	1.733358	ENSG00000105855	-4.122706666	down	5.18E-154	2.04E-150	ITGB8
ENSG00000105877.18_5	283	184	215	79	90	208	0.23597	0.490625	0.43827	0.066896	0.218919	0.32479	ENSG00000105877	-1.172938029	down	0.002350217	0.011796062	DNAH11
ENSG00000105879.12_5	2890	1657	2714	862	1094	967	11.449331	14.224169	18.600313	3.420939	5.14426	4.591666	ENSG00000105879	-1.576555904	down	2.00E-22	1.27E-20	CBLL1
ENSG00000105894.12_5	51502	23515	33723	7951	8627	7017	348.724426	344.116333	305.240326	65.366203	70.42112	60.028679	ENSG00000105894	-2.437269678	down	4.46E-43	7.12E-41	PTN
ENSG00000105963.15_9	14	8	12	60	70	41	0.056444	0.073608	0.063536	0.306218	0.372189	0.217629	ENSG00000105963	2.079786388	up	0.003177325	0.015216223	ADAP1
ENSG00000105982.16_3	22	16	25	111	54	76	0.094938	0.375132	0.400556	0.740782	0.402144	0.834892	ENSG00000105982	1.693590359	up	0.005205291	0.023100375	RNF32
ENSG00000105983.22_7	192	207	244	48	100	199	0.445463	0.561595	0.843528	0.077296	0.176686	0.362221	ENSG00000105983	-1.277515617	down	0.003634433	0.017021981	LMBR1
ENSG00000106028.11_7	18318	6588	11375	29891	31870	24051	269.525391	217.078445	223.291107	539.44574	579.734924	446.025818	ENSG00000106028	1.043207368	up	3.53E-07	4.37E-06	SSBP1
ENSG00000106031.9_8	12	46	68	15	7	11	0.02263	0.196172	0.179969	0.035144	0.016761	0.026123	ENSG00000106031	-2.289175723	down	0.007676627	0.031999474	HOXA13
ENSG00000106049.9_5	683	422	725	1190	1666	2627	3.727671	4.870342	5.211	7.754508	10.773605	17.876783	ENSG00000106049	1.29004479	up	2.90E-08	4.24E-07	HIBADH
ENSG00000106070.20_7	716	515	808	1543	2259	2570	1.630036	2.601685	2.375287	3.850915	5.895124	6.875726	ENSG00000106070	1.3414548	up	6.25E-12	1.51E-10	GRB10
ENSG00000106080.11_4	2091	1518	2236	521	455	702	5.052765	8.640521	6.314186	1.519936	1.394786	1.933489	ENSG00000106080	-2.090041358	down	3.11E-24	2.23E-22	FKBP14
ENSG00000106105.14_5	10136	6312	9309	33784	55467	45832	42.594654	57.497162	51.820618	169.809448	278.43457	241.117294	ENSG00000106105	2.10140994	up	2.10E-40	3.16E-38	GARS1
ENSG00000106133.18_5	56	46	50	162	150	180	0.32894	0.538102	0.415075	1.106817	1.017436	1.281046	ENSG00000106133	1.390337463	up	0.000688444	0.00409751	NSUN5P2
ENSG00000106245.11_4	11778	4375	8593	37138	38029	31104	110.330399	88.580086	107.102196	420.588593	427.48645	368.13562	ENSG00000106245	1.903641854	up	4.80E-23	3.25E-21	BUD31
ENSG00000106278.12_4	396	178	233	0	23	0	0.770221	0.66195	0.527401	0	0.033653	0	ENSG00000106278	-5.451397167	down	0.008314136	0.034152565	PTPRZ1
ENSG00000106305.10_4	8151	3142	5205	48321	52680	41791	72.165192	59.74168	61.738754	510.640167	547.290161	459.748169	ENSG00000106305	2.903339478	up	2.65E-52	5.95E-50	AIMP2
ENSG00000106333.13_4	372	212	292	120	80	74	2.748317	3.127208	2.931528	1.06328	0.649837	1.072119	ENSG00000106333	-1.912186856	down	3.71E-08	5.34E-07	PCOLCE
ENSG00000106351.13_5	112	92	152	57	63	79	0.233137	0.411666	0.421586	0.14187	0.157014	0.207492	ENSG00000106351	-1.13698796	down	0.006658525	0.02840674	AGFG2
ENSG00000106479.11_7	179	135	154	69	94	79	0.258536	0.419922	0.302617	0.133262	0.269119	0.191399	ENSG00000106479	-1.260806125	down	0.00071404	0.004227467	ZNF862
ENSG00000106511.6_5	30	32	20	0	0	0	0.123624	0.287937	0.11211	0	0	0	ENSG00000106511	-7.589552982	down	1.40E-06	1.55E-05	MEOX2
ENSG00000106537.8_4	9454	10295	15192	674	966	1114	50.780022	119.351357	109.104408	4.391067	6.246789	7.557049	ENSG00000106537	-4.008509542	down	2.98E-73	1.13E-70	TSPAN13
ENSG00000106541.12_5	723	334	617	0	0	15	4.28288	4.446239	4.899584	0	0	0.110354	ENSG00000106541	-7.13023889	down	0.000125041	0.000905396	AGR2
ENSG00000106554.13_7	5110	2203	3626	14318	16587	14764	33.528191	31.02228	32.898094	113.66642	129.748428	121.947357	ENSG00000106554	1.831963415	up	1.09E-28	1.03E-26	CHCHD3
ENSG00000106571.14_7	684	495	649	153	311	192	0.840984	1.400602	1.120987	0.220749	0.447717	0.346647	ENSG00000106571	-1.790559375	down	4.74E-11	1.03E-09	GLI3
ENSG00000106610.15_7	1959	1172	1660	4050	5073	4125	10.143867	12.608328	11.709269	25.161032	32.375748	25.900444	ENSG00000106610	1.196396115	up	1.70E-13	4.96E-12	STAG3L4
ENSG00000106615.10_7	34122	15362	27588	64680	76987	76397	224.310532	191.342117	231.279099	503.696381	599.109558	650.930847	ENSG00000106615	1.264390577	up	6.33E-18	2.72E-16	RHEB
ENSG00000106617.15_8	392	246	427	931	1528	1060	1.720547	2.023799	2.240729	4.785511	7.675367	5.465349	ENSG00000106617	1.447385909	up	1.00E-10	2.10E-09	PRKAG2
ENSG00000106799.13_5	258	173	382	792	886	1141	0.67133	0.866008	1.28545	2.320153	2.193115	3.035545	ENSG00000106799	1.525476612	up	6.69E-10	1.25E-08	TGFBR1
ENSG00000106829.19_7	258	236	256	97	147	120	0.880999	2.401385	1.345748	0.232508	0.493885	0.398235	ENSG00000106829	-1.379930897	down	2.64E-05	0.00022204	TLE4
ENSG00000106853.20_8	2836	1211	1960	4962	5601	5384	22.232151	19.752161	20.071301	47.803677	53.440964	48.869083	ENSG00000106853	1.177923378	up	5.60E-12	1.36E-10	PTGR1
ENSG00000106948.16_5	74	39	55	706	1009	809	0.125715	0.134766	0.136794	1.68205	1.973864	1.42013	ENSG00000106948	3.642815646	up	8.35E-44	1.41E-41	AKNA
ENSG00000106976.21_3	404	297	416	207	249	225	1.684329	1.628066	2.029297	0.738795	0.703193	0.981229	ENSG00000106976	-1.006094527	down	9.45E-05	0.000702484	DNM1
ENSG00000106991.13_3	223	117	195	53	87	47	0.816588	0.921377	0.855828	0.210934	0.345469	0.191851	ENSG00000106991	-1.772742368	down	6.19E-06	6.01E-05	ENG
ENSG00000107014.9_5	49	11	48	159	146	181	0.552862	0.237181	0.720973	2.093768	2.411309	2.646649	ENSG00000107014	1.997466129	up	3.05E-05	0.000251903	RLN1
ENSG00000107077.18_5	349	221	212	75	99	158	1.132543	1.286706	0.912881	0.312033	0.284769	0.660217	ENSG00000107077	-1.552579055	down	1.18E-05	0.000106892	KDM4C
ENSG00000107105.15_10	92	84	92	19	21	66	0.443125	0.841414	0.377627	0.164412	0.06262	0.600608	ENSG00000107105	-1.701790548	down	0.003192372	0.015275886	ELAVL2
ENSG00000107159.13_4	10140	3647	4188	194	135	245	65.982414	51.219372	37.737846	1.522675	1.050539	2.010709	ENSG00000107159	-5.183629657	down	3.92E-83	1.93E-80	CA9
ENSG00000107201.10_5	5771	2286	3194	382	505	434	12.747148	10.840904	9.321901	1.023991	1.321054	1.202455	ENSG00000107201	-3.322255845	down	7.19E-58	1.93E-55	DDX58
ENSG00000107281.10_6	279	162	336	537	670	651	2.037021	2.701945	2.408356	3.083265	4.00024	3.995649	ENSG00000107281	1.000385775	up	2.80E-05	0.0002335	NPDC1
ENSG00000107295.10_5	58	40	167	207	214	266	0.2197	0.324373	0.854827	0.961049	0.988545	1.289621	ENSG00000107295	1.142547963	up	0.010353035	0.040894143	SH3GL2
ENSG00000107404.20_7	127	77	105	234	327	446	0.385842	0.503886	0.423846	0.86294	1.19919	1.712345	ENSG00000107404	1.409526834	up	9.23E-06	8.58E-05	DVL1
ENSG00000107551.21_8	3243	1780	2933	1233	1128	1427	10.118834	11.117656	12.593866	5.168515	4.136341	5.667101	ENSG00000107551	-1.32280902	down	1.23E-14	4.03E-13	RASSF4
ENSG00000107611.16_6	186	72	122	65	52	37	0.2338	0.207402	0.136758	0.112809	0.16078	0.03865	ENSG00000107611	-1.49639526	down	0.001248725	0.006840604	CUBN
ENSG00000107679.14_4	553	400	372	159	177	270	1.069302	1.425206	0.574778	0.454289	0.50462	0.920155	ENSG00000107679	-1.452921125	down	7.44E-07	8.68E-06	PLEKHA1
ENSG00000107731.12_4	667	261	569	2373	2686	2601	0.979506	0.853467	1.117435	4.232451	4.777152	4.8321	ENSG00000107731	2.138285654	up	3.73E-28	3.43E-26	UNC5B
ENSG00000107796.13_8	3661	1835	2615	1059	1370	991	28.65587	32.483517	28.221996	10.320284	13.328675	10.041811	ENSG00000107796	-1.496815093	down	2.11E-15	7.39E-14	ACTA2
ENSG00000107798.18_6	1724	900	1569	518	572	690	7.282405	8.057476	8.880576	2.598181	3.091741	3.50696	ENSG00000107798	-1.490657859	down	3.44E-16	1.30E-14	LIPA
ENSG00000107815.10_7	98	66	82	293	325	327	0.370557	0.41519	0.301686	0.981565	1.187832	1.959572	ENSG00000107815	1.65706065	up	1.03E-07	1.38E-06	TWNK
ENSG00000107819.13_4	1030	596	840	376	377	398	3.640524	4.272231	4.100255	1.510049	1.498893	1.787872	ENSG00000107819	-1.362815972	down	3.93E-11	8.65E-10	SFXN3
ENSG00000107829.15_7	568	226	523	955	1192	1194	2.203214	1.878083	2.681962	6.227237	7.952109	8.593863	ENSG00000107829	1.1197282	up	2.33E-07	2.96E-06	FBXW4
ENSG00000107833.10_4	1224	719	1375	3670	5269	3652	14.06643	17.91308	21.309462	51.353073	73.344704	53.099739	ENSG00000107833	1.664892283	up	1.25E-18	5.71E-17	NPM3
ENSG00000107862.5_5	1638	1077	1507	323	615	635	2.633271	3.669593	3.283974	0.605482	1.145737	1.239607	ENSG00000107862	-1.734036789	down	3.14E-15	1.09E-13	GBF1
ENSG00000107984.10_4	13272	6068	10717	1595	2513	1777	74.921722	73.31057	80.34079	11.226941	18.001728	12.771161	ENSG00000107984	-2.596730764	down	5.19E-48	1.01E-45	DKK1
ENSG00000108010.12_4	2662	1369	1848	4500	5913	4930	18.991749	20.542933	16.562319	38.603088	51.415466	45.272018	ENSG00000108010	1.123242335	up	2.67E-11	5.97E-10	GLRX3
ENSG00000108244.17_7	561	211	294	15	10	9	3.872627	2.132306	2.650028	0.078092	0.053532	0.047567	ENSG00000108244	-5.176755594	down	2.32E-33	2.62E-31	KRT23
ENSG00000108405.4_5	0	0	0	15	4	12	0	0	0	0.058852	0.012459	0.050239	ENSG00000108405	5.554544084	up	0.011746167	0.045349732	P2RX1
ENSG00000108448.21_6	1134	894	1078	2561	3429	3400	5.948957	9.765337	7.319821	15.856931	21.140385	21.943621	ENSG00000108448	1.279531891	up	1.09E-12	2.86E-11	TRIM16L
ENSG00000108469.15_7	335	238	378	714	852	855	1.166805	3.4036	2.762156	6.091992	8.372126	5.661525	ENSG00000108469	1.063619671	up	8.18E-07	9.48E-06	RECQL5
ENSG00000108474.17_5	684	513	578	2012	2079	1838	6.638492	11.160995	7.473128	26.112125	26.010454	24.977579	ENSG00000108474	1.444869545	up	1.34E-12	3.46E-11	PIGL
ENSG00000108479.12_7	7808	3542	5692	2160	2471	2219	56.607082	55.849983	55.555084	19.084688	21.732601	21.013426	ENSG00000108479	-1.550199473	down	6.49E-21	3.65E-19	GALK1
ENSG00000108518.8_4	36220	15380	34772	55842	56693	94157	454.637726	416.073822	583.090332	850.80127	858.538147	1497.843506	ENSG00000108518	1.026627076	up	2.76E-07	3.46E-06	PFN1
ENSG00000108561.8_6	18532	8623	15731	41703	55368	50305	159.750748	160.331329	181.345581	435.761353	574.840698	547.56958	ENSG00000108561	1.538527459	up	1.60E-25	1.24E-23	C1QBP
ENSG00000108666.10_8	487	312	475	1202	1908	1481	1.284763	1.835545	1.959701	3.860842	5.326496	8.361372	ENSG00000108666	1.563573772	up	6.91E-15	2.34E-13	C17orf75
ENSG00000108679.13_6	586883	253959	339897	108282	87970	107874	2725.44873	2537.449463	2104.229492	607.210815	491.247681	630.92041	ENSG00000108679	-2.181968531	down	3.02E-29	2.95E-27	LGALS3BP
ENSG00000108691.9_4	2411	2983	4946	301	229	154	32.337948	86.448868	88.913513	4.905848	3.620676	2.599056	ENSG00000108691	-4.207295548	down	6.61E-44	1.12E-41	CCL2
ENSG00000108700.5_4	19	27	15	0	0	0	0.221452	0.677124	0.222433	0	0	0	ENSG00000108700	-7.202857773	down	1.78E-05	0.000155617	CCL8
ENSG00000108759.3_3	13	19	11	0	0	0	0.069603	0.23377	0.079841	0	0	0	ENSG00000108759	-6.698682709	down	0.000259416	0.001730294	KRT32
ENSG00000108771.13_7	854	268	409	72	73	105	3.986069	2.45787	2.62332	0.453865	0.543487	1.247919	ENSG00000108771	-2.822285468	down	7.48E-18	3.19E-16	DHX58
ENSG00000108821.14_5	11351	5543	9043	2810	2416	4164	20.161985	20.655359	21.669476	6.25747	5.158611	9.132884	ENSG00000108821	-1.714879585	down	8.56E-19	3.99E-17	COL1A1
ENSG00000108852.14_6	202	143	400	103	96	126	0.411272	0.630612	1.102421	0.253997	0.235165	0.322615	ENSG00000108852	-1.445834823	down	0.000112697	0.000826151	MPP2
ENSG00000108961.14_4	1897	1011	1404	9572	8875	7378	20.802475	22.770992	19.953674	123.532837	112.814949	97.44194	ENSG00000108961	2.34071041	up	4.39E-35	5.21E-33	RANGRF
ENSG00000108963.18_5	987	123	492	180	206	422	4.898114	1.555766	3.104735	1.192005	1.443182	2.645214	ENSG00000108963	-1.128684709	down	0.007719039	0.032129769	DPH1
ENSG00000108984.15_8	78	42	87	360	473	520	0.19409	0.190147	0.097307	3.174654	2.322902	4.031829	ENSG00000108984	2.447284443	up	1.37E-16	5.32E-15	MAP2K6
ENSG00000109065.12_8	893	408	720	2235	3001	2256	7.700961	5.119002	8.119453	15.970999	20.138931	15.610865	ENSG00000109065	1.651832207	up	3.41E-18	1.50E-16	NAT9
ENSG00000109089.7_3	1186	429	999	2660	1936	1916	3.372011	2.634048	3.798492	9.179203	6.636341	6.886914	ENSG00000109089	1.138939846	up	3.13E-06	3.23E-05	CDR2L
ENSG00000109184.15_6	596	559	758	1443	1709	1830	1.568644	2.817334	2.398582	4.343319	5.161294	5.595862	ENSG00000109184	1.059969893	up	4.81E-07	5.81E-06	DCUN1D4
ENSG00000109220.11_6	33	49	101	95	222	453	0.29285	0.957858	1.207268	1.056126	2.502303	5.183646	ENSG00000109220	1.704757922	up	0.001097901	0.006106493	CHIC2
ENSG00000109339.24_10	332	153	229	34	78	109	1.162655	1.032902	1.124619	0.074916	0.226544	0.443484	ENSG00000109339	-1.975222315	down	6.40E-07	7.55E-06	MAPK10
ENSG00000109445.11_6	1159	658	923	2042	2953	2030	6.22978	7.624531	6.696831	14.108851	19.659199	14.065027	ENSG00000109445	1.088722267	up	1.65E-08	2.49E-07	ZNF330
ENSG00000109534.17_4	377	191	395	1232	1685	1371	3.802905	4.35468	5.298358	14.897429	20.263298	17.345987	ENSG00000109534	1.907961141	up	2.74E-20	1.46E-18	GAR1
ENSG00000109654.15_6	3061	1340	2103	436	505	536	6.899638	6.971166	6.447546	2.5984	1.735182	1.597266	ENSG00000109654	-2.377585691	down	5.59E-37	7.25E-35	TRIM2
ENSG00000109689.17_7	280	253	332	90	106	193	1.682517	2.068095	1.610793	1.166429	1.37415	1.236056	ENSG00000109689	-1.490196961	down	1.55E-05	0.000136976	STIM2
ENSG00000109819.9_5	167	110	112	39	25	56	0.434914	0.5803	0.265053	0.075547	0.061269	0.128975	ENSG00000109819	-1.990772901	down	2.32E-05	0.000196831	PPARGC1A
ENSG00000109846.9_7	1488	713	1554	344	375	345	18.173351	18.681515	26.241064	5.005574	5.488344	5.235655	ENSG00000109846	-2.047989206	down	1.42E-22	9.07E-21	CRYAB
ENSG00000109854.13_3	768	334	698	1269	1193	1842	6.252231	5.203888	6.838919	11.183737	10.012738	17.910128	ENSG00000109854	1.025779849	up	3.19E-06	3.28E-05	HTATIP2
ENSG00000109861.16_5	18998	7165	10554	4925	5432	4797	99.004089	91.78196	72.421318	30.426643	39.278461	37.690083	ENSG00000109861	-1.491637798	down	3.37E-14	1.06E-12	CTSC
ENSG00000109917.11_6	624	356	398	990	1162	1287	0.956173	1.175358	0.814214	1.845386	2.167592	2.526895	ENSG00000109917	1.038396607	up	1.01E-06	1.15E-05	ZPR1
ENSG00000110076.19_5	19	18	33	0	8	0	0.027995	0.057363	0.07362	0	0.014356	0	ENSG00000110076	-3.483148488	down	0.009398775	0.037770246	NRXN2
ENSG00000110108.10_4	3270	1193	2175	963	1085	1005	15.464546	12.19036	13.754746	5.537725	6.184899	6.01323	ENSG00000110108	-1.330488684	down	4.96E-11	1.07E-09	TMEM109
ENSG00000110171.20_7	193	70	86	62	47	59	0.759015	0.51654	0.437803	0.316438	0.207534	0.254986	ENSG00000110171	-1.262775487	down	0.007338544	0.030812224	TRIM3
ENSG00000110172.12_5	692	330	820	1269	1730	1729	3.251176	2.370161	4.194464	6.197278	8.003215	9.049421	ENSG00000110172	1.120444196	up	1.10E-07	1.46E-06	CHORDC1
ENSG00000110195.13_4	31	29	63	0	0	16	0.292211	0.659057	0.809941	0	0	0.152286	ENSG00000110195	-3.309012082	down	0.004312586	0.019728411	FOLR1
ENSG00000110324.11_4	26	6	8	0	0	0	0.110931	0.01812	0.015448	0	0	0	ENSG00000110324	-6.349979556	down	0.001303888	0.007111872	IL10RA
ENSG00000110446.11_7	181	89	208	50	27	127	0.750051	0.982392	1.312071	0.238915	0.128645	0.64075	ENSG00000110446	-1.482755514	down	0.003550784	0.016663272	SLC15A3
ENSG00000110619.17_6	1172	717	839	2706	4385	3047	4.667982	6.122327	4.35587	13.028507	20.946602	14.790503	ENSG00000110619	1.602140612	up	1.18E-15	4.24E-14	CARS1
ENSG00000110660.15_8	4695	2400	4311	20782	25274	19789	17.066208	18.817398	20.941738	91.604584	109.92749	90.83773	ENSG00000110660	2.286813379	up	7.62E-47	1.39E-44	SLC35F2
ENSG00000110693.18_8	184	146	147	51	70	100	0.318131	0.687292	0.770606	0.080237	0.218552	0.257413	ENSG00000110693	-1.44700875	down	0.000279086	0.001847397	SOX6
ENSG00000110711.10_7	4078	1628	3109	7176	7532	5995	33.260395	28.661505	34.07238	70.97538	73.952156	61.726723	ENSG00000110711	1.02391476	up	9.26E-08	1.25E-06	AIP
ENSG00000110717.13_6	35023	13714	24438	66756	63106	53459	474.548462	400.886078	440.417023	1097.676758	1031.179688	915.537231	ENSG00000110717	1.122414203	up	5.28E-09	8.56E-08	NDUFS8
ENSG00000110721.12_5	203	115	191	360	458	462	0.776835	0.968773	0.962761	1.649305	2.267183	2.1742	ENSG00000110721	1.063624195	up	3.55E-05	0.00028983	CHKA
ENSG00000110841.14_9	5264	2581	3927	1137	2159	1838	40.538937	38.471661	35.18306	6.166345	15.207324	7.656662	ENSG00000110841	-1.468598232	down	2.69E-14	8.54E-13	PPFIBP1
ENSG00000110844.13_5	369	133	515	100	139	141	1.418224	0.957931	2.498238	0.460448	0.77401	0.814026	ENSG00000110844	-1.625427662	down	4.59E-06	4.58E-05	PRPF40B
ENSG00000110852.4_4	6534	4859	3430	2640	2627	2379	38.873089	62.532642	27.343452	19.05521	18.768913	17.834511	ENSG00000110852	-1.272489166	down	1.19E-07	1.58E-06	CLEC2B
ENSG00000110925.7_7	131	40	127	167	286	270	0.494401	0.191072	0.377346	0.495651	0.766777	0.949798	ENSG00000110925	1.06522234	up	0.00471888	0.021273711	CSRNP2
ENSG00000111052.7_5	288	151	221	113	76	93	1.089416	1.686058	0.587831	0.225152	0.222196	0.445491	ENSG00000111052	-1.461131169	down	3.71E-05	0.000301885	LIN7A
ENSG00000111087.10_5	34	26	36	163	138	109	0.085987	0.270479	0.121561	0.498995	0.418515	0.346669	ENSG00000111087	1.828480201	up	0.000116119	0.000849655	GLI1
ENSG00000111199.11_4	11	11	33	0	0	0	0.03206	0.071422	0.134618	0	0	0	ENSG00000111199	-6.902289807	down	9.79E-05	0.000725708	TRPV4
ENSG00000111215.12_7	270	87	95	6	11	14	3.632965	2.208834	1.645409	0.061956	0.134846	0.257019	ENSG00000111215	-4.098763126	down	3.44E-13	9.62E-12	PRH1
ENSG00000111218.12_5	0	8	0	43	36	50	0	0.029448	0	0.08795	0.167997	0.107535	ENSG00000111218	3.364570284	up	0.004993365	0.022332016	PRMT8
ENSG00000111231.9_5	2447	1182	2076	4129	5240	4200	17.779238	17.716236	19.83943	35.350853	44.479881	37.542728	ENSG00000111231	1.008479515	up	1.36E-09	2.41E-08	GPN3
ENSG00000111261.14_7	190	98	146	84	86	72	0.992424	0.875627	0.781772	0.301459	0.325094	0.163349	ENSG00000111261	-1.087141676	down	0.004400297	0.020067429	MANSC1
ENSG00000111262.6_7	11	7	10	0	0	0	0.012852	0.018999	0.016847	0	0	0	ENSG00000111262	-5.940456472	down	0.00526469	0.023280817	KCNA1
ENSG00000111319.13_8	261	116	158	40	25	49	0.772122	0.730214	0.604373	0.138289	0.084235	0.175367	ENSG00000111319	-2.464918323	down	1.07E-08	1.67E-07	SCNN1A
ENSG00000111331.13_6	7062	2982	4757	466	530	669	19.551523	16.830542	15.75527	1.759896	1.457072	2.3507	ENSG00000111331	-3.391101488	down	3.60E-75	1.46E-72	OAS3
ENSG00000111335.13_5	1501	764	1341	60	37	135	3.920908	4.258682	4.612702	0.183463	0.12102	0.514107	ENSG00000111335	-4.220718038	down	1.12E-38	1.57E-36	OAS2
ENSG00000111341.10_5	107106	29454	39555	3708	2926	2747	658.545593	391.304932	746.040466	28.389265	22.842775	21.936756	ENSG00000111341	-4.392031201	down	2.90E-19	1.40E-17	MGP
ENSG00000111348.9_6	4681	1954	3125	991	1593	1000	41.02293	36.464622	37.096081	10.375201	17.330345	11.12842	ENSG00000111348	-1.681558081	down	2.12E-15	7.43E-14	ARHGDIB
ENSG00000111371.16_6	2286	1356	1921	5818	9056	8612	4.284688	4.420697	3.531702	11.318958	17.994928	17.284992	ENSG00000111371	1.790632774	up	7.38E-29	6.97E-27	SLC38A1
ENSG00000111665.11_4	1788	714	1210	3502	3880	2930	11.550332	9.310645	10.1923	35.253811	38.454659	26.618002	ENSG00000111665	1.260235063	up	6.80E-10	1.27E-08	CDCA3
ENSG00000111670.16_7	330	276	515	90	210	320	0.859056	1.065354	1.261319	0.193264	0.441206	0.820003	ENSG00000111670	-1.187394771	down	0.00123417	0.006776593	GNPTAB
ENSG00000111674.9_6	3608	2150	2432	1256	1308	1576	14.695589	19.611593	12.620954	6.365753	5.760966	7.354075	ENSG00000111674	-1.266822667	down	5.93E-12	1.44E-10	ENO2
ENSG00000111676.15_5	530	310	455	97	128	150	1.141155	1.444768	1.425422	0.267448	0.334543	0.428218	ENSG00000111676	-2.068294051	down	5.86E-15	2.01E-13	ATN1
ENSG00000111684.11_5	800	572	1007	176	227	209	3.562741	5.627771	6.342557	0.926207	1.191018	1.236842	ENSG00000111684	-2.24094664	down	2.31E-22	1.44E-20	LPCAT3
ENSG00000111707.12_4	215	121	290	380	636	600	0.457107	0.555943	0.823945	1.048697	1.631798	1.613176	ENSG00000111707	1.104619811	up	7.55E-05	0.000573714	SUDS3
ENSG00000111725.11_5	445	292	360	989	1271	1286	2.002301	2.699103	2.142269	5.318025	6.862247	7.305741	ENSG00000111725	1.399350244	up	2.84E-12	7.14E-11	PRKAB1
ENSG00000111726.13_4	559	326	665	897	1063	2357	3.287543	4.138257	5.172303	6.315	7.436612	17.186914	ENSG00000111726	1.19373301	up	2.99E-05	0.000247852	CMAS
ENSG00000111728.10_5	35	59	105	24	41	15	0.03614	0.153593	0.170709	0.029821	0.056127	0.063934	ENSG00000111728	-1.64802764	down	0.012559193	0.047816087	ST8SIA1
ENSG00000111801.16_6	347	138	228	37	50	87	1.062008	0.842389	1.200982	0.143826	0.131121	0.365683	ENSG00000111801	-2.285245035	down	4.22E-09	6.94E-08	BTN3A3
ENSG00000111875.8_4	1269	686	1214	4104	4641	3488	5.307481	6.316326	6.795498	20.673376	23.188814	18.262295	ENSG00000111875	1.70557084	up	1.01E-20	5.57E-19	ASF1A
ENSG00000111906.18_5	1437	461	988	3775	3186	2852	10.444124	7.598974	9.534163	33.247105	27.942551	26.631212	ENSG00000111906	1.590564375	up	1.74E-11	3.98E-10	HDDC2
ENSG00000111911.7_4	52	32	30	93	126	131	0.156257	0.20393	0.117596	0.338695	0.458776	0.498335	ENSG00000111911	1.320102306	up	0.005419551	0.023853905	HINT3
ENSG00000111913.20_9	56	61	76	10	24	23	0.164853	0.356306	0.318887	0.033187	0.095561	0.052127	ENSG00000111913	-2.124457934	down	0.000636644	0.003826833	RIPOR2
ENSG00000111962.8_4	81	65	251	248	294	470	0.17938	0.311612	0.896718	0.670687	0.925807	1.332654	ENSG00000111962	1.091738819	up	0.00988028	0.039303001	UST
ENSG00000112110.10_4	5024	1941	3559	10057	8903	8522	53.488617	43.860222	50.72781	132.14563	114.721855	115.612373	ENSG00000112110	1.18394724	up	1.45E-09	2.55E-08	MRPL18
ENSG00000112139.16_7	109	103	153	27	43	48	0.134593	0.210395	0.201894	0.338089	0.172861	0.111332	ENSG00000112139	-1.958729152	down	1.89E-05	0.000164593	MDGA1
ENSG00000112144.15_4	1045	487	549	177	369	407	1.704861	1.710238	1.197193	0.345943	0.718167	0.833474	ENSG00000112144	-1.4127169	down	1.16E-06	1.30E-05	ICK
ENSG00000112146.16_4	607	421	818	178	258	470	2.851495	3.515422	4.929678	0.748633	1.121238	2.848244	ENSG00000112146	-1.328894368	down	1.16E-05	0.000105613	FBXO9
ENSG00000112218.9_5	22	8	15	69	53	55	0.035903	0.027123	0.032403	0.140376	0.107166	0.116847	ENSG00000112218	1.775341409	up	0.00836806	0.034327692	GPR63
ENSG00000112246.10_4	114	67	76	22	25	32	0.188278	0.170252	0.122998	0.031069	0.035079	0.060747	ENSG00000112246	-1.988000522	down	0.000134312	0.000966892	SIM1
ENSG00000112306.8_4	4060	1967	3169	7529	8038	6788	80.401344	84.387108	84.032082	180.166061	191.261185	168.014053	ENSG00000112306	1.045797937	up	4.79E-10	9.07E-09	RPS12
ENSG00000112320.12_4	398	175	305	45	40	77	0.730582	0.852622	0.988395	0.086324	0.076083	0.155237	ENSG00000112320	-2.681085632	down	5.29E-14	1.64E-12	SOBP
ENSG00000112530.11_4	6	5	34	78	70	70	0.034469	0.053649	0.318795	0.586929	0.520773	0.547054	ENSG00000112530	2.071272603	up	0.005828467	0.025405125	PACRG
ENSG00000112559.14_5	97	55	52	0	11	25	0.531698	0.727989	0.362473	0	0.068781	0.299542	ENSG00000112559	-2.862801849	down	0.000624725	0.003761898	MDFI
ENSG00000112584.13_4	1998	1377	1932	833	1119	1048	3.897038	5.793621	5.03807	1.979375	2.629445	2.579891	ENSG00000112584	-1.116909467	down	9.05E-11	1.90E-09	FAM120B
ENSG00000112667.13_5	1276	615	1114	4051	4667	5402	18.302481	19.738544	21.999264	71.314812	80.157402	96.569786	ENSG00000112667	1.98503066	up	6.10E-35	7.19E-33	DNPH1
ENSG00000112769.20_8	2466	1163	2017	784	1044	853	8.920074	6.341505	8.654059	4.195435	4.820765	3.025213	ENSG00000112769	-1.317478605	down	3.01E-13	8.48E-12	LAMA4
ENSG00000112796.10_5	424	235	401	131	178	189	1.817951	1.410652	2.185294	0.511571	0.816506	0.957908	ENSG00000112796	-1.357753635	down	3.75E-07	4.61E-06	ENPP5
ENSG00000112855.17_8	398	208	329	650	811	834	1.692035	2.890758	1.85403	3.224841	4.364761	4.675687	ENSG00000112855	1.034667963	up	1.01E-06	1.15E-05	HARS2
ENSG00000112902.12_7	979	814	1108	367	321	402	0.837911	1.503555	1.266942	0.380968	0.330217	0.445182	ENSG00000112902	-1.71115561	down	5.49E-14	1.69E-12	SEMA5A
ENSG00000112984.12_5	2808	1419	2427	1132	1410	1095	9.713363	11.140412	11.58485	5.168344	6.11005	5.226933	ENSG00000112984	-1.116316542	down	3.19E-10	6.19E-09	KIF20A
ENSG00000113013.15_9	4066	1999	2969	21460	32225	27902	10.001644	10.840968	10.119677	60.300461	89.745667	82.301605	ENSG00000113013	2.913692042	up	1.80E-75	7.47E-73	HSPA9
ENSG00000113083.14_7	878	698	791	2166	2646	4685	2.335912	3.818202	2.771081	8.5953	12.215917	15.968266	ENSG00000113083	1.667823711	up	2.81E-12	7.09E-11	LOX
ENSG00000113140.11_7	315526	136184	156696	28800	28973	31543	925.891174	863.779846	615.444092	102.51474	102.431778	116.923233	ENSG00000113140	-3.006183355	down	4.12E-52	9.19E-50	SPARC
ENSG00000113212.7_4	175	206	229	85	85	179	0.469934	1.193552	0.821657	0.276136	0.272979	0.607756	ENSG00000113212	-1.175403202	down	0.003395963	0.01606447	PCDHB7
ENSG00000113369.9_5	1762	1779	1728	547	597	601	4.235975	9.683162	5.53479	1.600567	1.735598	1.799385	ENSG00000113369	-1.939835491	down	1.65E-17	6.79E-16	ARRDC3
ENSG00000113384.14_5	171	189	338	73	106	101	0.641834	1.526867	1.696966	0.32943	0.477808	0.476089	ENSG00000113384	-1.638903102	down	1.25E-05	0.000113034	GOLPH3
ENSG00000113407.13_5	2058	1213	1665	4647	7895	6154	4.969777	6.624213	5.24342	13.494245	27.263937	20.344017	ENSG00000113407	1.634407166	up	1.78E-20	9.60E-19	TARS1
ENSG00000113441.16_6	665	495	678	196	186	349	0.599334	0.937961	1.025818	0.205681	0.185662	0.364762	ENSG00000113441	-1.637738691	down	1.99E-09	3.43E-08	LNPEP
ENSG00000113504.21_9	79	70	75	222	149	323	0.149334	0.332014	0.190224	0.50956	0.338719	0.772457	ENSG00000113504	1.312014031	up	0.001083114	0.006032777	SLC12A7
ENSG00000113532.13_5	266	233	314	97	188	130	0.428571	0.85841	0.753545	0.189818	0.377716	0.270178	ENSG00000113532	-1.298196316	down	8.14E-05	0.000613799	ST8SIA4
ENSG00000113552.16_8	1415	583	719	1722	2449	2524	6.097083	5.462741	3.703859	8.998585	13.045235	13.902108	ENSG00000113552	1.051065506	up	1.83E-06	1.97E-05	GNPDA1
ENSG00000113583.8_5	1572	1101	1171	593	616	682	7.31771	11.229746	7.197649	3.306194	3.411134	4.11897	ENSG00000113583	-1.323671964	down	1.12E-10	2.33E-09	C5orf15
ENSG00000113621.15_5	2782	1744	1991	979	953	1085	9.119867	12.489449	8.685202	3.89857	3.880044	4.977546	ENSG00000113621	-1.392985497	down	1.18E-13	3.51E-12	TXNDC15
ENSG00000113721.14_5	375	206	455	144	236	188	0.683149	0.778488	1.073178	0.307835	0.50101	0.417445	ENSG00000113721	-1.124896412	down	0.000103464	0.000762729	PDGFRB
ENSG00000113734.17_6	251	131	232	501	502	475	2.117092	2.497893	2.629807	5.100684	5.03135	5.078773	ENSG00000113734	1.025987731	up	5.12E-05	0.000402331	BNIP1
ENSG00000113739.10_6	551	257	406	4366	6207	4683	1.066325	1.106423	1.058242	10.265532	14.487709	11.334756	ENSG00000113739	3.403144441	up	4.77E-77	2.08E-74	STC2
ENSG00000113761.12_6	171	227	436	536	985	960	1.017939	1.383377	1.641615	2.304357	3.351344	4.007555	ENSG00000113761	1.232521344	up	0.000172494	0.001208941	ZNF346
ENSG00000113810.16_6	5235	4217	6995	10523	21407	30754	13.832473	19.151112	19.516289	54.904919	62.010601	86.604378	ENSG00000113810	1.596832332	up	1.46E-10	2.97E-09	SMC4
ENSG00000113845.10_4	3591	1642	2750	6730	7022	7670	16.631374	16.239679	20.48494	37.054302	47.719196	48.825512	ENSG00000113845	1.188089389	up	7.08E-14	2.16E-12	TIMMDC1
ENSG00000113916.18_6	3201	2422	2749	663	940	819	11.350305	17.50824	12.85328	3.662746	5.40361	4.029138	ENSG00000113916	-2.105340383	down	1.98E-29	1.95E-27	BCL6
ENSG00000114023.15_3	2190	749	1258	785	522	622	7.386439	5.392992	6.760395	3.287283	2.105108	2.732384	ENSG00000114023	-1.302456917	down	7.50E-07	8.74E-06	FAM162A
ENSG00000114115.10_6	0	0	0	9	9	13	0	0	0	0.105626	0.065766	0.108387	ENSG00000114115	5.503467819	up	0.012173496	0.046663752	RBP1
ENSG00000114120.14_7	6757	4044	5301	2172	3179	3132	42.661545	49.302639	47.495815	9.931201	19.077467	17.51609	ENSG00000114120	-1.214040736	down	3.54E-14	1.11E-12	SLC25A36
ENSG00000114127.10_8	496	390	483	198	246	214	1.374564	2.57704	1.743421	1.172185	1.42978	0.99369	ENSG00000114127	-1.36321833	down	8.97E-08	1.22E-06	XRN1
ENSG00000114268.12_6	998	351	594	156	158	283	4.089454	2.734435	2.996831	0.758043	0.675575	1.480187	ENSG00000114268	-1.928063468	down	5.91E-11	1.26E-09	PFKFB4
ENSG00000114349.10_6	24	0	13	0	0	0	0.083321	0	0.051343	0	0	0	ENSG00000114349	-6.116039559	down	0.008316652	0.034153543	GNAT1
ENSG00000114383.10_6	103	34	86	161	232	422	0.64857	0.43845	0.692943	1.174136	1.854096	3.437324	ENSG00000114383	1.633029806	up	5.71E-05	0.000445715	TUSC2
ENSG00000114520.11_8	144	84	122	196	255	543	0.585896	0.806936	0.659208	1.058707	1.327723	2.745411	ENSG00000114520	1.204644385	up	0.001101513	0.006125136	SNX4
ENSG00000114544.16_6	247	158	191	540	533	533	1.285205	2.253267	1.221682	3.262236	3.419823	3.462532	ENSG00000114544	1.154658472	up	5.44E-06	5.34E-05	SLC41A3
ENSG00000114698.15_6	82	74	60	27	25	7	0.364419	0.569643	0.252914	0.098308	0.121274	0.025686	ENSG00000114698	-2.176525031	down	0.000944378	0.005379351	PLSCR4
ENSG00000114767.7_5	359	163	301	864	1086	995	2.340578	2.28587	2.621559	6.833493	8.536177	8.200006	ENSG00000114767	1.598897134	up	5.96E-14	1.83E-12	RRP9
ENSG00000114784.4_4	1003	526	847	2831	3583	2840	10.225956	11.551947	11.631399	35.165798	44.086426	36.753994	ENSG00000114784	1.708825054	up	7.38E-23	4.87E-21	EIF1B
ENSG00000114904.13_5	1070	544	643	369	435	533	1.867817	1.947271	2.383331	0.962605	1.569958	1.562287	ENSG00000114904	-1.025569646	down	9.26E-06	8.60E-05	NEK4
ENSG00000114942.14_4	5001	1947	3018	8513	9331	7718	61.080715	51.265835	48.433075	122.992287	132.438599	117.447327	ENSG00000114942	1.14401179	up	4.25E-09	6.98E-08	EEF1B2
ENSG00000114993.17_7	404	271	276	180	137	161	1.813683	2.36238	1.761465	0.864457	0.64046	0.825652	ENSG00000114993	-1.272923269	down	4.52E-05	0.000359492	RTKN
ENSG00000115009.13_6	51	11	58	8	11	0	0.600004	0.276427	0.918594	0.132107	0.146808	0	ENSG00000115009	-2.784430552	down	0.007059957	0.029828225	CCL20
ENSG00000115109.14_4	83	53	136	313	445	521	0.275736	0.172275	0.277769	0.762862	1.218224	1.111373	ENSG00000115109	1.964608484	up	1.93E-09	3.36E-08	EPB41L5
ENSG00000115159.16_4	456	339	542	140	334	289	0.797407	1.511246	1.327721	0.287557	1.03864	0.606198	ENSG00000115159	-1.128058281	down	0.000143978	0.001026144	GPD2
ENSG00000115204.15_7	8852	4453	6914	22688	21717	17880	91.296761	98.360435	95.395973	292.99646	274.321564	235.410141	ENSG00000115204	1.390286896	up	5.87E-15	2.01E-13	MPV17
ENSG00000115232.14_6	469	303	593	194	243	334	1.293182	1.058201	2.907505	0.364915	0.469429	1.160395	ENSG00000115232	-1.103291458	down	3.76E-05	0.00030499	ITGA4
ENSG00000115267.8_7	817	475	819	133	171	342	2.414258	2.943582	3.118855	0.449267	0.570608	1.220684	ENSG00000115267	-1.998055963	down	9.36E-12	2.22E-10	IFIH1
ENSG00000115289.14_6	343	143	266	726	546	519	3.549714	2.958289	3.585158	9.425958	6.949237	6.875176	ENSG00000115289	1.051455385	up	0.0001833	0.001275216	PCGF1
ENSG00000115317.11_3	243	53	100	204	397	466	1.336068	0.555994	0.59963	1.820529	2.498868	2.581105	ENSG00000115317	1.229274116	up	0.002047445	0.01047917	HTRA2
ENSG00000115318.12_7	1922	875	1463	323	214	336	6.297461	5.817718	6.295671	1.068141	0.932925	1.408252	ENSG00000115318	-2.509395463	down	6.25E-26	5.00E-24	LOXL3
ENSG00000115325.13_3	1359	844	1118	394	395	517	6.612223	9.224802	7.862157	2.656254	2.540292	3.398307	ENSG00000115325	-1.627291331	down	6.87E-16	2.51E-14	DOK1
ENSG00000115353.11_5	536	223	624	18	38	34	1.323288	1.062067	2.018309	0.044473	0.094943	0.089862	ENSG00000115353	-4.175996671	down	2.74E-32	2.97E-30	TACR1
ENSG00000115363.14_6	3387	1941	3174	1397	1682	1452	21.52487	24.973291	26.360359	14.376516	16.686659	13.024207	ENSG00000115363	-1.168034391	down	2.52E-13	7.19E-12	EVA1A
ENSG00000115365.12_6	240	92	204	403	535	657	0.552845	0.415968	0.90513	1.13454	1.562761	1.90047	ENSG00000115365	1.339825894	up	1.08E-06	1.22E-05	LANCL1
ENSG00000115414.20_8	39256	26600	39020	3264	3527	4942	49.500092	71.231377	66.920364	4.871648	5.213202	7.930351	ENSG00000115414	-3.452210363	down	1.98E-99	1.67E-96	FN1
ENSG00000115415.20_9	13895	7335	13135	1196	1414	2152	38.056137	40.47657	46.377365	3.865437	4.567819	6.976412	ENSG00000115415	-3.117473732	down	4.23E-65	1.28E-62	STAT1
ENSG00000115425.14_6	489	176	285	908	912	1025	2.788857	2.556716	2.497944	6.539983	6.409997	9.294132	ENSG00000115425	1.368180599	up	2.13E-08	3.17E-07	PECR
ENSG00000115446.11_3	1074	403	1010	2872	2941	2461	9.3974	7.011112	11.82677	29.514183	30.232567	26.919941	ENSG00000115446	1.537897494	up	1.31E-12	3.41E-11	UNC50
ENSG00000115457.10_7	598	347	574	160	144	228	4.299389	5.324719	5.457982	1.385029	1.171519	2.04776	ENSG00000115457	-1.778792758	down	1.22E-11	2.85E-10	IGFBP2
ENSG00000115461.5_7	34367	25134	27435	3352	3003	5392	55.443405	87.594383	59.179611	6.554322	5.832273	10.990633	ENSG00000115461	-3.202295497	down	1.22E-53	2.91E-51	IGFBP5
ENSG00000115468.12_5	111	67	142	28	10	78	0.727641	0.770214	1.308036	0.178771	0.062747	0.524761	ENSG00000115468	-1.74078861	down	0.005035858	0.022479468	EFHD1
ENSG00000115484.15_5	4468	2005	3255	10104	13709	11114	22.77627	21.474731	22.667862	60.059544	80.551186	67.554169	ENSG00000115484	1.603229419	up	3.38E-22	2.06E-20	CCT4
ENSG00000115524.17_5	6688	4252	6298	2181	3772	3950	10.89824	14.719002	14.000394	4.808287	6.968585	7.96333	ENSG00000115524	-1.100268967	down	8.69E-10	1.59E-08	SF3B1
ENSG00000115594.12_8	49	101	254	11	50	11	0.205582	0.628708	0.782892	0.043987	0.115809	0.026486	ENSG00000115594	-2.832204981	down	2.66E-05	0.000223067	IL1R1
ENSG00000115602.17_7	0	0	0	7	28	24	0	0	0	0.020699	0.084019	0.074299	ENSG00000115602	6.385893886	up	0.000524752	0.003219851	IL1RL1
ENSG00000115694.15_6	1137	492	1251	2628	2831	3136	5.254782	5.07445	8.189201	13.979974	17.599125	17.524549	ENSG00000115694	1.357247179	up	7.56E-12	1.81E-10	STK25
ENSG00000115738.10_5	4434	1813	3153	876	969	1116	32.793915	29.861589	32.83316	8.264603	9.147583	11.044498	ENSG00000115738	-1.895331216	down	2.45E-25	1.85E-23	ID2
ENSG00000115758.13_9	390	291	373	703	978	1281	1.58241	2.549824	2.021659	3.460786	4.784574	6.567913	ENSG00000115758	1.173229522	up	4.78E-07	5.78E-06	ODC1
ENSG00000115840.14_7	325	227	344	145	238	129	2.105355	1.972755	2.381407	1.630754	2.5895	1.00345	ENSG00000115840	-1.094604073	down	0.000536355	0.003279961	SLC25A12
ENSG00000115841.21_6	135	190	209	81	14	39	0.685893	2.033207	1.391719	0.469159	0.077196	0.223452	ENSG00000115841	-2.289813405	down	5.10E-05	0.000401765	RMDN2
ENSG00000115902.11_4	291	125	332	1484	1867	2121	0.538093	0.590503	0.770426	3.182206	3.918856	4.656965	ENSG00000115902	2.638418094	up	1.16E-32	1.28E-30	SLC1A4
ENSG00000115946.8_4	506	309	584	1144	2055	1257	2.26736	3.074113	3.504403	6.270109	11.209492	7.259473	ENSG00000115946	1.398951062	up	2.06E-09	3.54E-08	PNO1
ENSG00000115963.13_4	595	261	702	3946	9678	4764	2.212077	2.054657	3.658751	17.883774	43.556202	22.41885	ENSG00000115963	3.318792414	up	2.17E-35	2.64E-33	RND3
ENSG00000116016.14_6	1015	558	944	1926	2222	2849	2.181775	2.408301	2.461682	4.810514	5.548096	7.097447	ENSG00000116016	1.20941519	up	6.42E-12	1.55E-10	EPAS1
ENSG00000116017.6	57	53	41	6	28	23	0.278038	0.422843	0.092034	0.071673	0.173676	0.048126	ENSG00000116017	-1.802263231	down	0.011641922	0.045013526	ARID3A
ENSG00000116106.12_8	452	227	313	82	193	166	0.822268	0.774934	0.732045	0.314699	0.411793	0.349138	ENSG00000116106	-1.455258064	down	6.73E-06	6.48E-05	EPHA4
ENSG00000116120.11_6	3216	2142	3194	6437	8999	6952	4.785728	6.877066	6.354431	11.619429	16.134838	13.068766	ENSG00000116120	1.104048421	up	1.05E-11	2.48E-10	FARSB
ENSG00000116128.11_6	573	204	349	77	71	58	0.948518	0.713589	0.756917	0.151486	0.138398	0.118899	ENSG00000116128	-2.647680677	down	3.23E-15	1.12E-13	BCL9
ENSG00000116132.12_5	659	461	567	150	273	261	2.103534	3.229189	2.436414	0.532791	0.953155	1.002644	ENSG00000116132	-1.619204113	down	3.44E-10	6.65E-09	PRRX1
ENSG00000116133.13_6	3221	1256	1858	550	836	608	7.651825	6.340715	5.903159	1.522965	2.389419	1.789748	ENSG00000116133	-1.89963374	down	9.08E-18	3.84E-16	DHCR24
ENSG00000116161.18_5	11387	5267	8314	21482	24254	20422	41.409508	41.522633	41.614643	92.752724	113.140404	97.492592	ENSG00000116161	1.171047078	up	6.91E-13	1.86E-11	CACYBP
ENSG00000116171.19_6	2434	2170	2777	1376	1348	1448	16.984371	20.847666	16.930298	8.680058	12.284595	13.151446	ENSG00000116171	-1.133981987	down	7.50E-09	1.19E-07	SCP2
ENSG00000116183.11_4	12	0	19	141	75	135	0.012468	0	0.025784	0.177076	0.092716	0.176512	ENSG00000116183	3.387834544	up	2.49E-06	2.61E-05	PAPPA2
ENSG00000116194.13_6	24	33	30	2	0	0	0.066903	0.263465	0.115563	0.005282	0	0	ENSG00000116194	-5.763637449	down	4.51E-05	0.000358905	ANGPTL1
ENSG00000116288.13_5	76805	32264	54476	137934	141916	114650	862.742432	649.615601	704.498779	1653.9823	1601.026123	1324.98877	ENSG00000116288	1.055139091	up	5.91E-09	9.50E-08	PARK7
ENSG00000116455.14_6	1884	953	1695	3530	5093	3444	8.762945	8.811572	9.695813	19.566216	26.946363	19.576769	ENSG00000116455	1.164703124	up	3.19E-10	6.20E-09	WDR77
ENSG00000116489.13_4	25820	11948	19516	57668	62282	55392	110.267494	110.141022	111.383362	298.572754	320.260223	298.592499	ENSG00000116489	1.381405975	up	2.14E-18	9.56E-17	CAPZA1
ENSG00000116539.13_7	1020	752	1126	249	410	475	1.178278	2.147739	1.917248	0.468281	0.455851	0.902144	ENSG00000116539	-1.666858286	down	5.14E-13	1.41E-11	ASH1L
ENSG00000116584.20_8	703	487	729	1610	2244	2385	2.759947	4.725796	3.925464	8.082634	11.011531	12.034265	ENSG00000116584	1.40459094	up	1.10E-14	3.64E-13	ARHGEF2
ENSG00000116586.12_4	6498	2994	5238	20278	15115	12369	105.616417	104.684341	113.059319	398.360565	295.078674	254.996689	ENSG00000116586	1.494391989	up	1.27E-11	2.96E-10	LAMTOR2
ENSG00000116649.10_8	313	143	258	547	939	880	2.514327	2.510106	2.764251	5.45656	9.13227	8.907923	ENSG00000116649	1.469839751	up	1.39E-09	2.47E-08	SRM
ENSG00000116678.20_5	70	50	56	106	237	157	0.093291	0.166699	0.114286	0.212418	0.51455	0.367522	ENSG00000116678	1.185445977	up	0.005359806	0.023617366	LEPR
ENSG00000116701.15_4	59	20	31	351	336	352	0.259274	0.226974	0.185066	1.903264	1.859312	1.996437	ENSG00000116701	3.024646571	up	1.07E-16	4.16E-15	NCF2
ENSG00000116711.10_4	232	89	104	19	0	17	0.810616	0.666841	0.481702	0.078063	0	0.070698	ENSG00000116711	-3.746335225	down	9.01E-08	1.22E-06	PLA2G4A
ENSG00000116717.13_5	454	299	478	712	1421	920	3.373199	4.783823	4.74278	6.427773	12.757721	8.790268	ENSG00000116717	1.016728911	up	2.94E-05	0.000243985	GADD45A
ENSG00000116761.12_4	46	51	88	1091	1808	1629	0.22299	0.526269	0.561285	6.625333	10.698455	10.145815	ENSG00000116761	4.294131904	up	1.03E-54	2.58E-52	CTH
ENSG00000116852.14_5	107	161	160	335	444	440	0.108706	0.351133	0.216749	0.412437	0.542731	0.564491	ENSG00000116852	1.126012181	up	0.001030996	0.00578932	KIF21B
ENSG00000116871.15_8	1258	705	1392	2754	2804	3159	3.704603	4.676376	5.714348	9.784482	10.165277	11.997654	ENSG00000116871	1.128843238	up	8.62E-11	1.81E-09	MAP7D1
ENSG00000116954.8_5	338	214	344	591	881	817	1.26718	1.720231	1.717662	2.692033	3.983778	3.883223	ENSG00000116954	1.069339192	up	1.25E-06	1.40E-05	RRAGC
ENSG00000116984.13_6	797	414	674	296	300	344	0.824457	0.919654	0.873472	0.357704	0.346168	0.432008	ENSG00000116984	-1.254421634	down	1.15E-08	1.79E-07	MTR
ENSG00000117000.9_4	1668	887	1148	511	709	648	2.692727	3.088389	2.477629	0.999237	1.379178	1.321214	ENSG00000117000	-1.25873907	down	1.26E-10	2.61E-09	RLF
ENSG00000117016.10_5	95	38	46	116	152	234	0.130507	0.111279	0.083541	0.194799	0.253766	0.408852	ENSG00000117016	1.229502256	up	0.004892397	0.021934479	RIMS3
ENSG00000117114.20_8	371	190	455	108	106	143	0.552898	0.728766	1.042575	0.218529	0.223866	0.272871	ENSG00000117114	-1.746891801	down	1.48E-08	2.25E-07	ADGRL2
ENSG00000117118.10_4	8156	2856	4651	15333	16992	11394	81.084152	61.184395	61.873554	184.721359	203.252655	142.87616	ENSG00000117118	1.284489097	up	8.30E-09	1.31E-07	SDHB
ENSG00000117143.13_6	2256	1472	2288	15298	31925	16220	10.849781	14.742304	14.455531	89.634315	190.459106	101.040146	ENSG00000117143	3.106640986	up	2.10E-44	3.61E-42	UAP1
ENSG00000117151.13_6	1909	965	1653	602	686	994	9.751533	11.20265	12.406575	3.101005	4.5432	6.993286	ENSG00000117151	-1.248475024	down	3.77E-10	7.27E-09	CTBS
ENSG00000117152.13_5	1606	984	1420	399	738	555	5.047992	6.67498	5.957162	1.521669	2.792314	2.202972	ENSG00000117152	-1.536260323	down	2.41E-13	6.91E-12	RGS4
ENSG00000117228.10_5	3226	1559	2548	327	468	603	12.501386	12.220432	12.712577	1.658692	2.114133	2.814941	ENSG00000117228	-2.655658553	down	5.96E-41	9.02E-39	GBP1
ENSG00000117266.15_6	252	158	137	67	36	56	1.259073	1.85727	0.833975	0.27119	0.17958	0.261635	ENSG00000117266	-2.052559055	down	2.14E-06	2.28E-05	CDK18
ENSG00000117305.15_7	3365	1681	2654	7214	7424	6511	22.10078	22.26054	24.21258	60.793488	59.423168	56.18578	ENSG00000117305	1.219099941	up	2.91E-13	8.21E-12	HMGCL
ENSG00000117318.9_5	112438	44453	65311	22530	29391	19564	1193.002075	1017.632202	926.163879	289.833252	376.007538	262.390533	ENSG00000117318	-1.857896653	down	5.71E-20	2.98E-18	ID3
ENSG00000117395.12_6	2801	1097	2288	8426	10074	8152	21.471388	18.094793	23.382263	78.158325	92.826927	78.871727	ENSG00000117395	1.894576947	up	4.38E-25	3.28E-23	EBNA1BP2
ENSG00000117461.15_6	1469	1072	1132	302	560	546	2.657073	12.787177	3.561929	0.655643	1.211877	1.241251	ENSG00000117461	-1.715195065	down	2.54E-13	7.22E-12	PIK3R3
ENSG00000117472.10_4	671	427	684	240	235	185	4.293018	5.728991	5.895793	2.065845	2.114198	1.605807	ENSG00000117472	-1.689777663	down	2.05E-11	4.63E-10	TSPAN1
ENSG00000117543.21_7	291	144	293	467	685	634	2.460157	2.388834	3.022826	3.708374	6.066628	6.504747	ENSG00000117543	1.041840331	up	1.71E-05	0.000149803	DPH5
ENSG00000117586.11_6	561	303	343	170	178	163	2.231665	2.202462	1.755183	1.089473	0.931991	0.758435	ENSG00000117586	-1.502649348	down	8.84E-08	1.20E-06	TNFSF4
ENSG00000117600.12_4	33	25	27	0	0	0	0.06124	0.100031	0.065678	0	0	0	ENSG00000117600	-7.5738037	down	1.18E-06	1.33E-05	PLPPR4
ENSG00000117643.14_4	88	49	69	22	34	38	0.188563	0.226516	0.197656	0.057679	0.086787	0.103684	ENSG00000117643	-1.414811924	down	0.0090532	0.036630236	MAN1C1
ENSG00000117862.13_6	10222	3496	6567	16897	17409	16912	72.621056	53.587894	62.375324	145.687119	149.037262	151.943344	ENSG00000117862	1.138249573	up	4.20E-09	6.91E-08	TXNDC12
ENSG00000117877.10_6	378	379	481	809	1208	1248	1.462488	3.148401	2.229924	3.150415	4.805562	4.993169	ENSG00000117877	1.056918916	up	1.14E-05	0.000103975	CD3EAP
ENSG00000117984.14_7	31591	12666	15896	7925	7143	8396	176.604858	136.078659	104.114746	49.032543	42.144054	51.936882	ENSG00000117984	-1.581310532	down	1.64E-14	5.32E-13	CTSD
ENSG00000118137.9_4	97	95	49	30	16	43	0.786369	1.884834	0.602388	0.292961	0.157955	0.437223	ENSG00000118137	-1.807023742	down	0.002934908	0.014205145	APOA1
ENSG00000118263.15_6	555	273	420	932	1267	1118	0.891558	1.49001	0.809069	1.632952	2.093754	1.724844	ENSG00000118263	1.154371042	up	9.49E-09	1.49E-07	KLF7
ENSG00000118292.9_4	178	142	224	32	21	19	3.201421	5.552114	5.615012	0.302771	0.311726	0.190751	ENSG00000118292	-3.182501811	down	7.87E-13	2.10E-11	C1orf54
ENSG00000118298.12_5	49	53	64	29	19	21	0.314124	0.725389	0.556214	0.207323	0.139906	0.163255	ENSG00000118298	-1.574750302	down	0.012099674	0.046410182	CA14
ENSG00000118495.20_7	272	230	293	103	114	201	0.616352	1.596991	1.359742	0.251236	0.292616	0.532496	ENSG00000118495	-1.255967584	down	0.000192403	0.001330696	PLAGL1
ENSG00000118503.15_8	87	71	200	7	5	22	0.25348	0.402104	0.718344	0.017024	0.010395	0.073171	ENSG00000118503	-3.6806733	down	6.28E-09	1.01E-07	TNFAIP3
ENSG00000118507.17_6	63	94	60	42	21	31	0.288416	0.914391	0.254579	0.187256	0.103097	0.122883	ENSG00000118507	-1.584711185	down	0.00917582	0.037006343	AKAP7
ENSG00000118508.5_4	230	135	238	854	1320	1440	2.167773	2.735935	2.994575	9.780898	15.021607	17.181808	ENSG00000118508	2.302817373	up	3.98E-25	2.99E-23	RAB32
ENSG00000118640.11_4	151	66	117	29	48	62	2.224399	2.081674	2.317696	0.511948	0.862747	1.150887	ENSG00000118640	-1.523500648	down	0.000996683	0.005631091	VAMP8
ENSG00000118733.17_4	5	7	16	0	0	0	0.012715	0.043177	0.067948	0	0	0	ENSG00000118733	-5.965923897	down	0.005407979	0.023811855	OLFM3
ENSG00000118894.15_6	297	113	346	539	747	705	1.773729	1.436631	1.980505	3.135386	4.12329	3.806874	ENSG00000118894	1.180297666	up	1.59E-05	0.000140498	EEF2KMT
ENSG00000118939.17_8	9414	3245	6175	25141	23844	20821	108.470299	85.282768	94.60466	362.194092	336.352325	297.388794	ENSG00000118939	1.700485205	up	9.84E-17	3.86E-15	UCHL3
ENSG00000118946.12_4	445	200	434	179	118	143	0.539199	0.520725	0.702556	0.538289	0.171245	0.218052	ENSG00000118946	-1.497580026	down	2.25E-06	2.38E-05	PCDH17
ENSG00000118971.8_6	1412	806	1656	5955	8015	7235	2.20324	2.717317	3.449369	11.622716	15.012941	14.198336	ENSG00000118971	2.195037852	up	4.43E-39	6.34E-37	CCND2
ENSG00000118972.3_6	28	0	16	0	0	0	0.09206	0	0.105857	0	0	0	ENSG00000118972	-6.36744573	down	0.003850141	0.017897319	FGF23
ENSG00000119231.11_8	8634	4882	8496	19758	19900	17451	14.944897	17.82753	19.933828	39.432537	39.416431	36.033386	ENSG00000119231	1.130293468	up	2.21E-12	5.60E-11	SENP5
ENSG00000119335.17_4	61057	42079	53556	378260	349417	295713	209.902847	312.338745	246.294113	1619.922119	1486.233643	1318.703247	ENSG00000119335	2.433854289	up	2.03E-41	3.09E-39	SET
ENSG00000119383.19_10	5650	3951	4939	2733	2499	2747	21.872202	33.413193	25.677647	13.450492	12.11525	13.284337	ENSG00000119383	-1.150216771	down	2.71E-11	6.05E-10	PTPA
ENSG00000119397.16_4	500	308	666	230	300	272	0.903175	1.072581	1.215281	0.474262	0.576544	0.729589	ENSG00000119397	-1.137616873	down	8.57E-06	8.04E-05	CNTRL
ENSG00000119408.16_6	1562	781	1187	2839	3398	4418	6.164243	5.342922	6.785661	10.377883	13.861449	21.177208	ENSG00000119408	1.330835059	up	4.57E-14	1.42E-12	NEK6
ENSG00000119514.7_5	12	0	8	74	79	53	0.04271	0	0.034133	0.421333	0.403991	0.288982	ENSG00000119514	3.255937073	up	7.65E-05	0.000580163	GALNT12
ENSG00000119523.10_5	451	403	704	1126	1363	2447	2.179335	3.107656	3.591286	4.884506	5.875514	10.89034	ENSG00000119523	1.343190431	up	5.75E-07	6.86E-06	ALG2
ENSG00000119599.17_7	33	28	38	98	200	157	0.118216	0.228177	0.19807	0.469048	0.972544	0.816968	ENSG00000119599	1.876226961	up	4.71E-05	0.000372636	DCAF4
ENSG00000119655.11_6	53917	17893	28573	11336	10818	11007	663.791504	473.972229	468.091827	167.810562	160.66832	171.121292	ENSG00000119655	-1.792726223	down	1.42E-17	5.86E-16	NPC2
ENSG00000119673.14_5	541	213	546	1218	1208	1650	3.272765	2.753731	4.303334	8.874822	8.881344	12.86743	ENSG00000119673	1.431986944	up	5.99E-10	1.13E-08	ACOT2
ENSG00000119681.12_8	249	91	198	85	90	75	0.295727	0.243601	0.313607	0.133849	0.127373	0.111882	ENSG00000119681	-1.308334008	down	0.000515446	0.003173475	LTBP2
ENSG00000119685.20_5	1137	637	747	307	455	426	3.554374	3.490888	2.752599	1.320952	2.032436	1.550441	ENSG00000119685	-1.370425509	down	7.81E-10	1.44E-08	TTLL5
ENSG00000119699.7_4	2319	1404	2139	262	457	475	10.021068	13.933988	12.386709	1.345931	2.267395	2.483278	ENSG00000119699	-2.588438283	down	2.66E-38	3.63E-36	TGFB3
ENSG00000119705.10_8	33369	19636	29991	87521	80908	50744	823.302673	1055.207153	989.462097	2615.836914	2375.723877	1606.082764	ENSG00000119705	1.162041124	up	6.70E-08	9.26E-07	SLIRP
ENSG00000119718.11_5	5572	2725	4647	10376	12914	9590	14.525485	15.526917	16.245014	31.034727	37.454437	29.393202	ENSG00000119718	1.104969265	up	4.57E-11	9.95E-10	EIF2B2
ENSG00000119737.6_6	26	22	10	4	4	0	0.121015	0.227582	0.058502	0.018186	0.023158	0	ENSG00000119737	-3.175067113	down	0.012472028	0.047537901	GPR75
ENSG00000119778.15_8	238	69	168	36	71	76	0.359255	0.185537	0.340462	0.107043	0.104833	0.123162	ENSG00000119778	-1.5927594	down	0.000291903	0.001920393	ATAD2B
ENSG00000119801.13_4	1348	909	1380	3993	4745	4691	5.954291	9.159075	8.61345	21.600708	24.665045	26.177259	ENSG00000119801	1.60230718	up	4.68E-25	3.49E-23	YPEL5
ENSG00000119812.19_6	1614	933	1326	504	627	703	6.028684	9.023583	8.022282	2.324051	2.981069	3.222825	ENSG00000119812	-1.355449421	down	9.80E-14	2.95E-12	FAM98A
ENSG00000119899.13_5	700	482	650	269	369	318	2.146665	3.31338	2.654841	1.018253	1.355898	1.238264	ENSG00000119899	-1.23221207	down	3.77E-08	5.43E-07	SLC17A5
ENSG00000119917.14_4	26684	11480	17464	2366	2618	1995	112.274452	103.354538	97.651932	12.05313	13.270411	10.608608	ENSG00000119917	-3.218723096	down	3.05E-66	9.60E-64	IFIT3
ENSG00000119922.10_6	4363	1588	2789	417	613	465	13.240653	10.115866	11.161347	1.464463	2.170799	1.74114	ENSG00000119922	-2.767060826	down	1.21E-38	1.68E-36	IFIT2
ENSG00000119969.15_5	2710	1684	2914	1180	1398	1343	9.707906	13.561172	14.356282	4.880411	6.882322	6.934146	ENSG00000119969	-1.165699008	down	7.79E-13	2.08E-11	HELLS
ENSG00000120051.15_6	78	61	104	431	1009	466	0.239826	0.406543	0.428352	1.614404	3.760831	1.816086	ENSG00000120051	2.667782607	up	6.41E-15	2.18E-13	CFAP58
ENSG00000120053.12_6	2327	945	1869	8665	13553	9914	11.838837	10.50049	12.771131	53.50565	83.068481	63.734718	ENSG00000120053	2.413406319	up	2.23E-38	3.08E-36	GOT1
ENSG00000120093.11_5	242	200	222	61	103	86	0.60383	1.028746	0.706746	0.260727	0.449393	0.311094	ENSG00000120093	-1.740118472	down	6.46E-07	7.62E-06	HOXB3
ENSG00000120254.15_7	299	195	363	1031	1226	1091	1.606202	2.309709	2.377797	6.328516	6.42169	6.235831	ENSG00000120254	1.7002138	up	2.04E-15	7.15E-14	MTHFD1L
ENSG00000120306.11_6	7019	3607	5562	22671	17463	17782	91.719154	99.96273	96.665695	353.232605	270.519897	288.399078	ENSG00000120306	1.610596855	up	1.74E-17	7.14E-16	CYSTM1
ENSG00000120337.8_4	0	4	0	53	111	45	0	0.032874	0	0.318834	0.669275	0.279196	ENSG00000120337	5.206809247	up	1.44E-06	1.58E-05	TNFSF18
ENSG00000120471.15_4	31	0	6	0	0	0	0.097175	0	0.025607	0	0	0	ENSG00000120471	-6.088738607	down	0.009954929	0.039559951	TP53AIP1
ENSG00000120549.18_7	470	261	513	156	229	252	0.871233	0.762008	1.042184	0.265324	0.371623	0.485872	ENSG00000120549	-1.232750415	down	2.87E-06	2.98E-05	KIAA1217
ENSG00000120690.16_7	379	309	381	202	177	201	1.436725	2.824043	1.667121	1.090252	0.952257	0.837329	ENSG00000120690	-1.180717904	down	2.84E-05	0.000236971	ELF1
ENSG00000120693.13_6	327	267	272	141	108	147	0.587279	1.030481	0.6532	0.305981	0.23206	0.333557	ENSG00000120693	-1.43686908	down	9.07E-06	8.45E-05	SMAD9
ENSG00000120699.13_5	7731	3403	6504	26133	31974	22528	63.178947	60.481834	70.893341	261.599518	315.424744	228.760513	ENSG00000120699	1.969848961	up	1.08E-27	9.68E-26	EXOSC8
ENSG00000120708.17_7	202233	77713	106619	48899	43404	54091	760.578674	640.642029	540.577759	223.671112	196.291183	256.902802	ENSG00000120708	-1.618057521	down	1.01E-15	3.64E-14	TGFBI
ENSG00000120738.8_4	7914	9010	7132	1043	824	805	25.378981	62.363892	30.57975	4.055373	3.182165	3.258341	ENSG00000120738	-3.522225381	down	2.82E-43	4.59E-41	EGR1
ENSG00000120837.8_8	661	425	693	1916	1952	2161	2.08091	2.856331	2.777507	7.056192	7.210255	8.307136	ENSG00000120837	1.492004968	up	5.87E-17	2.34E-15	NFYB
ENSG00000120889.13_5	392	226	387	1358	1798	1781	1.165452	1.2303	1.292251	4.140573	5.481864	5.860263	ENSG00000120889	2.027612548	up	5.69E-28	5.20E-26	TNFRSF10B
ENSG00000121005.9_4	620	334	388	102	103	207	1.464721	1.68678	1.33424	0.287531	0.28928	0.611958	ENSG00000121005	-1.989909303	down	4.08E-10	7.83E-09	CRISPLD1
ENSG00000121039.10_4	866	455	956	337	237	369	2.206832	2.490056	3.499056	1.037456	0.725326	1.211948	ENSG00000121039	-1.502414066	down	4.36E-09	7.14E-08	RDH10
ENSG00000121064.13_7	4399	2496	3360	1974	2010	1913	23.303299	29.14698	23.987225	12.743391	13.036525	12.889483	ENSG00000121064	-1.058677568	down	2.74E-10	5.39E-09	SCPEP1
ENSG00000121152.10_6	2241	1184	1859	414	906	1009	4.604056	8.083565	6.910875	2.147065	2.684072	2.336478	ENSG00000121152	-1.473112848	down	6.28E-10	1.18E-08	NCAPH
ENSG00000121236.21_6	142	73	144	56	40	67	0.587322	0.588195	0.565863	0.280683	0.140859	0.301868	ENSG00000121236	-1.376081251	down	0.001828657	0.009499437	TRIM6
ENSG00000121440.15_5	242	117	284	0	12	15	0.683503	0.957099	1.118388	0	0.032853	0.043894	ENSG00000121440	-4.857450084	down	7.14E-18	3.05E-16	PDZRN3
ENSG00000121552.4_4	0	4	8	57	48	38	0	0.101956	0.136932	0.914504	0.759181	0.63612	ENSG00000121552	3.251520099	up	0.000982107	0.005562051	CSTA
ENSG00000121691.7_6	7780	3561	4911	1024	1751	1367	35.532383	35.200687	30.298555	6.386285	10.132977	8.801172	ENSG00000121691	-2.231825846	down	1.25E-30	1.29E-28	CAT
ENSG00000121858.11_5	4501	2182	4270	245	200	343	27.091679	27.453836	33.527405	1.63235	1.80249	2.749038	ENSG00000121858	-4.035622621	down	2.21E-83	1.11E-80	TNFSF10
ENSG00000121895.8_7	0	0	0	52	75	14	0	0	0	0.597636	0.945126	0.089012	ENSG00000121895	7.716330188	up	4.65E-07	5.63E-06	TMEM156
ENSG00000121900.19_5	381	120	363	863	978	1381	3.719007	2.519953	4.724079	10.448919	11.568806	17.265289	ENSG00000121900	1.693752512	up	2.83E-10	5.53E-09	TMEM54
ENSG00000121957.14_7	461	394	447	184	197	231	1.557148	1.954072	2.078186	0.851066	0.77889	1.098818	ENSG00000121957	-1.409778517	down	1.40E-07	1.84E-06	GPSM2
ENSG00000121989.15_4	997	673	1220	507	671	519	2.043822	2.956496	3.480743	1.221412	1.632843	1.297839	ENSG00000121989	-1.040256674	down	1.05E-06	1.19E-05	ACVR2A
ENSG00000122008.15_4	484	310	493	146	311	323	1.266087	2.674362	2.473653	0.558805	1.393352	0.851168	ENSG00000122008	-1.027657305	down	0.000326876	0.002127354	POLK
ENSG00000122034.16_7	8489	4420	8763	15526	20313	27934	62.460857	71.332787	89.68116	138.308762	181.804535	266.424469	ENSG00000122034	1.29432035	up	4.75E-13	1.30E-11	GTF3A
ENSG00000122218.16_7	4778	3041	3873	1521	1916	2231	14.98365	19.447477	14.721651	3.967526	6.173939	7.192883	ENSG00000122218	-1.339026537	down	3.94E-16	1.47E-14	COPA
ENSG00000122417.15_10	871	517	831	388	406	451	3.11762	4.179605	4.167096	2.183937	1.776096	1.759338	ENSG00000122417	-1.098191831	down	7.03E-08	9.70E-07	ODF2L
ENSG00000122420.10_6	632	425	648	127	101	99	1.184649	1.699654	1.639971	0.284623	0.225211	0.230692	ENSG00000122420	-2.643079818	down	2.64E-22	1.63E-20	PTGFR
ENSG00000122497.13	4041	2076	3523	1201	1690	2224	13.284527	13.732391	15.726205	4.399769	6.074599	8.831863	ENSG00000122497	-1.184316375	down	2.03E-10	4.08E-09	NA
ENSG00000122507.21_8	191	230	155	57	134	74	0.812524	1.891374	0.790141	0.280795	0.486574	0.291907	ENSG00000122507	-1.528844797	down	0.000453143	0.002832745	BBS9
ENSG00000122545.20_8	30628	18539	21198	8644	14070	13377	87.309692	397.200134	169.317993	61.291515	72.123947	56.051083	ENSG00000122545	-1.264823431	down	7.02E-13	1.89E-11	SEPTIN7
ENSG00000122574.10_2	140	47	223	388	404	293	0.336427	0.238802	0.716673	1.130707	1.1718	0.887884	ENSG00000122574	1.231200691	up	0.001398917	0.007554666	WIPF3
ENSG00000122678.17_6	267	216	400	159	101	193	1.571763	2.951916	2.665347	0.894995	0.464524	1.006163	ENSG00000122678	-1.237805892	down	0.000350331	0.002265631	POLM
ENSG00000122687.19_9	1301	533	667	1877	3415	2350	6.589212	5.867399	4.228554	11.520018	20.55168	14.296064	ENSG00000122687	1.360800234	up	1.06E-08	1.65E-07	MRM2
ENSG00000122691.13_7	90	73	69	31	27	31	0.551075	0.965554	0.563172	0.227636	0.19784	0.469067	ENSG00000122691	-1.694367666	down	0.001491411	0.007981129	TWIST1
ENSG00000122694.16_4	4190	2000	3053	8203	9294	7341	22.389843	22.881124	22.051571	53.695034	62.13216	51.043636	ENSG00000122694	1.188451006	up	7.34E-12	1.76E-10	GLIPR2
ENSG00000122705.17_5	1202	512	1202	2015	2543	3598	10.966619	10.242031	14.715589	22.796749	28.49741	42.235512	ENSG00000122705	1.244970598	up	5.23E-09	8.49E-08	CLTA
ENSG00000122786.20_8	23304	10377	17373	9303	10281	10027	58.825314	54.987373	60.452419	27.061701	29.389673	32.555264	ENSG00000122786	-1.018229793	down	5.21E-11	1.12E-09	CALD1
ENSG00000122824.11_5	212	173	282	662	1094	1130	1.106421	1.95049	1.96729	4.196745	6.885799	7.45979	ENSG00000122824	1.800558283	up	4.71E-13	1.30E-11	NUDT10
ENSG00000122861.16_5	45749	22599	35249	211533	285343	257450	196.601471	209.521866	202.503723	1102.149414	1477.254517	1396.505371	ENSG00000122861	2.609360864	up	1.15E-73	4.44E-71	PLAU
ENSG00000122863.6_4	851	369	598	1573	1584	2018	1.233561	1.15246	1.158993	2.767494	2.769105	3.699013	ENSG00000122863	1.272758703	up	1.67E-10	3.38E-09	CHST3
ENSG00000122877.16_7	95	92	59	21	31	43	0.319991	0.665157	0.26281	0.082927	0.123335	0.181536	ENSG00000122877	-1.756932127	down	0.001596408	0.008447259	EGR2
ENSG00000122884.12_4	10761	5777	7091	2761	3331	4300	38.328777	44.27914	33.653599	11.847621	14.194024	19.209568	ENSG00000122884	-1.46362418	down	1.38E-16	5.33E-15	P4HA1
ENSG00000122958.15_5	895	648	886	2020	3139	2004	2.687376	3.330079	3.006836	5.832649	18.636497	15.893343	ENSG00000122958	1.263015404	up	1.13E-09	2.04E-08	VPS26A
ENSG00000122970.16_6	1089	598	871	320	462	598	3.7914	4.515008	4.028953	1.313121	1.847722	2.588321	ENSG00000122970	-1.173343951	down	1.57E-07	2.05E-06	IFT81
ENSG00000123066.8_8	590	533	650	277	447	294	1.131761	1.818696	1.673949	0.304118	0.996542	0.569645	ENSG00000123066	-1.128481895	down	1.97E-05	0.00017089	MED13L
ENSG00000123095.6_5	2453	1479	2138	559	784	665	13.748764	21.50589	22.354525	3.607779	6.078955	4.411902	ENSG00000123095	-1.874557001	down	2.73E-27	2.35E-25	BHLHE41
ENSG00000123096.11_4	588	318	417	215	201	305	1.808558	2.392058	1.875564	0.600843	0.562877	1.263211	ENSG00000123096	-1.143756286	down	1.70E-05	0.000149255	SSPN
ENSG00000123104.12_7	692	395	779	178	274	289	0.563902	0.758239	1.088332	0.171353	0.266389	0.290882	ENSG00000123104	-1.602582675	down	3.64E-11	8.03E-10	ITPR2
ENSG00000123106.10_9	327	236	494	859	1124	1274	2.188098	4.099874	4.289174	6.149542	9.535648	11.481312	ENSG00000123106	1.34280885	up	1.37E-08	2.10E-07	CCDC91
ENSG00000123130.17_8	1388	740	1187	2630	3166	2698	5.367264	4.710982	6.242448	13.836402	15.929743	16.035776	ENSG00000123130	1.103878713	up	2.83E-11	6.32E-10	ACOT9
ENSG00000123213.23_7	294	188	312	443	687	889	0.754518	0.811608	1.494788	1.656395	1.137033	1.487193	ENSG00000123213	1.050800253	up	4.24E-05	0.000339865	NLN
ENSG00000123360.12_5	16	29	4	0	0	4	0.048735	0.172448	0.016234	0	0	0.009738	ENSG00000123360	-4.187754287	down	0.007621769	0.031825908	PDE1B
ENSG00000123384.14_5	1234	724	786	221	268	432	0.873586	1.129479	0.836444	0.179382	0.280033	0.458721	ENSG00000123384	-1.875458328	down	3.19E-13	8.95E-12	LRP1
ENSG00000123405.14_5	89	45	124	23	23	36	0.52866	0.527813	0.999764	0.147882	0.156037	0.245695	ENSG00000123405	-1.891544529	down	0.000509005	0.003138732	NFE2
ENSG00000123444.14_8	260	159	219	114	83	178	1.105009	1.408806	0.99283	0.444321	0.324059	0.728687	ENSG00000123444	-1.044886272	down	0.003728598	0.017397422	KBTBD4
ENSG00000123472.12_7	347	91	279	393	598	804	1.345947	1.226336	1.283191	1.32156	3.015007	2.690881	ENSG00000123472	1.12026427	up	0.000436317	0.002743542	ATPAF1
ENSG00000123496.8_6	39996	25841	31750	84161	83405	93906	300.57193	419.153595	319.364471	767.404663	752.20282	891.74231	ENSG00000123496	1.139127765	up	1.54E-13	4.53E-12	IL13RA2
ENSG00000123545.6_5	813	370	715	1733	1865	1561	5.193297	3.871097	4.384032	9.095903	16.267534	14.909686	ENSG00000123545	1.217548205	up	9.61E-10	1.74E-08	NDUFAF4
ENSG00000123562.17_8	23121	12929	17002	9956	9091	11697	127.418587	151.957626	124.771248	66.318481	60.054424	80.195114	ENSG00000123562	-1.050907918	down	1.43E-10	2.92E-09	MORF4L2
ENSG00000123610.5_4	1902	1346	1842	418	513	460	13.733809	20.788862	17.515856	3.614922	4.667905	4.171307	ENSG00000123610	-2.163215743	down	5.82E-32	6.24E-30	TNFAIP6
ENSG00000123643.13_6	203	134	221	98	114	125	1.232394	0.50135	0.635273	0.312461	0.239021	0.331197	ENSG00000123643	-1.005600917	down	0.002368793	0.011876671	SLC36A1
ENSG00000123739.11_6	557	385	668	1452	1493	1858	1.476336	1.792205	2.598226	5.193286	5.547674	6.635739	ENSG00000123739	1.300017107	up	4.39E-11	9.61E-10	PLA2G12A
ENSG00000123815.12_8	411	215	273	129	191	128	1.722675	1.974359	1.576052	0.69615	1.040724	0.743572	ENSG00000123815	-1.270230289	down	3.50E-05	0.000286135	COQ8B
ENSG00000123933.17_7	747	386	490	219	195	271	1.863106	2.154577	1.645892	0.669988	0.700354	0.888934	ENSG00000123933	-1.502893337	down	5.60E-09	9.05E-08	MXD4
ENSG00000123989.14_6	1158	508	893	340	396	526	3.844336	4.180294	3.966383	1.574883	1.583657	2.533899	ENSG00000123989	-1.263718222	down	1.17E-08	1.82E-07	CHPF
ENSG00000124097.7_5	818	328	584	115	85	84	12.932128	11.173767	12.34862	2.206028	1.601185	1.665894	ENSG00000124097	-2.807414091	down	2.10E-21	1.22E-19	NA
ENSG00000124102.5_4	121	77	125	14	22	16	2.193835	2.995078	3.028633	0.30067	0.467915	0.361097	ENSG00000124102	-2.913735193	down	1.02E-08	1.60E-07	PI3
ENSG00000124107.5_5	19451	8748	12693	4561	2738	3309	328.346649	318.703461	286.485809	93.39415	55.679382	70.558174	ENSG00000124107	-2.152943976	down	6.19E-21	3.50E-19	SLPI
ENSG00000124194.16_4	14	0	4	92	162	64	0.046517	0	0.015392	0.44512	0.787323	0.359154	ENSG00000124194	4.021426552	up	2.59E-07	3.26E-06	GDAP1L1
ENSG00000124201.15_7	5729	2998	4695	1613	1886	1932	8.145473	9.190633	8.820921	2.794099	3.260749	3.457919	ENSG00000124201	-1.561896589	down	5.92E-26	4.75E-24	ZNFX1
ENSG00000124216.4_4	15	14	3	0	0	0	0.086235	0.173375	0.023564	0	0	0	ENSG00000124216	-6.251658257	down	0.002273884	0.011456784	SNAI1
ENSG00000124299.15_6	4451	2136	2660	1573	1795	1725	23.562504	25.100821	18.850142	10.17724	11.522169	11.563047	ENSG00000124299	-1.112393716	down	2.09E-09	3.59E-08	PEPD
ENSG00000124313.16_9	94	40	126	30	59	15	0.934176	0.51963	1.389165	0.328164	0.470345	0.202791	ENSG00000124313	-1.534591681	down	0.011223494	0.043696284	IQSEC2
ENSG00000124429.18_5	24	28	23	0	0	0	0.06032	0.154992	0.079396	0	0	0	ENSG00000124429	-7.454661084	down	3.09E-06	3.19E-05	POF1B
ENSG00000124479.11_9	1733	747	1101	108	14	34	10.436702	9.934	9.332797	0.753708	0.230395	0.235894	ENSG00000124479	-4.654445434	down	1.41E-07	1.86E-06	NDP
ENSG00000124496.12_5	97	54	166	22	83	43	0.132094	0.151767	0.292007	0.034608	0.130059	0.070064	ENSG00000124496	-1.368418209	down	0.01266175	0.048159944	TRERF1
ENSG00000124562.10_5	22893	7524	12892	45297	46301	40568	284.433167	201.127258	212.262848	695.788391	695.866577	644.351929	ENSG00000124562	1.417999482	up	1.10E-11	2.58E-10	SNRPC
ENSG00000124570.21_7	9433	5096	8565	18550	18365	19887	54.440224	68.095436	78.690018	146.813004	149.277039	174.771744	ENSG00000124570	1.04989007	up	4.88E-13	1.34E-11	SERPINB6
ENSG00000124575.7_4	1161	610	845	162	321	260	15.041289	17.064018	14.636894	2.547844	5.014071	4.255673	ENSG00000124575	-2.097413448	down	5.36E-18	2.31E-16	H1-3
ENSG00000124587.14_5	311	84	242	456	499	633	0.906658	0.527684	0.945884	1.615728	1.753417	2.33469	ENSG00000124587	1.129076235	up	0.000189745	0.001314242	PEX6
ENSG00000124731.13_6	309	219	457	166	74	97	1.080891	2.01848	2.25689	0.878936	0.419393	0.401343	ENSG00000124731	-1.767446994	down	4.45E-06	4.45E-05	TREM1
ENSG00000124733.5_7	50802	24232	33198	98871	93837	81246	394.953278	359.649872	351.109741	927.540527	760.174316	876.453491	ENSG00000124733	1.107118524	up	1.37E-09	2.44E-08	MEA1
ENSG00000124743.6_5	31	70	48	12	16	4	0.053789	0.261053	0.111356	0.025358	0.033386	0.008802	ENSG00000124743	-2.645395824	down	0.000890224	0.005125338	KLHL31
ENSG00000124749.17_8	662	689	1106	67	32	130	1.756601	3.996636	3.764972	0.21659	0.091145	0.391436	ENSG00000124749	-3.746264567	down	2.40E-23	1.66E-21	COL21A1
ENSG00000124762.14_4	7699	5154	5796	2003	2874	1947	36.802269	52.722458	36.946159	11.527454	16.976601	11.784292	ENSG00000124762	-1.747379916	down	7.89E-20	4.05E-18	CDKN1A
ENSG00000124785.9_5	339	210	233	114	103	104	2.086935	2.844578	1.966767	0.872027	0.690249	0.808987	ENSG00000124785	-1.558028971	down	1.51E-06	1.66E-05	NRN1
ENSG00000124787.14_6	509	355	559	2263	2857	2508	3.674143	5.608633	6.358332	21.516094	27.986067	23.927748	ENSG00000124787	2.139996196	up	6.48E-33	7.22E-31	RPP40
ENSG00000124813.23_7	327	151	296	66	242	50	3.590961	2.331579	2.702363	0.785508	1.182703	0.641649	ENSG00000124813	-1.373728287	down	0.003747321	0.017470969	RUNX2
ENSG00000124882.4_4	34	45	41	8	16	16	0.113021	0.227202	0.11811	0.020946	0.041225	0.043847	ENSG00000124882	-1.983123683	down	0.007919347	0.032775958	EREG
ENSG00000125089.17_7	66	43	56	0	19	0	0.299959	0.215781	0.187627	0	0.085439	0	ENSG00000125089	-3.466092775	down	0.001117622	0.006203023	SH3TC1
ENSG00000125148.7_4	66900	25608	36645	14868	15252	11453	1635.366943	1349.215088	1189.662109	440.723663	448.17337	350.225464	ENSG00000125148	-1.842677623	down	3.68E-18	1.61E-16	MT2A
ENSG00000125351.12_8	1682	764	1423	3483	4084	3432	7.278258	7.216839	8.325191	18.206171	21.354008	18.701317	ENSG00000125351	1.276683947	up	2.34E-13	6.73E-12	UPF3B
ENSG00000125355.15_6	371	361	379	16	47	49	1.435903	2.28796	1.486944	0.106436	0.29594	0.181549	ENSG00000125355	-3.684310913	down	4.41E-22	2.65E-20	TMEM255A
ENSG00000125378.16_6	1368	570	1187	264	246	365	8.029087	7.549729	9.265596	1.803399	1.727352	2.798333	ENSG00000125378	-2.061606895	down	8.79E-19	4.08E-17	BMP4
ENSG00000125398.8_6	443	301	366	145	192	124	1.132729	1.661137	1.252289	0.450174	0.58991	0.400861	ENSG00000125398	-1.555812525	down	9.88E-08	1.33E-06	SOX9
ENSG00000125434.11_5	390	108	204	698	652	597	1.523469	1.122448	1.285699	3.19821	2.993041	2.792244	ENSG00000125434	1.297116421	up	1.72E-05	0.000150819	SLC25A35
ENSG00000125454.12_7	969	534	754	2520	3314	2791	6.160546	7.192175	6.458543	18.92523	25.516123	23.144701	ENSG00000125454	1.667520645	up	2.26E-22	1.43E-20	SLC25A19
ENSG00000125510.18_7	0	61	0	0	0	0	0	0.386968	0	0	0	0	ENSG00000125510	-21.68110535	down	2.94E-08	4.30E-07	OPRL1
ENSG00000125618.17_7	237	45	162	50	72	47	0.699784	0.230532	0.735078	0.180716	0.237357	0.142944	ENSG00000125618	-1.545256743	down	0.001494602	0.00799458	PAX8
ENSG00000125637.16_7	454	224	412	126	69	133	0.743785	0.427802	0.48863	0.135019	0.073511	0.148885	ENSG00000125637	-1.957679682	down	4.43E-09	7.24E-08	PSD4
ENSG00000125648.15_6	254	145	250	68	165	115	0.977231	0.903412	1.140398	0.266511	0.80611	0.451014	ENSG00000125648	-1.18541731	down	0.000932479	0.005330869	SLC25A23
ENSG00000125675.18_8	688	328	565	59	137	71	3.51386	3.147163	2.74094	0.331624	1.045448	0.172097	ENSG00000125675	-2.826102155	down	1.82E-19	8.92E-18	GRIA3
ENSG00000125691.14_8	6133	3858	4669	16582	14257	10759	61.90234	33.077305	41.550049	256.576172	150.829239	209.133804	ENSG00000125691	1.247214194	up	3.29E-09	5.50E-08	RPL23
ENSG00000125726.11_6	17615	7503	12496	5548	7003	4532	194.581314	178.89447	184.592087	74.350471	93.188164	63.251099	ENSG00000125726	-1.362159963	down	3.20E-12	7.99E-11	CD70
ENSG00000125730.17_7	493	397	692	91	66	91	1.011371	1.765618	1.873317	0.239734	0.153492	0.318925	ENSG00000125730	-2.948688235	down	7.81E-23	5.14E-21	C3
ENSG00000125740.14_5	1695	577	887	25	25	67	6.316065	5.047162	4.547192	0.110453	0.116262	0.341195	ENSG00000125740	-4.987221575	down	1.75E-48	3.53E-46	FOSB
ENSG00000125821.13_6	2431	749	1627	6116	5378	7329	6.31691	4.334305	5.719971	18.900875	16.522978	23.596785	ENSG00000125821	1.780680765	up	5.43E-16	2.00E-14	DTD1
ENSG00000125826.21_4	4681	1998	3673	64507	51446	59305	37.213543	34.320057	36.685635	662.431519	525.485657	583.397583	ENSG00000125826	3.870854368	up	2.94E-98	2.31E-95	RBCK1
ENSG00000125848.10_5	428	204	375	122	208	150	3.267016	2.651471	4.143543	1.520172	1.79128	1.531577	ENSG00000125848	-1.321126194	down	5.88E-06	5.74E-05	FLRT3
ENSG00000125851.10_4	3	14	15	0	0	0	0.006034	0.064558	0.040759	0	0	0	ENSG00000125851	-6.292619442	down	0.002010008	0.010318885	PCSK2
ENSG00000125863.20_6	4119	1801	3414	10162	11538	8809	6.181209	5.824379	6.839372	19.54351	22.097023	17.382851	ENSG00000125863	1.488099775	up	1.23E-16	4.78E-15	MKKS
ENSG00000125864.14_6	82	87	120	41	44	59	0.373071	0.851465	0.76369	0.224914	0.238564	0.333371	ENSG00000125864	-1.335890411	down	0.005126461	0.022810576	BFSP1
ENSG00000125875.14_5	521	331	355	926	1209	1200	1.061539	1.384359	0.92677	2.425445	2.941728	3.151744	ENSG00000125875	1.169727435	up	5.12E-08	7.22E-07	TBC1D20
ENSG00000125898.13_7	146	74	152	46	63	85	0.868192	0.896076	1.116123	0.298123	0.417778	0.655544	ENSG00000125898	-1.199655163	down	0.004383696	0.020007182	FAM110A
ENSG00000125901.6_4	235	111	239	535	529	965	2.319722	2.352099	3.154887	6.424063	6.308547	12.061461	ENSG00000125901	1.545259239	up	4.91E-08	6.95E-07	MRPS26
ENSG00000125977.7_5	3687	1783	3305	18133	19416	12725	14.50955	15.140266	17.392067	86.587852	92.089081	63.275421	ENSG00000125977	2.295736482	up	7.78E-31	8.16E-29	EIF2S2
ENSG00000126012.12_6	189	132	112	69	70	88	0.377997	0.605358	0.523787	0.137352	0.205898	0.327608	ENSG00000126012	-1.24275929	down	0.002149644	0.01090375	KDM5C
ENSG00000126016.15_5	145	126	153	31	29	26	0.214658	0.373872	0.27875	0.051208	0.047793	0.044505	ENSG00000126016	-2.605818321	down	5.00E-09	8.13E-08	AMOT
ENSG00000126091.21_9	702	276	572	163	253	429	2.99002	2.386154	3.307963	0.790354	1.227621	2.494611	ENSG00000126091	-1.12581817	down	0.000258289	0.001723264	ST3GAL3
ENSG00000126226.22_7	1443	719	1381	3596	4098	3695	9.056911	9.601173	11.155164	29.970406	33.925728	28.756212	ENSG00000126226	1.445830977	up	4.31E-18	1.89E-16	PCID2
ENSG00000126249.8_6	250	54	113	316	421	291	2.241211	1.162213	1.658938	3.375488	4.507904	3.210799	ENSG00000126249	1.136608074	up	0.002625171	0.012950296	PDCD2L
ENSG00000126259.19_5	21	32	20	4	0	0	0.069308	0.234021	0.087059	0.013995	0	0	ENSG00000126259	-4.502494946	down	0.000775578	0.004539429	KIRREL2
ENSG00000126453.9_4	168	63	100	481	400	442	1.772529	1.501228	0.923584	6.684098	6.174592	5.916898	ENSG00000126453	1.789725829	up	8.51E-09	1.34E-07	BCL2L12
ENSG00000126500.3_5	28	24	70	126	173	247	0.070102	0.127936	0.238043	0.387533	0.529926	0.794231	ENSG00000126500	1.878842967	up	8.32E-05	0.000626	FLRT1
ENSG00000126524.10_5	3602	1597	2537	5740	7218	6623	23.003115	21.618586	21.324219	43.836594	56.397411	52.644623	ENSG00000126524	1.099924588	up	1.97E-11	4.49E-10	SBDS
ENSG00000126705.15_7	104	44	94	31	7	23	0.486832	0.197332	0.195808	0.057508	0.055023	0.151381	ENSG00000126705	-2.167175178	down	0.000781387	0.004572295	AHDC1
ENSG00000126709.15_5	268114	126292	158329	1708	1144	1823	3317.535156	3373.206299	2619.436279	25.570124	17.018412	28.397558	ENSG00000126709	-7.120863779	down	2.03E-243	4.79E-239	IFI6
ENSG00000126749.16_7	9113	4147	7247	21162	28122	22690	31.066895	43.404263	36.12664	111.64254	158.196045	137.621613	ENSG00000126749	1.573126832	up	4.26E-23	2.90E-21	EMG1
ENSG00000126785.13_4	833	430	573	130	144	216	2.913403	4.291462	3.302927	0.704968	0.689822	0.903768	ENSG00000126785	-2.176488368	down	6.99E-17	2.76E-15	RHOJ
ENSG00000126804.13_6	518	368	588	124	247	259	1.730525	2.589314	2.555042	0.366183	1.001776	1.113261	ENSG00000126804	-1.537655042	down	4.16E-08	5.94E-07	ZBTB1
ENSG00000126860.11_5	173	80	150	244	642	330	0.944633	0.936191	1.103478	1.600188	4.19279	2.256293	ENSG00000126860	1.329122385	up	0.000140129	0.001003258	EVI2A
ENSG00000126953.8_7	1008	665	976	3364	3490	2423	7.180377	10.120737	9.588057	29.939781	32.433937	22.987114	ENSG00000126953	1.545729204	up	9.09E-14	2.74E-12	TIMM8A
ENSG00000127083.7_3	0	8	24	0	0	0	0	0.070815	0.129559	0	0	0	ENSG00000127083	-6.180093782	down	0.007717646	0.032129635	OMD
ENSG00000127124.16_7	826	349	662	126	81	105	1.314999	1.11721	1.516021	0.205477	0.179713	0.269101	ENSG00000127124	-2.762228451	down	1.82E-21	1.06E-19	HIVEP3
ENSG00000127129.10_5	21	26	7	0	0	0	0.163268	0.445955	0.070141	0	0	0	ENSG00000127129	-7.043908005	down	5.98E-05	0.000464855	EDN2
ENSG00000127152.18_5	102	78	85	34	26	22	0.119534	0.198233	0.133953	0.048662	0.035805	0.032154	ENSG00000127152	-1.975480023	down	0.000184171	0.001280143	BCL11B
ENSG00000127324.9_5	117	33	69	7	14	8	1.019593	0.596069	0.629044	0.053459	0.107691	0.065621	ENSG00000127324	-3.117626967	down	3.40E-06	3.48E-05	TSPAN8
ENSG00000127334.11_8	643	565	941	298	318	372	0.727467	1.424126	1.42331	0.40815	0.432537	0.817845	ENSG00000127334	-1.420929518	down	7.73E-09	1.23E-07	DYRK2
ENSG00000127445.14_4	1800	976	1695	4313	5384	7548	17.886724	20.74493	22.531281	49.094334	71.459694	100.621803	ENSG00000127445	1.676870637	up	1.27E-20	6.94E-19	PIN1
ENSG00000127472.11_4	12	20	0	0	0	0	0.061408	0.219181	0	0	0	0	ENSG00000127472	-6.382085059	down	0.004236729	0.019456807	PLA2G5
ENSG00000127589.4_2	1441	1162	862	790	700	490	9.461279	18.895628	8.679405	7.220289	6.354221	4.656201	ENSG00000127589	-1.116990866	down	9.84E-05	0.000729062	NA
ENSG00000127720.8_5	115	27	72	27	17	8	1.109155	0.282387	0.476588	0.211754	0.094234	0.150723	ENSG00000127720	-2.158787429	down	0.001801078	0.009378879	METTL25
ENSG00000127743.6_5	53	4	8	0	0	0	0.740072	0.113044	0.138048	0	0	0	ENSG00000127743	-6.957568255	down	0.000148653	0.001055645	IL17B
ENSG00000127824.14_6	21419	9602	12992	7064	6100	8271	107.451408	104.258957	88.114922	43.297844	36.838963	52.409931	ENSG00000127824	-1.274668629	down	1.45E-11	3.37E-10	TUBA4A
ENSG00000127837.9_4	1759	653	1223	3415	3728	3580	9.644371	7.589935	9.006471	22.481985	24.21661	24.576134	ENSG00000127837	1.349608222	up	1.97E-12	5.02E-11	AAMP
ENSG00000127863.15_5	655	353	757	45	94	112	1.875416	2.530998	2.936318	0.127734	0.26482	0.445129	ENSG00000127863	-3.089062464	down	2.61E-24	1.88E-22	TNFRSF19
ENSG00000127884.5_5	9951	4406	7246	17950	16938	16869	78.395851	74.905251	76.325859	171.560074	160.798691	167.897491	ENSG00000127884	1.037272093	up	1.39E-09	2.47E-08	ECHS1
ENSG00000127928.13_5	17	6	12	0	0	0	0.084714	0.056921	0.079942	0	0	0	ENSG00000127928	-6.194420231	down	0.002125755	0.010809662	GNGT1
ENSG00000127952.17_6	2316	1166	2023	6115	6423	6487	20.391586	22.216724	22.847004	63.767975	65.607628	72.924545	ENSG00000127952	1.546983044	up	7.96E-24	5.66E-22	STYXL1
ENSG00000128228.5_4	952	427	993	2267	2169	3585	11.6012	11.236039	16.185333	33.528461	31.868589	55.224945	ENSG00000128228	1.523502584	up	4.56E-12	1.12E-10	SDF2L1
ENSG00000128272.14_4	2295	1308	2151	6238	6833	8013	15.678611	19.528692	19.471172	41.495556	57.218678	53.679882	ENSG00000128272	1.609635636	up	1.12E-27	1.00E-25	ATF4
ENSG00000128274.17_6	674	357	592	138	113	128	3.600252	4.754767	4.996225	1.160622	0.847304	0.957286	ENSG00000128274	-2.33859667	down	3.87E-19	1.85E-17	A4GALT
ENSG00000128284.19_7	275	203	292	122	125	217	1.25061	2.214597	1.771591	0.407837	0.414674	0.839274	ENSG00000128284	-1.035122566	down	0.001388865	0.007505533	APOL3
ENSG00000128342.5_5	323	353	422	86	220	70	0.839193	1.975708	1.46458	0.27049	0.686035	0.228054	ENSG00000128342	-1.902857093	down	2.03E-06	2.16E-05	LIF
ENSG00000128394.17_4	892	440	713	455	388	312	3.837891	2.608068	4.617246	4.482534	4.574518	3.21209	ENSG00000128394	-1.047216757	down	3.59E-05	0.000293303	APOBEC3F
ENSG00000128422.17_9	1384	535	953	58	139	40	12.891602	10.913601	12.268212	0.374835	1.141187	0.337553	ENSG00000128422	-3.82962269	down	3.09E-28	2.86E-26	KRT17
ENSG00000128524.5_4	34241	13240	22249	89249	72886	76133	507.903046	423.9953	441.357697	1606.47168	1303.02356	1426.951904	ENSG00000128524	1.572120037	up	1.62E-15	5.72E-14	ATP6V1F
ENSG00000128534.8_5	1029	663	1009	2345	2520	1735	3.09025	2.590353	6.683633	8.132243	8.43351	4.862168	ENSG00000128534	1.028417985	up	8.17E-07	9.47E-06	LSM8
ENSG00000128567.17_5	582	355	489	1259	1326	2026	0.974451	1.238043	1.077337	2.570699	2.602472	4.442257	ENSG00000128567	1.407813082	up	2.64E-11	5.93E-10	PODXL
ENSG00000128578.10_5	45	55	32	93	270	205	0.089994	0.232706	0.081547	0.420219	0.65642	0.52509	ENSG00000128578	1.682015063	up	0.000703349	0.004169404	STRIP2
ENSG00000128590.5_4	415	223	431	1723	1563	2580	1.737307	2.018583	2.41488	8.741329	7.872371	13.639841	ENSG00000128590	2.201708125	up	2.18E-23	1.51E-21	DNAJB9
ENSG00000128595.17_7	92580	72450	90414	36031	41208	49112	304.745758	479.673615	365.041016	129.411499	152.303101	169.324158	ENSG00000128595	-1.328741317	down	1.42E-16	5.46E-15	CALU
ENSG00000128596.17_7	141	76	89	274	266	380	0.332413	0.45848	0.516269	0.958678	0.798062	1.35496	ENSG00000128596	1.317275891	up	5.09E-05	0.000400856	CCDC136
ENSG00000128606.13_5	271	214	323	78	235	126	1.35822	2.189457	2.219151	0.447934	1.421769	0.876715	ENSG00000128606	-1.206919627	down	0.001170572	0.006469525	LRRC17
ENSG00000128609.15_5	4845	5278	5989	2989	3252	3142	33.843212	53.875546	56.86845	22.943657	25.343674	24.09491	ENSG00000128609	-1.121507152	down	9.74E-08	1.31E-06	NDUFA5
ENSG00000128656.15_6	892	517	917	247	310	413	4.408566	5.247419	5.819674	1.446306	2.139982	2.478887	ENSG00000128656	-1.535275805	down	8.77E-12	2.09E-10	CHN1
ENSG00000128692.8_4	222	101	324	1087	1253	853	2.266602	2.214683	4.426796	13.473841	15.435469	11.009028	ENSG00000128692	2.095894587	up	2.22E-13	6.43E-12	NA
ENSG00000128699.14_8	4050	1986	3143	13143	16634	13861	20.277939	22.065866	20.8834	78.236717	100.122704	84.072212	ENSG00000128699	2.001539409	up	2.33E-38	3.19E-36	ORMDL1
ENSG00000128713.14_5	390	173	365	899	837	728	3.111823	2.979158	3.893881	8.709502	8.059555	7.348189	ENSG00000128713	1.19565473	up	1.04E-06	1.18E-05	HOXD11
ENSG00000128739.22_8	19990	7581	13000	43277	39427	40978	149.736633	125.160553	123.745819	366.532654	334.562897	369.212982	ENSG00000128739	1.403013026	up	7.50E-14	2.28E-12	SNRPN
ENSG00000128944.13_7	2192	955	1741	4104	5271	4246	14.415915	12.64189	15.076885	31.268242	42.069244	35.713207	ENSG00000128944	1.247251956	up	9.37E-13	2.47E-11	KNSTRN
ENSG00000128965.13_6	526	81	375	7011	6483	6108	3.497793	1.154287	3.360838	56.329174	51.744617	51.100521	ENSG00000128965	4.20349781	up	7.09E-15	2.39E-13	CHAC1
ENSG00000129003.19_9	837	503	734	264	451	438	0.700467	0.805861	0.807455	0.274686	0.420745	0.475046	ENSG00000129003	-1.138401585	down	4.90E-07	5.91E-06	VPS13C
ENSG00000129009.13_5	550	254	525	25	12	39	2.391155	2.360783	3.027058	0.129996	0.057903	0.208082	ENSG00000129009	-4.359801103	down	5.58E-31	5.88E-29	ISLR
ENSG00000129116.19_8	3024	1722	3001	689	1676	1538	10.153296	11.667219	13.122184	2.726135	3.875659	6.253195	ENSG00000129116	-1.282977779	down	3.18E-08	4.62E-07	PALLD
ENSG00000129151.9_6	579	420	569	50	63	80	3.411397	5.810863	4.684996	0.381562	0.370946	0.58167	ENSG00000129151	-3.326689449	down	4.18E-33	4.68E-31	BBOX1
ENSG00000129170.10_8	0	0	0	23	22	8	0	0	0	0.192401	0.180393	0.066883	ENSG00000129170	6.320340594	up	0.000702043	0.004164294	CSRP3
ENSG00000129197.14_3	2805	1501	3027	10209	10062	8325	20.132336	23.147301	29.027569	87.641197	85.187325	73.601791	ENSG00000129197	1.732898601	up	3.90E-21	2.23E-19	RPAIN
ENSG00000129214.15_6	0	0	0	12	19	10	0	0	0	0.113545	0.201298	0.089766	ENSG00000129214	5.91115227	up	0.003207788	0.015337215	SHBG
ENSG00000129226.14_5	93	205	231	2	7	0	0.553871	2.66495	1.818737	0.00038	0.040658	0	ENSG00000129226	-6.283525038	down	1.18E-17	4.94E-16	CD68
ENSG00000129244.9_5	119	50	62	15	30	8	0.35683	0.321501	0.248831	0.051438	0.106276	0.030385	ENSG00000129244	-2.36460485	down	0.00023865	0.001607686	ATP1B2
ENSG00000129317.14_6	666	409	646	203	235	315	1.114053	1.25518	1.614676	0.535478	0.757319	0.446578	ENSG00000129317	-1.472549485	down	4.78E-10	9.06E-09	PUS7L
ENSG00000129451.12_5	22	33	46	133	102	175	0.069726	0.229513	0.269175	0.52013	0.39421	0.720064	ENSG00000129451	1.683616117	up	0.000976986	0.005538368	KLK10
ENSG00000129455.15_5	50	21	55	3	19	3	0.552211	0.465362	0.775659	0.059633	0.341479	0.071717	ENSG00000129455	-2.588070749	down	0.003978935	0.018416227	KLK8
ENSG00000129460.16_7	3489	1309	2038	6894	6973	5755	31.983585	25.867605	24.862679	76.557976	76.609131	66.512527	ENSG00000129460	1.315396443	up	2.71E-10	5.33E-09	NGDN
ENSG00000129474.16_7	253	227	235	1171	1958	1493	0.89029	1.602006	1.700023	5.006324	8.01247	5.758808	ENSG00000129474	2.354199561	up	6.92E-23	4.60E-21	AJUBA
ENSG00000129521.15_6	661	352	574	220	189	287	2.549478	2.88228	2.888594	1.089129	1.008203	2.037019	ENSG00000129521	-1.44263775	down	1.15E-08	1.79E-07	EGLN3
ENSG00000129534.14_6	1009	668	907	170	461	438	2.497774	4.869938	3.296951	0.739076	1.510393	1.422008	ENSG00000129534	-1.597747768	down	1.33E-08	2.05E-07	MIS18BP1
ENSG00000129538.14_5	2041	833	1762	29	58	87	23.27739	19.812117	26.097584	0.383519	0.765949	1.216309	ENSG00000129538	-4.986183764	down	1.43E-71	5.20E-69	RNASE1
ENSG00000129625.13_6	5849	2637	4238	11308	10837	9793	25.897314	23.025658	23.357964	63.0387	66.329659	55.633575	ENSG00000129625	1.104088629	up	4.98E-10	9.41E-09	REEP5
ENSG00000129646.14_8	46	22	79	266	263	232	0.080295	0.083996	0.184953	0.569833	0.633891	0.66213	ENSG00000129646	2.161301067	up	1.32E-07	1.74E-06	QRICH2
ENSG00000129682.16_8	119	68	45	327	269	389	0.395859	0.318861	0.160044	1.400641	0.871404	1.213997	ENSG00000129682	1.801889599	up	2.65E-06	2.76E-05	FGF13
ENSG00000129757.13_6	36	18	42	776	563	783	0.238314	0.258321	0.521678	7.602241	5.667293	7.971724	ENSG00000129757	4.235298241	up	2.71E-40	4.03E-38	CDKN1C
ENSG00000129824.16_5	1628	632	1207	3622	3296	2743	14.176233	11.533772	13.72611	37.385342	34.807083	29.604576	ENSG00000129824	1.280235137	up	2.59E-09	4.40E-08	RPS4Y1
ENSG00000130005.13_5	1184	540	1024	2710	3620	4242	10.569849	10.0554	12.327785	29.409119	39.767822	48.327988	ENSG00000130005	1.694571033	up	2.34E-21	1.36E-19	GAMT
ENSG00000130150.12_6	420	284	323	198	194	209	1.331695	1.796882	1.627044	0.77843	0.629541	0.688774	ENSG00000130150	-1.061062124	down	0.000112528	0.000825168	MOSPD2
ENSG00000130254.12_6	687	302	519	260	273	333	2.574236	2.439091	3.092087	1.143944	1.221638	1.894155	ENSG00000130254	-1.036920348	down	1.94E-05	0.000168598	SAFB2
ENSG00000130294.16_7	12	8	11	163	225	152	0.012646	0.022562	0.015527	0.214591	0.294596	0.209482	ENSG00000130294	3.848187747	up	1.89E-14	6.10E-13	KIF1A
ENSG00000130303.13_6	1075684	395839	610724	19620	14372	17452	10856.59863	8621.744141	8208.506836	240.224014	174.321609	222.131073	ENSG00000130303	-5.535030564	down	1.37E-146	4.04E-143	BST2
ENSG00000130309.11_8	15391	5795	10860	32242	30759	31476	42.462658	42.624531	40.217049	110.713638	102.246101	109.705025	ENSG00000130309	1.355331465	up	9.87E-14	2.96E-12	COLGALT1
ENSG00000130332.15_7	7597	3779	5372	20368	16487	10148	153.453278	165.152527	145.959793	494.950165	397.17514	256.007019	ENSG00000130332	1.273949234	up	1.88E-07	2.42E-06	LSM7
ENSG00000130377.13_4	0	18	25	0	0	0	0	0.134993	0.12128	0	0	0	ENSG00000130377	-6.719381096	down	0.001326963	0.007220599	ACSBG2
ENSG00000130475.14_5	27	0	22	0	0	0	0.081933	0	0.090406	0	0	0	ENSG00000130475	-6.534563091	down	0.002166907	0.010979608	FCHO1
ENSG00000130487.9_4	12	10	12	189	118	158	0.040379	0.070493	0.053808	0.767926	0.476983	0.667587	ENSG00000130487	3.505169403	up	4.40E-11	9.61E-10	KLHDC7B
ENSG00000130513.6_5	6441	2874	4135	73175	122095	81301	54.475018	52.308079	46.550549	744.75238	1234.743652	862.02832	ENSG00000130513	4.111729428	up	7.86E-102	7.42E-99	GDF15
ENSG00000130518.17_7	106	23	97	9	21	5	0.432018	0.105707	0.311359	0.018072	0.047902	0.009211	ENSG00000130518	-2.857238235	down	7.90E-05	0.000597325	IQCN
ENSG00000130520.11_8	424	267	520	1955	2654	9097	2.607404	3.503876	4.107284	14.167303	19.171242	68.524902	ENSG00000130520	3.18661671	up	4.90E-07	5.90E-06	LSM4
ENSG00000130522.6_6	209	314	252	129	161	150	1.088271	3.525321	1.751678	0.813025	1.008658	0.986543	ENSG00000130522	-1.217645086	down	0.001039505	0.005828099	JUND
ENSG00000130529.16_6	289	189	395	1090	882	861	1.401118	1.89209	2.441355	6.834935	5.636667	5.67646	ENSG00000130529	1.458937992	up	1.43E-08	2.18E-07	TRPM4
ENSG00000130544.12_4	2672	1739	2431	7758	7293	5290	4.667979	6.554437	5.677988	16.476774	15.366432	11.681952	ENSG00000130544	1.313148289	up	8.68E-11	1.82E-09	ZNF557
ENSG00000130589.16_4	378	221	295	134	123	183	0.698239	0.969174	0.813597	0.410908	0.328357	0.566838	ENSG00000130589	-1.296444377	down	1.34E-05	0.000120545	HELZ2
ENSG00000130592.16_3	168	79	150	61	88	52	0.653745	0.84238	0.991857	0.757664	0.596004	0.248115	ENSG00000130592	-1.21903507	down	0.003500779	0.016454775	LSP1
ENSG00000130706.13_6	20106	8550	14451	35939	36821	29398	143.829758	134.387009	138.692596	316.925171	310.411835	260.708954	ENSG00000130706	1.028926578	up	1.89E-08	2.83E-07	ADRM1
ENSG00000130707.18_4	300	148	372	1248	918	1124	2.132694	1.954988	3.38362	9.953023	6.699142	9.367149	ENSG00000130707	1.791867766	up	4.35E-12	1.07E-10	ASS1
ENSG00000130713.16_7	1652	729	1394	2854	4658	4013	8.334727	7.973177	9.400071	17.447187	28.354149	25.193033	ENSG00000130713	1.363625596	up	1.12E-13	3.32E-12	EXOSC2
ENSG00000130720.13_6	539	306	617	1716	1353	2418	3.782021	3.267176	4.925263	23.424187	19.849049	38.999664	ENSG00000130720	1.656489049	up	1.22E-12	3.17E-11	FIBCD1
ENSG00000130764.10_5	641	403	644	1211	1465	1665	1.518428	2.032725	2.034565	3.432306	4.139709	4.915744	ENSG00000130764	1.083995844	up	3.02E-09	5.09E-08	LRRC47
ENSG00000130766.5_4	453	170	284	2248	3953	2946	1.315436	1.061338	1.101528	7.922716	13.841079	10.815308	ENSG00000130766	3.096493368	up	9.31E-44	1.56E-41	SESN2
ENSG00000130768.15_5	220	123	119	38	47	75	1.193344	1.476042	0.868372	0.244577	0.302497	0.501554	ENSG00000130768	-1.827438857	down	2.16E-05	0.000185325	SMPDL3B
ENSG00000130775.16_4	461	263	417	79	100	117	3.700054	2.957808	3.651934	0.339	0.903025	0.85417	ENSG00000130775	-2.219125541	down	1.59E-15	5.65E-14	THEMIS2
ENSG00000130813.18_8	3086	1234	2138	513	352	551	17.47781	14.076752	15.276746	3.384782	2.300581	3.784678	ENSG00000130813	-2.398901958	down	5.72E-25	4.23E-23	SHFL
ENSG00000130816.16_7	13323	5909	9142	4489	5629	4843	42.159084	24.844791	60.058094	11.000688	13.662382	25.423786	ENSG00000130816	-1.161471117	down	2.34E-12	5.92E-11	DNMT1
ENSG00000130822.16_5	45	7	33	4	0	0	0.268069	0.078663	0.343249	0.017998	0	0	ENSG00000130822	-4.4371909	down	0.001213536	0.006677275	PNCK
ENSG00000130826.18_5	4047	2483	3683	7544	11068	8373	16.023432	22.245068	20.680704	37.231361	54.824753	41.803825	ENSG00000130826	1.123029877	up	3.04E-12	7.62E-11	DKC1
ENSG00000130921.8_5	2614	1589	2902	6357	6016	5029	16.737431	22.683088	23.92724	49.603069	46.11544	40.593269	ENSG00000130921	1.0482567	up	2.24E-08	3.32E-07	C12orf65
ENSG00000130948.10_6	213	132	198	0	0	11	1.847465	2.49863	2.270641	0	0	0.112995	ENSG00000130948	-5.986260609	down	0.000399943	0.002548773	HSD17B3
ENSG00000131023.13_5	305	169	324	84	186	192	0.83084	0.496873	0.906536	0.137938	0.306249	0.331055	ENSG00000131023	-1.073164903	down	0.001342026	0.007289122	LATS1
ENSG00000131051.24_10	6045	3415	5592	13483	16922	14459	29.005482	34.808296	39.5508	116.09539	126.448158	117.898918	ENSG00000131051	1.315014509	up	5.92E-20	3.08E-18	RBM39
ENSG00000131080.15_6	55	7	16	70	152	128	0.15777	0.038781	0.060892	0.243415	0.528934	0.466401	ENSG00000131080	2.000963566	up	0.001238712	0.006795214	EDA2R
ENSG00000131095.13_7	354	252	300	61	181	125	1.344406	1.773762	1.858061	0.196194	0.807236	0.930974	ENSG00000131095	-1.636673947	down	4.49E-06	4.49E-05	GFAP
ENSG00000131171.13_5	1766	1120	1461	573	663	719	10.119544	13.778986	11.158196	3.962311	4.553048	5.17458	ENSG00000131171	-1.438181463	down	1.22E-15	4.36E-14	SH3BGRL
ENSG00000131203.13_7	220	62	243	31	29	73	1.414986	0.714314	2.015576	0.190851	0.188834	0.491898	ENSG00000131203	-2.179735464	down	1.02E-05	9.38E-05	IDO1
ENSG00000131368.8_5	1889	821	1506	2774	3766	3429	6.185151	4.205516	5.598055	9.830892	26.204947	15.599495	ENSG00000131368	1.003548199	up	5.27E-09	8.54E-08	MRPS25
ENSG00000131370.16_7	554	368	624	207	258	324	1.712503	2.43657	2.588266	0.767702	0.953893	1.254803	ENSG00000131370	-1.255899821	down	2.64E-07	3.32E-06	SH3BP5
ENSG00000131378.14_9	430	380	369	863	1148	1062	1.805328	3.068712	2.079719	3.622048	4.863457	4.923857	ENSG00000131378	1.046099576	up	8.32E-06	7.83E-05	RFTN1
ENSG00000131386.19_6	49	51	41	11	18	16	0.096426	0.315304	0.105196	0.024586	0.040978	0.038373	ENSG00000131386	-2.019052635	down	0.003373765	0.015972269	GALNT15
ENSG00000131389.17_6	271	251	236	33	68	28	0.460115	0.831245	0.509004	0.153546	0.248158	0.052585	ENSG00000131389	-2.902779549	down	2.18E-12	5.54E-11	SLC6A6
ENSG00000131462.8_4	10639	4262	6582	18891	20197	16529	67.213959	57.566917	55.071796	144.023071	153.133392	131.912796	ENSG00000131462	1.15646296	up	1.19E-09	2.12E-08	TUBG1
ENSG00000131467.11_6	2499	1556	2789	6035	7228	7421	8.042666	10.809695	12.012607	24.559797	28.771778	30.311911	ENSG00000131467	1.326943688	up	2.90E-18	1.29E-16	PSME3
ENSG00000131469.15_5	6108	3298	4709	19190	17219	12743	119.705193	140.868317	122.168564	446.240387	403.23877	310.488373	ENSG00000131469	1.56408788	up	9.72E-15	3.25E-13	RPL27
ENSG00000131470.14_4	402	181	347	1565	1848	1182	2.956609	3.075989	3.597478	15.151358	16.711561	11.328516	ENSG00000131470	2.081724215	up	8.13E-19	3.79E-17	PSMC3IP
ENSG00000131669.10_5	2194	1207	2448	3986	4970	7403	17.760372	20.995037	26.473249	39.136517	48.56842	75.870377	ENSG00000131669	1.216649768	up	7.45E-10	1.38E-08	NINJ1
ENSG00000131711.15_4	52897	31816	51734	273004	324380	259001	53.111275	84.084061	66.880638	285.269348	339.544281	282.508911	ENSG00000131711	2.388370814	up	3.19E-56	8.27E-54	MAP1B
ENSG00000131759.18_8	162	55	101	31	59	26	0.495998	0.364137	0.414124	0.111806	0.216923	0.09858	ENSG00000131759	-1.670182938	down	0.001249644	0.006842837	RARA
ENSG00000131788.16_5	1033	728	881	431	439	616	4.286331	6.596014	5.420813	1.894185	1.9467	3.093225	ENSG00000131788	-1.131753415	down	2.29E-07	2.92E-06	PIAS3
ENSG00000131791.8_5	360	248	422	835	1077	945	0.750369	1.038165	1.351754	1.916401	2.53291	2.266062	ENSG00000131791	1.193057126	up	2.19E-08	3.24E-07	PRKAB2
ENSG00000131845.14_6	127	105	231	113	81	60	0.320909	0.540176	0.743606	0.326022	0.286873	0.223252	ENSG00000131845	-1.104859577	down	0.012727442	0.048339705	ZNF304
ENSG00000131848.9_8	157	113	139	75	71	93	1.480435	1.287239	1.593694	0.934442	0.791375	0.9251	ENSG00000131848	-1.070140866	down	0.005564773	0.02439303	ZSCAN5A
ENSG00000131871.15_7	1293	675	926	2853	2771	2909	10.412856	11.881248	10.215461	27.921844	26.289841	29.409061	ENSG00000131871	1.308876146	up	2.38E-13	6.85E-12	SELENOS
ENSG00000131899.11_5	314	87	181	130	85	25	0.748745	0.444879	0.572208	0.370446	0.243487	0.051014	ENSG00000131899	-1.398198404	down	0.008822879	0.035839625	LLGL1
ENSG00000132004.13_5	2744	1632	2393	1145	1086	1180	15.997698	20.520588	18.6731	8.114109	7.619763	8.679862	ENSG00000132004	-1.250725772	down	2.33E-13	6.72E-12	FBXW9
ENSG00000132010.16_6	151	115	215	370	350	469	0.504864	0.985459	1.323845	2.370397	2.128201	2.486236	ENSG00000132010	1.027613639	up	0.000497316	0.003080332	ZNF20
ENSG00000132016.11_5	168	77	82	33	33	32	0.863768	0.669546	0.587484	0.546017	0.160669	0.18555	ENSG00000132016	-1.984183057	down	5.09E-05	0.000400856	C19orf57
ENSG00000132109.10_5	2045	993	1341	446	654	645	10.630825	11.130393	9.317979	2.81006	4.096972	4.235972	ENSG00000132109	-1.592653366	down	1.98E-15	6.96E-14	TRIM21
ENSG00000132122.12_8	207	158	137	51	77	104	0.448649	0.679788	0.837255	0.123055	0.185746	0.271447	ENSG00000132122	-1.456466723	down	0.000295134	0.00193895	SPATA6
ENSG00000132170.22_8	0	0	0	16	9	10	0	0	0	0.091195	0.049075	0.061309	ENSG00000132170	5.724808132	up	0.006301998	0.027177493	PPARG
ENSG00000132185.17_5	8	0	0	55	66	93	0.030543	0	0	0.268125	0.329963	0.488408	ENSG00000132185	4.597094656	up	2.76E-06	2.87E-05	FCRLA
ENSG00000132274.16_5	1469	767	1160	132	174	154	5.796087	6.677192	5.868014	0.851179	0.804554	0.999418	ENSG00000132274	-3.144051063	down	1.55E-51	3.35E-49	TRIM22
ENSG00000132294.15_8	978	494	1005	358	519	488	1.809559	1.974338	2.63328	0.802542	1.157463	1.139976	ENSG00000132294	-1.112107161	down	1.59E-07	2.07E-06	EFR3A
ENSG00000132313.15_6	765	269	512	1360	1436	1387	3.312521	1.729052	2.193753	10.697847	8.996985	9.281718	ENSG00000132313	1.230732554	up	3.15E-08	4.58E-07	MRPL35
ENSG00000132326.12_6	293	125	148	560	963	468	0.554002	0.424076	0.375445	1.070334	1.827591	0.931319	ENSG00000132326	1.568407498	up	8.23E-07	9.53E-06	PER2
ENSG00000132341.12_4	78935	30296	44131	202689	209228	172873	328.684082	308.833344	243.906784	1057.900391	1075.475586	907.296692	ENSG00000132341	1.720411806	up	7.80E-18	3.32E-16	RAN
ENSG00000132357.14_5	174	76	114	62	23	66	0.686734	0.407829	0.378577	0.187082	0.111175	0.313345	ENSG00000132357	-1.48369752	down	0.003427608	0.016172036	CARD6
ENSG00000132359.15_7	112	66	160	455	411	431	0.241195	0.304628	0.461418	1.000754	1.069422	0.952992	ENSG00000132359	1.704108709	up	3.15E-08	4.59E-07	RAP1GAP2
ENSG00000132485.14_7	3688	2563	3778	1183	1600	1699	16.780968	21.101023	21.920856	6.358677	8.498045	9.676045	ENSG00000132485	-1.458803018	down	5.14E-19	2.44E-17	ZRANB2
ENSG00000132498.7	237	76	198	44	48	52	0.698703	0.510957	0.73832	0.134241	0.177641	0.222944	ENSG00000132498	-2.024086561	down	1.13E-06	1.28E-05	NA
ENSG00000132530.17_6	4227	2476	3718	360	312	158	14.980827	17.728905	16.243362	1.495002	1.43405	1.20802	ENSG00000132530	-3.882246724	down	2.87E-48	5.65E-46	XAF1
ENSG00000132535.21_7	117	77	116	44	17	41	0.192938	0.337644	0.316601	0.086479	0.032585	0.105466	ENSG00000132535	-1.854009212	down	0.000428327	0.002701937	DLG4
ENSG00000132563.16_5	284	164	185	90	127	126	1.376221	1.888054	1.159787	0.512657	0.766347	0.747164	ENSG00000132563	-1.172075662	down	0.000424886	0.002686697	REEP2
ENSG00000132604.11_8	522	315	582	1351	1289	1633	2.014181	2.307866	2.630777	5.540255	5.428596	6.96385	ENSG00000132604	1.331704899	up	3.09E-11	6.87E-10	TERF2
ENSG00000132622.11_4	17	8	5	0	0	0	0.054507	0.049348	0.017175	0	0	0	ENSG00000132622	-6.030919722	down	0.004249392	0.019498539	HSPA12B
ENSG00000132640.15_7	726	613	663	364	314	535	1.517936	2.607692	1.824481	0.942371	0.893247	1.351905	ENSG00000132640	-1.047412252	down	6.57E-05	0.000507343	BTBD3
ENSG00000132661.4_5	2036	963	2160	5024	5444	6891	19.284904	19.684372	27.358501	57.734207	62.142151	82.464752	ENSG00000132661	1.514035351	up	2.66E-17	1.08E-15	NXT1
ENSG00000132669.13_5	4084	2115	3751	10467	13231	9605	10.322618	11.231295	12.46007	29.585804	36.287323	27.763998	ENSG00000132669	1.498544319	up	7.34E-19	3.44E-17	RIN2
ENSG00000132677.13_5	6	35	2	0	0	0	0.031032	0.483743	0.00747	0	0	0	ENSG00000132677	-6.939648069	down	0.000314588	0.002054174	RHBG
ENSG00000132692.19_7	75	51	44	24	26	19	0.228741	0.333956	0.179257	0.085175	0.0931	0.07227	ENSG00000132692	-1.59560547	down	0.009571034	0.038279269	BCAN
ENSG00000132716.19_7	2993	1569	2303	1091	1477	1413	13.864622	14.691899	13.542552	5.88677	7.110587	6.704424	ENSG00000132716	-1.051551409	down	1.77E-10	3.57E-09	DCAF8
ENSG00000132823.11_5	4728	2232	4194	15186	19597	14476	22.568949	22.975887	26.744528	87.884949	112.652275	87.239616	ENSG00000132823	1.907816521	up	1.80E-29	1.79E-27	OSER1
ENSG00000132837.15_6	0	1	0	132	106	143	0	0.032413	0	2.559639	1.923974	3.164174	ENSG00000132837	8.176879297	up	3.00E-10	5.85E-09	DMGDH
ENSG00000132881.12_6	0	0	0	41	25	12	0	0	0	0.316485	0.187934	0.093782	ENSG00000132881	6.901311629	up	4.48E-05	0.000356865	CPLANE2
ENSG00000132911.5_4	208	169	227	39	30	4	1.015	1.774126	1.47862	0.226129	0.175774	0.019343	ENSG00000132911	-3.297749522	down	4.48E-09	7.31E-08	NMUR2
ENSG00000132965.9_3	255	122	178	1209	805	1045	2.893153	2.920223	2.639428	16.316477	10.782904	14.694965	ENSG00000132965	2.23765083	up	2.09E-17	8.52E-16	ALOX5AP
ENSG00000133019.11_6	291	134	252	101	66	131	0.759845	0.331139	0.451082	0.23969	0.090352	0.227757	ENSG00000133019	-1.413696443	down	0.000107774	0.000792528	CHRM3
ENSG00000133048.13_5	6553	4326	6017	1234	1211	1472	40.148392	58.417542	49.019588	9.140744	9.051706	11.485937	ENSG00000133048	-2.390138259	down	2.45E-50	5.11E-48	CHI3L1
ENSG00000133067.17_5	24	0	23	0	0	0	0.067506	0	0.085985	0	0	0	ENSG00000133067	-6.480164524	down	0.002608218	0.012880121	LGR6
ENSG00000133103.17_4	327	144	248	112	164	149	0.930457	0.806737	0.918338	0.344976	0.46871	0.525153	ENSG00000133103	-1.004259151	down	0.001206927	0.006647181	COG6
ENSG00000133106.14_5	1759	785	1546	258	376	403	6.48707	6.253193	8.734912	1.325073	1.457247	1.752309	ENSG00000133106	-2.225486256	down	4.13E-27	3.52E-25	EPSTI1
ENSG00000133110.15_6	429	312	526	23	12	42	1.474712	2.188803	2.244039	0.082775	0.042945	0.160748	ENSG00000133110	-4.327553176	down	2.51E-29	2.47E-27	POSTN
ENSG00000133134.11_7	282	145	141	7139	5695	5188	3.144782	3.494257	2.146365	102.28318	80.572983	77.535858	ENSG00000133134	4.745894922	up	1.55E-85	8.29E-83	BEX2
ENSG00000133138.20_7	490	448	549	88	88	186	0.985443	1.977829	1.634847	0.32403	0.238405	0.626805	ENSG00000133138	-2.378997317	down	1.93E-13	5.62E-12	TBC1D8B
ENSG00000133169.6_5	214	102	151	724	659	456	2.700837	2.76268	2.541741	11.105003	10.044122	7.289372	ENSG00000133169	1.754812903	up	2.76E-09	4.67E-08	BEX1
ENSG00000133316.15_7	2795	1274	1758	4070	5485	4274	19.429501	23.245878	19.858412	42.832039	56.988983	44.591774	ENSG00000133316	1.00059386	up	7.38E-08	1.01E-06	WDR74
ENSG00000133318.14_9	12994	6303	8776	27349	27074	34541	51.479294	54.24337	47.003052	132.668137	133.00386	176.872849	ENSG00000133318	1.413387135	up	1.20E-17	5.01E-16	RTN3
ENSG00000133321.11_5	1315	671	973	428	274	343	17.434748	19.319857	17.257406	6.86884	4.36783	5.772325	ENSG00000133321	-1.729389819	down	6.63E-12	1.60E-10	PLAAT4
ENSG00000133519.12_5	223	144	201	73	78	134	1.0421	1.379768	1.133922	0.372211	0.395558	0.798407	ENSG00000133519	-1.289441304	down	0.000376297	0.002414376	NA
ENSG00000133597.11_8	142	43	104	252	298	278	0.552381	0.359712	0.568522	1.285629	1.459258	1.395331	ENSG00000133597	1.319706687	up	0.000141224	0.001009569	ADCK2
ENSG00000133636.11_4	114	73	176	16	14	11	0.919928	1.266729	1.902775	0.149868	0.13354	0.110248	ENSG00000133636	-3.382717594	down	2.48E-10	4.91E-09	NTS
ENSG00000133641.18_4	355	255	410	850	1191	788	1.333917	2.077652	2.062011	4.047276	7.079321	6.017022	ENSG00000133641	1.189589007	up	5.07E-07	6.09E-06	C12orf29
ENSG00000133706.19_5	4225	2105	3707	6653	11868	9563	11.541502	15.725987	11.431743	21.837725	33.61956	31.128561	ENSG00000133706	1.22112592	up	4.09E-12	1.01E-10	LARS1
ENSG00000133740.11_5	18	7	32	77	130	71	0.034881	0.027879	0.126091	0.236098	0.309949	0.324531	ENSG00000133740	2.072210659	up	0.000798736	0.004664562	E2F5
ENSG00000133773.12_6	1531	568	1222	4630	6507	3678	11.425231	9.098046	11.213611	41.983421	56.193295	33.701027	ENSG00000133773	1.950586826	up	1.17E-17	4.91E-16	CCDC59
ENSG00000133884.10_5	3646	2076	2863	1332	1754	1919	10.848608	13.215778	11.701098	5.379025	6.5725	7.906902	ENSG00000133884	-1.057768435	down	7.47E-11	1.58E-09	DPF2
ENSG00000134138.20_7	799	346	706	218	246	347	2.644588	2.691051	3.959164	1.021839	1.100949	1.679407	ENSG00000134138	-1.428865229	down	9.55E-09	1.50E-07	MEIS2
ENSG00000134153.10_8	15618	5365	9932	25981	24058	22296	147.158447	109.133629	124.984428	296.964874	273.092499	265.134949	ENSG00000134153	1.036246435	up	3.62E-07	4.47E-06	EMC7
ENSG00000134215.16_6	205	73	146	12	26	19	0.903811	0.368629	0.432466	0.026816	0.092395	0.046037	ENSG00000134215	-3.125079229	down	2.17E-10	4.32E-09	VAV3
ENSG00000134240.12_4	221	293	367	0	0	0	0.982051	2.648029	2.072688	0	0	0	ENSG00000134240	-10.9911716	down	1.02E-18	4.67E-17	HMGCS2
ENSG00000134259.4_4	55	39	65	1488	2366	1243	0.516234	0.788892	0.815494	17.11668	27.034063	14.881592	ENSG00000134259	4.725656628	up	3.34E-65	1.04E-62	NGF
ENSG00000134283.18_6	3711	2049	3509	1464	2040	1922	23.547653	27.272835	29.426683	10.453326	15.178901	15.284241	ENSG00000134283	-1.037945699	down	2.83E-11	6.32E-10	PPHLN1
ENSG00000134321.12_4	1643	718	811	60	74	73	7.853706	5.955729	4.781065	0.238906	0.262843	0.468986	ENSG00000134321	-4.186949189	down	4.05E-54	9.95E-52	RSAD2
ENSG00000134326.11_6	345	182	312	14	27	10	1.427573	1.381702	1.462889	0.055808	0.109406	0.041076	ENSG00000134326	-4.296119379	down	4.51E-25	3.37E-23	CMPK2
ENSG00000134339.9_7	106	9	49	0	6	24	1.473568	0.258005	1.472285	0	0.106078	0.519608	ENSG00000134339	-2.630091113	down	0.010827402	0.042398943	SAA2
ENSG00000134352.20_6	798	576	854	1506	2075	3144	1.05859	1.840505	1.472914	2.327919	3.749728	4.744545	ENSG00000134352	1.281133878	up	8.05E-09	1.27E-07	IL6ST
ENSG00000134369.15_5	2588	1658	2400	589	685	996	3.054545	3.907173	3.310655	0.604666	0.787573	1.263733	ENSG00000134369	-1.841823415	down	1.10E-21	6.48E-20	NAV1
ENSG00000134440.12_6	989	725	994	3435	5604	4374	3.598349	5.938645	4.906439	15.340171	24.807098	20.242893	ENSG00000134440	2.002170668	up	1.49E-27	1.31E-25	NARS1
ENSG00000134470.21_11	18	28	27	354	258	410	0.194854	0.325031	0.194728	3.104033	2.483556	3.606405	ENSG00000134470	3.463882692	up	9.89E-17	3.87E-15	IL15RA
ENSG00000134531.10_6	2221	1407	1963	751	861	1188	6.349663	8.551988	5.564662	2.559299	2.536325	2.83073	ENSG00000134531	-1.287715409	down	5.33E-12	1.30E-10	EMP1
ENSG00000134532.19_7	238	139	175	60	121	112	1.058556	1.489127	1.331103	0.230238	0.828489	0.727028	ENSG00000134532	-1.213493222	down	0.00089487	0.005144521	SOX5
ENSG00000134533.6_8	117	59	78	24	15	7	0.535536	0.668178	0.454551	0.120132	0.078466	0.036455	ENSG00000134533	-2.673398445	down	1.96E-05	0.000169894	RERG
ENSG00000134548.11_5	31	12	0	94	153	143	0.183646	0.114159	0	0.601145	0.834212	0.806372	ENSG00000134548	2.906303247	up	0.000105873	0.000779032	SPX
ENSG00000134684.10_4	3193	1442	2613	16938	26392	20814	10.68048	11.012486	11.852139	65.132835	101.166267	83.370331	ENSG00000134684	2.900524501	up	6.46E-67	2.06E-64	YARS1
ENSG00000134716.11_6	231	190	221	47	39	100	1.270115	2.182941	1.578264	0.261439	0.199271	0.666081	ENSG00000134716	-2.117655642	down	2.65E-07	3.33E-06	CYP2J2
ENSG00000134717.18_5	1485	1050	1323	6377	7551	6177	6.809781	10.17251	9.465045	38.266117	50.001839	31.71117	ENSG00000134717	2.091500078	up	2.13E-34	2.46E-32	BTF3L4
ENSG00000134780.10_4	131	59	97	49	54	51	0.226795	0.220526	0.223807	0.103105	0.112306	0.11088	ENSG00000134780	-1.13409856	down	0.012731093	0.048345795	DAGLA
ENSG00000134817.10_4	111	77	129	4	0	3	0.393089	0.459195	0.480334	0.012987	0	0.008312	ENSG00000134817	-5.75851237	down	9.30E-14	2.80E-12	APLNR
ENSG00000134827.8_5	603	270	476	176	172	172	4.165797	3.939165	4.395832	1.497646	1.471793	1.490389	ENSG00000134827	-1.602707474	down	1.11E-09	1.99E-08	TCN1
ENSG00000134853.12_7	140	63	119	42	51	66	0.340847	0.248834	0.379793	0.08572	0.127368	0.183946	ENSG00000134853	-1.264040799	down	0.004353056	0.019886568	PDGFRA
ENSG00000134905.17_6	365	176	228	648	759	898	3.028813	2.880139	2.372441	6.371314	7.092278	7.143974	ENSG00000134905	1.323272955	up	2.49E-08	3.66E-07	CARS2
ENSG00000134982.17_7	814	430	611	172	426	442	3.758079	2.212511	3.713006	0.993756	1.823351	1.053558	ENSG00000134982	-1.13251135	down	8.28E-05	0.000623347	APC
ENSG00000135002.12_6	238	204	318	345	717	1253	1.004262	1.702867	1.682749	1.827891	3.343765	6.305618	ENSG00000135002	1.260040608	up	0.00021241	0.001453739	RFK
ENSG00000135046.14_5	328926	195163	286336	1145556	1542080	1148750	2364.792969	3026.26001	2750.668457	9990.912109	13359.21387	10428.08203	ENSG00000135046	1.972493087	up	2.61E-37	3.42E-35	ANXA1
ENSG00000135069.14_4	1685	816	1222	20511	34034	25858	7.744103	8.314937	7.450973	115.75119	191.262344	151.767441	ENSG00000135069	4.171315927	up	2.03E-126	3.00E-123	PSAT1
ENSG00000135111.16_7	378	275	426	87	212	221	0.895031	1.373319	1.221066	0.22415	0.55605	0.601121	ENSG00000135111	-1.376404331	down	2.31E-05	0.000195989	TBX3
ENSG00000135114.12_4	5392	2187	3712	341	303	259	21.193331	19.429287	19.625599	1.395975	1.202604	1.00549	ENSG00000135114	-3.850865282	down	2.18E-72	8.04E-70	OASL
ENSG00000135116.9_8	12	3	14	142	224	186	0.020462	0.010853	0.030983	0.364191	0.468931	0.407807	ENSG00000135116	4.024742665	up	1.60E-14	5.21E-13	HRK
ENSG00000135245.10_5	7661	4830	5736	2021	1683	2242	60.857677	82.179855	57.968857	18.111919	15.416953	24.925442	ENSG00000135245	-1.893293809	down	1.01E-24	7.38E-23	HILPDA
ENSG00000135253.14_6	52	23	56	131	128	149	0.27141	0.250219	0.393062	0.800928	0.796861	0.870001	ENSG00000135253	1.413018256	up	0.001419369	0.007644128	KCP
ENSG00000135315.12_6	196	118	209	55	160	89	0.439369	0.670762	0.904792	0.129655	0.945539	0.56189	ENSG00000135315	-1.075780158	down	0.008168679	0.033628384	CEP162
ENSG00000135333.14_5	77	84	63	15	25	27	0.117159	0.299049	0.127051	0.025857	0.044897	0.05127	ENSG00000135333	-2.128327735	down	0.000247533	0.001660892	EPHA7
ENSG00000135365.15_9	1091	654	1009	303	499	478	4.333274	6.184114	6.134694	1.320654	2.755466	2.106483	ENSG00000135365	-1.391902643	down	3.20E-11	7.10E-10	PHF21A
ENSG00000135373.12_5	76	12	35	0	0	7	0.439981	0.447541	0.220958	0	0	0.026363	ENSG00000135373	-4.334046302	down	0.000283683	0.001874153	EHF
ENSG00000135437.10_4	289	171	237	23	38	94	2.632212	3.594288	2.870357	0.218974	0.364699	1.284292	ENSG00000135437	-2.483606571	down	1.84E-08	2.76E-07	RDH5
ENSG00000135446.17_8	7580	3696	5399	15255	17112	14148	41.057667	43.790047	39.406803	100.932861	111.79081	96.88414	ENSG00000135446	1.237866342	up	9.78E-14	2.94E-12	CDK4
ENSG00000135447.17_6	48	14	49	0	0	0	0.270768	0.156007	0.340484	0	0	0	ENSG00000135447	-7.832265666	down	2.53E-07	3.19E-06	PPP1R1A
ENSG00000135469.13_5	351	133	394	103	190	118	2.575998	1.954492	3.756943	0.893911	1.660388	0.964289	ENSG00000135469	-1.313125894	down	0.000179021	0.001248022	COQ10A
ENSG00000135472.9_7	357	299	382	129	117	49	0.99432	2.105869	1.376829	0.416327	0.301397	0.23116	ENSG00000135472	-2.090073348	down	5.71E-08	8.00E-07	FAIM2
ENSG00000135477.11_5	604	191	752	4175	4010	3909	3.571339	2.430014	5.947289	29.973379	28.593788	29.222183	ENSG00000135477	2.792683732	up	3.09E-27	2.66E-25	KRT87P
ENSG00000135480.16_5	180	117	146	1468	1471	1140	1.784808	3.176183	1.363531	17.762728	19.490408	16.196423	ENSG00000135480	2.936268298	up	3.93E-35	4.70E-33	KRT7
ENSG00000135540.11_9	576	204	446	1330	1519	1313	1.373659	1.259344	1.77489	6.116643	5.696083	4.811103	ENSG00000135540	1.558427412	up	4.06E-12	1.01E-10	NHSL1
ENSG00000135549.10	1252	781	1284	523	807	558	8.935931	12.007434	11.78288	4.757199	6.682549	4.897329	ENSG00000135549	-1.088572124	down	1.75E-07	2.27E-06	PKIB
ENSG00000135624.16_4	8942	3944	6418	24033	30046	25781	48.759426	46.387775	46.902328	171.02919	197.362564	185.304993	ENSG00000135624	1.812859631	up	1.20E-29	1.20E-27	CCT7
ENSG00000135636.14_5	19	8	11	77	66	114	0.02803	0.025561	0.020718	0.1375	0.11698	0.213677	ENSG00000135636	2.511569315	up	5.20E-05	0.00040856	DYSF
ENSG00000135720.13_7	17514	8721	13082	4184	7378	6947	41.530487	46.340481	42.398743	12.739704	21.587883	20.89152	ENSG00000135720	-1.359797146	down	1.12E-14	3.69E-13	DYNC1LI2
ENSG00000135740.17_7	163	112	150	89	37	68	0.35313	0.523948	0.449634	0.246748	0.096279	0.186799	ENSG00000135740	-1.382502107	down	0.002328663	0.011702808	SLC9A5
ENSG00000135821.19_6	20764	12835	16565	7736	6493	6256	31.392765	38.102619	34.12849	15.829102	12.652805	11.403865	ENSG00000135821	-1.551493217	down	1.73E-17	7.09E-16	GLUL
ENSG00000135828.11_4	261	229	239	108	165	175	0.628127	1.17258	0.757693	0.309352	0.470093	0.524063	ENSG00000135828	-1.044953847	down	0.001244288	0.006821044	RNASEL
ENSG00000135837.16_7	697	516	935	219	411	485	0.52456	0.863673	1.010294	0.200956	0.402835	0.531568	ENSG00000135837	-1.255498231	down	2.69E-06	2.80E-05	CEP350
ENSG00000135842.17_6	845	637	858	1319	2546	2465	1.234531	2.587425	1.676496	2.390154	4.588201	4.624695	ENSG00000135842	1.111191756	up	3.09E-07	3.86E-06	NIBAN1
ENSG00000135870.12_8	1411	1966	2334	145	294	348	1.239016	3.832383	2.740593	0.154326	0.311175	0.418462	ENSG00000135870	-3.256071083	down	6.32E-28	5.74E-26	RC3H1
ENSG00000135899.17_7	4362	2035	2934	328	393	624	19.16843	20.268593	18.514858	1.917087	2.364829	3.617491	ENSG00000135899	-3.057875304	down	7.00E-46	1.27E-43	SP110
ENSG00000135912.11_7	357	298	328	110	165	176	0.764967	1.384763	2.004347	0.412501	0.551522	0.503184	ENSG00000135912	-1.458072946	down	1.01E-06	1.15E-05	TTLL4
ENSG00000135974.10_4	314	90	258	713	674	770	1.260225	0.683712	1.257817	4.402946	4.922644	5.849036	ENSG00000135974	1.522476133	up	7.26E-08	9.99E-07	C2orf49
ENSG00000136003.15_3	1289	649	1306	6589	5779	9393	12.440797	13.396474	17.290426	77.727112	70.506584	118.683037	ENSG00000136003	2.502451163	up	1.30E-37	1.75E-35	ISCU
ENSG00000136010.14_7	107	33	40	304	429	492	0.129038	0.087126	0.064214	0.50253	0.656525	0.990358	ENSG00000136010	2.537768193	up	5.57E-12	1.35E-10	ALDH1L2
ENSG00000136068.15_6	1628	911	1342	4532	5049	6328	2.158793	2.271916	2.417905	7.637342	8.936594	10.027889	ENSG00000136068	1.765251136	up	1.63E-28	1.53E-26	FLNB
ENSG00000136111.14_9	568	291	578	133	166	240	1.802667	0.831562	1.87457	0.213183	0.5035	0.400595	ENSG00000136111	-1.674648293	down	7.21E-10	1.34E-08	TBC1D4
ENSG00000136147.18_7	106	116	129	41	48	78	0.694604	1.881868	1.22945	0.328521	0.446499	0.6302	ENSG00000136147	-1.431308538	down	0.001809214	0.009412939	PHF11
ENSG00000136153.20_10	981	481	673	298	420	377	2.756894	3.164675	2.581936	0.874331	1.889758	1.473778	ENSG00000136153	-1.22369565	down	3.66E-08	5.27E-07	LMO7
ENSG00000136155.17_4	4	0	0	20	23	19	0.010584	0	0	0.076224	0.086743	0.074975	ENSG00000136155	3.844335534	up	0.010755851	0.042160723	SCEL
ENSG00000136167.14_7	44	19	31	100	78	185	0.126886	0.100644	0.105279	0.318452	0.246247	0.595459	ENSG00000136167	1.699917097	up	0.001087972	0.006058403	LCP1
ENSG00000136206.4_4	2119	1360	1702	943	809	694	13.110042	18.073338	14.014611	7.937398	6.760839	6.075607	ENSG00000136206	-1.345585136	down	4.60E-10	8.77E-09	SPDYE1
ENSG00000136244.12_7	81	74	97	928	1429	730	0.808523	1.471412	1.424662	8.823551	16.424063	8.637556	ENSG00000136244	3.307326	up	5.54E-29	5.29E-27	IL6
ENSG00000136295.15_4	2017	1210	1378	551	690	776	4.557197	6.175996	4.623855	1.399191	2.075149	2.05219	ENSG00000136295	-1.481851197	down	4.23E-14	1.32E-12	TTYH3
ENSG00000136371.11_5	221	172	349	589	842	501	1.467764	2.072306	2.421656	3.339372	4.939474	2.773187	ENSG00000136371	1.106480626	up	0.000136692	0.000981034	MTHFS
ENSG00000136436.14_9	4115	2030	3188	7108	9509	9213	12.421479	18.689878	12.820576	26.045803	42.1133	34.273605	ENSG00000136436	1.212119088	up	5.92E-16	2.17E-14	CALCOCO2
ENSG00000136514.3_4	741	324	493	130	110	52	4.966586	4.683695	4.416158	1.052551	0.88737	0.435827	ENSG00000136514	-2.615803625	down	1.40E-13	4.15E-12	RTP4
ENSG00000136531.17_9	31	14	50	0	12	0	0.032388	0.024673	0.242356	0	0.014166	0	ENSG00000136531	-3.256941247	down	0.009770142	0.038943635	SCN2A
ENSG00000136542.9_4	296	289	412	12	23	22	0.320751	1.366475	0.782048	0.014081	0.026737	0.026968	ENSG00000136542	-4.462954877	down	1.09E-30	1.13E-28	GALNT5
ENSG00000136628.18_5	2985	1692	2257	4326	6403	6387	6.240689	7.637843	6.323158	11.144632	16.202347	16.806091	ENSG00000136628	1.019758836	up	4.55E-10	8.67E-09	EPRS1
ENSG00000136634.7_9	107	73	107	0	0	0	0.657899	0.963423	0.87854	0	0	0	ENSG00000136634	-9.303528428	down	1.13E-12	2.96E-11	IL10
ENSG00000136717.15_7	68	5	39	109	181	119	0.271848	0.018472	0.209315	0.485729	0.716493	0.633577	ENSG00000136717	1.748510067	up	0.003291227	0.015669504	BIN1
ENSG00000136732.16_6	26	12	16	47	77	142	0.142025	0.140512	0.115268	0.311775	0.516543	1.74834	ENSG00000136732	2.012889918	up	0.001133843	0.006284187	GYPC
ENSG00000136770.11_7	243	97	192	320	390	617	1.162963	0.993619	1.224952	1.857599	2.265935	3.753178	ENSG00000136770	1.075717876	up	0.000351894	0.002275118	DNAJC1
ENSG00000136826.15_7	40	22	20	214	258	279	0.13401	0.16192	0.087359	0.96381	1.151635	1.478964	ENSG00000136826	2.915649355	up	4.38E-13	1.21E-11	KLF4
ENSG00000136830.12_6	637	232	281	194	204	227	1.873066	1.357278	0.955465	0.728603	0.624677	0.730539	ENSG00000136830	-1.101867601	down	0.000422195	0.002673258	NIBAN2
ENSG00000136859.10_5	395	229	369	850	679	1229	1.151845	1.441903	1.559553	3.010949	2.549684	4.535627	ENSG00000136859	1.209233161	up	1.17E-06	1.31E-05	ANGPTL2
ENSG00000136868.11_4	2847	1977	2775	5521	6975	6466	6.898785	9.486406	8.055575	16.756561	19.783142	19.279427	ENSG00000136868	1.028155719	up	1.38E-11	3.22E-10	SLC31A1
ENSG00000136930.13_5	43400	17365	30663	101323	105817	91344	444.478607	384.040894	419.852203	1258.030884	1304.78186	1181.053589	ENSG00000136930	1.494932859	up	3.89E-17	1.56E-15	PSMB7
ENSG00000136933.17_5	1520	730	1165	5887	6430	5221	9.919884	10.114934	10.198004	44.269978	48.98745	41.321468	ENSG00000136933	2.1246715	up	2.23E-33	2.53E-31	RABEPK
ENSG00000136938.9_4	2084	759	1622	4930	6771	7486	14.264786	11.289156	14.834311	40.724888	55.36314	64.202263	ENSG00000136938	1.879710023	up	7.37E-23	4.87E-21	ANP32B
ENSG00000136997.20_9	668	371	549	1830	2719	2054	2.172999	2.208081	3.007317	9.366979	13.458679	10.804972	ENSG00000136997	1.786544697	up	2.47E-21	1.43E-19	MYC
ENSG00000137106.18_5	3620	938	2091	5718	6554	5467	29.442259	16.121817	22.828402	58.208706	64.246384	59.266205	ENSG00000137106	1.245401931	up	1.78E-07	2.31E-06	GRHPR
ENSG00000137133.11_6	403	217	511	1090	1373	1670	5.866466	6.775096	10.325666	19.507879	25.120329	30.782845	ENSG00000137133	1.615719648	up	4.08E-13	1.13E-11	HINT2
ENSG00000137154.13_5	79485	35246	57593	140379	142174	133765	584.885254	559.587463	566.962524	1252.627808	1264.325317	1243.553711	ENSG00000137154	1.046649333	up	1.52E-10	3.09E-09	RPS6
ENSG00000137166.15_6	262	85	149	65	108	82	0.441821	0.30953	0.337574	0.131467	0.219746	0.174718	ENSG00000137166	-1.176944014	down	0.003328235	0.01581309	FOXP4
ENSG00000137193.14_5	187	122	209	425	687	704	0.695552	0.976006	1.089968	1.914647	3.079358	3.30744	ENSG00000137193	1.519274297	up	4.05E-09	6.68E-08	PIM1
ENSG00000137198.10_4	630	308	461	235	249	349	4.410064	4.671484	4.229627	2.095166	2.434908	3.141473	ENSG00000137198	-1.004918371	down	6.82E-05	0.000524251	GMPR
ENSG00000137200.13_4	294	182	253	114	125	123	0.793485	0.972519	1.012318	0.417209	0.429664	0.411916	ENSG00000137200	-1.283559863	down	2.42E-05	0.000204783	CMTR1
ENSG00000137216.19_5	185	70	91	56	68	65	0.702572	0.454269	0.366939	0.203801	0.245856	0.246712	ENSG00000137216	-1.101681532	down	0.013090577	0.049456318	TMEM63B
ENSG00000137269.15_4	402	196	446	163	132	202	1.658721	1.607798	2.731002	0.695521	0.591742	0.87961	ENSG00000137269	-1.300603741	down	1.66E-05	0.000146135	LRRC1
ENSG00000137309.20_4	116	30	78	236	171	188	0.610855	0.300521	0.540603	1.45114	1.098582	1.104614	ENSG00000137309	1.249597997	up	0.002959394	0.014320726	HMGA1
ENSG00000137310.12_4	2262	1010	1558	639	970	771	7.09202	6.976988	6.573934	2.434089	3.708874	3.034324	ENSG00000137310	-1.268858535	down	1.88E-10	3.79E-09	TCF19
ENSG00000137312.15_7	8166	4250	7398	22235	27877	38757	46.417614	52.865841	58.429428	150.384155	187.94957	272.801392	ENSG00000137312	1.898840314	up	4.64E-29	4.48E-27	FLOT1
ENSG00000137331.12_5	113	65	168	29	47	94	0.910435	1.034137	1.665668	0.255076	0.448908	0.957669	ENSG00000137331	-1.304724654	down	0.009754295	0.038893605	IER3
ENSG00000137393.10_3	89	67	77	0	4	24	0.176322	0.286993	0.205203	0	0.009637	0.059108	ENSG00000137393	-3.440568839	down	4.42E-05	0.0003524	RNF144B
ENSG00000137434.11_6	52	60	51	253	246	147	0.878051	1.947043	1.082239	5.087732	4.69297	3.027814	ENSG00000137434	1.65460309	up	0.000150184	0.001065233	C6orf52
ENSG00000137460.8_3	148	105	160	37	20	11	0.226072	0.343576	0.326054	0.067118	0.036807	0.020287	ENSG00000137460	-2.833346436	down	1.01E-07	1.36E-06	FHDC1
ENSG00000137486.17_9	376	218	330	128	163	71	0.515579	0.70492	0.740974	0.234828	0.268729	0.461997	ENSG00000137486	-1.603088497	down	5.00E-06	4.94E-05	ARRB1
ENSG00000137500.9_6	1416	664	1258	3705	3542	3765	8.577802	6.663993	9.529631	28.551386	25.00062	37.95916	ENSG00000137500	1.493514505	up	1.20E-17	5.01E-16	CCDC90B
ENSG00000137501.17_6	1395	902	1362	333	415	365	5.692173	8.090443	7.210195	2.439865	2.539361	2.301293	ENSG00000137501	-1.995034844	down	1.37E-25	1.07E-23	SYTL2
ENSG00000137502.10_6	315	281	316	140	157	184	0.906021	0.93796	1.616223	0.55305	0.67536	0.820989	ENSG00000137502	-1.250420856	down	2.72E-05	0.000227816	RAB30
ENSG00000137513.10_8	235	112	358	565	749	1010	1.035097	0.953413	3.089898	3.091254	3.770307	5.399702	ENSG00000137513	1.481373856	up	4.50E-07	5.48E-06	NARS2
ENSG00000137558.9_5	898	439	895	8	12	38	1.540347	1.563104	2.282883	0.014353	0.020784	0.071389	ENSG00000137558	-5.535422785	down	1.23E-49	2.52E-47	PI15
ENSG00000137571.11_6	136	95	141	23	60	42	0.151619	0.245469	0.209564	0.030409	0.080345	0.059225	ENSG00000137571	-1.886224798	down	4.64E-05	0.000368112	SLCO5A1
ENSG00000137573.14_5	4978	3525	4285	127	108	180	11.924195	32.53899	18.837685	0.569985	0.226585	0.700754	ENSG00000137573	-5.245036459	down	1.33E-140	2.85E-137	SULF1
ENSG00000137575.12_5	10495	6624	8381	41819	47577	51730	49.213795	68.613937	53.75172	236.927475	264.26123	302.790375	ENSG00000137575	2.182560493	up	4.46E-51	9.49E-49	SDCBP
ENSG00000137628.17_6	627	378	696	53	114	71	1.125595	1.581957	2.268713	0.106825	0.227129	0.148682	ENSG00000137628	-3.11604189	down	2.77E-26	2.25E-24	DDX60
ENSG00000137673.9_5	4126	3212	4745	48	42	80	37.046932	62.196579	56.930397	0.513497	0.4473	0.898721	ENSG00000137673	-6.454312495	down	6.38E-172	3.01E-168	MMP7
ENSG00000137692.12_5	553	427	694	1072	1791	2146	3.087973	1.953445	5.334643	7.938847	10.914101	13.219424	ENSG00000137692	1.266138928	up	3.29E-08	4.77E-07	DCUN1D5
ENSG00000137720.8_7	471	146	319	1428	1238	975	4.503561	2.209393	5.038282	20.903843	15.41806	15.399845	ENSG00000137720	1.787645938	up	7.94E-11	1.68E-09	C11orf1
ENSG00000137726.17_7	1755	865	1287	303	263	377	10.592537	11.231713	10.435285	1.741702	1.895698	2.906921	ENSG00000137726	-2.298149418	down	8.91E-27	7.52E-25	FXYD6
ENSG00000137745.12_5	267	190	416	46	19	18	0.989696	1.517388	2.059515	0.204594	0.081239	0.081616	ENSG00000137745	-3.606522721	down	9.73E-16	3.51E-14	MMP13
ENSG00000137767.14_8	2156	1070	1903	1006	1002	928	12.873455	13.721941	15.181512	7.336668	7.279374	6.937911	ENSG00000137767	-1.038656371	down	1.86E-08	2.79E-07	SQOR
ENSG00000137801.11_5	13283	6209	8327	3806	4440	5581	18.295496	19.701811	16.243849	6.049847	7.292115	9.790231	ENSG00000137801	-1.265528451	down	7.17E-13	1.93E-11	THBS1
ENSG00000137804.14_8	25247	14042	16030	8935	12465	10102	115.589165	136.567978	96.611893	48.439877	67.26963	56.99052	ENSG00000137804	-1.090871789	down	4.39E-10	8.40E-09	NUSAP1
ENSG00000137812.20_8	686	347	613	197	315	297	1.027891	0.945268	1.321946	0.336926	0.529369	0.544591	ENSG00000137812	-1.287606225	down	6.88E-08	9.51E-07	KNL1
ENSG00000137818.12_4	26155	9921	13548	42125	41522	34396	224.648636	186.884872	153.19458	439.056824	436.857086	362.928894	ENSG00000137818	1.042201289	up	9.07E-07	1.04E-05	RPLP1
ENSG00000137821.11_7	254	164	323	896	1270	971	0.876637	0.603265	1.690071	2.922401	2.43439	3.277902	ENSG00000137821	1.813888068	up	4.95E-15	1.70E-13	LRRC49
ENSG00000137825.11_5	58	26	70	322	243	340	0.316882	0.301277	0.52196	2.213121	1.605751	2.372216	ENSG00000137825	2.338358003	up	2.79E-10	5.46E-09	ITPKA
ENSG00000137857.17_4	102	48	73	15	31	27	1.182566	0.180738	0.759497	0.283535	0.215066	0.455377	ENSG00000137857	-1.88000332	down	0.000828015	0.004812927	DUOX1
ENSG00000137868.19_7	3898	1606	2735	699	641	886	14.770241	13.684204	14.348006	3.149001	3.039179	4.267931	ENSG00000137868	-2.113821691	down	2.28E-26	1.87E-24	STRA6
ENSG00000137872.17_7	107	93	125	27	27	35	0.24929	0.694305	0.378024	0.146493	0.05245	0.079618	ENSG00000137872	-2.179860032	down	4.78E-06	4.76E-05	SEMA6D
ENSG00000137876.10_5	1595	1187	1577	6906	10120	8782	8.667138	13.634535	11.226694	44.660965	65.223412	59.336258	ENSG00000137876	2.258876858	up	4.28E-42	6.65E-40	RSL24D1
ENSG00000137877.10_5	96	53	92	248	389	383	0.091151	0.100667	0.113504	0.327832	0.659475	0.495766	ENSG00000137877	1.807622883	up	7.29E-09	1.16E-07	SPTBN5
ENSG00000137880.6_4	1130	506	586	219	233	287	15.540464	14.903609	10.727183	3.64568	3.855762	4.974135	ENSG00000137880	-1.838962173	down	1.07E-12	2.81E-11	GCHFR
ENSG00000137941.17_6	508	250	392	90	138	122	1.363353	1.377251	1.538434	0.136147	0.258708	0.193113	ENSG00000137941	-1.976421448	down	1.69E-12	4.35E-11	TTLL7
ENSG00000137959.16_5	28206	16016	20576	425	157	379	108.675476	162.441711	132.453735	2.825363	1.028706	1.371271	ENSG00000137959	-6.310841762	down	3.08E-47	5.77E-45	IFI44L
ENSG00000137965.11_4	5065	2148	3348	219	258	224	33.273174	30.079628	28.326706	1.590615	2.358523	2.174826	ENSG00000137965	-4.143977871	down	3.30E-101	2.99E-98	IFI44
ENSG00000137970.7_4	23893	12298	24602	66757	62732	57836	321.802399	357.458527	443.025787	1090.761963	1018.082764	984.109924	ENSG00000137970	1.396164547	up	2.92E-16	1.10E-14	NA
ENSG00000137996.12_3	985	654	1154	2320	2815	2607	4.047642	6.006354	6.954846	13.404934	15.829237	13.65037	ENSG00000137996	1.198511876	up	6.13E-12	1.48E-10	RTCA
ENSG00000138061.12_8	503	364	576	23	1	2	0.968115	1.707646	1.963485	0.079641	0.015102	0.087963	ENSG00000138061	-5.938437444	down	1.09E-06	1.23E-05	CYP1B1
ENSG00000138095.19_5	400	236	489	943	1211	1181	0.724373	0.864991	1.408707	1.886913	2.302426	2.425367	ENSG00000138095	1.307520729	up	5.58E-10	1.05E-08	LRPPRC
ENSG00000138135.7_4	467	289	510	25	27	60	2.778259	3.714446	4.061911	0.177097	0.191694	0.45043	ENSG00000138135	-3.784020344	down	2.06E-27	1.80E-25	CH25H
ENSG00000138166.6_4	41	3	19	99	66	112	0.166479	0.025715	0.102751	0.48684	0.321721	0.570142	ENSG00000138166	2.033425157	up	0.002728737	0.013382888	DUSP5
ENSG00000138316.11_4	244	154	255	34	16	19	0.440753	0.600566	0.615903	0.07462	0.033277	0.042636	ENSG00000138316	-3.475785864	down	1.60E-15	5.67E-14	ADAMTS14
ENSG00000138326.21_9	11535	4212	7387	20543	19963	15498	193.8918	149.492371	165.733826	440.767975	414.026276	334.822388	ENSG00000138326	1.080568693	up	2.29E-07	2.92E-06	RPS24
ENSG00000138336.9_5	694	273	413	60	55	121	0.725893	0.616338	0.577998	0.07497	0.068327	0.159302	ENSG00000138336	-2.789398389	down	2.80E-16	1.06E-14	TET1
ENSG00000138346.15_6	220	106	168	60	81	85	0.688493	0.528833	0.709413	0.171054	0.380907	0.381644	ENSG00000138346	-1.384965169	down	0.000161349	0.001136571	DNA2
ENSG00000138363.15_6	1065	406	926	2011	2564	2290	5.231504	4.553845	6.17439	12.080198	15.518838	14.549795	ENSG00000138363	1.301847961	up	5.84E-11	1.25E-09	ATIC
ENSG00000138382.15_7	3463	1409	2498	7811	8507	5804	38.228619	32.993248	34.084328	103.356827	110.960892	79.186447	ENSG00000138382	1.376159151	up	2.32E-11	5.23E-10	METTL5
ENSG00000138413.13_4	1577	834	1401	10383	8978	11470	6.908535	8.09938	8.158943	53.708195	46.435307	61.865398	ENSG00000138413	2.771165636	up	1.23E-61	3.58E-59	IDH1
ENSG00000138434.17_6	1304	786	1037	236	319	501	2.629191	3.79641	2.87885	0.554764	0.845882	1.228406	ENSG00000138434	-1.86594744	down	1.32E-14	4.31E-13	ITPRID2
ENSG00000138435.16_6	23	12	40	0	0	0	0.108629	0.115507	0.249181	0	0	0	ENSG00000138435	-7.30779921	down	8.25E-06	7.77E-05	CHRNA1
ENSG00000138442.10_4	924	419	859	2200	2923	2128	1.571127	1.753999	2.523653	4.697887	5.335715	4.011353	ENSG00000138442	1.488361052	up	4.85E-14	1.51E-12	WDR12
ENSG00000138448.12_5	563	560	694	208	326	362	3.827737	5.138009	5.820048	0.474797	0.915788	1.664192	ENSG00000138448	-1.368753401	down	3.23E-07	4.02E-06	ITGAV
ENSG00000138495.6_5	1416	784	1207	3794	2699	1750	22.498262	26.76671	25.503319	73.215172	52.538734	36.316139	ENSG00000138495	1.058679113	up	7.71E-05	0.000584518	COX17
ENSG00000138496.16_5	5358	2860	4257	464	540	656	12.457331	13.635799	13.754309	1.6009	1.95868	2.189872	ENSG00000138496	-3.175647884	down	1.99E-83	1.02E-80	PARP9
ENSG00000138587.6_5	993	479	925	192	342	279	4.91521	5.240139	6.120201	1.246992	2.034037	1.823897	ENSG00000138587	-1.816073588	down	1.19E-14	3.93E-13	MNS1
ENSG00000138593.9_6	845	413	760	195	352	419	4.051361	2.444935	4.061819	0.697269	1.956443	2.618351	ENSG00000138593	-1.333181366	down	1.95E-07	2.51E-06	SECISBP2L
ENSG00000138621.12_7	248	145	234	1206	1361	811	1.656499	2.460991	2.051351	14.504342	14.749332	8.606223	ENSG00000138621	2.181862855	up	1.80E-17	7.34E-16	PPCDC
ENSG00000138640.15_8	495	196	374	157	165	219	1.521232	0.958625	1.112601	0.485948	0.478903	0.546398	ENSG00000138640	-1.20397729	down	2.63E-05	0.00022103	FAM13A
ENSG00000138641.18_9	185	8	76	22	6	25	0.498204	0.062211	0.352663	0.060963	0.042837	0.118615	ENSG00000138641	-2.389109203	down	0.003329381	0.01581309	HERC3
ENSG00000138642.15_4	1312	625	1090	161	196	226	3.944361	4.112439	4.247621	0.544548	0.71614	0.792957	ENSG00000138642	-2.625565954	down	4.31E-35	5.14E-33	HERC6
ENSG00000138646.9_5	218	86	145	25	41	56	0.624468	0.525943	0.55295	0.084426	0.140834	0.199451	ENSG00000138646	-2.130009955	down	1.52E-06	1.66E-05	HERC5
ENSG00000138653.10_5	19	12	11	0	0	0	0.053128	0.075601	0.042558	0	0	0	ENSG00000138653	-6.543343643	down	0.000470933	0.002933855	NDST4
ENSG00000138670.17_6	97	41	95	172	201	307	0.321269	0.2925	0.419977	0.69499	0.805591	1.312244	ENSG00000138670	1.303184287	up	0.000470445	0.002931585	RASGEF1B
ENSG00000138685.16_7	16	12	9	178	330	353	0.023601	0.036419	0.015994	0.394609	0.614411	0.716609	ENSG00000138685	4.216589058	up	1.42E-20	7.68E-19	FGF2
ENSG00000138688.15_4	300	171	355	160	109	191	0.193363	0.23257	0.303704	0.12229	0.082425	0.151661	ENSG00000138688	-1.0860491	down	0.001008839	0.005691597	KIAA1109
ENSG00000138696.11_7	355	289	335	132	152	158	0.639268	1.12271	1.144385	0.286953	0.32824	0.359118	ENSG00000138696	-1.461514548	down	3.70E-07	4.56E-06	BMPR1B
ENSG00000138698.15_5	1144	607	1009	3221	3437	3065	3.110035	3.973678	3.876383	10.728149	11.481517	11.147852	ENSG00000138698	1.57085068	up	2.61E-20	1.40E-18	RAP1GDS1
ENSG00000138772.13_6	384	213	229	1704	2049	1920	2.67887	2.868476	2.13056	14.512784	17.318251	17.003582	ENSG00000138772	2.505538568	up	1.14E-32	1.27E-30	ANXA3
ENSG00000138795.10_7	154	49	144	21	62	63	0.873982	0.684044	1.011693	0.08974	0.240943	0.267966	ENSG00000138795	-1.483605477	down	0.003980044	0.018417749	LEF1
ENSG00000138801.9_5	1269	739	1305	362	430	636	5.153329	6.601688	8.279654	1.994111	2.088368	3.894339	ENSG00000138801	-1.489166877	down	7.11E-12	1.71E-10	PAPSS1
ENSG00000138964.17_6	86	38	88	13	30	26	0.291155	0.279627	0.405892	0.044791	0.134903	0.126811	ENSG00000138964	-1.87327488	down	0.001463489	0.007858431	PARVG
ENSG00000139044.12_6	132	122	116	35	56	80	0.272371	0.481064	0.323618	0.091093	0.122057	0.183791	ENSG00000139044	-1.476560927	down	0.001113216	0.006182932	B4GALNT3
ENSG00000139154.16_9	393	342	354	205	267	167	0.681738	1.293482	0.987191	0.662836	0.553442	0.390673	ENSG00000139154	-1.089540028	down	0.000330299	0.002146674	AEBP2
ENSG00000139178.11_7	442	406	411	183	202	235	3.804995	4.39231	3.895393	0.975151	1.748833	1.904668	ENSG00000139178	-1.358112771	down	1.19E-06	1.34E-05	C1RL
ENSG00000139182.15_7	495	297	318	117	114	127	1.398152	1.797762	1.182195	0.491647	0.468048	0.478104	ENSG00000139182	-1.911476919	down	7.78E-11	1.64E-09	CLSTN3
ENSG00000139192.12_5	1125	572	1004	543	433	527	6.369343	6.956501	7.76025	3.779373	2.994225	3.968243	ENSG00000139192	-1.078643656	down	8.69E-07	1.00E-05	TAPBPL
ENSG00000139211.6_3	1258	719	1127	2310	2877	3906	3.851364	4.152649	4.352255	8.016912	9.740957	14.89578	ENSG00000139211	1.271937155	up	2.82E-12	7.09E-11	AMIGO2
ENSG00000139266.6_5	534	297	676	1095	1329	1353	2.845931	3.200888	5.284285	6.649194	7.771329	9.012343	ENSG00000139266	1.076232649	up	3.22E-07	4.01E-06	MARCHF9
ENSG00000139269.3_4	31	22	37	1851	2237	2308	0.122724	0.189334	0.200165	9.180598	11.02297	11.925631	ENSG00000139269	5.875862149	up	6.02E-131	1.09E-127	INHBE
ENSG00000139318.8_6	2991	1382	2216	521	936	917	8.917006	9.663352	8.547589	1.760821	3.216873	3.266907	ENSG00000139318	-1.736972624	down	1.36E-17	5.65E-16	DUSP6
ENSG00000139329.5_5	2869	2230	1584	60	43	64	10.80352	18.122414	7.977513	0.273325	0.194626	0.300691	ENSG00000139329	-5.647762443	down	1.52E-86	8.32E-84	LUM
ENSG00000139410.15_9	358	231	450	936	1162	1022	2.751581	5.186682	4.633796	8.734593	10.781158	9.943005	ENSG00000139410	1.321462816	up	1.07E-09	1.93E-08	SDSL
ENSG00000139514.13_6	595	246	627	1342	2030	2125	0.858645	0.726156	1.289286	2.229601	3.408275	3.676996	ENSG00000139514	1.669735003	up	3.41E-14	1.07E-12	SLC7A1
ENSG00000139531.13_6	437	268	517	255	180	214	1.993038	2.032642	3.383079	1.518492	0.955664	1.527671	ENSG00000139531	-1.150780197	down	6.70E-05	0.000515818	SUOX
ENSG00000139625.13_6	99	49	89	29	21	50	0.240329	0.222683	0.24124	0.21534	0.067553	0.119094	ENSG00000139625	-1.495985525	down	0.006341219	0.0273097	MAP3K12
ENSG00000139641.12_4	1794	965	1656	4094	4718	5379	4.192786	5.242919	5.224154	11.525478	13.422416	15.699149	ENSG00000139641	1.425790583	up	6.72E-21	3.77E-19	ESYT1
ENSG00000139645.10_5	769	365	550	209	189	266	1.131299	1.504237	0.916494	0.552615	0.509784	0.550451	ENSG00000139645	-1.587672557	down	3.10E-10	6.03E-09	ANKRD52
ENSG00000139679.15_4	228	102	237	56	32	66	0.805827	0.73499	1.189112	0.248486	0.152662	0.298407	ENSG00000139679	-2.095063533	down	6.08E-07	7.21E-06	LPAR6
ENSG00000139915.21_10	41	30	26	84	104	154	0.070998	0.123572	0.059985	0.232442	0.24815	0.398131	ENSG00000139915	1.492352568	up	0.003049377	0.014692904	MDGA2
ENSG00000139921.13_4	2862	2213	2422	1106	1314	1197	7.262784	12.335433	8.11445	3.359533	4.004952	3.777855	ENSG00000139921	-1.36310016	down	3.56E-13	9.93E-12	TMX1
ENSG00000139971.15_9	538	381	547	138	147	202	1.081666	1.839964	1.226863	0.714875	1.080757	1.134802	ENSG00000139971	-1.884398716	down	3.36E-13	9.42E-12	ARMH4
ENSG00000140044.13_6	0	6	21	69	34	146	0	0.219478	0.051972	0.750201	0.419242	0.929613	ENSG00000140044	2.891112882	up	0.00153838	0.008197168	JDP2
ENSG00000140090.17_5	4	21	5	0	0	0	0.003492	0.043647	0.005408	0	0	0	ENSG00000140090	-6.353953846	down	0.001924936	0.009929658	SLC24A4
ENSG00000140092.14_6	181	140	234	40	74	75	0.824277	1.253808	1.436996	0.198807	0.366049	0.39162	ENSG00000140092	-1.864340807	down	1.29E-06	1.43E-05	FBLN5
ENSG00000140093.10_5	0	15	15	0	0	0	0	0.063206	0.039734	0	0	0	ENSG00000140093	-6.250899764	down	0.006133753	0.026546982	SERPINA10
ENSG00000140104.14_7	150	94	99	252	373	289	1.010419	1.051168	0.606775	1.538024	2.169343	1.867997	ENSG00000140104	1.120169246	up	0.000452694	0.002830687	CLBA1
ENSG00000140105.18_7	16591	8740	11644	57851	68379	68286	65.6511	76.697006	62.425343	277.792694	326.832581	339.380432	ENSG00000140105	2.131986967	up	6.07E-47	1.13E-44	WARS1
ENSG00000140379.8_5	23	4	10	0	0	0	0.292545	0.08267	0.171083	0	0	0	ENSG00000140379	-6.209121481	down	0.002298223	0.01156707	BCL2A1
ENSG00000140450.9_4	99	27	116	32	15	34	0.244649	0.143978	0.38292	0.095633	0.044569	0.104222	ENSG00000140450	-1.734701097	down	0.005193753	0.023057843	ARRDC4
ENSG00000140464.20_8	2076	895	1703	776	821	792	4.794601	4.58888	5.52397	2.45529	2.351081	2.339587	ENSG00000140464	-1.191440347	down	4.46E-10	8.51E-09	PML
ENSG00000140511.12_5	661	413	765	201	249	210	3.614977	5.023532	6.02409	0.795629	0.979598	0.915653	ENSG00000140511	-1.741844722	down	2.32E-13	6.70E-12	HAPLN3
ENSG00000140632.17_6	296	93	273	72	156	96	1.745034	0.82543	1.927568	0.276824	0.72855	0.807442	ENSG00000140632	-1.242289091	down	0.001536097	0.008186855	GLYR1
ENSG00000140830.9_5	492	243	453	1204	1620	950	3.626328	2.091108	2.414369	5.823876	8.280049	4.961866	ENSG00000140830	1.430332337	up	2.01E-09	3.46E-08	TXNL4B
ENSG00000140836.17_10	478	301	450	160	118	183	0.663032	0.378751	0.352648	0.455164	0.126397	0.379651	ENSG00000140836	-1.680217315	down	3.37E-09	5.61E-08	ZFHX3
ENSG00000140839.11_4	130	61	82	19	52	33	0.731113	0.628928	0.58572	0.098829	0.299558	0.238547	ENSG00000140839	-1.669913245	down	0.001631593	0.008606425	CLEC18B
ENSG00000140853.15_7	841	447	530	299	291	279	2.305251	2.783931	2.491228	1.630916	2.093906	1.075918	ENSG00000140853	-1.321089572	down	9.34E-08	1.26E-06	NLRC5
ENSG00000140941.14_5	3035	1741	2633	7365	10227	7164	13.294338	17.548105	16.463715	41.218914	58.049526	42.749325	ENSG00000140941	1.474717103	up	5.34E-18	2.31E-16	MAP1LC3B
ENSG00000140961.14_6	265	54	105	391	575	386	1.38303	0.49029	0.585943	2.503825	3.621865	2.550864	ENSG00000140961	1.507797089	up	6.01E-05	0.000467062	OSGIN1
ENSG00000140988.16_8	4522	2246	4784	16319	18838	23357	42.705845	52.160561	60.191872	186.906982	213.149918	277.342255	ENSG00000140988	2.095459217	up	7.46E-37	9.56E-35	RPS2
ENSG00000141027.21_8	2278	1465	2500	3879	5268	8464	8.686176	13.37955	11.000206	21.808338	24.376032	40.928413	ENSG00000141027	1.199672662	up	1.59E-08	2.41E-07	NCOR1
ENSG00000141034.10_5	97	83	204	312	306	370	0.42938	0.471624	0.683382	1.255322	0.953237	1.231941	ENSG00000141034	1.095077204	up	0.001817398	0.009451351	GID4
ENSG00000141198.16_9	655	186	401	1498	2082	1669	4.153727	2.902203	3.747949	9.234208	12.782947	11.161605	ENSG00000141198	1.885453459	up	2.61E-14	8.30E-13	TOM1L1
ENSG00000141298.19_7	275	117	230	86	131	140	1.862782	1.293939	1.629194	1.068243	1.608799	0.960539	ENSG00000141298	-1.046012433	down	0.001868742	0.009677855	SSH2
ENSG00000141337.12_6	265	210	304	1605	1523	1295	0.572694	0.981012	0.879611	4.21799	3.97582	3.634041	ENSG00000141337	2.226543635	up	2.44E-22	1.52E-20	ARSG
ENSG00000141338.14_8	11	5	9	0	0	0	0.039838	0.062653	0.018109	0	0	0	ENSG00000141338	-5.735579361	down	0.010362506	0.040924705	ABCA8
ENSG00000141378.15_4	2447	881	1907	5649	6050	4490	32.236565	25.492985	34.06955	89.721169	96.115463	73.4356	ENSG00000141378	1.434572921	up	1.11E-11	2.61E-10	PTRH2
ENSG00000141428.17_6	129	41	96	201	297	151	1.298391	0.86981	1.289558	2.590532	3.626622	1.944597	ENSG00000141428	1.089059787	up	0.006865333	0.029132798	C18orf21
ENSG00000141441.16_6	108	115	226	70	83	56	0.145155	0.334702	0.40717	0.114579	0.324271	0.095635	ENSG00000141441	-1.394424548	down	0.001512116	0.008069976	GAREM1
ENSG00000141446.11_5	591	370	575	206	310	302	1.323481	1.679519	1.61816	0.526612	0.786052	0.84768	ENSG00000141446	-1.195027445	down	3.73E-07	4.58E-06	ESCO1
ENSG00000141452.10_5	166	48	88	271	294	394	0.754586	0.465435	0.7636	1.561023	1.691205	2.365345	ENSG00000141452	1.461698139	up	3.38E-05	0.000277646	RMC1
ENSG00000141458.13_6	403	165	378	673	795	941	2.501026	2.289696	3.31976	4.425768	5.78588	5.673719	ENSG00000141458	1.119446304	up	1.80E-06	1.94E-05	NPC1
ENSG00000141469.18_7	811	614	936	0	12	9	2.625484	5.762188	3.838113	0	0.036645	0.026782	ENSG00000141469	-7.16858524	down	2.63E-18	1.17E-16	SLC14A1
ENSG00000141503.17_6	403	232	295	109	104	145	0.882621	0.949322	0.769751	0.279039	0.254679	0.364897	ENSG00000141503	-1.651153547	down	3.82E-08	5.49E-07	MINK1
ENSG00000141540.11_4	36	39	55	0	17	15	0.106992	0.440264	0.21132	0	0.056118	0.052477	ENSG00000141540	-2.423763499	down	0.008838132	0.035889231	TTYH2
ENSG00000141543.12_8	411	232	585	1100	1257	2228	1.688651	2.095769	4.279921	5.513688	6.190138	11.50403	ENSG00000141543	1.638692469	up	7.19E-10	1.34E-08	EIF4A3
ENSG00000141570.11_6	12	0	14	12	48	121	0.031177	0	0.048521	0.036261	0.153113	0.409032	ENSG00000141570	2.616155274	up	0.008326138	0.034180605	CBX8
ENSG00000141622.14_5	100	129	196	476	673	757	0.127751	0.405423	0.40773	0.956428	1.085487	1.384658	ENSG00000141622	1.819653717	up	7.65E-09	1.21E-07	RNF165
ENSG00000141664.10_6	237	131	261	130	116	102	0.401112	0.473538	0.591543	0.272715	0.24082	0.220614	ENSG00000141664	-1.086579493	down	0.001464656	0.007861931	ZCCHC2
ENSG00000141837.21_6	539	281	333	159	138	136	1.962114	2.416071	1.914961	0.928629	0.488302	0.598631	ENSG00000141837	-1.6616786	down	1.95E-08	2.91E-07	CACNA1A
ENSG00000141854.9_6	37	29	16	119	95	166	0.185579	0.566887	0.10633	1.129711	0.721758	1.164172	ENSG00000141854	1.882163287	up	0.000426895	0.002695732	MISP3
ENSG00000141905.19_7	5009	2171	3732	1322	1962	1933	29.088642	25.568499	28.891426	9.244083	13.926522	14.937108	ENSG00000141905	-1.31081729	down	1.05E-13	3.13E-12	NFIC
ENSG00000141994.16_8	43	7	27	58	79	119	0.182831	0.320202	0.297719	0.352428	0.560663	0.687348	ENSG00000141994	1.555018023	up	0.012164918	0.046638443	DUS3L
ENSG00000142089.16_8	1152693	499548	779241	367772	277105	323492	18980.9707	17772.45117	17171.78125	7350.037598	5497.867188	6731.58252	ENSG00000142089	-1.541847123	down	1.28E-15	4.58E-14	IFITM3
ENSG00000142156.15_4	11759	7311	11231	4533	4605	5825	49.072861	66.369743	63.290089	23.163874	22.884266	31.113729	ENSG00000142156	-1.291760671	down	9.19E-18	3.88E-16	COL6A1
ENSG00000142227.11_5	14898	10868	13723	7914	6709	5220	230.219513	362.402527	283.955627	148.078186	124.805214	101.878059	ENSG00000142227	-1.264366417	down	1.32E-09	2.36E-08	EMP3
ENSG00000142230.13_6	11992	5500	8161	25944	31138	26721	52.24548	48.34404	45.569363	141.664429	166.949814	141.640671	ENSG00000142230	1.467554485	up	1.77E-19	8.72E-18	SAE1
ENSG00000142252.11_5	2621	967	1987	4050	5110	4282	21.999208	19.237423	22.602221	38.922298	48.798733	45.378689	ENSG00000142252	1.057877633	up	2.59E-08	3.81E-07	GEMIN7
ENSG00000142396.10_6	6329	2937	4278	11456	12817	10262	47.503094	45.453865	40.690594	100.556259	109.199753	95.997032	ENSG00000142396	1.114627599	up	2.82E-10	5.52E-09	ERVK3-1
ENSG00000142408.5_7	128	90	150	67	9	12	0.146647	0.22114	0.230215	0.092952	0.012382	0.01707	ENSG00000142408	-2.231111849	down	0.000948426	0.005395902	CACNG8
ENSG00000142507.10_4	132972	52281	96914	273124	288088	207396	1628.907471	1386.043823	1590.214111	4068.041504	4257.269043	3211.252441	ENSG00000142507	1.242019645	up	2.67E-10	5.27E-09	PSMB6
ENSG00000142528.16_7	148	173	214	421	541	587	0.715344	0.940773	0.861314	1.251127	1.867928	2.017558	ENSG00000142528	1.185952831	up	6.14E-05	0.000476252	ZNF473
ENSG00000142541.17_5	60455	24844	37039	102765	95741	91568	650.679565	507.731873	469.114075	1171.837524	1259.65564	1255.98938	ENSG00000142541	1.029722884	up	3.69E-08	5.32E-07	RPL13A
ENSG00000142546.14_8	43943	18189	29013	17593	17926	15804	363.877808	323.708923	319.936493	176.478485	177.861786	161.683578	ENSG00000142546	-1.046222763	down	5.60E-09	9.05E-08	NOSIP
ENSG00000142583.18_6	39	40	54	8	10	0	0.092187	0.252714	0.215212	0.021752	0.028411	0	ENSG00000142583	-3.1766625	down	0.000637654	0.003830953	SLC2A5
ENSG00000142611.17_5	56	68	74	201	174	198	0.191138	0.185397	0.147093	0.4759	0.724031	0.373323	ENSG00000142611	1.198148564	up	0.003235561	0.015444979	PRDM16
ENSG00000142619.4_3	205	82	100	32	22	28	0.645372	0.551903	0.417666	0.121251	0.080543	0.10836	ENSG00000142619	-2.454490651	down	5.95E-07	7.08E-06	PADI3
ENSG00000142627.13_5	978	583	931	2747	3642	3556	2.5101	3.198868	3.170453	8.493171	11.183961	11.450252	ENSG00000142627	1.722467461	up	1.26E-27	1.12E-25	EPHA2
ENSG00000142677.4_5	103	61	49	20	0	4	0.367156	0.463526	0.230362	0.084403	0	0.018048	ENSG00000142677	-3.327830144	down	0.000210225	0.001439618	IL22RA1
ENSG00000142784.16_5	172	134	138	54	44	107	0.364628	0.58999	0.359837	0.126203	0.102279	0.287165	ENSG00000142784	-1.442938395	down	0.001040701	0.005828981	WDTC1
ENSG00000142937.12_4	18580	7349	13774	47318	52012	50633	240.383545	204.83847	238.011765	740.035706	808.526123	826.182068	ENSG00000142937	1.700794494	up	1.90E-24	1.37E-22	RPS8
ENSG00000142949.17_5	796	382	729	1488	1831	1918	1.205649	1.251596	1.352307	2.425209	3.143611	3.687171	ENSG00000142949	1.211577568	up	1.68E-11	3.87E-10	PTPRF
ENSG00000143028.9_4	50	36	48	8	18	19	0.134075	0.202501	0.171757	0.02549	0.056835	0.061877	ENSG00000143028	-1.8969997	down	0.006872876	0.029157844	SYPL2
ENSG00000143033.18_4	5355	3074	5143	2289	3089	2671	21.94075	34.045391	48.569866	8.945564	19.678932	10.850433	ENSG00000143033	-1.019530549	down	1.51E-11	3.48E-10	MTF2
ENSG00000143093.15_5	166	79	248	325	510	478	0.524463	0.485383	0.834201	0.864986	1.584022	1.854917	ENSG00000143093	1.175005749	up	0.000207107	0.00141909	STRIP1
ENSG00000143126.8_4	715	459	603	207	236	348	0.679671	1.014411	0.767169	0.25435	0.258923	0.41239	ENSG00000143126	-1.463086659	down	3.00E-09	5.05E-08	CELSR2
ENSG00000143127.13_4	41	35	25	9	14	2	0.129883	0.212856	0.111374	0.019478	0.031761	0.0037	ENSG00000143127	-2.339893022	down	0.009853545	0.039216479	ITGA10
ENSG00000143226.14_6	97	43	48	19	17	9	0.858738	0.749567	0.265247	0.13792	0.08458	0.041009	ENSG00000143226	-2.283017653	down	0.000576949	0.003502798	FCGR2A
ENSG00000143256.5_5	7359	3440	5812	64768	61090	47060	124.551384	126.033371	132.230698	1331.672485	1249.718994	1007.943604	ENSG00000143256	3.160731265	up	2.35E-62	7.01E-60	PFDN2
ENSG00000143314.12_6	5116	2508	3723	28601	26816	22728	58.36401	61.803162	56.813492	395.717285	368.498444	328.004761	ENSG00000143314	2.552329068	up	4.63E-45	8.15E-43	MRPL24
ENSG00000143318.13_4	26	20	49	94	116	156	0.137219	0.227087	0.349036	0.607588	0.748268	1.050153	ENSG00000143318	1.66657984	up	0.000948197	0.005395898	CASQ1
ENSG00000143320.9_5	351	144	284	45	35	46	3.62157	3.195467	3.844969	0.523351	0.408412	0.591947	ENSG00000143320	-2.842255496	down	6.74E-15	2.29E-13	CRABP2
ENSG00000143333.7_5	814	515	710	4497	4273	3850	3.399536	4.637437	3.963154	22.793997	21.511532	20.321947	ENSG00000143333	2.366289229	up	3.68E-38	5.00E-36	RGS16
ENSG00000143341.12_4	402	276	397	34	96	123	0.219727	0.325331	0.305224	0.022239	0.063327	0.321609	ENSG00000143341	-2.41675991	down	5.19E-11	1.12E-09	HMCN1
ENSG00000143344.15_4	288	158	370	86	131	196	0.567996	0.668914	1.001355	0.205052	0.309309	0.487093	ENSG00000143344	-1.251907017	down	0.000291127	0.001917425	RGL1
ENSG00000143353.12_4	492	173	369	1907	1786	1603	2.648252	2.062173	2.861349	12.681862	11.788082	11.151095	ENSG00000143353	2.162582655	up	1.30E-20	7.10E-19	LYPLAL1
ENSG00000143365.19_7	55	18	70	0	11	19	0.178099	0.126993	0.304063	0	0.0418	0.078552	ENSG00000143365	-2.518677658	down	0.007783584	0.0323414	RORC
ENSG00000143367.16_6	254	118	304	775	1214	918	0.839181	0.835574	1.751145	3.114244	4.79848	3.907581	ENSG00000143367	1.866514887	up	1.34E-13	3.98E-12	TUFT1
ENSG00000143369.15_5	3014	1771	2888	382	613	416	14.745383	18.731813	18.82745	2.380432	3.589276	2.196342	ENSG00000143369	-2.714872154	down	6.34E-45	1.11E-42	ECM1
ENSG00000143373.18_4	209	115	74	17	60	53	0.5378	0.462065	0.184946	0.036645	0.399108	0.204994	ENSG00000143373	-1.948065602	down	0.000263037	0.001750984	ZNF687
ENSG00000143409.15_8	698	296	489	224	227	280	3.343793	2.884439	2.468033	1.067021	1.074395	1.259593	ENSG00000143409	-1.253276998	down	7.72E-07	8.96E-06	MINDY1
ENSG00000143412.10_4	107	46	104	13	41	25	0.704211	0.635982	0.927641	0.09947	0.320369	0.196538	ENSG00000143412	-1.958579163	down	0.000579801	0.003519209	ANXA9
ENSG00000143416.21_8	29	21	79	5	7	14	0.137499	0.19103	0.484439	0.026389	0.029255	0.124118	ENSG00000143416	-2.575179585	down	0.002106505	0.010723325	SELENBP1
ENSG00000143442.22_9	1298	705	831	470	476	519	4.491705	4.876516	4.066266	1.512776	1.584377	1.84571	ENSG00000143442	-1.217174648	down	1.62E-08	2.45E-07	POGZ
ENSG00000143443.10_4	662	200	449	1737	1588	1133	3.529044	2.436577	3.880023	10.738225	9.703284	7.312887	ENSG00000143443	1.597457426	up	4.73E-09	7.71E-08	C1orf56
ENSG00000143469.20_7	124	119	339	751	977	832	0.091462	0.256445	0.48199	0.844352	1.038512	0.779423	ENSG00000143469	1.867236011	up	1.21E-08	1.88E-07	SYT14
ENSG00000143473.13_8	16	22	13	126	51	122	0.018985	0.057371	0.021065	0.416468	0.208072	0.285427	ENSG00000143473	2.194252038	up	0.000585179	0.003546378	KCNH1
ENSG00000143479.17_6	112	42	102	126	349	283	0.138298	0.412867	0.225551	0.702995	0.759111	0.664639	ENSG00000143479	1.314221832	up	0.001063172	0.005942736	DYRK3
ENSG00000143512.13_5	137	97	151	38	31	11	0.618761	0.813752	0.857329	0.225605	0.141595	0.051199	ENSG00000143512	-2.509041053	down	2.54E-06	2.66E-05	HHIPL2
ENSG00000143520.6_8	34	61	52	4	8	28	0.036625	0.144318	0.076058	0.004566	0.009779	0.038747	ENSG00000143520	-2.340491401	down	0.003819621	0.017776451	FLG2
ENSG00000143549.21_8	31805	20702	21300	11985	15875	14893	108.684715	153.71875	98.977699	58.421684	77.048378	88.200661	ENSG00000143549	-1.090675237	down	3.10E-10	6.04E-09	TPM3
ENSG00000143553.11_4	8730	3625	2415	1419	1366	1411	86.67672	81.513412	32.874474	18.260015	16.358999	17.742422	ENSG00000143553	-2.056424936	down	2.19E-05	0.000187558	SNAPIN
ENSG00000143554.14_8	125	58	111	43	25	33	0.692011	0.781782	0.852975	0.540933	0.409752	0.355936	ENSG00000143554	-1.750408881	down	0.000571901	0.003476623	SLC27A3
ENSG00000143575.15_8	2680	1146	2000	10382	11017	8926	25.129505	22.444967	23.683178	120.566238	125.14933	101.364655	ENSG00000143575	2.16097355	up	1.56E-32	1.70E-30	HAX1
ENSG00000143603.19_7	102	56	113	35	48	10	0.078565	0.093064	0.116296	0.03187	0.044493	0.009125	ENSG00000143603	-1.770376234	down	0.003370522	0.015963317	KCNN3
ENSG00000143612.20_5	4983	2051	3070	8318	10466	8796	31.979843	28.20388	27.686134	61.417259	88.507782	68.402634	ENSG00000143612	1.217885665	up	2.07E-11	4.68E-10	C1orf43
ENSG00000143631.11_4	113	53	113	0	15	62	0.088486	0.088535	0.118565	0	0.013665	0.060918	ENSG00000143631	-2.178556225	down	0.009801945	0.039049483	FLG
ENSG00000143653.10_4	151	126	224	318	362	597	0.707141	1.276016	1.403726	1.807394	2.046099	3.54292	ENSG00000143653	1.04380638	up	0.000916527	0.00525112	SCCPDH
ENSG00000143702.16_7	461	356	524	118	338	386	0.735259	1.764734	1.297424	0.318933	1.135993	0.864616	ENSG00000143702	-1.012560771	down	0.002484417	0.01236968	CEP170
ENSG00000143727.16_4	4975	2645	4002	9206	10170	9310	40.775635	48.530113	42.743408	101.46151	102.645973	95.537621	ENSG00000143727	1.051146457	up	2.49E-12	6.29E-11	ACP1
ENSG00000143771.12_5	10499	4341	7570	30281	29129	19093	57.517708	51.656025	56.504414	193.317551	162.963776	117.326805	ENSG00000143771	1.606663843	up	1.43E-13	4.22E-12	CNIH4
ENSG00000143786.8_5	338	207	404	123	163	158	2.625926	3.255186	3.517503	1.661229	1.580445	1.782716	ENSG00000143786	-1.362655176	down	1.93E-06	2.06E-05	CNIH3
ENSG00000143799.13_5	7918	3208	6017	2265	3395	3277	20.064526	17.794165	20.469887	7.256624	10.378141	10.61892	ENSG00000143799	-1.176399296	down	3.31E-11	7.33E-10	PARP1
ENSG00000143847.15_4	350	238	378	64	111	49	0.565187	0.810971	1.007801	0.118792	0.294314	0.258182	ENSG00000143847	-2.389856464	down	1.19E-11	2.78E-10	PPFIA4
ENSG00000143924.19_4	842	514	928	370	455	495	4.181314	3.009537	6.647157	0.86098	1.1874	1.57445	ENSG00000143924	-1.060874587	down	2.95E-07	3.69E-06	EML4
ENSG00000143933.18_7	337680	138210	201244	560778	576868	525724	2810.782471	2477.580811	2233.03833	5648.207031	5796.236328	5532.148438	ENSG00000143933	1.075904883	up	4.34E-09	7.11E-08	CALM2
ENSG00000144029.12_6	2416	1048	2109	5558	6346	5695	8.641694	7.248981	12.106837	21.708101	24.197727	27.940571	ENSG00000144029	1.435080059	up	3.20E-17	1.29E-15	MRPS5
ENSG00000144233.10_4	33	23	68	153	296	350	0.070733	0.105023	0.193238	0.397832	0.762294	0.947864	ENSG00000144233	2.404634491	up	3.01E-08	4.39E-07	AMMECR1L
ENSG00000144285.21_10	37	10	27	0	0	0	0.039666	0.016604	0.027764	0	0	0	ENSG00000144285	-7.245567287	down	1.17E-05	0.000105995	SCN1A
ENSG00000144354.14_5	1283	644	1170	330	365	412	5.035576	5.478351	6.212763	1.448017	1.64261	2.001201	ENSG00000144354	-1.731514201	down	1.97E-18	8.86E-17	CDCA7
ENSG00000144381.17_6	21334	9681	12609	29582	42976	42769	100.198196	98.049835	79.309456	170.9646	253.364349	258.107147	ENSG00000144381	1.143518126	up	1.21E-10	2.51E-09	HSPD1
ENSG00000144401.14_4	144	179	216	462	427	548	1.188856	2.694232	2.627618	4.213067	3.966886	4.714926	ENSG00000144401	1.072599677	up	0.000579989	0.003519444	METTL21A
ENSG00000144452.15_6	27	15	10	0	0	0	0.028307	0.034128	0.013831	0	0	0	ENSG00000144452	-6.845522747	down	0.000117628	0.0008591	ABCA12
ENSG00000144468.17_8	198	115	210	380	456	461	0.439603	0.750167	0.647914	1.165933	1.217247	1.301406	ENSG00000144468	1.048298316	up	5.00E-05	0.000394808	RHBDD1
ENSG00000144485.11_7	35	12	77	177	204	304	0.257312	0.156886	0.643907	1.659944	1.799583	2.413863	ENSG00000144485	2.260017097	up	3.63E-06	3.70E-05	HES6
ENSG00000144583.5_5	0	0	0	18	13	27	0	0	0	0.043515	0.031023	0.069235	ENSG00000144583	6.411580343	up	0.000399594	0.002547238	MARCHF4
ENSG00000144596.13_6	19	38	21	0	0	0	0.02321	0.154866	0.066019	0	0	0	ENSG00000144596	-7.593597217	down	1.93E-06	2.06E-05	GRIP2
ENSG00000144597.14_4	2172	1573	2881	8583	10154	8203	4.912391	7.673322	8.712912	23.556702	27.676252	23.440681	ENSG00000144597	1.75147174	up	8.29E-22	4.92E-20	EAF1
ENSG00000144619.15_5	9	0	21	118	145	160	0.016723	0	0.070392	0.286918	0.332887	0.402249	ENSG00000144619	3.654879293	up	5.19E-08	7.31E-07	CNTN4
ENSG00000144681.10_5	381	107	381	657	795	941	1.601248	0.700527	1.581595	2.858799	2.984148	3.937926	ENSG00000144681	1.270988914	up	1.07E-05	9.88E-05	STAC
ENSG00000144711.16_8	395	300	477	114	75	234	0.515826	0.94384	0.831872	0.179604	0.117733	0.385562	ENSG00000144711	-1.772624151	down	1.36E-06	1.51E-05	IQSEC1
ENSG00000144713.13_5	11898	5066	7864	24437	23259	18065	61.483158	55.532505	58.758526	144.878418	138.148239	112.124931	ENSG00000144713	1.192234602	up	2.17E-09	3.71E-08	RPL32
ENSG00000144747.17_7	1780	907	1389	481	900	1032	2.768911	3.162817	3.575023	0.954666	1.963592	2.520163	ENSG00000144747	-1.038819144	down	3.98E-06	4.02E-05	TMF1
ENSG00000144810.16_6	3736	1890	2379	879	1108	1030	8.142615	10.397746	6.705519	2.388902	2.623687	2.519279	ENSG00000144810	-1.670094106	down	5.43E-20	2.84E-18	COL8A1
ENSG00000144840.10_6	990	508	825	1991	2362	1760	3.067922	3.243272	3.265684	12.732959	11.725667	9.075682	ENSG00000144840	1.151398914	up	2.05E-09	3.52E-08	RABL3
ENSG00000144857.14_8	416	241	325	120	134	201	1.24566	1.36313	1.273797	0.431928	0.349071	0.708875	ENSG00000144857	-1.39275194	down	2.07E-06	2.20E-05	BOC
ENSG00000144868.13_6	110	59	142	27	49	44	0.516209	0.30959	0.798474	0.075782	0.345287	0.134252	ENSG00000144868	-1.633367352	down	0.000701872	0.004164294	TMEM108
ENSG00000144959.11_7	676	553	699	263	381	427	1.675887	2.704182	2.073659	0.707592	1.017586	1.194137	ENSG00000144959	-1.173237024	down	8.60E-07	9.92E-06	NCEH1
ENSG00000145012.13_7	2793	1447	2531	908	1428	1592	2.056616	3.285694	4.114359	1.17519	2.000505	1.965233	ENSG00000145012	-1.055506648	down	1.26E-08	1.95E-07	LPP
ENSG00000145075.13_8	66	10	28	8	0	7	0.147123	0.047484	0.082729	0.019817	0	0.019797	ENSG00000145075	-2.880517139	down	0.008705437	0.035466319	NA
ENSG00000145107.16_6	157	65	206	431	431	397	1.28592	1.239301	2.538798	4.849331	4.881597	4.459231	ENSG00000145107	1.353217435	up	2.16E-05	0.000185354	TM4SF19
ENSG00000145147.20_9	4692	2684	4197	1880	1904	1862	6.01046	7.446989	7.210268	2.860646	2.866222	2.949621	ENSG00000145147	-1.290930528	down	3.13E-16	1.18E-14	SLIT2
ENSG00000145247.12_8	55922	19905	37635	140985	126870	111741	540.510864	416.910706	480.421692	1596.521118	1441.55188	1359.632446	ENSG00000145247	1.552846564	up	2.29E-14	7.34E-13	OCIAD2
ENSG00000145287.10_4	8	0	4	68	79	65	0.053492	0	0.018708	0.843626	1.073438	0.88426	ENSG00000145287	3.998343916	up	1.80E-06	1.94E-05	PLAC8
ENSG00000145349.17_8	776	628	812	339	439	553	2.193734	3.829163	3.217919	0.793053	0.937942	1.272016	ENSG00000145349	-1.056432355	down	4.27E-06	4.29E-05	CAMK2D
ENSG00000145358.6_7	72	96	113	3	24	11	0.324955	0.795645	0.617517	0.013442	0.123987	0.052327	ENSG00000145358	-3.291250096	down	6.99E-07	8.20E-06	DDIT4L
ENSG00000145416.13_7	51	7	56	59	201	138	0.088553	0.117078	0.221475	0.19187	1.400763	0.545621	ENSG00000145416	1.619604807	up	0.007350629	0.030857477	MARCHF1
ENSG00000145425.10_6	12108	5174	7046	20716	23797	23437	140.020905	128.976547	109.838844	292.821106	338.130798	344.970154	ENSG00000145425	1.244823154	up	1.90E-12	4.87E-11	RPS3A
ENSG00000145675.15_4	291	207	317	54	97	107	0.469077	0.81493	1.159336	0.12268	0.270386	0.194413	ENSG00000145675	-1.968279227	down	3.17E-09	5.32E-08	PIK3R1
ENSG00000145685.14_7	113	122	235	279	450	532	0.265334	0.554664	0.661877	0.735112	1.234208	1.430554	ENSG00000145685	1.09846571	up	0.001337736	0.007269164	LHFPL2
ENSG00000145703.16_6	136	73	134	21	57	95	0.311073	0.333605	0.396133	0.078245	0.178652	0.206116	ENSG00000145703	-1.288855417	down	0.011842963	0.045641328	IQGAP2
ENSG00000145743.17_5	82	43	155	33	23	54	0.417186	0.179073	1.369185	0.418867	0.053145	0.1875	ENSG00000145743	-1.573167169	down	0.005423248	0.023865731	FBXL17
ENSG00000145817.17_5	3194	2590	3567	1564	1919	2254	11.270703	18.194954	15.58713	7.143796	8.566202	9.404739	ENSG00000145817	-1.018462556	down	1.32E-08	2.03E-07	YIPF5
ENSG00000145819.18_8	376	151	369	726	998	739	1.241554	0.543104	1.338393	2.917153	2.809616	2.681605	ENSG00000145819	1.239442629	up	6.29E-07	7.44E-06	ARHGAP26
ENSG00000145824.13_5	342	134	342	20	23	97	1.948742	1.602509	2.613402	0.123851	0.13624	0.67497	ENSG00000145824	-2.80433537	down	1.50E-08	2.28E-07	CXCL14
ENSG00000145919.11_7	104	97	199	349	308	361	0.544163	1.104375	1.870888	2.336715	1.949114	2.466751	ENSG00000145919	1.070209619	up	0.00161614	0.008540178	BOD1
ENSG00000146006.8_5	80	61	61	26	12	26	0.132555	0.217955	0.133219	0.050776	0.023082	0.052486	ENSG00000146006	-1.949536225	down	0.001430871	0.007700799	LRRTM2
ENSG00000146072.6_4	176	385	366	126	112	186	0.491663	2.320139	1.367586	0.427288	0.375669	0.657537	ENSG00000146072	-1.54796339	down	0.000178263	0.001243102	TNFRSF21
ENSG00000146083.12_5	92	50	106	273	358	543	0.223644	0.258619	0.341419	0.805448	1.050486	1.674363	ENSG00000146083	1.972813739	up	2.09E-09	3.59E-08	RNF44
ENSG00000146122.17_4	178	110	176	107	68	90	0.31928	0.406129	0.520694	0.306051	0.225291	0.27897	ENSG00000146122	-1.053667781	down	0.006833365	0.029029495	DAAM2
ENSG00000146242.9_3	423	185	385	822	1037	1466	1.252373	1.180716	1.523978	3.468158	3.703931	6.445587	ENSG00000146242	1.4965481	up	1.90E-10	3.81E-09	TPBG
ENSG00000146250.7_4	663	426	614	59	64	44	2.725763	3.778622	3.377334	0.293984	0.313631	0.22391	ENSG00000146250	-3.618578774	down	2.02E-37	2.66E-35	PRSS35
ENSG00000146373.16_7	418	320	408	168	164	254	1.377942	2.286366	1.613631	0.476111	0.42126	0.959738	ENSG00000146373	-1.275467404	down	6.06E-06	5.89E-05	RNF217
ENSG00000146374.14_5	36	43	66	0	0	2	0.074916	0.189408	0.183571	0	0	0.005244	ENSG00000146374	-6.531265666	down	5.07E-07	6.09E-06	RSPO3
ENSG00000146376.11_5	2435	1144	2115	587	1042	1033	5.548279	5.663354	6.653077	1.622348	2.950033	3.060808	ENSG00000146376	-1.357765575	down	1.87E-11	4.27E-10	ARHGAP18
ENSG00000146411.6_5	700	436	526	24	29	56	1.262766	1.695691	1.268022	0.052485	0.061962	0.126058	ENSG00000146411	-4.233135293	down	1.49E-39	2.18E-37	SLC2A12
ENSG00000146469.13_4	4	4	0	92	46	111	0.025455	0.054755	0	0.705035	0.348295	0.890498	ENSG00000146469	4.63123263	up	1.29E-07	1.71E-06	VIP
ENSG00000146530.14_8	140	129	251	68	70	78	0.328749	0.721693	0.676774	0.139245	0.139145	0.174248	ENSG00000146530	-1.556524845	down	8.81E-05	0.000659204	VWDE
ENSG00000146592.17_5	1529	1071	1442	431	993	644	5.117075	4.890852	4.693223	2.132293	3.593572	3.639281	ENSG00000146592	-1.282597244	down	1.08E-07	1.44E-06	CREB5
ENSG00000146674.15_9	1285	900	1071	384	324	479	5.589071	8.374628	6.211551	1.786059	1.499317	2.307209	ENSG00000146674	-1.749038682	down	6.83E-15	2.32E-13	IGFBP3
ENSG00000146733.14_5	5009	3140	4632	9844	16326	11004	25.382669	32.601818	30.28091	67.163002	109.635109	77.60199	ENSG00000146733	1.255330541	up	1.47E-12	3.79E-11	PSPH
ENSG00000146938.16_8	477	300	401	45	122	115	0.816861	1.139546	0.919161	0.093537	0.288976	0.248102	ENSG00000146938	-2.378720368	down	9.79E-13	2.57E-11	NLGN4X
ENSG00000146950.13_4	141	118	154	48	73	59	0.275637	0.342672	0.333296	0.077168	0.117999	0.099454	ENSG00000146950	-1.514836348	down	0.000186515	0.001294146	SHROOM2
ENSG00000147003.7_7	13	0	7	57	46	43	0.077665	0	0.057758	0.509044	0.407796	0.346669	ENSG00000147003	2.784344803	up	0.002593636	0.012821525	CLTRN
ENSG00000147162.14_4	1124	778	1272	2713	3638	4405	1.997427	2.766991	2.964023	6.030195	8.083868	10.229837	ENSG00000147162	1.466211647	up	4.71E-16	1.75E-14	OGT
ENSG00000147231.14_6	178	164	193	70	121	110	0.49928	1.24944	0.722947	0.236688	0.379266	0.358581	ENSG00000147231	-1.171210002	down	0.001377091	0.007450431	RADX
ENSG00000147255.19_9	229	65	180	31	76	68	0.685787	0.26016	0.498332	0.068136	0.244284	0.196093	ENSG00000147255	-1.654476518	down	0.000286734	0.001893418	IGSF1
ENSG00000147364.17_5	387	162	401	880	1009	1004	0.540434	0.705609	1.063721	3.291264	1.305441	4.153863	ENSG00000147364	1.385327507	up	1.62E-09	2.85E-08	FBXO25
ENSG00000147408.14_5	124	63	138	42	57	23	0.292576	0.321815	0.503014	0.119901	0.162369	0.066156	ENSG00000147408	-1.640787763	down	0.001178994	0.006511498	CSGALNACT1
ENSG00000147416.11_7	1839	1047	1687	3991	4905	3885	6.741787	8.675834	7.968398	17.06296	21.090523	17.642759	ENSG00000147416	1.224219893	up	1.11E-13	3.30E-12	ATP6V1B2
ENSG00000147421.18_6	117	78	151	356	330	429	0.477404	1.533664	1.135325	2.676914	2.57127	3.507199	ENSG00000147421	1.424283679	up	2.48E-06	2.60E-05	HMBOX1
ENSG00000147454.14_4	4297	1787	3129	12431	10637	10865	12.68729	10.995859	11.934379	44.831608	39.788265	40.05806	ENSG00000147454	1.671195205	up	6.10E-19	2.88E-17	SLC25A37
ENSG00000147509.14_5	33	31	55	223	167	134	0.399	0.632437	0.828932	2.941322	2.634465	1.73078	ENSG00000147509	1.877180891	up	4.69E-05	0.000371444	RGS20
ENSG00000147604.14_5	114173	56000	77222	312346	315390	307939	931.857483	986.282959	842.821899	3092.64209	3101.734863	3174.793457	ENSG00000147604	1.675562338	up	3.68E-25	2.77E-23	RPL7
ENSG00000147642.17_9	47	8	43	158	177	168	0.13396	0.048296	0.166307	0.656444	0.71911	0.826399	ENSG00000147642	2.199598367	up	8.69E-06	8.14E-05	SYBU
ENSG00000147687.19_6	477	306	596	1643	1641	1778	4.978118	7.148338	8.341674	20.95787	21.094879	24.201775	ENSG00000147687	1.617801799	up	7.50E-16	2.72E-14	TATDN1
ENSG00000147852.16_4	383	187	385	625	1031	1420	0.419121	0.439519	0.697951	1.761332	2.718463	2.337379	ENSG00000147852	1.418780714	up	4.12E-08	5.89E-07	VLDLR
ENSG00000147854.17_7	213	89	186	362	435	557	0.594764	0.541824	0.695126	1.477151	1.769248	2.149376	ENSG00000147854	1.233893161	up	9.06E-06	8.45E-05	UHRF2
ENSG00000147996.12	5394	3119	4469	10410	14122	10025	41.33329	45.773632	46.645359	93.676765	130.153885	91.056099	ENSG00000147996	1.144565958	up	8.88E-12	2.11E-10	CBWD5
ENSG00000148053.16_4	902	401	711	141	68	70	1.352784	1.175271	1.294548	0.213569	0.105681	0.123788	ENSG00000148053	-3.036706891	down	1.68E-19	8.32E-18	NTRK2
ENSG00000148082.10_6	36	22	36	0	0	0	0.036519	0.04706	0.049284	0	0	0	ENSG00000148082	-7.677633005	down	5.46E-07	6.54E-06	SHC3
ENSG00000148143.13_9	2974	1734	2541	658	818	945	2.891316	4.038131	3.319516	0.804558	1.012804	1.250979	ENSG00000148143	-1.859772314	down	4.81E-29	4.63E-27	ZNF462
ENSG00000148154.10_4	431	346	662	880	1343	1350	1.095018	2.213509	2.412333	2.735636	4.12452	4.382833	ENSG00000148154	1.013661113	up	1.63E-05	0.000143546	UGCG
ENSG00000148180.19_6	16943	7658	10990	1756	1965	2308	67.645561	65.91478	57.906403	7.939014	8.808174	11.258026	ENSG00000148180	-2.807703416	down	3.83E-62	1.13E-59	GSN
ENSG00000148200.17_6	412	319	344	1300	1518	979	0.590405	0.979833	0.65352	2.244982	2.606743	1.760724	ENSG00000148200	1.522206973	up	6.91E-10	1.29E-08	NR6A1
ENSG00000148290.10_6	258	154	202	584	583	757	2.500303	3.310164	2.668591	7.159485	7.151764	8.863034	ENSG00000148290	1.372555724	up	1.47E-08	2.23E-07	SURF1
ENSG00000148300.12_5	510	220	410	844	947	1001	2.205129	2.044469	2.367473	4.425427	4.934086	5.480538	ENSG00000148300	1.059602795	up	5.43E-07	6.50E-06	REXO4
ENSG00000148335.14_3	7304	3260	5469	12967	15575	11711	73.716988	72.652328	71.752151	160.305649	186.973297	145.761093	ENSG00000148335	1.098594021	up	3.19E-10	6.20E-09	NTMT1
ENSG00000148344.11_5	916	475	574	20	41	90	5.225819	5.798365	4.40905	0.128589	0.262454	0.648286	ENSG00000148344	-4.008464634	down	1.04E-27	9.38E-26	PTGES
ENSG00000148346.12_4	16	9	4	823	460	614	0.188508	0.20386	0.052878	12.261869	6.941695	9.506416	ENSG00000148346	5.789361924	up	4.67E-39	6.64E-37	LCN2
ENSG00000148399.13_6	265	176	278	411	607	909	1.600709	2.147667	1.971045	2.777007	3.780401	5.967925	ENSG00000148399	1.118602718	up	4.70E-05	0.000372024	DPH7
ENSG00000148513.18_5	2768	1788	2510	128	198	155	5.690388	7.933069	6.971255	0.338011	0.490927	0.402277	ENSG00000148513	-4.165791018	down	3.54E-104	3.49E-101	ANKRD30A
ENSG00000148541.13_10	601	375	530	129	211	238	2.528927	3.94424	2.594997	0.485413	1.027227	1.156905	ENSG00000148541	-1.679461323	down	9.33E-11	1.96E-09	FAM13C
ENSG00000148604.15_5	35	12	30	0	0	0	0.204918	0.160418	0.313965	0	0	0	ENSG00000148604	-7.324242828	down	6.58E-06	6.35E-05	RGR
ENSG00000148655.15_10	1575	851	1460	619	593	532	12.908205	16.489286	18.943304	2.621986	2.999271	4.782985	ENSG00000148655	-1.396173863	down	2.99E-12	7.51E-11	LRMDA
ENSG00000148700.15_5	1262	1127	1026	612	719	720	2.973562	6.037272	3.243958	1.980023	2.055842	2.113199	ENSG00000148700	-1.075012036	down	2.72E-06	2.83E-05	ADD3
ENSG00000148735.15_5	645	313	318	43	8	5	2.463558	2.061684	1.651572	0.231068	0.026933	0.018331	ENSG00000148735	-4.652946373	down	1.89E-06	2.02E-05	PLEKHS1
ENSG00000148842.18_4	150	91	139	135	483	453	0.139326	0.14625	0.117107	0.103146	0.369213	0.363045	ENSG00000148842	1.174933614	up	0.002445969	0.012209158	CNNM2
ENSG00000148926.10_5	6639	4541	5799	2210	2580	2381	43.897739	59.897499	51.604694	18.387583	20.898462	21.195488	ENSG00000148926	-1.533541063	down	2.27E-22	1.43E-20	ADM
ENSG00000148948.8_6	218	110	188	46	8	60	0.54066	0.780543	0.622367	0.218698	0.023525	0.186699	ENSG00000148948	-2.40596775	down	1.35E-05	0.000121304	LRRC4C
ENSG00000149100.13_5	5761	2398	3857	11534	12761	11001	18.54624	16.444422	17.815216	45.775509	45.157032	46.734348	ENSG00000149100	1.331694718	up	5.35E-14	1.66E-12	EIF3M
ENSG00000149131.16_6	495	154	414	95	57	78	2.897328	1.807577	3.215142	0.635475	0.392973	0.847783	ENSG00000149131	-2.374446742	down	8.35E-11	1.76E-09	SERPING1
ENSG00000149136.9_6	1294	615	1302	1942	3034	3345	4.426766	4.563632	6.025635	8.214199	12.854739	14.685663	ENSG00000149136	1.118899722	up	1.04E-08	1.63E-07	SSRP1
ENSG00000149150.9_8	87	45	61	504	962	721	0.347828	0.395608	0.322337	2.439422	4.783717	3.710179	ENSG00000149150	3.223248223	up	5.00E-29	4.80E-27	SLC43A1
ENSG00000149196.16_7	2216	954	1707	4138	4531	3582	20.87549	26.204964	30.012682	61.070881	74.943924	59.367382	ENSG00000149196	1.10859029	up	3.35E-09	5.58E-08	HIKESHI
ENSG00000149212.12_6	732	554	905	211	180	279	0.769704	1.256976	1.272221	0.268573	0.227903	0.370426	ENSG00000149212	-1.995506447	down	2.68E-15	9.36E-14	SESN3
ENSG00000149218.5_4	1415	815	1360	231	300	531	3.060819	3.800853	3.932913	0.606137	0.781699	1.451056	ENSG00000149218	-2.044207932	down	3.05E-16	1.15E-14	ENDOD1
ENSG00000149231.15_9	2348	1408	2001	994	1375	1038	8.102744	10.978838	9.676532	4.424189	6.170146	4.697676	ENSG00000149231	-1.031664383	down	9.27E-09	1.46E-07	CCDC82
ENSG00000149273.15_5	55910	20008	35172	112446	109020	104883	628.699463	227.833069	451.69397	1471.481689	1429.936401	1455.997925	ENSG00000149273	1.355078661	up	1.66E-12	4.26E-11	RPS3
ENSG00000149295.14_6	172	61	146	10	4	0	0.610582	0.466249	0.822729	0.039989	0.017097	0	ENSG00000149295	-4.901215965	down	6.52E-12	1.57E-10	DRD2
ENSG00000149311.18_5	528	417	723	307	353	343	0.710777	1.987736	1.755589	0.530043	1.282071	0.572095	ENSG00000149311	-1.020331815	down	2.85E-05	0.000237167	ATM
ENSG00000149483.12_4	2496	1040	1602	4101	4606	3670	17.450207	16.95752	16.76111	36.425369	39.877968	31.813202	ENSG00000149483	1.04528985	up	7.57E-08	1.04E-06	TMEM138
ENSG00000149506.11_4	389	124	210	88	130	94	1.999031	1.375462	1.445079	0.620593	0.803957	0.610858	ENSG00000149506	-1.420659435	down	9.47E-05	0.000704292	ZP1
ENSG00000149571.12_7	68	29	32	16	17	4	0.177131	0.187524	0.161708	0.050271	0.121824	0.091635	ENSG00000149571	-2.012658589	down	0.01254932	0.047793916	KIRREL3
ENSG00000149577.16_5	227	240	331	115	156	95	0.57661	1.634993	1.329489	0.374418	0.547207	0.378533	ENSG00000149577	-1.446463889	down	3.91E-05	0.000315634	SIDT2
ENSG00000149591.17_5	983	195	592	2020	2821	2240	2.772175	1.206806	2.697509	7.220932	11.236488	8.018222	ENSG00000149591	1.842907374	up	9.91E-11	2.07E-09	TAGLN
ENSG00000149596.7_4	29	60	39	129	240	316	0.063455	0.323465	0.054401	0.199889	0.409649	0.582649	ENSG00000149596	1.959021635	up	6.66E-05	0.000513208	JPH2
ENSG00000149600.11_5	488	237	485	899	1190	1551	2.560477	2.651356	3.412621	7.037294	7.555168	13.019542	ENSG00000149600	1.333046176	up	1.35E-09	2.39E-08	COMMD7
ENSG00000149609.6_4	14	31	52	0	0	4	0.058801	0.295304	0.30875	0	0	0.020301	ENSG00000149609	-5.005191343	down	8.53E-05	0.000640965	C20orf144
ENSG00000149923.14_4	45	16	50	171	118	143	0.382063	0.227733	0.527148	1.441896	1.06966	1.390192	ENSG00000149923	1.775121243	up	0.000212761	0.001455294	PPP4C
ENSG00000149925.21_8	348075	124836	194668	120307	103511	119796	2461.467285	1908.362671	1856.649902	1022.230225	872.385193	1081.319092	ENSG00000149925	-1.159813638	down	1.07E-08	1.66E-07	ALDOA
ENSG00000149948.13_8	343	243	333	163	167	178	1.071517	1.660042	1.35139	0.475115	0.619444	0.59912	ENSG00000149948	-1.141282597	down	4.10E-05	0.000330264	HMGA2
ENSG00000150048.10_7	12	12	22	0	0	4	0.042717	0.094459	0.107416	0	0	0.015591	ENSG00000150048	-3.888037093	down	0.013251503	0.04997631	CLEC1A
ENSG00000150165.13	52	11	34	0	2	2	0.262755	0.118362	0.230326	0	0.007817	0.007169	ENSG00000150165	-4.801235978	down	8.01E-05	0.000604717	NA
ENSG00000150401.15_8	209	141	267	378	513	634	0.73654	0.954677	1.128754	1.515343	2.355366	2.634718	ENSG00000150401	1.020037995	up	0.000146767	0.001044218	DCUN1D2
ENSG00000150471.16_5	193	79	168	24	28	36	0.281718	0.321468	0.277549	0.02268	0.026442	0.068622	ENSG00000150471	-2.552561835	down	8.00E-09	1.27E-07	ADGRL3
ENSG00000150527.17_7	193	76	166	335	495	491	0.59041	0.619419	0.673962	1.383641	1.867744	1.836477	ENSG00000150527	1.366875481	up	1.56E-06	1.70E-05	MIA2
ENSG00000150551.11_5	151	22	92	134	262	277	0.438732	0.13309	0.355478	0.472809	1.080625	1.121975	ENSG00000150551	1.177435551	up	0.011180332	0.043571361	LYPD1
ENSG00000150625.16_7	443	315	414	112	82	101	1.668903	2.394126	1.996596	0.474202	0.346213	0.446951	ENSG00000150625	-2.265971489	down	4.17E-14	1.31E-12	GPM6A
ENSG00000150636.17_5	141	87	127	29	22	33	0.741067	1.102195	1.03226	0.286361	0.254669	0.452585	ENSG00000150636	-2.345677151	down	5.34E-07	6.40E-06	CCDC102B
ENSG00000150687.12_6	110663	44088	69544	27172	25145	31878	499.285828	260.711487	306.467346	92.386261	107.017738	143.785583	ENSG00000150687	-1.634455891	down	2.92E-19	1.41E-17	PRSS23
ENSG00000150753.12_7	12050	5307	8753	28021	40935	34275	37.008728	35.283039	36.06271	104.61158	151.684006	133.176346	ENSG00000150753	1.739831476	up	1.43E-26	1.18E-24	CCT5
ENSG00000150787.8_5	2134	1100	2194	5032	5150	5303	24.86891	27.715984	34.534546	71.381874	75.948608	78.536957	ENSG00000150787	1.274600447	up	1.01E-14	3.35E-13	PTS
ENSG00000150867.14_8	2440	1301	2154	13811	15970	12746	6.425595	7.393932	7.687665	44.172108	50.808815	42.479164	ENSG00000150867	2.603300735	up	1.38E-59	3.86E-57	PIP4K2A
ENSG00000150907.10_7	109	84	184	37	18	76	0.25908	0.671299	0.428227	0.076408	0.037399	0.165833	ENSG00000150907	-1.806289326	down	0.000850339	0.004922083	FOXO1
ENSG00000150961.15_6	304	280	497	97	129	175	0.963353	1.68056	1.844019	0.290787	0.412255	0.569204	ENSG00000150961	-1.745801622	down	6.11E-08	8.52E-07	SEC24D
ENSG00000150977.10_3	87	30	64	127	174	193	0.140992	0.105702	0.139347	0.252047	0.342607	0.398286	ENSG00000150977	1.222476466	up	0.002794557	0.013640511	RILPL2
ENSG00000150995.19_8	877	754	730	251	278	417	1.669166	4.650495	1.985722	0.946247	0.616664	1.3046	ENSG00000150995	-1.661424281	down	1.65E-10	3.35E-09	ITPR1
ENSG00000151012.13_5	276	182	288	588	798	1064	0.287461	0.408396	0.400676	0.742893	1.002401	1.401028	ENSG00000151012	1.420864927	up	3.57E-09	5.93E-08	SLC7A11
ENSG00000151131.11_7	1885	736	1329	5791	5432	3617	3.580493	2.065199	2.626702	17.500355	11.641033	37.63364	ENSG00000151131	1.714680855	up	1.60E-13	4.68E-12	C12orf45
ENSG00000151136.15_5	94	73	283	37	39	84	0.164358	0.275063	0.66207	0.095924	0.082256	0.185078	ENSG00000151136	-1.75086457	down	0.00094143	0.005365153	BTBD11
ENSG00000151150.22_7	95	35	120	0	29	37	0.098965	0.067734	0.248759	0	0.041856	0.080939	ENSG00000151150	-2.201550047	down	0.007656067	0.031931462	ANK3
ENSG00000151176.8_4	2725	1575	2446	794	978	1078	5.891265	7.200693	6.92591	2.123205	2.581812	3.055779	ENSG00000151176	-1.515254337	down	5.59E-21	3.16E-19	PLBD2
ENSG00000151224.13_7	11	7	13	0	0	0	0.03092	0.043463	0.048127	0	0	0	ENSG00000151224	-6.074783077	down	0.003276793	0.015616534	MAT1A
ENSG00000151287.17_5	3672	1659	2848	8636	10321	8229	29.094034	28.866381	29.667892	83.80719	103.661186	84.486671	ENSG00000151287	1.501150059	up	7.32E-19	3.44E-17	TEX30
ENSG00000151327.12_6	1057	659	1063	2236	2963	2049	6.529171	9.544047	9.191106	17.202442	22.222807	16.779846	ENSG00000151327	1.115361402	up	5.77E-09	9.31E-08	FAM177A1
ENSG00000151338.18_7	218	161	233	61	75	129	0.518309	0.472689	0.494142	0.12732	0.614542	0.331056	ENSG00000151338	-1.519755094	down	3.85E-05	0.000311852	MIPOL1
ENSG00000151465.14_5	6208	2689	4420	11768	12491	10683	47.548973	44.187107	45.218098	111.283813	115.0774	103.27787	ENSG00000151465	1.168252286	up	2.29E-11	5.16E-10	CDC123
ENSG00000151474.23_8	774	484	674	239	354	468	2.231988	2.950647	2.78341	0.759392	1.392955	2.638455	ENSG00000151474	-1.164432208	down	1.56E-06	1.70E-05	FRMD4A
ENSG00000151552.12_6	559	350	500	1488	1846	1677	3.75398	5.717126	4.578949	12.63795	14.948882	14.559492	ENSG00000151552	1.553227794	up	6.84E-18	2.92E-16	QDPR
ENSG00000151575.14_7	446	297	367	155	171	249	2.468246	3.264953	2.821623	0.863644	1.028646	1.908112	ENSG00000151575	-1.248416688	down	7.20E-06	6.86E-05	TEX9
ENSG00000151632.17_6	76	68	117	21	0	25	0.202668	0.391736	0.418175	0.066985	0	0.084016	ENSG00000151632	-2.770797432	down	0.000495965	0.00307277	AKR1C2
ENSG00000151746.15_7	810	407	815	157	230	356	2.923839	3.454559	4.087893	0.542144	0.64308	1.376884	ENSG00000151746	-1.71922492	down	2.32E-10	4.61E-09	BICD1
ENSG00000151790.9_4	160	253	390	40	16	28	0.939355	3.609498	3.7819	0.282306	0.110013	0.172304	ENSG00000151790	-3.567343923	down	6.99E-14	2.14E-12	TDO2
ENSG00000151812.15_6	0	0	0	20	10	4	0	0	0	0.125036	0.041548	0.018015	ENSG00000151812	5.719764106	up	0.007558707	0.031601715	SLC35F4
ENSG00000151834.15_6	80	137	105	6	72	34	0.214482	0.897155	0.426378	0.012572	0.188186	0.119356	ENSG00000151834	-2.002140824	down	0.002550863	0.012647157	GABRA2
ENSG00000151881.14_9	128	78	98	281	313	310	0.44822	0.568743	0.482533	1.723214	1.941093	1.35017	ENSG00000151881	1.296872746	up	2.29E-05	0.000194924	TMEM267
ENSG00000151892.14_5	419	183	306	1619	2793	1959	0.683631	0.434254	0.45178	4.707719	5.65931	2.732774	ENSG00000151892	2.561496398	up	8.71E-32	9.30E-30	GFRA1
ENSG00000151967.18_5	1937	572	1534	169	387	394	11.976727	7.586627	13.056707	1.389733	2.975726	2.959072	ENSG00000151967	-2.309360041	down	1.41E-15	5.03E-14	SCHIP1
ENSG00000152049.6_3	794	500	832	183	189	254	4.517091	5.756417	5.948434	1.507057	1.030297	1.534108	ENSG00000152049	-2.037934068	down	9.47E-19	4.36E-17	KCNE4
ENSG00000152056.17_7	246	189	189	90	142	153	0.717145	1.027934	0.636537	0.273424	0.429884	0.487381	ENSG00000152056	-1.029130581	down	0.002567048	0.012711386	AP1S3
ENSG00000152061.23_5	547	283	414	144	199	228	1.946912	1.86121	1.523835	0.530465	0.676602	0.86739	ENSG00000152061	-1.393730809	down	9.70E-08	1.31E-06	RABGAP1L
ENSG00000152086.9_5	6	7	12	0	0	0	0.034818	0.0864	0.103505	0	0	0	ENSG00000152086	-5.815834495	down	0.008321048	0.034165654	TUBA3E
ENSG00000152217.19_8	307	140	273	122	84	138	0.435244	0.304807	0.613012	0.215084	0.169269	0.176573	ENSG00000152217	-1.288832201	down	0.00017651	0.001233429	SETBP1
ENSG00000152256.14_6	526	570	775	211	278	352	2.584518	1.601973	1.338827	0.346527	1.153996	1.045362	ENSG00000152256	-1.498963957	down	6.38E-08	8.88E-07	PDK1
ENSG00000152284.5_5	208	156	310	58	93	112	0.69923	1.716022	1.872989	0.236395	0.374406	0.671505	ENSG00000152284	-1.654627754	down	5.17E-06	5.09E-05	TCF7L1
ENSG00000152292.17_7	18	0	10	46	72	71	0.073345	0	0.040652	0.196392	0.353429	0.37073	ENSG00000152292	2.638137308	up	0.00185942	0.009633805	SH2D6
ENSG00000152409.9_4	118	37	163	242	453	481	0.129664	0.087055	0.240706	0.323977	0.602929	0.671512	ENSG00000152409	1.670274201	up	1.07E-05	9.88E-05	JMY
ENSG00000152413.15_5	153	207	243	102	116	171	0.295854	0.82764	0.605758	0.212898	0.274492	0.449508	ENSG00000152413	-1.003016289	down	0.008956634	0.036283054	HOMER1
ENSG00000152463.15_6	0	0	0	37	18	42	0	0	0	0.249682	0.118648	0.33758	ENSG00000152463	7.172894168	up	7.24E-06	6.89E-05	OLAH
ENSG00000152518.8_6	186	133	197	43	139	133	0.504588	0.77669	0.714531	0.141411	0.455385	0.457396	ENSG00000152518	-1.043804566	down	0.012693309	0.048225625	ZFP36L2
ENSG00000152601.17_6	811	534	693	296	412	525	1.569489	2.339461	1.665261	0.58581	0.966789	1.127118	ENSG00000152601	-1.029087969	down	7.99E-06	7.55E-05	MBNL1
ENSG00000152661.9_7	996	526	714	111	185	205	3.247779	3.701458	3.111391	0.435539	0.724695	0.8443	ENSG00000152661	-2.440340731	down	8.45E-23	5.54E-21	GJA1
ENSG00000152689.18_7	70	53	140	26	42	30	0.447756	0.251571	0.705213	0.346668	0.111049	0.425422	ENSG00000152689	-1.691874892	down	0.001821525	0.009470727	RASGRP3
ENSG00000152932.8_5	8	0	15	71	60	100	0.008584	0	0.169468	0.097605	0.283689	0.143197	ENSG00000152932	3.181304298	up	7.91E-05	0.000597691	RAB3C
ENSG00000152952.12_7	2133	1555	1743	441	776	1123	5.796749	9.355632	6.443064	1.466611	2.531052	3.860407	ENSG00000152952	-1.553596761	down	4.61E-10	8.77E-09	PLOD2
ENSG00000153029.14_3	644	463	543	189	350	330	1.830443	2.468157	2.053879	0.950929	1.473941	1.460452	ENSG00000153029	-1.247881896	down	1.40E-06	1.55E-05	MR1
ENSG00000153113.23_8	4523	2046	3886	1331	2066	2401	21.496492	20.308874	23.506796	6.380538	7.50213	8.824417	ENSG00000153113	-1.105085351	down	4.69E-09	7.66E-08	CAST
ENSG00000153140.8_4	252	113	261	457	410	623	1.224596	1.434071	1.994125	2.710322	2.643688	5.338892	ENSG00000153140	1.021371763	up	0.000253302	0.001695677	CETN3
ENSG00000153162.9_4	12	14	0	71	41	81	0.02976	0.074841	0	0.227107	0.129083	0.271764	ENSG00000153162	2.475038615	up	0.006566983	0.028061845	BMP6
ENSG00000153234.14_7	244	130	96	0	6	36	0.755719	0.816027	0.432057	0	0.018622	0.131549	ENSG00000153234	-3.859779393	down	0.007881722	0.032657195	NR4A2
ENSG00000153237.18_6	118	53	160	40	32	32	0.379299	0.522014	1.277808	0.239195	0.173924	0.126701	ENSG00000153237	-1.86980042	down	0.000186204	0.001292751	CCDC148
ENSG00000153253.18_8	4	32	46	3	10	0	0.003935	0.074134	0.087763	0.006421	0.012031	0	ENSG00000153253	-3.080779911	down	0.012501099	0.047625637	SCN3A
ENSG00000153404.14_5	81	126	215	47	84	69	0.064021	0.686862	0.388037	0.156044	0.341693	0.327243	ENSG00000153404	-1.429752245	down	0.002578215	0.01275865	PLEKHG4B
ENSG00000153446.15_5	16	0	31	0	0	0	0.107299	0	0.2796	0	0	0	ENSG00000153446	-6.503619784	down	0.002515872	0.012502562	C16orf89
ENSG00000153485.5_4	565	141	328	1098	1255	1025	5.98701	3.350031	4.812743	14.162802	16.288055	13.593775	ENSG00000153485	1.537624226	up	3.52E-08	5.08E-07	TMEM251
ENSG00000153551.14_5	991	413	812	1799	2118	3994	5.363091	5.459734	6.225156	13.598074	16.79578	32.965328	ENSG00000153551	1.586522405	up	1.06E-10	2.21E-09	CMTM7
ENSG00000153561.13_4	417	259	415	1619	1926	1627	0.677051	0.907297	0.902057	3.239276	3.776124	3.344396	ENSG00000153561	1.978361205	up	1.63E-25	1.26E-23	RMND5A
ENSG00000153714.6_4	29	15	62	144	313	189	0.106898	0.114493	0.343974	0.764147	1.569901	0.941782	ENSG00000153714	2.363827546	up	8.97E-07	1.03E-05	LURAP1L
ENSG00000153879.9_5	607	340	625	3171	4501	4577	1.800757	2.307784	2.247848	11.985944	16.684023	15.31314	ENSG00000153879	2.693848058	up	8.74E-57	2.29E-54	CEBPG
ENSG00000153885.14_5	146	22	94	381	494	586	0.306439	0.096842	0.33504	1.328837	1.856679	2.361348	ENSG00000153885	2.320975033	up	1.45E-09	2.56E-08	KCTD15
ENSG00000153898.13_5	185	149	258	80	88	83	0.679093	1.088929	1.149013	0.366317	0.346758	0.413913	ENSG00000153898	-1.52274813	down	1.92E-05	0.000167408	MCOLN2
ENSG00000153956.16_6	142	109	112	34	36	91	0.215968	0.349699	0.212481	0.054808	0.082005	0.181294	ENSG00000153956	-1.513129007	down	0.001907571	0.00985516	CACNA2D1
ENSG00000154080.14_6	177	55	65	20	11	18	0.155863	0.10348	0.076511	0.021438	0.010853	0.019198	ENSG00000154080	-2.784791921	down	3.33E-06	3.42E-05	CHST9
ENSG00000154096.14_8	72100	36292	52232	17117	18783	17841	167.911987	179.44606	161.079666	47.511215	51.569118	51.505215	ENSG00000154096	-1.828778205	down	4.01E-34	4.60E-32	THY1
ENSG00000154102.11_8	31	5	31	97	65	140	0.29956	0.073459	0.332333	1.248085	0.967852	1.929612	ENSG00000154102	2.015633087	up	0.001197754	0.006604292	C16orf74
ENSG00000154118.13_4	12	5	4	65	42	26	0.029777	0.019821	0.052241	0.260696	0.115349	0.12182	ENSG00000154118	2.463587932	up	0.004572575	0.020709062	JPH3
ENSG00000154162.15_6	182	132	242	52	37	121	0.946719	0.995447	1.404315	0.147108	0.105345	0.525895	ENSG00000154162	-1.700444766	down	0.000158218	0.00111651	CDH12
ENSG00000154188.10_6	726	529	925	17	65	27	1.710689	2.725061	2.913104	0.045199	0.17689	0.077321	ENSG00000154188	-4.630710248	down	2.19E-39	3.15E-37	ANGPT1
ENSG00000154229.12_5	446	380	456	1788	2028	2242	0.753553	0.986277	0.854842	2.621334	2.819569	3.514356	ENSG00000154229	1.924205778	up	5.05E-22	3.03E-20	PRKCA
ENSG00000154263.17_5	9	4	16	0	0	0	0.01152	0.13522	0.038875	0	0	0	ENSG00000154263	-5.920356017	down	0.006140555	0.02657155	ABCA10
ENSG00000154265.16_6	632	461	506	364	263	328	3.190594	3.987317	2.12922	1.655973	1.066524	1.495822	ENSG00000154265	-1.028660721	down	0.000124684	0.000903364	ABCA5
ENSG00000154277.13_5	38808	14092	24094	69839	62606	73223	357.299957	275.712891	273.135223	892.394409	750.558472	933.013977	ENSG00000154277	1.21357047	up	2.57E-10	5.06E-09	UCHL1
ENSG00000154359.13_5	55	12	66	136	101	155	0.160696	0.066339	0.243263	0.508119	0.561617	0.605799	ENSG00000154359	1.40125213	up	0.007515683	0.031444114	LONRF1
ENSG00000154451.14_5	1030	487	737	121	154	144	3.775147	3.372865	3.518853	0.552247	0.766384	0.810368	ENSG00000154451	-2.677117295	down	3.11E-30	3.18E-28	GBP5
ENSG00000154473.18_5	24646	12991	20386	48258	57016	40652	157.366852	182.956009	183.100784	397.966614	359.583893	321.689697	ENSG00000154473	1.084380113	up	1.73E-10	3.49E-09	BUB3
ENSG00000154511.12_5	839	791	1093	372	318	515	3.323286	7.467536	5.797414	1.787307	1.520088	2.580761	ENSG00000154511	-1.494021364	down	4.35E-09	7.12E-08	DIPK1A
ENSG00000154518.9_5	22872	7483	13540	7860	7915	7215	168.888992	127.420464	125.17939	75.580559	82.714233	79.233315	ENSG00000154518	-1.123522772	down	5.78E-08	8.08E-07	ATP5MC3
ENSG00000154548.9_5	27	4	0	97	77	57	0.240868	0.022588	0	0.348964	0.271242	0.198517	ENSG00000154548	2.783849118	up	0.001937158	0.00998616	SRSF12
ENSG00000154582.16_5	1871	986	1831	5602	5087	3934	15.589844	15.257607	19.385044	69.234856	53.584499	48.156349	ENSG00000154582	1.415973796	up	3.36E-12	8.39E-11	ELOC
ENSG00000154646.9_6	293	205	297	99	87	140	1.541838	1.901941	1.546655	0.444046	0.398202	0.659688	ENSG00000154646	-1.574174768	down	1.03E-06	1.17E-05	TMPRSS15
ENSG00000154710.17_5	1338	854	1038	4058	4252	3310	5.029935	6.884214	5.072911	18.418653	19.199732	15.587073	ENSG00000154710	1.574930627	up	3.93E-16	1.47E-14	RABGEF1
ENSG00000154734.15_8	144	129	279	52	130	91	0.278311	0.729715	0.935256	0.120791	0.304257	0.220649	ENSG00000154734	-1.326528906	down	0.001666706	0.008772039	ADAMTS1
ENSG00000154736.6_6	27	13	38	4	4	4	0.027872	0.029009	0.051789	0.004702	0.004839	0.004615	ENSG00000154736	-2.920475499	down	0.00383383	0.017832029	ADAMTS5
ENSG00000154743.18_7	379	285	356	893	1104	1057	1.704069	2.776105	2.645735	5.075434	5.79246	6.074769	ENSG00000154743	1.280139383	up	1.02E-09	1.85E-08	TSEN2
ENSG00000154781.16_4	1162	802	944	2251	2779	2502	4.931859	10.861094	5.673809	9.936152	11.992315	11.50056	ENSG00000154781	1.07682644	up	1.63E-09	2.86E-08	CCDC174
ENSG00000154803.13_7	579	317	418	1141	1593	1110	3.013378	3.506638	2.595812	7.298067	10.394205	7.848993	ENSG00000154803	1.282175948	up	3.31E-09	5.53E-08	FLCN
ENSG00000154930.15_5	38	20	53	167	217	186	0.078907	0.088369	0.180622	0.571173	0.725731	0.54962	ENSG00000154930	2.117247088	up	4.54E-07	5.53E-06	ACSS1
ENSG00000154945.7_5	3741	2557	4508	14390	13188	10755	9.028355	13.402385	14.554653	42.154789	38.376324	32.809753	ENSG00000154945	1.573383884	up	6.60E-16	2.41E-14	ANKRD40
ENSG00000155324.10_8	217	91	183	34	34	95	0.725833	0.652052	0.840458	0.131124	0.137307	0.410415	ENSG00000155324	-1.844413309	down	7.55E-05	0.000573714	GRAMD2B
ENSG00000155465.19_5	0	0	0	20	19	12	0	0	0	0.102214	0.099533	0.062882	ENSG00000155465	6.252243983	up	0.000816734	0.00475438	SLC7A7
ENSG00000155792.10_4	166	177	259	72	96	94	0.799455	1.955469	1.351912	0.389162	0.600756	0.542408	ENSG00000155792	-1.529593958	down	3.46E-05	0.000283797	DEPTOR
ENSG00000155827.12_4	2141	1146	2000	820	997	1244	5.551342	6.444816	6.839049	2.576344	3.158929	4.014834	ENSG00000155827	-1.051746992	down	3.14E-09	5.28E-08	RNF20
ENSG00000155850.8_4	891	407	674	165	146	304	1.112671	1.096734	1.124983	0.249485	0.218602	0.47821	ENSG00000155850	-1.932251373	down	1.28E-11	2.99E-10	SLC26A2
ENSG00000155893.13_8	340	235	321	176	114	140	1.663302	1.755671	1.562256	2.548243	1.064847	1.150129	ENSG00000155893	-1.321065059	down	3.91E-05	0.000315904	PXYLP1
ENSG00000155961.5_5	188	57	117	681	916	783	0.554041	0.359085	0.457416	2.432945	3.253092	2.912618	ENSG00000155961	2.508680682	up	1.04E-19	5.22E-18	RAB39B
ENSG00000155975.10_6	835	476	671	1432	2043	1787	3.021312	3.205063	2.746998	5.993356	7.181402	7.258443	ENSG00000155975	1.132902908	up	3.61E-10	6.97E-09	VPS37A
ENSG00000155980.12_4	307	110	264	733	656	497	0.531371	0.412919	0.618802	1.546212	1.404212	1.182812	ENSG00000155980	1.284872096	up	1.14E-05	0.000104428	KIF5A
ENSG00000156011.17_6	2068	1140	1728	458	551	843	6.410899	10.576318	7.360885	1.086765	1.955974	1.832018	ENSG00000156011	-1.692583662	down	5.35E-16	1.97E-14	PSD3
ENSG00000156170.13_5	207	96	266	292	551	615	2.057192	1.782602	2.916659	2.410964	5.948312	6.042211	ENSG00000156170	1.103202982	up	0.000444979	0.002789093	NDUFAF6
ENSG00000156299.13_6	393	191	349	110	203	192	0.595962	0.574303	0.794235	0.259001	0.533343	0.33761	ENSG00000156299	-1.150357426	down	0.000109657	0.000805618	TIAM1
ENSG00000156453.13_9	83	53	91	225	351	363	0.217363	0.300267	0.318604	0.572017	0.887774	0.962118	ENSG00000156453	1.761704416	up	5.90E-08	8.25E-07	PCDH1
ENSG00000156469.9_7	444	215	283	647	1005	960	3.051969	3.199112	2.821802	5.590969	8.553711	8.523904	ENSG00000156469	1.20259003	up	2.47E-07	3.13E-06	MTERF3
ENSG00000156502.14_5	359	189	257	628	969	970	1.521676	1.647386	1.453151	3.14343	4.794623	5.042997	ENSG00000156502	1.395759898	up	1.09E-09	1.96E-08	SUPV3L1
ENSG00000156504.16_4	147	95	170	38	41	29	0.34031	0.47297	0.525939	0.104863	0.113517	0.083798	ENSG00000156504	-2.188668359	down	6.04E-07	7.17E-06	FAM122B
ENSG00000156508.18_7	81710	30647	52084	176213	203937	289998	250.884094	228.73555	314.019623	975.817261	1153.966919	1450.057373	ENSG00000156508	1.796738397	up	1.89E-20	1.01E-18	EEF1A1
ENSG00000156510.13_4	103	36	94	2840	4640	3536	0.278176	0.268074	0.414195	9.824624	15.732617	12.973326	ENSG00000156510	5.328781346	up	2.04E-121	2.54E-118	HKDC1
ENSG00000156521.14_5	147	48	82	184	228	271	0.392804	0.277274	0.292285	0.596756	0.740727	1.030854	ENSG00000156521	1.081625054	up	0.003252235	0.015518295	TYSND1
ENSG00000156535.15_8	710	473	734	163	185	153	0.759014	1.091836	1.050153	0.210666	0.238364	0.205588	ENSG00000156535	-2.20889413	down	2.70E-20	1.44E-18	CD109
ENSG00000156587.16_6	72408	27610	35235	26522	16527	26019	597.014526	491.342987	388.695892	264.637115	164.364838	270.983459	ENSG00000156587	-1.174189176	down	1.14E-06	1.28E-05	UBE2L6
ENSG00000156650.14_8	541	329	454	112	342	244	0.859065	1.326164	1.269021	0.191681	0.808212	0.59045	ENSG00000156650	-1.236357323	down	0.00011896	0.000867487	KAT6B
ENSG00000156689.7_5	70	38	110	14	8	15	0.44691	0.521515	1.127183	0.110562	0.06217	0.119828	ENSG00000156689	-2.778109263	down	1.78E-05	0.000155617	GLYATL2
ENSG00000157064.11_5	65	45	53	140	200	153	0.119603	0.179252	0.169157	0.332172	0.442566	0.457994	ENSG00000157064	1.300946353	up	0.001214637	0.006681776	NMNAT2
ENSG00000157087.20_9	6	25	29	0	0	4	0.00704	0.058598	0.04251	0	0	0.005586	ENSG00000157087	-4.390530016	down	0.002867475	0.01393305	ATP2B2
ENSG00000157111.13_5	45	11	15	0	0	4	0.363837	0.180169	0.155341	0	0	0.039549	ENSG00000157111	-4.38558786	down	0.002078469	0.010603473	TMEM171
ENSG00000157150.5_5	1322	628	866	6689	5141	6834	11.136435	11.413411	9.74935	68.37455	52.193836	72.744308	ENSG00000157150	2.493721679	up	7.94E-36	9.91E-34	TIMP4
ENSG00000157168.20_7	54	72	82	168	351	222	0.082132	0.595335	0.464611	0.509789	0.92585	0.77284	ENSG00000157168	1.461127322	up	0.000387427	0.002478463	NRG1
ENSG00000157212.19_5	277	133	145	67	103	167	0.687841	0.688871	0.474797	0.220184	0.243596	0.537175	ENSG00000157212	-1.0074314	down	0.011260108	0.043802712	PAXIP1
ENSG00000157227.13_4	331	198	224	118	101	228	0.991796	1.25273	1.055719	0.473857	0.339389	0.781072	ENSG00000157227	-1.047485323	down	0.003491906	0.01642288	MMP14
ENSG00000157240.4_4	200	168	285	84	122	158	0.290964	0.527267	0.555697	0.147892	0.21454	0.290818	ENSG00000157240	-1.156385978	down	0.000913878	0.005239759	FZD1
ENSG00000157330.10_5	0	0	0	85	74	76	0	0	0	0.327285	0.301436	0.268851	ENSG00000157330	8.446608328	up	5.84E-10	1.10E-08	C1orf158
ENSG00000157388.19_9	56	41	45	0	17	7	0.36494	0.361267	0.09651	0	0.082205	0.009136	ENSG00000157388	-2.936859241	down	0.001298112	0.0070832	CACNA1D
ENSG00000157399.16_8	694	415	638	252	246	278	3.4731	6.545484	4.438188	1.443622	1.710719	1.577288	ENSG00000157399	-1.43466543	down	2.74E-10	5.39E-09	ARSL
ENSG00000157502.13_4	424	131	213	49	73	76	1.016239	0.659427	0.684951	0.136901	0.205522	0.228567	ENSG00000157502	-2.170627514	down	1.01E-08	1.58E-07	PWWP3B
ENSG00000157514.16_8	1534	735	874	6288	8471	7002	7.173506	7.291752	5.518648	36.862743	47.318966	41.35593	ENSG00000157514	2.533195966	up	2.59E-40	3.88E-38	TSC22D3
ENSG00000157538.14_6	602	276	570	1018	1236	1328	2.533517	2.465565	3.24224	5.106214	6.780167	7.317404	ENSG00000157538	1.067197165	up	9.16E-08	1.24E-06	VPS26C
ENSG00000157542.11_7	62	57	63	0	0	8	0.031457	0.062297	0.042753	0	0	0.004569	ENSG00000157542	-4.891601819	down	4.55E-07	5.53E-06	KCNJ6
ENSG00000157601.14_5	6716	2848	4484	207	220	370	24.810181	22.794064	22.595224	0.819211	1.086945	1.933573	ENSG00000157601	-4.385432342	down	5.78E-92	3.68E-89	MX1
ENSG00000157617.17_6	108	20	106	144	240	329	0.166477	0.065929	0.218459	0.27037	0.510114	0.644259	ENSG00000157617	1.422421594	up	0.001808495	0.009411271	C2CD2
ENSG00000157625.15_5	151	97	191	46	82	33	0.212696	0.294966	0.362499	0.078929	0.136471	0.058521	ENSG00000157625	-1.712311709	down	0.000158452	0.001117803	TAB3
ENSG00000157657.14_5	1175	516	818	396	418	440	1.460155	1.859268	1.853793	0.575926	1.223579	1.6702	ENSG00000157657	-1.234591075	down	1.04E-08	1.63E-07	ZNF618
ENSG00000157693.15_6	110	34	98	228	331	393	0.240545	0.221619	0.28679	0.60777	0.892135	1.107329	ENSG00000157693	1.758026564	up	7.34E-07	8.58E-06	TMEM268
ENSG00000157741.15_4	252	149	146	141	86	89	0.184117	0.219567	0.132763	0.116479	0.070205	0.076732	ENSG00000157741	-1.040510272	down	0.009483151	0.038011511	UBN2
ENSG00000157778.9_5	12551	5347	9006	24374	25002	17789	104.355354	103.956886	93.841042	216.881866	222.088226	166.981659	ENSG00000157778	1.107168907	up	2.20E-08	3.26E-07	PSMG3
ENSG00000157796.18_5	110	79	148	252	265	345	0.462803	0.622872	0.569544	1.075744	1.048092	1.137873	ENSG00000157796	1.076518656	up	0.000815864	0.004750487	WDR19
ENSG00000157823.17_6	2506	1392	2224	4578	5673	4545	5.274169	8.627854	8.146058	16.273642	19.827934	17.127047	ENSG00000157823	1.01578336	up	2.33E-10	4.62E-09	AP3S2
ENSG00000157833.13_5	40	22	94	324	343	339	0.094425	0.091681	0.243977	0.947362	0.997849	0.838044	ENSG00000157833	2.46997041	up	1.51E-09	2.66E-08	GAREM2
ENSG00000158023.10_5	8	11	20	123	102	48	0.021235	0.078667	0.080963	0.448782	0.473081	0.167303	ENSG00000158023	2.537064342	up	0.000154992	0.001095716	WDR66
ENSG00000158079.16_7	86	64	155	197	321	326	0.264602	0.331299	0.671124	0.676536	0.934793	1.029392	ENSG00000158079	1.185526719	up	0.001018351	0.005730196	PTPDC1
ENSG00000158109.15_4	73	89	81	188	144	364	0.30422	0.799236	0.451653	0.952445	0.726486	1.922748	ENSG00000158109	1.142244994	up	0.00856343	0.034948094	TPRG1L
ENSG00000158125.10_5	129	55	122	18	23	12	0.226654	0.414261	0.576693	0.038215	0.047574	0.026215	ENSG00000158125	-2.745267286	down	4.40E-07	5.35E-06	XDH
ENSG00000158270.12_6	90	29	72	13	28	3	0.160685	0.106574	0.170009	0.031969	0.057693	0.006158	ENSG00000158270	-2.312052788	down	0.002468725	0.012301934	COLEC12
ENSG00000158315.11_6	287	108	264	45	61	123	1.555655	1.33843	1.884605	0.305303	0.372912	0.824631	ENSG00000158315	-1.76574471	down	1.79E-05	0.000156298	RHBDL2
ENSG00000158352.15_4	249	145	240	80	83	95	0.262062	0.64462	0.346467	0.101568	0.104419	0.125794	ENSG00000158352	-1.559337741	down	2.48E-06	2.61E-05	SHROOM4
ENSG00000158445.10_6	56	65	127	47	12	34	0.047304	0.131738	0.163357	0.057144	0.011847	0.039229	ENSG00000158445	-1.673467353	down	0.008377893	0.034339325	KCNB1
ENSG00000158457.6_4	711	264	608	180	209	188	2.575255	2.148	3.362638	0.787886	0.905406	1.414976	ENSG00000158457	-1.664518246	down	4.73E-10	8.97E-09	TSPAN33
ENSG00000158483.16_6	138	46	81	213	312	276	0.696452	0.485808	0.7642	1.565339	2.064774	1.777086	ENSG00000158483	1.373286202	up	9.87E-05	0.000730749	FAM86C1
ENSG00000158528.12_5	205	97	269	379	504	517	0.203671	0.19825	0.377351	0.489014	0.642331	1.065984	ENSG00000158528	1.057579961	up	0.000228314	0.001545555	PPP1R9A
ENSG00000158604.15_7	10980	5254	9280	31145	26913	26111	52.558914	54.937119	59.034985	171.841354	149.570892	152.428223	ENSG00000158604	1.500121323	up	1.38E-17	5.70E-16	TMED4
ENSG00000158747.15_5	118	72	155	544	486	663	0.546899	0.717108	0.960081	3.072846	2.726236	3.900373	ENSG00000158747	2.042299116	up	5.61E-13	1.53E-11	NBL1
ENSG00000158769.18_6	1092	392	867	415	346	355	2.474226	1.810041	2.937551	1.182483	0.904955	1.070494	ENSG00000158769	-1.264908172	down	7.30E-07	8.53E-06	F11R
ENSG00000158856.18_5	181	55	117	25	40	22	0.652942	0.428755	0.564076	0.109236	0.172657	0.096468	ENSG00000158856	-2.218503635	down	1.34E-05	0.000120282	DMTN
ENSG00000158859.10_5	46	80	104	33	28	48	0.047213	0.177677	0.141717	0.040282	0.033959	0.062091	ENSG00000158859	-1.4458199	down	0.012187738	0.046710756	ADAMTS4
ENSG00000159055.4_5	415	332	510	1018	1107	1006	2.701735	4.664468	4.443282	8.064683	8.686579	8.270906	ENSG00000159055	1.02841194	up	2.46E-06	2.59E-05	MIS18A
ENSG00000159131.17_7	860	511	886	1431	2270	1845	3.372531	4.775233	4.753768	6.792296	11.571291	9.030245	ENSG00000159131	1.022378769	up	5.61E-08	7.88E-07	GART
ENSG00000159167.12_5	8606	6390	6882	797	823	1047	22.526947	36.099323	24.078846	2.511824	2.623927	3.443106	ENSG00000159167	-3.347881895	down	7.09E-75	2.83E-72	STC1
ENSG00000159184.8_4	424	286	477	177	134	140	1.400802	2.039054	2.108719	0.710133	0.533333	0.584549	ENSG00000159184	-1.649956405	down	1.71E-08	2.57E-07	HOXB13
ENSG00000159200.18_5	6449	4106	5609	35252	67599	44303	27.606335	37.032425	31.776018	180.037384	344.020203	236.767303	ENSG00000159200	2.889026684	up	1.50E-52	3.41E-50	RCAN1
ENSG00000159208.16_5	282	122	180	494	727	333	2.303041	2.054647	2.078991	5.547754	7.392547	3.79689	ENSG00000159208	1.180183386	up	0.000242952	0.001633868	CIART
ENSG00000159216.18_7	686	330	544	184	343	363	4.261469	1.931829	3.86359	0.55372	1.011166	2.1715	ENSG00000159216	-1.080757889	down	3.76E-05	0.000305492	RUNX1
ENSG00000159231.6_4	3294	1574	3155	1552	1321	1370	33.202351	34.2397	42.516521	18.980114	16.036177	17.442682	ENSG00000159231	-1.138302002	down	3.66E-09	6.07E-08	CBR3
ENSG00000159352.16_5	26737	10895	19457	55132	55163	38841	204.903473	179.134857	198.941895	508.039093	505.888062	373.74353	ENSG00000159352	1.180992234	up	6.01E-09	9.65E-08	PSMD4
ENSG00000159398.16_5	0	0	0	17	10	6	0	0	0	0.090235	0.05369	0.029108	ENSG00000159398	5.65686709	up	0.008314967	0.034152565	CES5A
ENSG00000159403.11	5855	4256	6289	911	871	1217	50.714764	79.355675	73.067581	10.123919	9.675535	9.750527	ENSG00000159403	-2.742374691	down	1.34E-53	3.14E-51	C1R
ENSG00000159459.12_6	421	288	358	162	184	291	0.563686	0.893594	0.668423	0.254546	0.324552	0.683877	ENSG00000159459	-1.050704115	down	0.000257854	0.001721339	UBR1
ENSG00000159479.17_5	3537	1558	2786	7883	8509	7417	18.47965	17.594662	19.355261	50.884365	53.071911	49.704353	ENSG00000159479	1.370623703	up	7.82E-16	2.84E-14	MED8
ENSG00000159720.12_6	12139	6090	9613	4585	4936	4276	75.661217	84.082161	79.391502	34.377808	36.952328	33.539467	ENSG00000159720	-1.254177838	down	3.93E-15	1.36E-13	ATP6V0D1
ENSG00000159792.10_4	244	80	115	65	98	43	0.701912	0.494731	0.542766	0.225103	0.442762	0.221244	ENSG00000159792	-1.295321074	down	0.005345644	0.023576968	PSKH1
ENSG00000159860.7_5	36	17	21	3	3	2	0.155872	0.150142	0.135839	0.01288	0.012619	0.005412	ENSG00000159860	-3.449669768	down	0.001409343	0.007602274	NA
ENSG00000159958.6_5	134	118	132	14	15	3	0.340138	0.644448	0.448012	0.040263	0.045657	0.006574	ENSG00000159958	-3.881268106	down	3.32E-11	7.35E-10	TNFRSF13C
ENSG00000160013.9_6	12	83	90	0	12	4	0.051652	0.889436	0.579561	0	0.064797	0.012735	ENSG00000160013	-4.044213039	down	3.46E-05	0.000283682	PTGIR
ENSG00000160049.12_5	5433	2766	4897	10175	11047	10175	14.466181	16.401653	23.128534	41.013412	39.191841	36.574638	ENSG00000160049	1.020622936	up	1.60E-11	3.69E-10	DFFA
ENSG00000160055.19_4	521	214	458	1023	989	769	3.963055	3.420336	4.144133	10.113516	9.483024	7.550195	ENSG00000160055	1.016983141	up	3.86E-05	0.000312222	TMEM234
ENSG00000160087.21_8	153	40	162	219	368	467	0.747092	0.635859	1.036062	1.691541	2.689675	3.172314	ENSG00000160087	1.3643857	up	0.000333289	0.002163722	UBE2J2
ENSG00000160111.13_5	12	0	29	0	0	0	0.034595	0	0.06295	0	0	0	ENSG00000160111	-6.313290433	down	0.004784909	0.021530268	CPAMD8
ENSG00000160124.9_4	300	176	292	611	782	650	4.432138	5.372667	5.435554	10.713234	13.319448	11.806765	ENSG00000160124	1.14730649	up	4.20E-07	5.12E-06	CCDC58
ENSG00000160172.10_4	67	26	40	87	126	153	0.268402	0.448554	0.285136	0.431024	0.801242	1.03042	ENSG00000160172	1.212080005	up	0.009465414	0.037959751	FAM86C2P
ENSG00000160179.18_7	0	0	2	77	108	94	0	0	0.015181	0.302215	0.416884	0.394119	ENSG00000160179	6.860165437	up	9.16E-09	1.44E-07	ABCG1
ENSG00000160188.10_5	25	7	0	0	0	0	0.084932	0.105093	0	0	0	0	ENSG00000160188	-6.062300196	down	0.010603766	0.04168919	RSPH1
ENSG00000160193.12_5	365	150	375	662	976	806	2.453052	2.089547	3.320943	5.38481	7.876866	6.546848	ENSG00000160193	1.229613591	up	5.38E-07	6.46E-06	WDR4
ENSG00000160200.18_4	84	32	25	1209	2122	1485	0.457754	0.34792	0.367014	6.03676	10.496429	7.650996	ENSG00000160200	4.838462784	up	1.09E-53	2.63E-51	CBS
ENSG00000160207.9_6	59	15	18	148	211	216	0.316797	0.160762	0.126705	0.944526	1.341113	1.43842	ENSG00000160207	2.434068886	up	4.78E-07	5.77E-06	HSF2BP
ENSG00000160213.8_5	728	235	594	2533	1866	1427	11.626616	8.129994	13.365313	51.480843	37.37244	29.539984	ENSG00000160213	1.745044279	up	4.78E-10	9.06E-09	CSTB
ENSG00000160223.17_5	101	46	110	211	204	210	0.159137	0.140427	0.433599	0.463161	0.430038	0.656354	ENSG00000160223	1.060069385	up	0.003274231	0.015607475	ICOSLG
ENSG00000160298.18_8	510	324	294	175	300	213	1.836777	2.514568	1.380927	1.042771	1.343948	0.909322	ENSG00000160298	-1.022450507	down	0.000715777	0.004235625	C21orf58
ENSG00000160307.10_5	588	293	522	64	7	31	5.403132	5.742171	6.813427	0.731629	0.097102	0.386748	ENSG00000160307	-3.944021168	down	2.42E-06	2.55E-05	S100B
ENSG00000160321.15_7	0	0	0	11	21	7	0	0	0	0.16193	0.032774	0.090011	ENSG00000160321	5.837551163	up	0.004478633	0.020349976	ZNF208
ENSG00000160410.15_5	3333	1742	2140	1491	1380	1415	16.919706	16.809231	14.083249	8.393668	7.956901	8.486403	ENSG00000160410	-1.002901486	down	2.18E-07	2.78E-06	SHKBP1
ENSG00000160633.13_4	390	215	441	450	566	1561	1.459386	1.831098	2.045151	2.226199	2.308849	7.124856	ENSG00000160633	1.01127957	up	0.003438894	0.016215559	SAFB
ENSG00000160679.13_5	3748	1556	3048	9147	11592	10038	17.944931	15.731356	19.755257	53.049259	67.718262	61.252743	ENSG00000160679	1.656278561	up	5.10E-23	3.44E-21	CHTOP
ENSG00000160710.17_9	3126	1350	2498	1275	1433	1342	8.513132	8.838947	8.861121	3.49476	3.711988	2.577472	ENSG00000160710	-1.010562696	down	1.18E-08	1.83E-07	ADAR
ENSG00000160783.19_7	5204	1990	3372	1821	1751	1366	49.523335	40.633026	42.415695	21.150826	19.903984	16.642687	ENSG00000160783	-1.298097982	down	1.98E-09	3.42E-08	PMF1
ENSG00000160785.13_3	800	554	792	304	564	443	2.282314	1.729732	2.984456	0.699715	1.882189	0.808373	ENSG00000160785	-1.015827579	down	1.33E-05	0.000119595	SLC25A44
ENSG00000160813.7_5	23	12	13	100	57	84	0.304752	0.297092	0.184659	1.347896	0.707617	1.120697	ENSG00000160813	2.090439392	up	0.000770695	0.004513085	PPP1R35
ENSG00000160862.13_8	201	97	207	17	24	50	1.670918	1.797448	2.346932	0.182738	0.15428	0.52487	ENSG00000160862	-2.738055283	down	3.48E-09	5.80E-08	AZGP1
ENSG00000160932.11_6	108882	59405	81966	4109	3545	4146	992.165527	1161.607788	990.628662	47.686016	39.771824	52.759953	ENSG00000160932	-4.658559511	down	2.05E-177	1.62E-173	LY6E
ENSG00000160972.9_4	198	182	239	312	529	780	2.0182	2.937164	0.975721	3.203112	6.476081	3.767612	ENSG00000160972	1.040130569	up	0.000891488	0.005127577	PPP1R16A
ENSG00000160993.4_5	1157	528	941	329	439	439	5.60156	5.471762	6.706957	1.915674	2.551473	2.661325	ENSG00000160993	-1.36680164	down	4.10E-11	9.01E-10	ALKBH4
ENSG00000161011.20_6	9292	5040	8406	21921	28858	34596	34.968117	39.777172	46.114429	98.237015	140.588211	161.917374	ENSG00000161011	1.639062538	up	2.09E-27	1.81E-25	SQSTM1
ENSG00000161016.17_7	195586	79682	128346	339770	364802	340775	1921.773438	1702.493042	1723.075562	4037.269043	4277.84082	4189.616699	ENSG00000161016	1.152072617	up	1.66E-11	3.82E-10	RPL8
ENSG00000161048.11_5	537	330	519	122	228	186	2.241337	1.740395	2.619929	0.435645	0.793548	0.516465	ENSG00000161048	-1.65973795	down	4.99E-10	9.42E-09	NAPEPLD
ENSG00000161091.13_6	215	94	270	334	460	605	1.823439	1.73615	2.918086	3.148848	4.706126	5.541892	ENSG00000161091	1.033847648	up	0.00066949	0.003999823	MFSD12
ENSG00000161179.14_5	40	43	94	247	276	782	0.281776	0.574022	0.778048	1.858659	2.72351	7.303535	ENSG00000161179	2.554374794	up	9.40E-09	1.48E-07	YDJC
ENSG00000161243.9_10	103	44	136	281	397	260	0.44623	0.407034	0.787717	1.476963	2.116608	1.426817	ENSG00000161243	1.510848885	up	2.40E-05	0.000202827	FBXO27
ENSG00000161249.21_8	1835	879	1285	3489	3199	3373	25.331879	24.97139	23.610111	64.123993	58.240688	62.418541	ENSG00000161249	1.094778719	up	2.27E-09	3.87E-08	DMKN
ENSG00000161265.15_8	2222	1013	1797	4797	4666	4552	21.79015	21.92038	23.016994	57.702423	57.289238	59.921547	ENSG00000161265	1.252088766	up	5.42E-13	1.48E-11	U2AF1L4
ENSG00000161277.11_5	447	437	370	1010	1106	1328	3.49222	7.22032	4.01206	9.641628	10.279093	13.449465	ENSG00000161277	1.104594987	up	1.08E-05	9.96E-05	THAP8
ENSG00000161542.17_6	1470	804	1204	2656	3024	2850	5.072067	5.450722	5.245733	10.78628	11.726445	11.545382	ENSG00000161542	1.035657974	up	1.21E-10	2.51E-09	PRPSAP1
ENSG00000161551.14_4	199	111	300	559	331	540	0.876812	1.965443	2.109982	3.656219	1.980826	3.675486	ENSG00000161551	1.013422165	up	0.002131769	0.01082858	ZNF577
ENSG00000161653.11_4	165	111	180	453	470	400	0.826652	1.224443	1.232501	2.779869	2.879918	2.594383	ENSG00000161653	1.271694754	up	3.91E-06	3.96E-05	NAGS
ENSG00000161791.14_7	2418	1850	2493	524	671	772	2.039516	3.659946	2.815597	0.526627	0.839454	0.923664	ENSG00000161791	-2.091686135	down	9.71E-30	9.79E-28	FMNL3
ENSG00000161860.8_7	91	61	96	28	49	23	0.851828	1.035122	1.024055	0.271264	0.468415	0.230238	ENSG00000161860	-1.591969158	down	0.002753481	0.013481834	SYCE2
ENSG00000161970.15_9	17737	8699	13173	38261	35600	25764	291.588562	316.048401	294.610199	781.799194	688.931213	532.84967	ENSG00000161970	1.105568169	up	3.19E-08	4.63E-07	RPL26
ENSG00000162004.17_7	5	0	0	18	27	32	0.012391	0	0	0.062895	0.092467	0.154948	ENSG00000162004	3.814766327	up	0.006183322	0.026741903	CCDC78
ENSG00000162039.15_6	0	0	0	8	12	26	0	0	0	0.0485	0.076888	0.170326	ENSG00000162039	6.038483467	up	0.002135861	0.01084703	MEIOB
ENSG00000162241.12_4	338	237	414	153	91	128	0.488274	0.775567	1.037512	0.337955	0.153536	0.227809	ENSG00000162241	-1.661404424	down	5.05E-07	6.07E-06	SLC25A45
ENSG00000162373.13_6	1066	475	481	98	123	187	6.916211	6.601293	4.129087	0.773051	0.884883	1.614588	ENSG00000162373	-2.578007986	down	3.25E-17	1.31E-15	BEND5
ENSG00000162385.11_5	1833	970	1433	4045	4279	2897	29.027189	32.954384	31.064476	78.630829	82.368294	58.632919	ENSG00000162385	1.164673564	up	1.22E-08	1.88E-07	MAGOH
ENSG00000162390.17_3	65	18	67	4	24	15	0.144892	0.089551	0.29943	0.0184	0.078817	0.029749	ENSG00000162390	-2.031199315	down	0.009743222	0.038856014	ACOT11
ENSG00000162396.6_5	44	40	89	148	307	273	0.18636	0.366821	0.507708	0.765485	1.57671	1.47205	ENSG00000162396	1.76554984	up	2.22E-05	0.000189926	PARS2
ENSG00000162408.11_5	384	140	381	653	793	648	0.686292	0.534698	0.88804	1.239934	1.608025	1.241228	ENSG00000162408	1.006088786	up	0.000118033	0.000860991	NOL9
ENSG00000162413.16_6	310	143	186	500	530	610	0.483493	0.646966	0.538826	1.338786	1.427912	1.727805	ENSG00000162413	1.110661308	up	1.89E-05	0.000164374	KLHL21
ENSG00000162426.14_4	82	57	79	34	39	31	0.346641	0.608112	0.52739	0.146723	0.1748	0.137212	ENSG00000162426	-1.348955874	down	0.009496633	0.038052625	SLC45A1
ENSG00000162433.15_5	4647	2658	3720	1637	1581	2297	11.766153	32.294216	9.163578	4.810469	2.798903	5.320322	ENSG00000162433	-1.271075829	down	7.25E-13	1.94E-11	AK4
ENSG00000162441.12_6	880	415	664	1675	1730	1931	4.722641	4.140595	6.016802	8.457976	15.988712	15.222448	ENSG00000162441	1.203739332	up	6.16E-11	1.31E-09	LZIC
ENSG00000162496.9_6	24339	7945	11119	45819	43529	40055	112.804207	79.307419	68.866859	256.228638	242.422775	234.390289	ENSG00000162496	1.384328028	up	1.40E-09	2.48E-08	DHRS3
ENSG00000162511.8_5	208	77	214	43	12	56	0.958073	0.754422	1.371092	0.259749	0.066751	0.325951	ENSG00000162511	-2.356995001	down	8.93E-06	8.34E-05	LAPTM5
ENSG00000162630.6_5	5	8	12	0	0	0	0.013725	0.04839	0.041858	0	0	0	ENSG00000162630	-5.847583695	down	0.007735305	0.032169111	B3GALT2
ENSG00000162636.16_4	121	53	94	51	30	32	0.256423	0.181449	0.214163	0.105643	0.042928	0.047713	ENSG00000162636	-1.444422087	down	0.005703221	0.024925854	FAM102B
ENSG00000162643.13_5	31	31	0	0	4	0	0.118843	0.218741	0	0	0.089681	0	ENSG00000162643	-4.442819491	down	0.00851043	0.034773879	WDR63
ENSG00000162645.13_6	903	434	681	140	68	89	2.222183	2.308578	2.244699	0.418011	0.199325	0.27461	ENSG00000162645	-2.970599253	down	6.42E-21	3.62E-19	GBP2
ENSG00000162654.9_5	58	33	74	0	0	0	0.093713	0.116168	0.16075	0	0	0	ENSG00000162654	-8.468850666	down	1.48E-09	2.60E-08	GBP4
ENSG00000162664.17_4	4565	1900	2872	959	1722	1731	5.116315	4.676907	5.216331	1.303272	2.537701	2.860903	ENSG00000162664	-1.33763563	down	2.09E-10	4.17E-09	ZNF326
ENSG00000162688.17_5	370	320	448	115	164	101	0.521333	0.976927	0.843163	0.187721	0.278586	0.177856	ENSG00000162688	-1.889373879	down	8.49E-10	1.55E-08	AGL
ENSG00000162692.12_5	211	234	337	47	60	56	0.680479	1.634256	1.451714	0.180197	0.228679	0.228238	ENSG00000162692	-2.592974124	down	1.91E-12	4.89E-11	VCAM1
ENSG00000162694.14_6	2806	1731	2572	555	939	1013	10.571763	14.156758	12.737245	2.589592	4.354693	4.688035	ENSG00000162694	-1.800112884	down	7.17E-21	4.01E-19	EXTL2
ENSG00000162706.13_5	1367	680	1079	305	331	372	3.803353	3.945157	5.283893	0.993365	1.070926	1.658963	ENSG00000162706	-1.883095867	down	3.34E-21	1.91E-19	CADM3
ENSG00000162723.10_5	116	70	52	8	27	19	1.158998	1.316204	0.657841	0.085156	0.285328	0.206079	ENSG00000162723	-2.472574041	down	7.18E-05	0.000548602	SLAMF9
ENSG00000162733.19_7	1185	759	1312	2003	3201	3661	2.2506	1.891403	2.324105	3.310945	4.053246	4.883788	ENSG00000162733	1.152867724	up	2.71E-09	4.59E-08	DDR2
ENSG00000162734.13_4	1574	841	1456	3723	4628	5352	5.875352	6.772222	7.26686	18.767799	23.180706	25.248602	ENSG00000162734	1.561126886	up	3.96E-23	2.71E-21	PEA15
ENSG00000162745.10_7	420	144	293	57	89	124	1.337656	0.997887	1.250156	0.221472	0.342084	0.541008	ENSG00000162745	-1.897922095	down	1.07E-07	1.43E-06	OLFML2B
ENSG00000162746.14_3	27	21	46	82	145	70	0.135708	0.229188	0.308824	0.502345	0.87949	0.438107	ENSG00000162746	1.383191544	up	0.011886621	0.045779685	FCRLB
ENSG00000162772.17_7	785	270	492	2597	5977	3186	4.514747	2.975903	3.364018	16.396372	37.4725	20.984625	ENSG00000162772	2.696100015	up	9.47E-25	6.95E-23	ATF3
ENSG00000162813.18_7	711	330	631	324	325	286	3.643483	3.53792	3.667546	1.809863	1.794621	1.578217	ENSG00000162813	-1.063449894	down	1.11E-05	0.000101798	BPNT1
ENSG00000162819.12_5	1419	1292	1676	3732	4976	3682	3.987274	7.940563	6.348785	15.550361	19.392305	14.657378	ENSG00000162819	1.179869997	up	4.84E-09	7.89E-08	BROX
ENSG00000162885.13_5	287	134	334	1124	1129	993	0.666897	0.697545	1.013252	3.012259	3.030003	2.869016	ENSG00000162885	1.886435515	up	6.93E-15	2.34E-13	B3GALNT2
ENSG00000162924.15_7	225	176	418	75	105	133	0.200809	0.338568	0.498912	0.080757	0.112924	0.149102	ENSG00000162924	-1.672631997	down	3.47E-06	3.55E-05	REL
ENSG00000162971.11_5	521	436	658	1623	1914	1733	1.239596	1.98306	1.869936	4.164405	4.720398	4.953562	ENSG00000162971	1.408253388	up	3.86E-12	9.60E-11	TYW5
ENSG00000162980.17_6	576	442	635	187	279	271	2.167979	1.822809	1.729313	0.431551	0.64077	0.652393	ENSG00000162980	-1.473874949	down	1.44E-09	2.55E-08	ARL5A
ENSG00000162998.5_5	91	45	80	5	11	18	0.343432	0.365062	0.403886	0.018514	0.050387	0.084192	ENSG00000162998	-2.94774431	down	5.67E-06	5.55E-05	FRZB
ENSG00000163017.14_5	255	64	116	15	25	0	1.689474	0.67219	1.020559	0.087283	0.144414	0	ENSG00000163017	-3.592662928	down	0.00694806	0.029423925	ACTG2
ENSG00000163032.12_5	299	286	449	31	20	25	1.236334	2.555635	2.53671	0.137359	0.084529	0.112694	ENSG00000163032	-4.057293445	down	1.09E-26	9.12E-25	VSNL1
ENSG00000163131.11_6	99	44	128	11	39	38	0.364987	0.238769	0.434459	0.033119	0.117701	0.120605	ENSG00000163131	-1.88593711	down	0.001184813	0.006539047	CTSS
ENSG00000163132.8_6	71	23	56	130	180	191	0.366347	0.248931	0.385257	0.967014	1.121755	1.251062	ENSG00000163132	1.520396402	up	0.000310147	0.002028548	MSX1
ENSG00000163155.12_5	111	74	85	454	456	393	0.450718	0.645491	0.45969	2.248481	2.24526	2.028614	ENSG00000163155	1.995111254	up	2.62E-11	5.89E-10	LYSMD1
ENSG00000163171.8_4	803	365	530	1129	1456	1682	1.817964	1.543225	1.550004	2.928654	3.444323	4.724823	ENSG00000163171	1.074289013	up	1.36E-07	1.80E-06	CDC42EP3
ENSG00000163216.7_5	0	0	0	272	160	241	0	0	0	4.887967	2.856815	4.517265	ENSG00000163216	9.975145927	up	2.91E-15	1.01E-13	SPRR2D
ENSG00000163235.16_8	2338	1415	1271	293	309	363	6.576283	7.549727	4.819617	0.866431	1.058857	1.441516	ENSG00000163235	-2.673687672	down	1.78E-30	1.83E-28	TGFA
ENSG00000163288.14_6	237	158	243	41	88	52	1.244127	1.756385	1.826615	0.246127	0.650379	0.330643	ENSG00000163288	-2.113515657	down	2.37E-08	3.50E-07	GABRB1
ENSG00000163297.17_5	66	48	98	169	172	305	0.078235	0.122117	0.156033	0.305505	0.246718	0.459873	ENSG00000163297	1.322858036	up	0.000845338	0.004899139	ANTXR2
ENSG00000163328.13_5	173	59	195	31	72	79	0.283312	0.173889	0.424528	0.051349	0.118346	0.135817	ENSG00000163328	-1.461035706	down	0.001858828	0.009633805	GPR155
ENSG00000163347.6_5	247	236	322	1043	2256	1792	0.725497	1.502188	1.255008	3.836723	8.020749	6.60628	ENSG00000163347	2.317506742	up	2.83E-19	1.37E-17	CLDN1
ENSG00000163359.16_5	1370	862	1485	614	665	954	1.493289	1.971439	2.751567	0.949582	1.083043	1.583941	ENSG00000163359	-1.012550512	down	5.58E-07	6.66E-06	COL6A3
ENSG00000163382.12_5	6048	2813	5176	15015	13572	14280	55.099194	55.224216	63.099712	165.433945	148.884766	164.21225	ENSG00000163382	1.386958757	up	1.39E-16	5.37E-15	NAXE
ENSG00000163393.13_4	6	11	22	63	67	98	0.011918	0.132157	0.127346	0.163328	0.214015	0.329727	ENSG00000163393	2.220705872	up	0.001183793	0.006534949	SLC22A15
ENSG00000163431.13_7	55	19	67	0	4	0	0.17784	0.100784	0.229009	0	0.012349	0	ENSG00000163431	-5.366036842	down	2.90E-06	3.01E-05	LMOD1
ENSG00000163435.16_7	302	154	243	81	47	51	0.983795	1.488645	0.834356	0.206153	0.148184	0.267809	ENSG00000163435	-2.182459714	down	1.53E-08	2.32E-07	ELF3
ENSG00000163453.11_5	1368	1049	1675	429	476	630	9.699078	15.95607	15.908097	3.813312	4.036002	5.602149	ENSG00000163453	-1.712202488	down	1.89E-16	7.23E-15	IGFBP7
ENSG00000163467.11_3	27	0	12	81	75	55	0.401235	0	0.206024	1.576255	1.442997	1.137029	ENSG00000163467	2.377531339	up	0.004493602	0.020402283	TSACC
ENSG00000163472.19_6	38	26	97	189	297	274	0.193746	0.225265	0.532208	0.947408	1.489707	1.57261	ENSG00000163472	1.985784103	up	5.31E-06	5.23E-05	TMEM79
ENSG00000163499.12_5	190	99	192	15	31	65	2.166095	2.517788	3.588503	0.306503	0.422961	0.95475	ENSG00000163499	-2.406011898	down	8.98E-07	1.03E-05	CRYBA2
ENSG00000163521.16_6	106	71	173	19	31	58	0.474169	0.561662	0.855401	0.141926	0.135024	0.265907	ENSG00000163521	-1.986025082	down	0.000129399	0.000933805	GLB1L
ENSG00000163528.13_7	456	284	508	1921	2186	1820	3.144571	4.30205	4.731975	15.880186	18.214325	15.585323	ENSG00000163528	1.988654703	up	1.16E-24	8.42E-23	CHCHD4
ENSG00000163536.12_3	1206	618	1126	386	470	575	6.412674	7.119708	8.275166	2.503126	3.021801	3.864015	ENSG00000163536	-1.300600123	down	1.02E-10	2.13E-09	SERPINI1
ENSG00000163565.18_6	23349	11284	16717	4714	8472	7231	81.095657	101.847206	90.283745	21.157623	34.618332	36.5322	ENSG00000163565	-1.598934563	down	3.47E-19	1.66E-17	IFI16
ENSG00000163568.15_6	300	97	256	3	12	0	2.160362	1.64299	2.468083	0.024049	0.101114	0	ENSG00000163568	-5.649533714	down	2.30E-19	1.11E-17	AIM2
ENSG00000163577.8_5	410	448	489	1216	1323	1165	1.825429	2.567732	1.187936	3.706199	3.349994	3.804704	ENSG00000163577	1.121867983	up	5.29E-06	5.20E-05	EIF5A2
ENSG00000163597.15_4	2715	1581	2446	5909	6858	6739	11.469867	14.209124	13.810448	31.590912	34.867496	35.712147	ENSG00000163597	1.266738911	up	6.20E-19	2.92E-17	SNHG16
ENSG00000163629.13_5	769	515	690	241	228	406	0.952068	1.62114	1.348504	0.364629	0.343906	0.622561	ENSG00000163629	-1.469846125	down	1.09E-08	1.71E-07	PTPN13
ENSG00000163637.13_7	303	113	347	73	128	204	0.610617	0.56771	0.725284	0.205433	0.178088	0.384319	ENSG00000163637	-1.152260919	down	0.003055222	0.014715062	PRICKLE2
ENSG00000163638.13_6	179	102	203	317	447	557	0.307376	0.509511	0.360146	0.535266	0.731828	0.933966	ENSG00000163638	1.176213558	up	3.10E-05	0.000255754	ADAMTS9
ENSG00000163644.15_6	551	380	550	199	277	164	1.706477	3.041516	1.944349	0.52065	0.911141	0.576	ENSG00000163644	-1.492199199	down	4.55E-08	6.46E-07	PPM1K
ENSG00000163661.4_4	110	50	161	1295	3215	3053	0.585008	0.568137	1.149378	8.386116	20.684353	20.593	ENSG00000163661	4.297551743	up	1.99E-48	3.99E-46	PTX3
ENSG00000163682.16_6	10749	5251	5273	23805	22607	24854	97.444511	101.972046	72.350487	324.893005	295.556366	362.661896	ENSG00000163682	1.490189555	up	4.56E-13	1.26E-11	RPL9
ENSG00000163689.20_7	31	3	18	0	0	0	0.086574	0.014871	0.071225	0	0	0	ENSG00000163689	-6.663413987	down	0.000404431	0.002575986	C3orf67
ENSG00000163702.20_7	69	51	39	23	6	14	0.288643	0.411672	0.195713	0.107781	0.028838	0.067506	ENSG00000163702	-2.156804753	down	0.003365489	0.015946169	IL17RC
ENSG00000163734.4_4	292	493	947	258	397	220	2.574015	9.547892	11.425281	2.874003	4.484142	2.632535	ENSG00000163734	-1.31561569	down	0.000466412	0.002909525	CXCL3
ENSG00000163848.19_5	2024	1040	1501	578	1133	1008	2.352367	5.5897	6.018202	2.943477	4.029881	1.901922	ENSG00000163848	-1.028332525	down	1.45E-06	1.60E-05	ZNF148
ENSG00000163866.9_6	1763	764	1396	2748	3533	3056	8.816365	3.078804	5.235472	8.983432	11.854635	9.75407	ENSG00000163866	1.017799119	up	5.83E-09	9.38E-08	SMIM12
ENSG00000163874.11_5	711	459	805	329	503	297	2.679734	3.662199	4.07153	1.474408	2.295653	1.3794	ENSG00000163874	-1.077840687	down	1.96E-05	0.000169604	ZC3H12A
ENSG00000163913.12_8	527	231	365	181	222	255	2.369939	2.958567	2.108716	1.225587	0.842956	1.238865	ENSG00000163913	-1.016684461	down	0.000141725	0.001012534	IFT122
ENSG00000163938.17_5	3140	1478	2820	6288	8482	7947	16.309605	16.494074	20.410374	38.053276	52.049294	50.791023	ENSG00000163938	1.366420116	up	1.83E-18	8.25E-17	GNL3
ENSG00000163947.11_8	399	196	378	39	135	102	1.024605	1.086659	1.905817	0.123828	0.422519	0.323159	ENSG00000163947	-2.099470635	down	1.98E-08	2.96E-07	ARHGEF3
ENSG00000164032.12_6	338669	140343	239783	629125	703072	622699	3923.241699	3509.717285	3715.226807	8820.233398	9834.889648	9113.061523	ENSG00000164032	1.221830282	up	1.99E-13	5.80E-12	H2AZ1
ENSG00000164051.14_9	404	179	422	1115	1172	917	2.762428	2.439414	3.985867	9.392796	9.616246	7.890083	ENSG00000164051	1.459124785	up	1.21E-09	2.16E-08	CCDC51
ENSG00000164054.15_6	51303	20944	28883	17842	17682	18067	233.757553	207.092514	178.281342	97.94957	92.705246	100.939972	ENSG00000164054	-1.139711582	down	1.22E-09	2.17E-08	SHISA5
ENSG00000164056.11_6	1133	541	719	283	221	168	10.493762	12.571298	8.384888	3.759938	2.278321	1.8762	ENSG00000164056	-2.052010394	down	3.45E-13	9.62E-12	SPRY1
ENSG00000164088.18_6	92	35	83	144	274	180	0.549903	0.3003	0.487807	1.079401	1.654786	1.398126	ENSG00000164088	1.276486707	up	0.001341052	0.007285508	PPM1M
ENSG00000164096.13_6	7939	4439	5409	2758	2325	2507	29.703159	35.732571	27.026484	12.470263	10.388246	11.84877	ENSG00000164096	-1.483891213	down	2.36E-15	8.23E-14	C4orf3
ENSG00000164099.3_5	174	110	311	10	9	62	0.371561	0.568306	0.880294	0.025092	0.020919	0.164432	ENSG00000164099	-3.171163033	down	1.08E-07	1.44E-06	PRSS12
ENSG00000164100.9_4	47	51	20	0	11	0	0.092831	0.210309	0.04535	0	0.021549	0	ENSG00000164100	-3.883037306	down	0.000770692	0.004513085	NDST3
ENSG00000164105.4_4	109	58	50	22	11	19	0.987837	1.139358	0.604138	0.243887	0.119501	0.217213	ENSG00000164105	-2.312719467	down	0.000219108	0.001490501	SAP30
ENSG00000164106.8_5	100	42	42	24	0	15	0.496454	0.392263	0.190055	0.09378	0	0.045504	ENSG00000164106	-2.410274	down	0.007276036	0.030582411	SCRG1
ENSG00000164107.8_5	0	20	10	0	0	0	0	0.333485	0.045227	0	0	0	ENSG00000164107	-6.351040884	down	0.004814963	0.021636629	HAND2
ENSG00000164116.16_5	63	40	61	13	16	16	0.143721	0.193389	0.272039	0.034249	0.106525	0.046028	ENSG00000164116	-2.144042155	down	0.00078417	0.004586151	GUCY1A1
ENSG00000164125.15_7	104	89	91	7	0	10	0.207984	0.564652	0.245373	0.015776	0	0.025278	ENSG00000164125	-4.374855729	down	1.65E-09	2.90E-08	GASK1B
ENSG00000164171.11_4	1888	999	1460	411	510	553	2.421651	2.763418	2.504006	0.639547	0.788246	0.895436	ENSG00000164171	-1.825842819	down	1.66E-23	1.16E-21	ITGA2
ENSG00000164176.13_7	1734	1501	1525	455	640	948	3.980479	7.023714	4.445529	1.151939	1.650983	2.537224	ENSG00000164176	-1.573362172	down	1.13E-10	2.35E-09	EDIL3
ENSG00000164182.11_6	473	251	362	2365	1971	1476	7.693326	8.774863	7.933871	47.204346	39.048199	30.487726	ENSG00000164182	2.190297455	up	1.64E-19	8.13E-18	NDUFAF2
ENSG00000164188.8_6	27	18	21	0	6	0	0.085787	0.121164	0.088409	0	0.022601	0	ENSG00000164188	-3.802752694	down	0.005257371	0.023261525	RANBP3L
ENSG00000164199.18_10	343	186	270	74	163	142	0.699574	0.524755	0.761234	0.08478	0.45364	0.535241	ENSG00000164199	-1.365062624	down	3.59E-05	0.000292898	ADGRV1
ENSG00000164211.13_5	251	200	329	132	134	193	0.999114	2.576934	1.82524	0.73628	1.091046	1.242129	ENSG00000164211	-1.061305479	down	0.00075987	0.004459451	STARD4
ENSG00000164220.7_6	671	389	537	33	62	16	2.004923	2.988438	2.136909	0.115901	0.219562	0.058454	ENSG00000164220	-4.11567194	down	1.90E-28	1.77E-26	F2RL2
ENSG00000164221.13_6	158	70	56	219	311	419	0.704624	0.636541	0.326116	1.153916	1.586005	2.275653	ENSG00000164221	1.463225723	up	0.000146779	0.001044218	CCDC112
ENSG00000164266.10_4	0	8	13	97	68	78	0	0.252743	0.297979	2.155219	1.493303	1.791826	ENSG00000164266	3.17760043	up	0.000140898	0.001007845	SPINK1
ENSG00000164284.15_4	129	98	77	290	354	346	0.313577	0.527481	0.289369	0.926464	1.343001	1.092418	ENSG00000164284	1.381570302	up	3.40E-05	0.000278465	GRPEL2
ENSG00000164296.7_5	261	102	180	610	496	415	1.128009	1.44704	1.708301	5.004882	3.844488	3.137139	ENSG00000164296	1.288629002	up	1.99E-05	0.000172476	TIGD6
ENSG00000164300.17_5	1858	953	1604	3880	4180	3795	2.974703	3.2927	3.358463	7.356605	7.933051	7.522182	ENSG00000164300	1.181908123	up	4.34E-13	1.20E-11	SERINC5
ENSG00000164307.13_7	302	216	402	170	155	185	0.583736	1.008856	1.062628	0.490862	0.424358	0.485437	ENSG00000164307	-1.119205915	down	0.000157011	0.00110899	ERAP1
ENSG00000164327.13_7	243	310	163	126	122	86	0.563413	2.199614	0.395167	0.322843	0.391297	0.267331	ENSG00000164327	-1.489580598	down	0.000417499	0.002647787	RICTOR
ENSG00000164330.17_5	3341	2674	3946	290	430	210	8.228837	13.947189	15.404194	1.301546	1.031392	0.995453	ENSG00000164330	-3.715778674	down	1.27E-53	3.00E-51	EBF1
ENSG00000164342.13_6	120	68	106	13	13	29	0.20034	0.28296	0.236256	0.025432	0.025664	0.059732	ENSG00000164342	-2.699049322	down	7.78E-07	9.03E-06	TLR3
ENSG00000164346.10_7	1686	826	1353	3138	3365	2891	4.389803	6.007867	4.527247	9.007713	10.458755	10.810792	ENSG00000164346	1.043697286	up	2.70E-09	4.58E-08	NSA2
ENSG00000164434.12_4	11185	3515	5401	651	663	609	143.335541	97.077766	92.480385	9.967285	10.214096	9.843338	ENSG00000164434	-3.576756966	down	1.76E-53	4.07E-51	FABP7
ENSG00000164509.15_5	46	3	51	199	146	282	0.168078	0.016356	0.244914	0.873849	0.604153	1.271061	ENSG00000164509	2.526036976	up	9.68E-06	8.97E-05	IL31RA
ENSG00000164603.12_8	75	46	128	31	39	44	0.190598	0.250431	0.436749	0.093183	0.118771	0.141559	ENSG00000164603	-1.378988305	down	0.008778259	0.035689079	BMT2
ENSG00000164610.9_8	138	81	181	406	448	443	1.219442	1.535761	2.145145	4.355191	4.783478	4.969972	ENSG00000164610	1.44791444	up	3.94E-07	4.83E-06	RP9
ENSG00000164619.10_7	38	25	30	3	8	0	0.071933	0.099064	0.074364	0.006464	0.018252	0	ENSG00000164619	-3.37022416	down	0.001658533	0.008738768	BMPER
ENSG00000164626.9_5	146	102	161	8	7	28	0.387549	0.584559	0.570751	0.023918	0.019912	0.0926	ENSG00000164626	-3.560582655	down	1.71E-10	3.45E-09	KCNK5
ENSG00000164627.18_5	42	21	7	143	208	231	0.07657	0.112608	0.008924	0.351063	1.43781	1.81698	ENSG00000164627	2.756862511	up	2.46E-07	3.11E-06	KIF6
ENSG00000164674.15_3	20	0	0	35	53	98	0.068093	0	0	0.144589	0.219413	0.447867	ENSG00000164674	3.132037535	up	0.004065665	0.0187588	SYTL3
ENSG00000164683.18_6	2210	1127	1754	447	531	534	9.120619	11.047576	10.606929	2.458407	2.881481	3.050094	ENSG00000164683	-2.00622319	down	4.36E-30	4.43E-28	HEY1
ENSG00000164690.8_5	4	0	24	274	194	237	0.00701	0	0.069006	0.718436	0.503424	0.647178	ENSG00000164690	4.542612464	up	0.00034446	0.002231334	SHH
ENSG00000164692.18_4	15576	10360	11446	2202	2222	3360	32.067719	46.059235	31.435558	5.612976	5.718709	9.219263	ENSG00000164692	-2.566989678	down	6.29E-42	9.71E-40	COL1A2
ENSG00000164742.16_5	39	28	28	97	99	104	0.030206	0.046527	0.029575	0.150408	0.094225	0.103892	ENSG00000164742	1.36336077	up	0.006526664	0.027934885	ADCY1
ENSG00000164761.9_5	478	202	410	122	174	177	2.325232	2.105883	2.68021	0.731731	1.053849	1.085942	ENSG00000164761	-1.442719775	down	3.06E-07	3.82E-06	TNFRSF11B
ENSG00000164828.18_8	2165	1173	1991	5956	5506	4960	18.766253	19.944363	23.067194	106.446541	83.464813	79.342064	ENSG00000164828	1.38585856	up	6.92E-15	2.34E-13	SUN1
ENSG00000164830.18_8	645	518	758	266	447	405	2.160008	3.119905	3.815195	0.771606	2.025442	1.777448	ENSG00000164830	-1.09709102	down	5.23E-06	5.15E-05	OXR1
ENSG00000164850.15_7	674	347	433	83	97	83	2.587381	2.873045	2.228596	0.34628	0.449484	0.401089	ENSG00000164850	-2.725644502	down	2.30E-22	1.44E-20	GPER1
ENSG00000164897.14_7	66	68	92	7	8	20	0.490944	1.101019	0.913403	0.046854	0.061948	0.158316	ENSG00000164897	-3.041146952	down	2.44E-06	2.57E-05	TMUB1
ENSG00000164898.13_7	879	420	807	3102	2813	1753	9.022386	8.986956	10.913797	38.98035	33.710827	22.212111	ENSG00000164898	1.655664186	up	1.75E-11	4.00E-10	FMC1
ENSG00000164916.11_5	707	460	711	1552	1813	2208	0.780041	1.020136	0.898153	2.09021	2.092375	2.831668	ENSG00000164916	1.285423654	up	1.12E-12	2.93E-11	FOXK1
ENSG00000164951.16_7	979	701	935	1917	2844	2632	3.061577	3.660103	3.318465	5.91434	10.342899	9.975134	ENSG00000164951	1.194495896	up	2.68E-11	5.99E-10	PDP1
ENSG00000164975.15_3	247	211	415	559	790	1346	0.577856	1.239696	1.487474	1.648077	2.316472	5.191218	ENSG00000164975	1.311624642	up	1.35E-05	0.00012102	SNAPC3
ENSG00000165029.16_5	526	431	793	1910	3018	2579	0.526289	0.899915	1.053251	2.250805	3.574991	3.148521	ENSG00000165029	1.801339737	up	9.23E-17	3.63E-15	ABCA1
ENSG00000165030.4_5	217	81	121	383	669	726	1.059929	0.852229	0.791983	2.272023	3.944414	4.490074	ENSG00000165030	1.835084421	up	9.21E-10	1.68E-08	NFIL3
ENSG00000165072.10_5	370	223	219	80	104	93	1.108562	1.510082	0.875523	0.288414	0.375525	0.349994	ENSG00000165072	-1.842854731	down	2.52E-08	3.71E-07	MAMDC2
ENSG00000165091.18_5	17	28	11	0	4	4	0.067321	0.340898	0.026333	0	0.016015	0.007744	ENSG00000165091	-3.322556655	down	0.008915479	0.036141144	TMC1
ENSG00000165105.10_5	22	35	17	3	2	7	0.082176	0.427845	0.101828	0.017765	0.00925	0.048442	ENSG00000165105	-3.07524248	down	0.003388748	0.016036768	RASEF
ENSG00000165125.21_9	0	0	0	14	7	15	0	0	0	0.015919	0.007665	0.017652	ENSG00000165125	5.745126054	up	0.005938545	0.025814983	TRPV6
ENSG00000165171.11_8	134	74	116	442	540	525	1.46064	1.810753	1.671553	6.157156	7.087371	7.402822	ENSG00000165171	1.95409979	up	8.96E-14	2.71E-12	METTL27
ENSG00000165186.12_5	46	24	19	99	86	200	0.035362	0.040362	0.019213	0.092859	0.080113	0.196996	ENSG00000165186	1.822579734	up	0.000732233	0.004324334	PTCHD1
ENSG00000165194.15_7	110	40	130	12	11	27	0.113068	0.087071	0.178681	0.014462	0.013288	0.033979	ENSG00000165194	-2.703836882	down	6.85E-06	6.56E-05	PCDH19
ENSG00000165197.5_8	0	0	0	13	8	12	0	0	0	0.071409	0.040817	0.072902	ENSG00000165197	5.621992092	up	0.008620628	0.035169363	VEGFD
ENSG00000165349.12_5	35	14	34	92	127	146	0.156495	0.132025	0.201791	0.49716	0.684685	0.823037	ENSG00000165349	1.896772804	up	0.000116299	0.000850446	SLC7A3
ENSG00000165379.13_6	61	25	150	25	12	33	0.160581	0.140057	0.490268	0.121935	0.034206	0.186107	ENSG00000165379	-1.932992572	down	0.004557427	0.02065631	LRFN5
ENSG00000165409.17_5	124	161	194	26	14	43	1.0191	2.409703	2.052493	0.067256	0.088131	0.128765	ENSG00000165409	-2.88402728	down	1.06E-08	1.65E-07	TSHR
ENSG00000165434.8_5	4122	2830	4302	1568	2195	2246	6.043815	8.322586	7.3263	2.360575	3.301796	3.586533	ENSG00000165434	-1.200071107	down	1.09E-13	3.26E-12	PGM2L1
ENSG00000165474.8_8	590	282	506	169	228	299	2.557432	2.634445	2.959094	0.888119	1.187709	1.636851	ENSG00000165474	-1.24391889	down	1.86E-06	1.99E-05	GJB2
ENSG00000165475.15_6	1141	459	874	473	450	480	7.853678	6.812599	7.958889	3.893267	3.714226	4.356012	ENSG00000165475	-1.032567135	down	4.22E-06	4.25E-05	CRYL1
ENSG00000165507.9_9	9079	5133	5718	1243	987	1355	43.222599	52.99453	36.355946	7.154338	5.640669	8.119642	ENSG00000165507	-2.740635602	down	1.70E-42	2.67E-40	DEPP1
ENSG00000165609.13_6	7966	3779	6487	19280	20486	16596	64.401901	32.741482	46.575027	230.509552	127.062073	104.823303	ENSG00000165609	1.398830954	up	1.36E-16	5.27E-15	NUDT5
ENSG00000165617.14_8	98	97	142	27	56	93	0.262691	0.56106	0.510992	0.085946	0.180258	0.313489	ENSG00000165617	-1.294706552	down	0.009367746	0.037683307	DACT1
ENSG00000165637.13_5	16576	7402	12811	39519	43379	38624	107.698601	106.273499	114.70845	342.150787	339.215027	334.510986	ENSG00000165637	1.495818763	up	5.29E-21	3.01E-19	VDAC2
ENSG00000165650.12_5	1089	727	1419	3137	3323	2963	1.13305	1.662224	1.973122	3.957883	4.16399	3.893489	ENSG00000165650	1.284272701	up	1.96E-11	4.45E-10	PDZD8
ENSG00000165655.17_6	98	161	218	32	36	43	0.30563	1.089532	0.914491	0.120291	0.134207	0.167361	ENSG00000165655	-2.468423075	down	1.82E-07	2.35E-06	ZNF503
ENSG00000165661.17_7	118	41	99	244	308	376	0.263318	0.196961	0.295801	0.660288	0.828651	1.059741	ENSG00000165661	1.623273766	up	1.45E-06	1.60E-05	QSOX2
ENSG00000165678.21_5	28746	14987	22336	124590	142123	121219	121.414368	136.615585	126.139282	638.405762	723.3349	646.840698	ENSG00000165678	2.303327553	up	6.39E-53	1.47E-50	GHITM
ENSG00000165724.6_5	155	41	126	241	273	458	1.112799	0.627614	1.212328	2.102067	2.371845	4.173616	ENSG00000165724	1.393141017	up	0.000186462	0.001294146	ZMYND19
ENSG00000165752.17_6	99	43	86	187	166	243	0.755209	0.437325	0.804987	1.950881	1.569932	2.608187	ENSG00000165752	1.154880232	up	0.001952495	0.010049856	STK32C
ENSG00000165782.10_5	316	140	290	623	811	610	1.443277	1.621236	1.179615	3.939595	4.16745	3.288853	ENSG00000165782	1.223792315	up	6.67E-07	7.85E-06	PIP4P1
ENSG00000165795.23_7	664	502	636	206	261	318	3.245269	5.635245	3.778428	1.167494	1.750667	2.001033	ENSG00000165795	-1.511496272	down	2.71E-10	5.33E-09	NDRG2
ENSG00000165813.20_8	688	428	698	241	357	322	1.407917	1.639981	1.614143	0.524636	1.135605	0.889154	ENSG00000165813	-1.259792606	down	1.89E-08	2.83E-07	CCDC186
ENSG00000165891.16_7	299	248	220	739	1480	935	0.740439	0.936895	0.787001	2.00338	4.323544	3.120423	ENSG00000165891	1.694890056	up	1.20E-09	2.14E-08	E2F7
ENSG00000165898.14_4	2802	1507	2829	9933	8745	9776	13.620828	15.027849	17.308958	54.931374	49.018593	58.144115	ENSG00000165898	1.757696397	up	2.14E-25	1.63E-23	ISCA2
ENSG00000165914.15_6	83	27	44	137	182	256	0.042427	0.029769	0.03606	0.246938	0.242312	0.236904	ENSG00000165914	1.668252727	up	9.06E-05	0.000677537	TTC7B
ENSG00000165943.5_5	327	166	280	731	785	1002	1.300101	1.425182	1.485741	3.526997	3.760942	5.226586	ENSG00000165943	1.448739561	up	5.94E-11	1.27E-09	MOAP1
ENSG00000165949.12_7	1653181	626615	1115773	15424	5632	15819	25535.76953	20838.86328	23101.22461	287.042297	100.120804	315.34198	ENSG00000165949	-6.712320382	down	1.40E-47	2.65E-45	IFI27
ENSG00000165995.21_6	223	135	238	65	119	147	0.984349	1.557352	1.262924	0.367545	0.404634	0.347463	ENSG00000165995	-1.140969803	down	0.001484438	0.007951022	CACNB2
ENSG00000166068.13_5	237	175	365	126	107	172	0.326936	0.520586	0.706564	0.211428	0.177363	0.299601	ENSG00000166068	-1.210890662	down	0.000380885	0.002441159	SPRED1
ENSG00000166123.14_6	269	212	275	1383	2081	1607	0.817425	1.305049	1.077855	4.621628	6.88587	5.313366	ENSG00000166123	2.437845396	up	2.90E-30	2.98E-28	GPT2
ENSG00000166130.15_6	213	153	169	67	81	142	1.126743	2.288311	1.302226	0.425345	0.517871	1.029155	ENSG00000166130	-1.206634431	down	0.001629122	0.008597232	IKBIP
ENSG00000166145.14_4	31	57	47	8	4	15	0.099162	0.440606	0.253089	0.031366	0.015181	0.05834	ENSG00000166145	-2.739612392	down	0.000687123	0.00409171	SPINT1
ENSG00000166166.13_4	197	132	248	505	785	969	0.615652	0.884952	1.034463	1.912561	2.955959	3.826191	ENSG00000166166	1.676764687	up	1.85E-10	3.72E-09	TRMT61A
ENSG00000166167.18_5	301	135	216	521	596	488	0.746671	0.530614	0.494957	1.089158	1.304082	1.045757	ENSG00000166167	1.065546702	up	3.32E-05	0.000272848	BTRC
ENSG00000166173.11_6	279	120	266	447	646	833	1.481793	1.518339	1.633432	2.352476	2.712414	3.120087	ENSG00000166173	1.286163748	up	1.39E-06	1.53E-05	LARP6
ENSG00000166224.17_7	3388	1714	2561	9942	11941	8476	6.02013	6.439407	6.187435	21.084206	25.174757	18.644148	ENSG00000166224	1.741227833	up	2.36E-22	1.48E-20	SGPL1
ENSG00000166228.9_5	1000	359	633	2477	2462	2348	13.731153	10.471801	11.450638	39.67841	39.088303	39.118099	ENSG00000166228	1.667023273	up	6.20E-15	2.12E-13	PCBD1
ENSG00000166250.12_6	433	291	422	106	174	197	0.871793	1.272168	1.13382	0.256039	0.418647	0.495639	ENSG00000166250	-1.568530564	down	2.46E-08	3.63E-07	CLMP
ENSG00000166262.16_10	132	80	100	60	34	71	1.183982	0.658402	0.938356	0.534635	0.242431	0.458591	ENSG00000166262	-1.184980221	down	0.012492102	0.047606728	FAM227B
ENSG00000166289.6_4	92	44	74	281	314	343	0.540933	0.551101	0.597982	2.13913	2.236749	2.612607	ENSG00000166289	1.910655155	up	1.90E-09	3.31E-08	PLEKHF1
ENSG00000166292.12_6	63	64	31	0	0	0	0.359561	0.701233	0.255223	0	0	0	ENSG00000166292	-8.542547175	down	1.80E-09	3.15E-08	TMEM100
ENSG00000166341.8_5	61	39	69	16	22	28	0.056662	0.078644	0.086173	0.017409	0.024428	0.03224	ENSG00000166341	-1.640507047	down	0.007003272	0.02962054	DCHS1
ENSG00000166351.10_3	99	93	66	0	14	6	0.519496	1.061147	0.470779	0	0.08354	0.036913	ENSG00000166351	-4.102680681	down	8.11E-08	1.11E-06	POTED
ENSG00000166401.15_6	189	157	178	458	528	449	0.863657	1.452045	1.147753	3.733288	3.146572	2.800745	ENSG00000166401	1.145540854	up	2.68E-05	0.00022428	SERPINB8
ENSG00000166405.15_7	335	208	331	130	174	190	2.480992	3.345528	3.303301	0.932723	1.434087	1.414881	ENSG00000166405	-1.104537937	down	8.07E-05	0.000609301	RIC3
ENSG00000166446.15_6	117	52	126	254	303	463	0.212241	0.132136	0.275837	0.367367	0.435135	0.697913	ENSG00000166446	1.544218188	up	3.87E-06	3.92E-05	CDYL2
ENSG00000166448.14_6	75	45	71	0	8	0	0.24725	0.285353	0.293636	0	0.023887	0	ENSG00000166448	-4.886898437	down	3.56E-07	4.40E-06	TMEM130
ENSG00000166452.12_7	2804	1274	2197	4844	6680	5106	22.648247	22.171223	24.572643	48.903549	69.210579	53.981724	ENSG00000166452	1.166527303	up	1.56E-11	3.61E-10	AKIP1
ENSG00000166483.11_5	2073	912	1473	643	816	982	4.598664	4.397708	4.537319	2.122992	2.70801	4.044337	ENSG00000166483	-1.11682808	down	1.23E-08	1.91E-07	WEE1
ENSG00000166575.17_6	215	243	267	90	130	158	0.409324	1.181825	0.534056	0.280517	0.409892	0.222602	ENSG00000166575	-1.305361577	down	0.000203595	0.001399496	TMEM135
[truncated: 1,942 more rows]
